# Supplementary material for: Synthesis of 2-fluorinated pyrazolo[1,5-a]pyridines via base- mediated [3+2] cycloaddition of N-aminopyridinium salts with gem-difluorostyrenes
Source: Royal Society of Chemistry journal article supplement (doi:10.1039/d4nj02150a), 2024-01-01

# Supporting Information

## Synthesis of 2-Fluorinated Pyrazolo[1,5-*a*]pyridines via Base-Mediated [3+2] Cycloaddition of *N*-Aminopyridinium Salts with *gem*-Difluorostyrenes

Yang Feng, Yuanyuan Wu, Zengjiang Yue, Ying Fu,<sup>\*</sup> and Zhengyin Du<sup>\*</sup>

† College of Chemistry and Chemical Engineering, Northwest Normal University,  
967 Anning East Road, Lanzhou 730070, P. R. China

Email: clinton\_du@126.com; fu\_yingmail@126.com

### Table of Contents

|                                                                                              |     |
|----------------------------------------------------------------------------------------------|-----|
| 1. Materials and Methods .....                                                               | 2   |
| 2. Experimental procedures and characterization data .....                                   | 3   |
| 2.1. The synthesis of compounds <b>1</b> according to the following procedure.....           | 3   |
| 2.2. Characterization data of some starting materials <b>1</b> .....                         | 3   |
| 2.3. NMR spectra for some starting materials <b>1</b> .....                                  | 7   |
| 2.4. The synthesis of compounds <b>2</b> according to the following procedure <b>2</b> ..... | 21  |
| 2.5. Characterization data of some starting materials <b>2</b> .....                         | 21  |
| 2.6. NMR and HRMS spectra copies of some starting materials <b>2</b> .....                   | 24  |
| 3. General procedure for the synthesis of compounds <b>3</b> or <b>4</b> .....               | 44  |
| 4. References.....                                                                           | 44  |
| 5. Characterization data of compounds <b>3</b> and <b>4</b> .....                            | 45  |
| 6. NMR and HRMS spectra copies of compounds <b>3</b> and <b>4</b> .....                      | 61  |
| 7. Crystallography data of compound <b>3c</b> .....                                          | 163 |
| 8. The electron cloud density of two unsaturated carbons of (2,2-difluorovinyl)benzene ..... | 165 |

## 1. Materials and Methods

All chemicals were purchased from Energy Chemical Reagent, Ltd, Zane Chemical Technology company, Aladdin Ltd, Crystal pure bio-tech company and so forth. Unless otherwise stated, all experiments were conducted in a seal tube under argon atmosphere. Reactions were monitored by TLC or GC-MS analysis. Flash column chromatography was performed over silica gel (200-300 mesh).

$^1\text{H}$ -NMR,  $^{13}\text{C}$ -NMR and  $^{19}\text{F}$ -NMR spectra were recorded in  $\text{CDCl}_3$  on Nuclear Magnetic Resonance spectrometer (400 MHz for  $^1\text{H}$  or 600 MHz for  $^1\text{H}$ , 151 MHz for  $^{13}\text{C}$ , 376 MHz for  $^{19}\text{F}$ ) at room temperature. Chemical shifts were reported in ppm on the scale relative to  $\text{CDCl}_3$  ( $\delta = 7.26$  for  $^1\text{H}$  NMR,  $\delta = 77.00$  for  $^{13}\text{C}$  NMR) as an internal reference. High resolution mass spectra were recorded using ZAB-HS Bifocal high resolution mass spectrometer. Coupling constants (J) were reported in Hertz (Hz).

## 2. Experimental procedures and characterization data

### 2.1. The synthesis of compounds **1** according to the following procedure

The substrates **1** were prepared according to the procedures in the literature<sup>1</sup>.

As exemplified for **1a**:

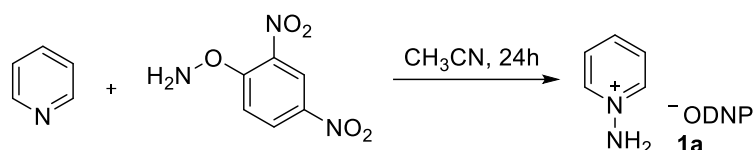

To a solution of pyridine (0.47 g, 6.0 mmol) in acetonitrile (25 mL) was added *O*-(2,4-dinitrophenyl) hydroxylamine (1.3 g, 6.6 mmol). The reaction flask was sealed with rubber plug, and the reaction mixture was stirred for 24 h at room temperature, then upon filtering off the solvent. The orange solid was obtained, which was used in the next step without further purification.

### 2.2 Characterization data of some starting materials **1**

All characterization data of compounds **1** are consistent with literature after contrast. As known compounds, we herein list the melting point, <sup>1</sup>H NMR and <sup>13</sup>C NMR data of some compounds **1**.

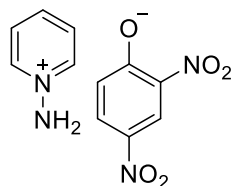

#### **1-Aminopyridin-1-ium ylide (1a)**

Yellow solid; Yield = 1.25 g (75%); mp 149 - 151 °C. <sup>1</sup>H NMR (600 MHz, CD<sub>3</sub>SOCD<sub>3</sub>), δ: 8.85 (s, 2H), 8.74 - 8.59 (m, 3H), 8.30 (t, *J* = 7.8 Hz, 1H), 8.05 (t, *J* = 7.2 Hz, 2H), 7.85 - 7.83 (m, 1H), 6.42 (d, *J* = 9.6 Hz, 1H). <sup>13</sup>C NMR (150 MHz, CD<sub>3</sub>SOCD<sub>3</sub>), δ: 170.9, 139.9, 138.6, 136.5, 128.6, 128.6, 128.0, 127.0, 125.4.

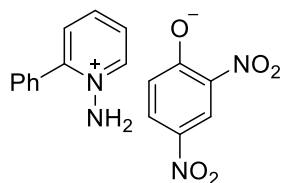

### 1-Amino-2-phenylpyridin-1-ium ylide (1c)

Yellow solid; Yield = 1.32 g (62%); mp 134-136 °C. **<sup>1</sup>H NMR** (400 MHz, CD<sub>3</sub>SOCD<sub>3</sub>),  $\delta$ : 9.04 (s, 1H), 8.67 (s, 1H), 8.40 (t,  $J = 7.2$  Hz, 1H), 8.13 - 8.03 (m, 4H), 7.86 - 7.78 (m, 3H), 7.64 (s, 3H), 6.41 (d,  $J = 8.0$  Hz, 1H). **<sup>13</sup>C NMR** (150 MHz, CD<sub>3</sub>SOCD<sub>3</sub>),  $\delta$ : 170.6, 150.1, 141.3, 141.2, 136.4, 131.4, 130.8, 130.4, 130.1, 129.2, 128.1, 127.4, 126.8, 125.4.

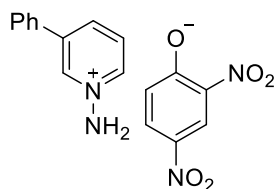

### 1-Amino-3-phenylpyridin-1-ium ylide (1e)

Yellow solid; Yield = 1.49 g (70%); mp 118 - 120 °C. **<sup>1</sup>H NMR** (400 MHz, CD<sub>3</sub>SOCD<sub>3</sub>),  $\delta$ : 9.18 (s, 1H), 8.81 (s, 1H), 8.76 - 8.53 (m, 4H), 8.09 (t,  $J = 8.0$  Hz, 1H), 7.88 - 7.75 (m, 3H), 7.67 - 7.50 (m, 3H), 6.40 (d,  $J = 10.0$  Hz, 1H). **<sup>13</sup>C NMR** (150 MHz, CD<sub>3</sub>SOCD<sub>3</sub>),  $\delta$ : 170.9, 140.1, 137.2, 136.7, 136.4, 136.2, 133.6, 130.5, 129.9, 128.4, 128.0, 127.6, 127.0, 125.4.



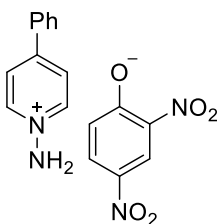

### 1-Amino-4-phenylpyridin-1-ium ylide (1i)

Yellow solid; Yield = 1.70 g (80%); mp 164 - 166 °C. **<sup>1</sup>H NMR** (400 MHz, CD<sub>3</sub>SOCD<sub>3</sub>),  $\delta$ : 8.82 (d,  $J$  = 7.2 Hz, 2H), 8.62 (d,  $J$  = 3.2 Hz, 1H), 8.47 (s, 2H), 8.37 (d,  $J$  = 7.2 Hz, 2H), 7.99 - 7.97 (m, 2H), 7.84 (dd,  $J$  = 10.0, 3.2 Hz, 1H), 7.67 - 7.57 (m, 3H), 6.43 (d,  $J$  = 10.0 Hz, 1H). **<sup>13</sup>C NMR** (150 MHz, CD<sub>3</sub>SOCD<sub>3</sub>),  $\delta$ : 169.7, 149.9, 139.0, 136.5, 134.2, 131.8, 130.0, 128.7, 128.1, 128.0, 126.4, 125.2, 125.1.

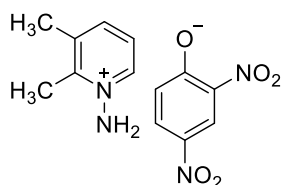

### 1-Amino-2,3-dimethylpyridin-1-ium ylide (1j)

Yellow solid; Yield = 1.54 g (84%); mp 101 - 103 °C. **<sup>1</sup>H NMR** (400 MHz, CD<sub>3</sub>SOCD<sub>3</sub>),  $\delta$ : 8.72 (d,  $J$  = 6.4 Hz, 1H), 8.61 (d,  $J$  = 3.2 Hz, 1H), 8.12 - 8.10 (m, 3H), 7.80 (dd,  $J$  = 9.6, 3.2 Hz, 1H), 7.76 (t,  $J$  = 7.2 Hz, 1H), 6.36 (d,  $J$  = 10.0 Hz, 1H), 2.66 (s, 3H), 2.47 (s, 3H). **<sup>13</sup>C NMR** (150 MHz, CD<sub>3</sub>SOCD<sub>3</sub>),  $\delta$ : 175.4, 154.9, 145.7 (d,  $J$  = 9.4 Hz), 143.1, 142.7 (d,  $J$  = 39.4 Hz), 141.2, 132.7, 131.7, 130.1 (d,  $J$  = 30.3 Hz), 129.6, 24.2, 20.4.

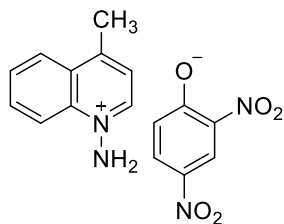

### 1-Amino-4-methylquinolin-1-ium ylide (1o)

Yellow solid; Yield = 1.48 g (72%); mp 164 - 166 °C.  $^1\text{H NMR}$  (600 MHz,  $\text{CD}_3\text{SOCD}_3$ ),  $\delta$ : 9.28 (d,  $J = 3.0$  Hz, 1H), 8.64 - 8.55 (m, 2H), 8.47 - 8.31 (m, 3H), 8.27 - 8.19 (t,  $J = 7.8$  Hz, 1H), 8.05 - 7.92 (m, 2H), 7.77 (dd,  $J = 9.6, 3.0$  Hz, 1H), 6.34 (d,  $J = 9.6$  Hz, 1H), 2.93 (s, 3H).  $^{13}\text{C NMR}$  (150 MHz,  $\text{CD}_3\text{SOCD}_3$ ),  $\delta$ : 170.8, 154.1, 143.2, 136.8, 136.4, 134.6, 130.2, 129.2, 127.9, 127.0, 126.7, 125.4, 122.7, 119.1, 19.5.

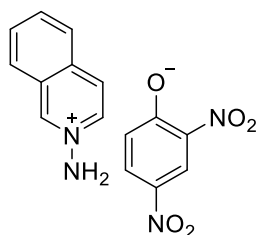

### 1-Aminoisoquinolin-2-ium ylide (1q)

Yellow solid; Yield = 1.34 g (68%); mp 160 - 162 °C.  $^1\text{H NMR}$  (400 MHz,  $\text{CD}_3\text{SOCD}_3$ ),  $\delta$ : 9.76 (s, 1H), 8.88 - 8.58 (m, 4H), 8.57 - 8.48 (m, 1H), 8.47 - 8.28 (m, 2H), 8.19 - 7.94 (m, 2H), 7.83 (dd,  $J = 9.6, 3.2$  Hz, 1H), 6.42 (d,  $J = 8.0$  Hz, 1H).  $^{13}\text{C NMR}$  (150 MHz,  $\text{CD}_3\text{SOCD}_3$ ),  $\delta$ : 170.7, 140.9, 136.4, 135.0, 134.3, 132.1, 131.4, 129.3, 128.0, 127.8, 127.6, 126.9, 126.7, 125.4.

## 2.3. NMR spectra for some starting materials 1

NMR copies of compound **1a**:

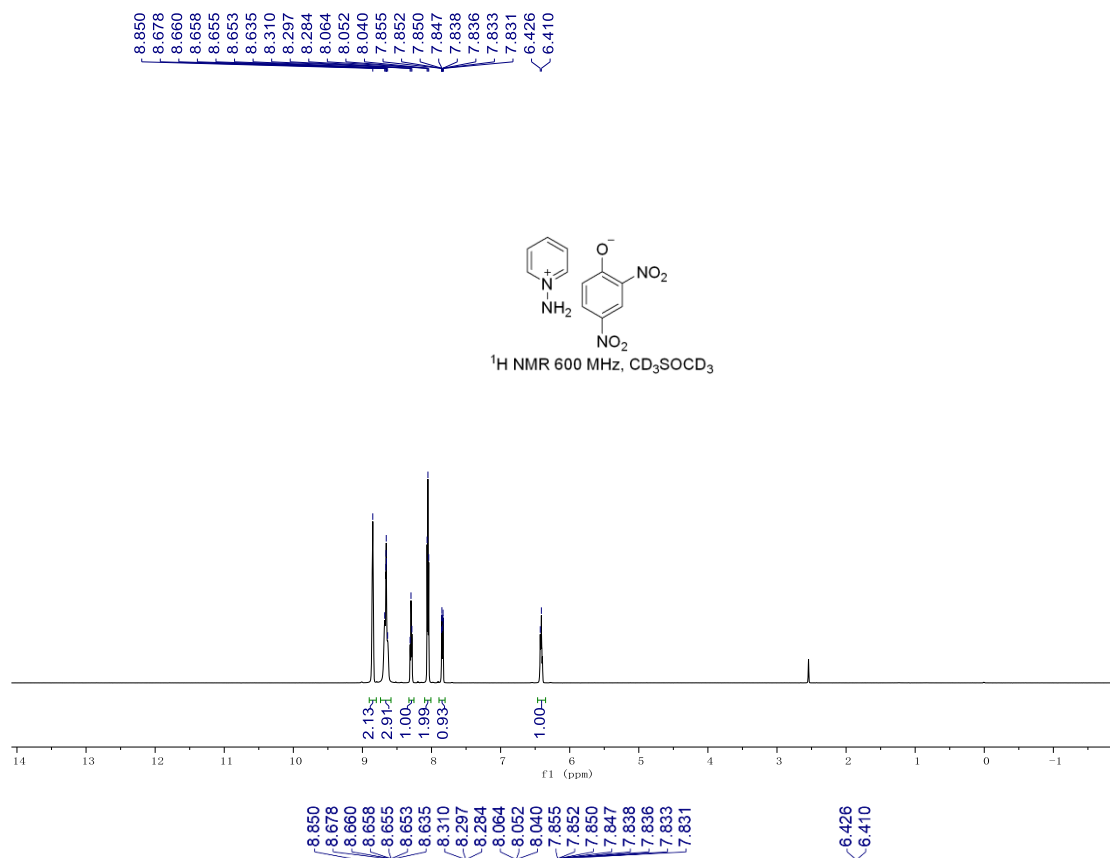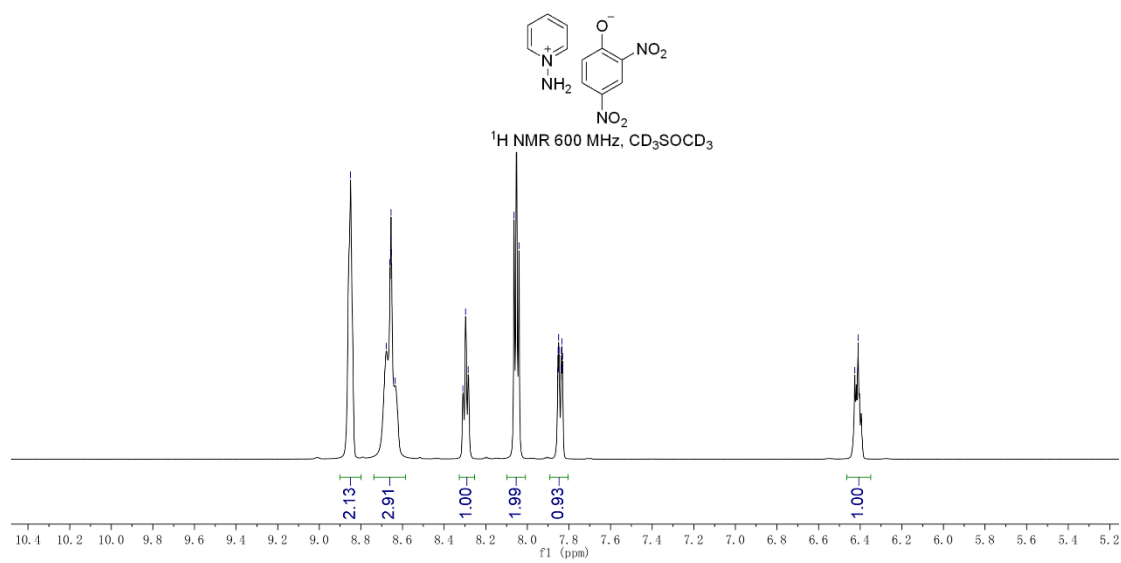

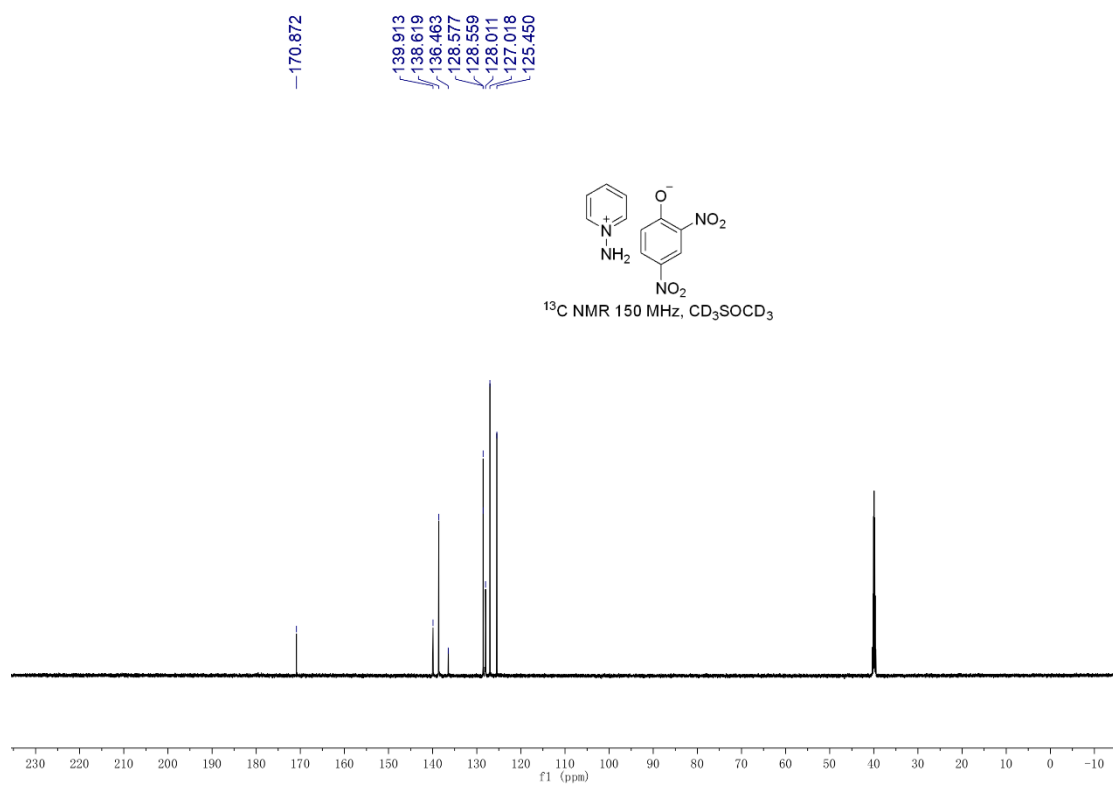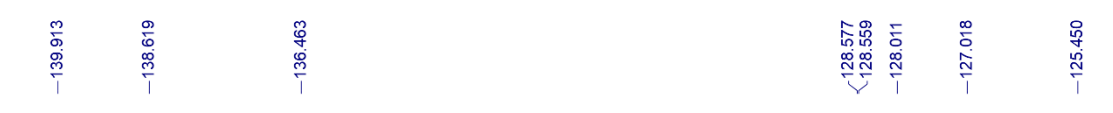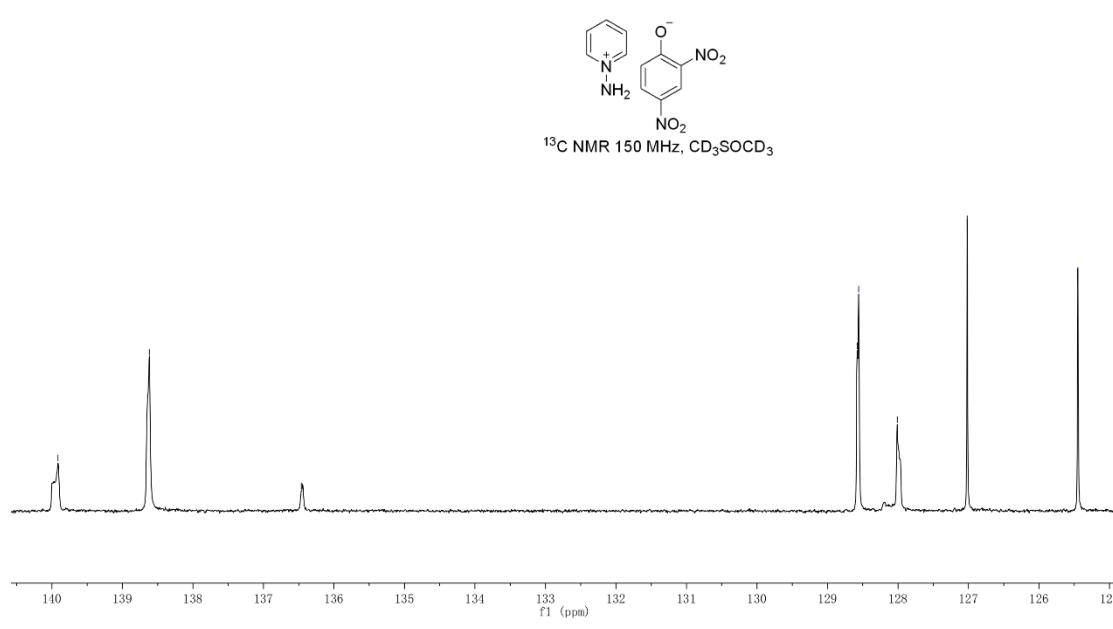

NMR copies of compound **1c**:

9.045  
8.661  
8.422  
8.404  
8.385  
8.127  
8.094  
8.075  
8.054  
8.032  
7.862  
7.837  
7.798  
7.778  
7.639  
6.431  
6.411

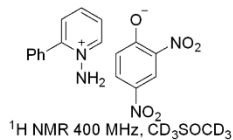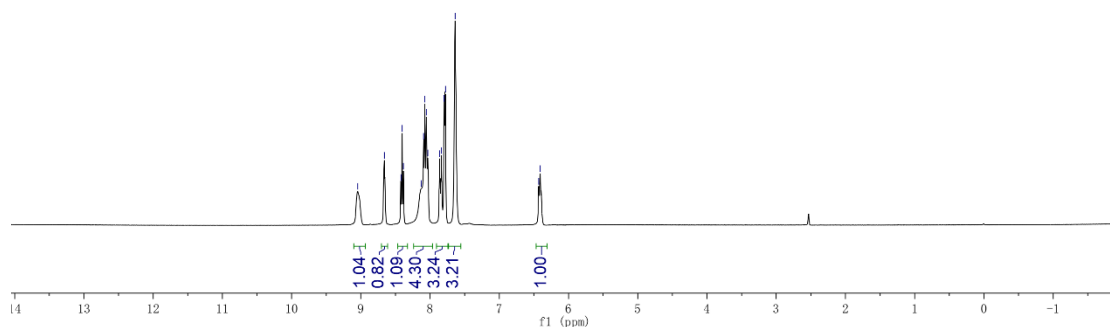

9.045  
8.661  
8.422  
8.404  
8.385  
8.127  
8.094  
8.075  
8.054  
8.032  
7.862  
7.837  
7.798  
7.778  
7.639  
6.431  
6.411

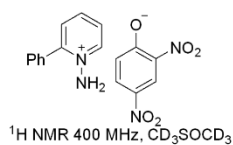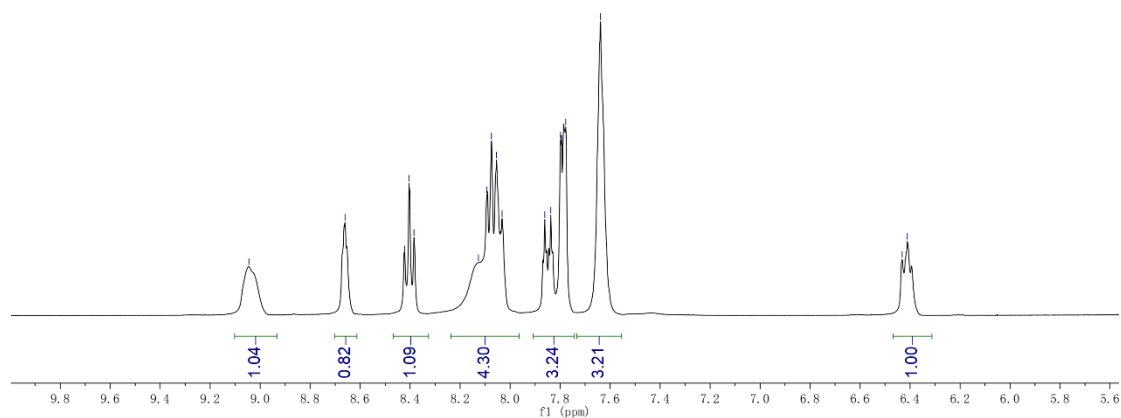

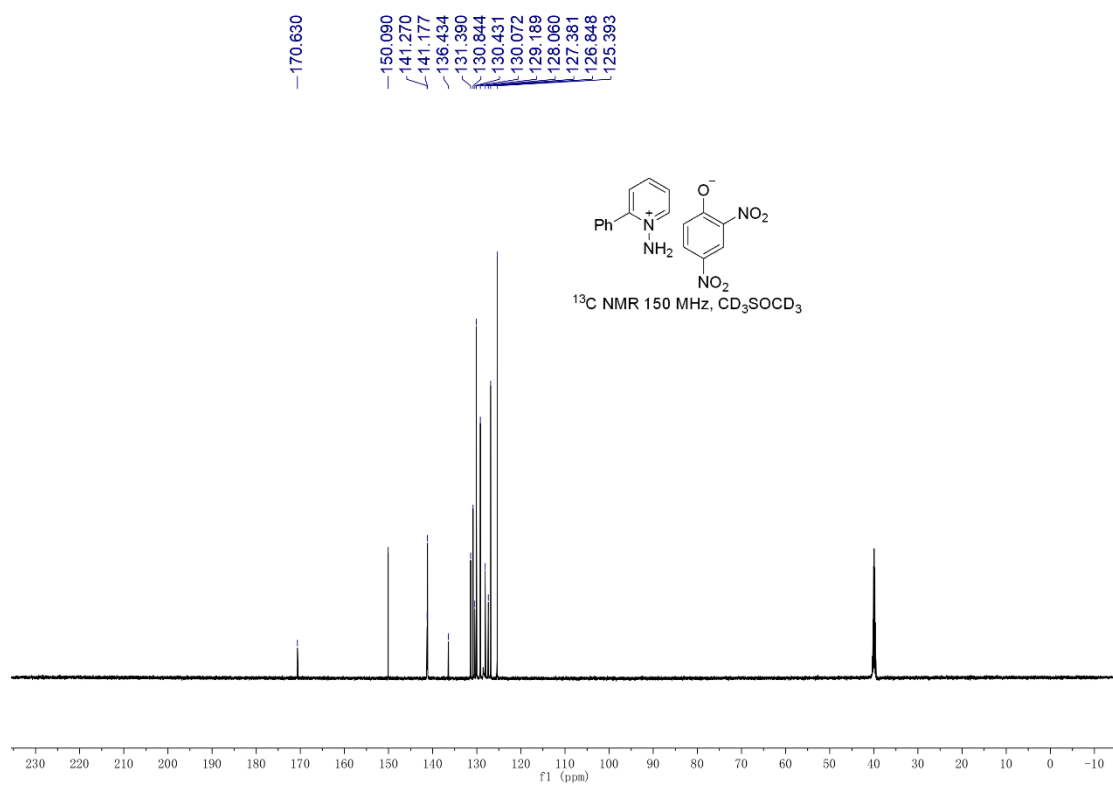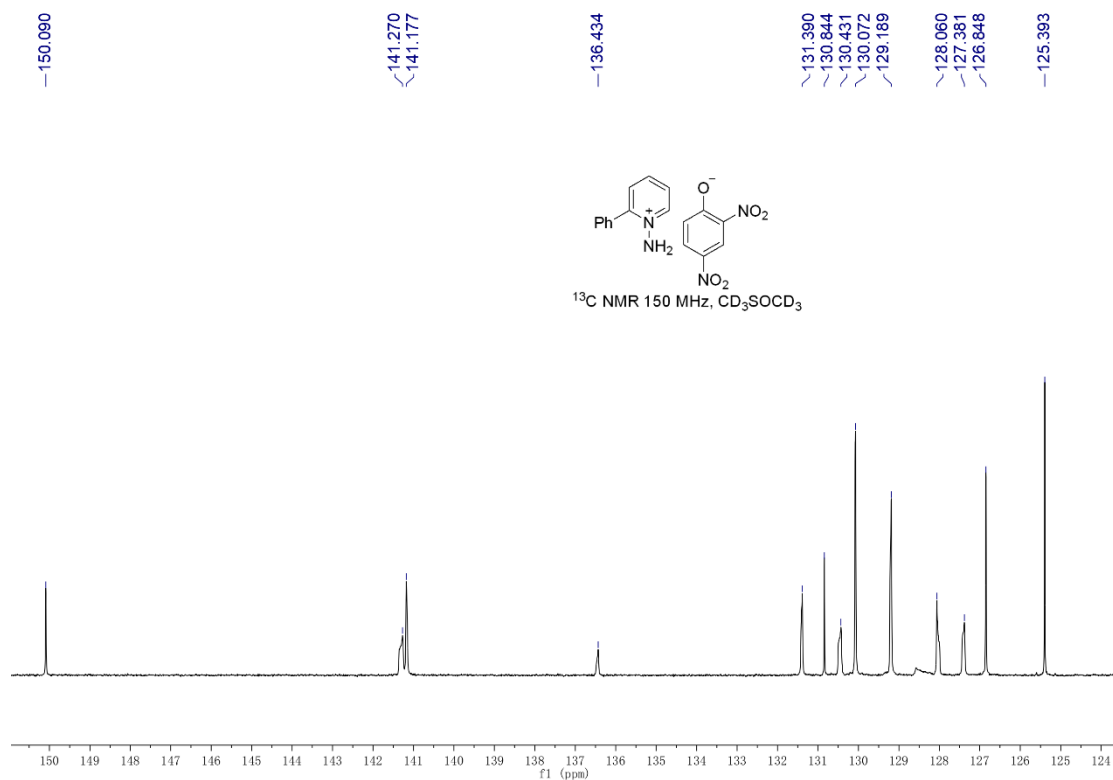

NMR copies of compound **1e**:

9.182  
8.812  
8.704  
8.635  
8.592  
8.568  
8.112  
8.092  
8.076  
7.825  
7.812  
7.805  
7.612  
7.594  
7.580  
6.412  
6.387

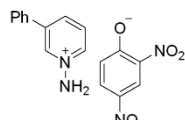

<sup>1</sup>H NMR, 400 MHz, CD<sub>3</sub>SOCD<sub>3</sub>

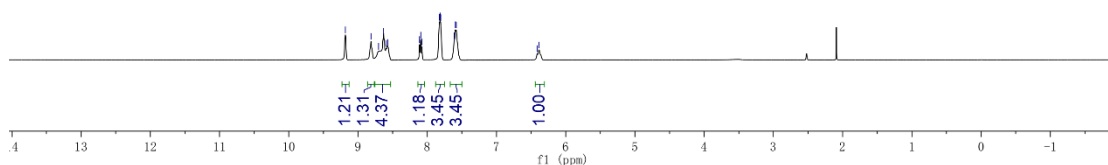

9.182  
8.812  
8.704  
8.635  
8.592  
8.568  
8.112  
8.092  
8.076  
7.825  
7.812  
7.805  
7.612  
7.594  
7.580  
6.412  
6.387

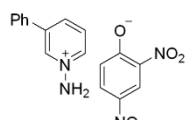

<sup>1</sup>H NMR, 400 MHz, CD<sub>3</sub>SOCD<sub>3</sub>

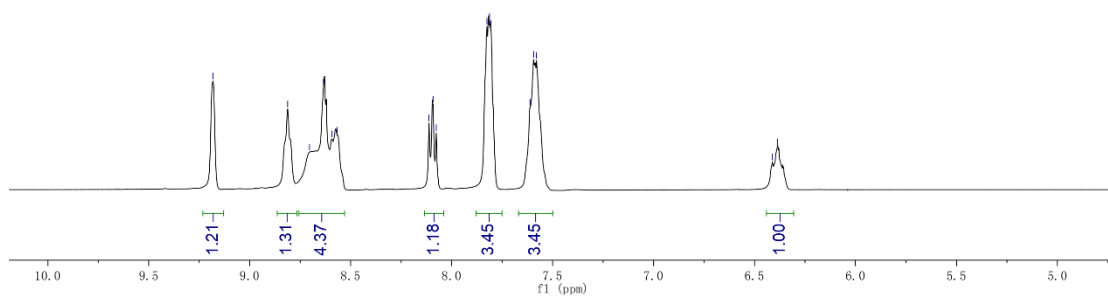

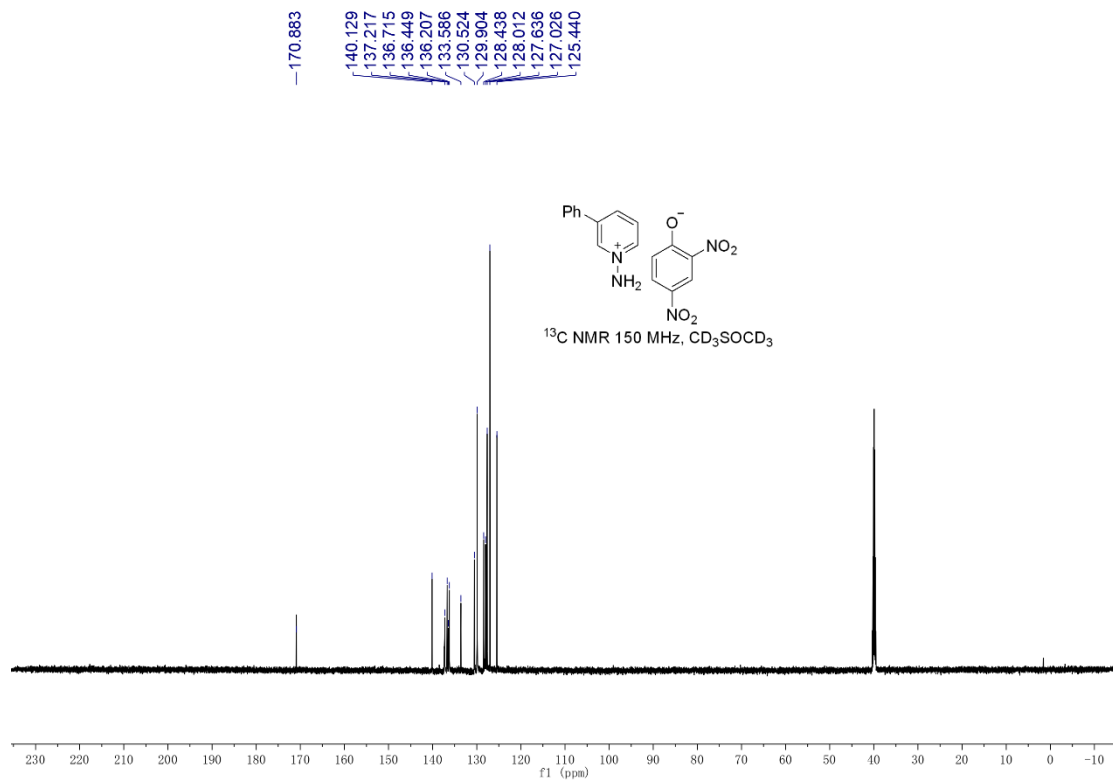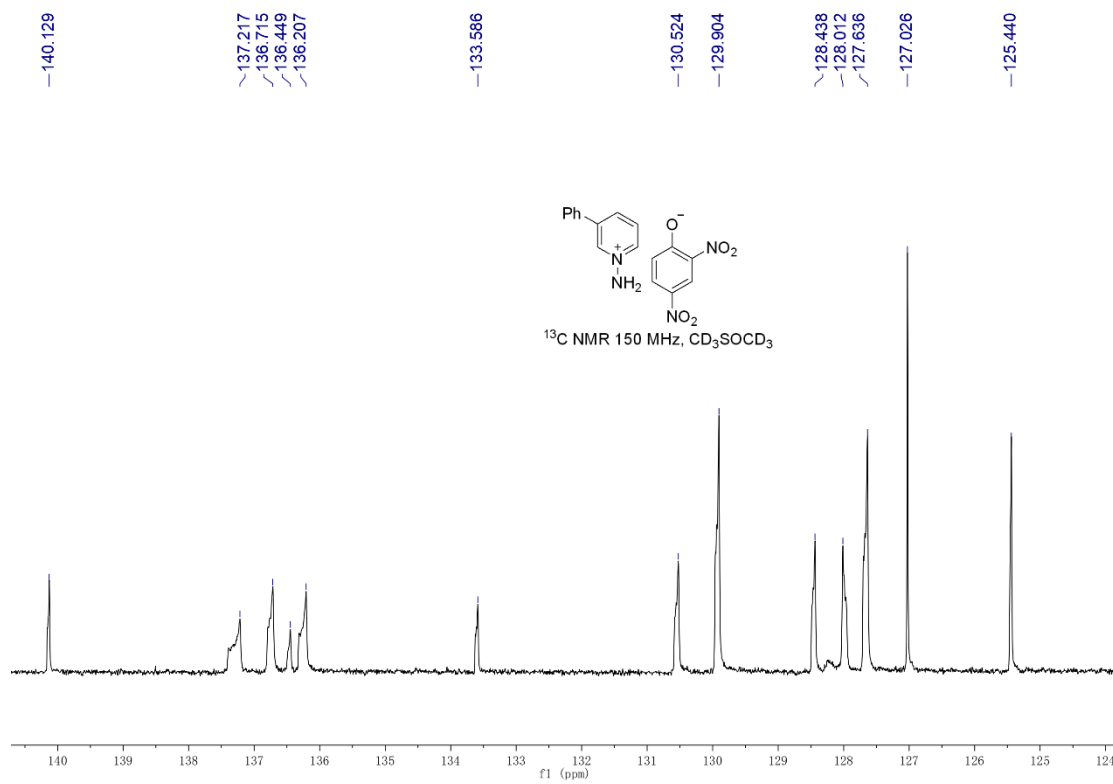



NMR copies of compound **1i**:

8.831  
8.813  
8.621  
8.613  
8.471  
8.383  
8.365  
7.992  
7.983  
7.974  
7.968  
7.860  
7.852  
7.835  
7.827  
7.629  
7.620  
7.613  
6.439  
6.414

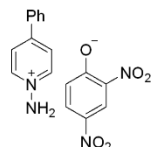

<sup>1</sup>H NMR, 400 MHz, CD<sub>3</sub>SOCD<sub>3</sub>

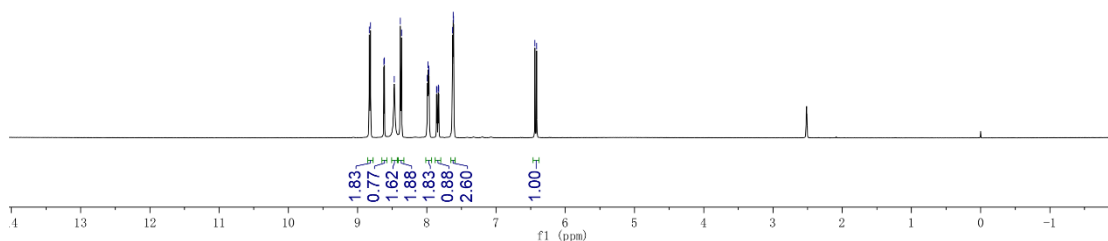

8.831  
8.813  
8.621  
8.613  
8.471  
8.383  
8.365  
7.992  
7.983  
7.974  
7.968  
7.860  
7.852  
7.835  
7.827  
7.629  
7.620  
7.613  
6.439  
6.414

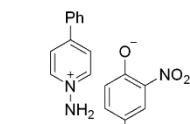

<sup>1</sup>H NMR, 400 MHz, CD<sub>3</sub>SOCD<sub>3</sub>

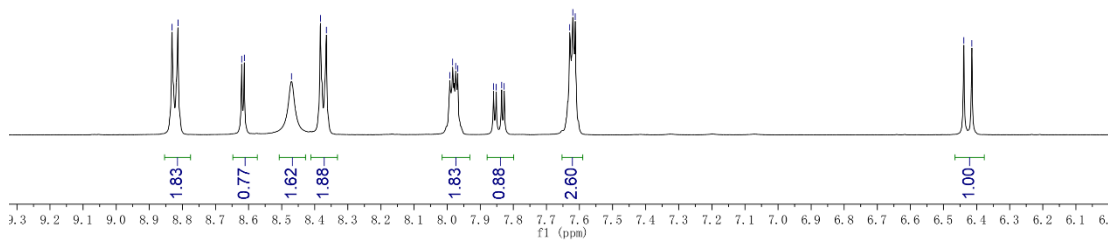

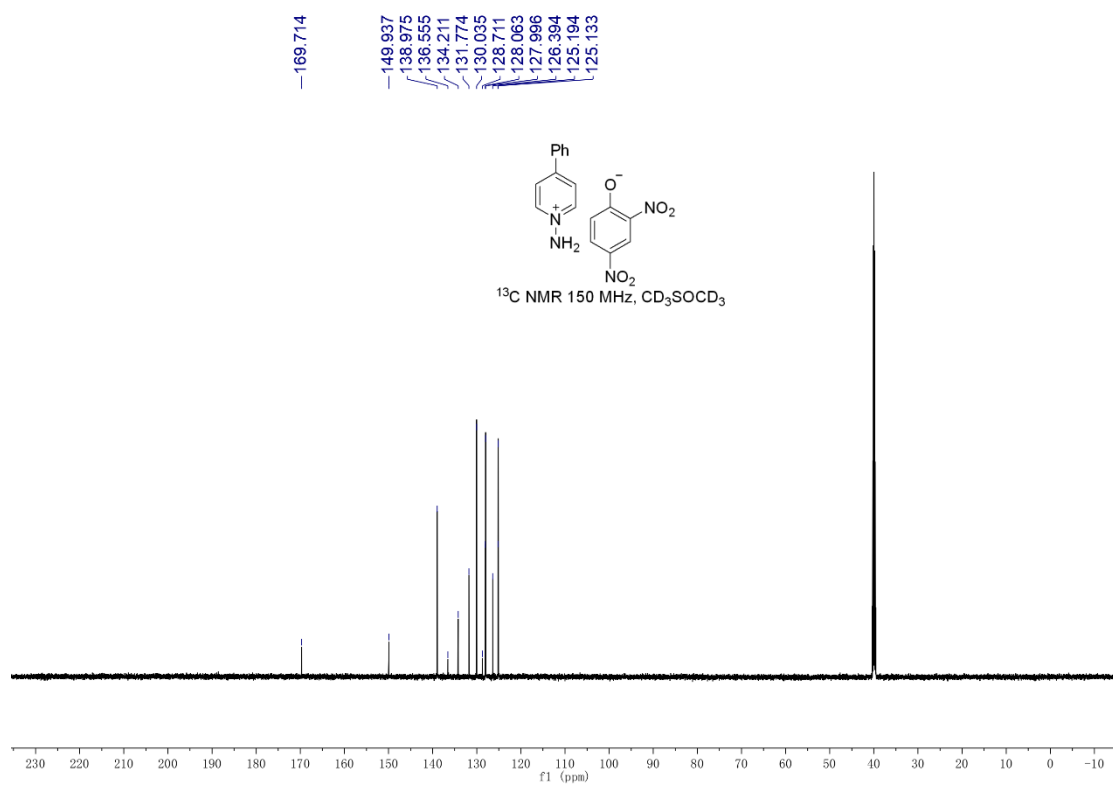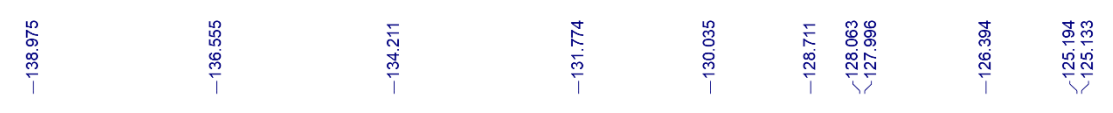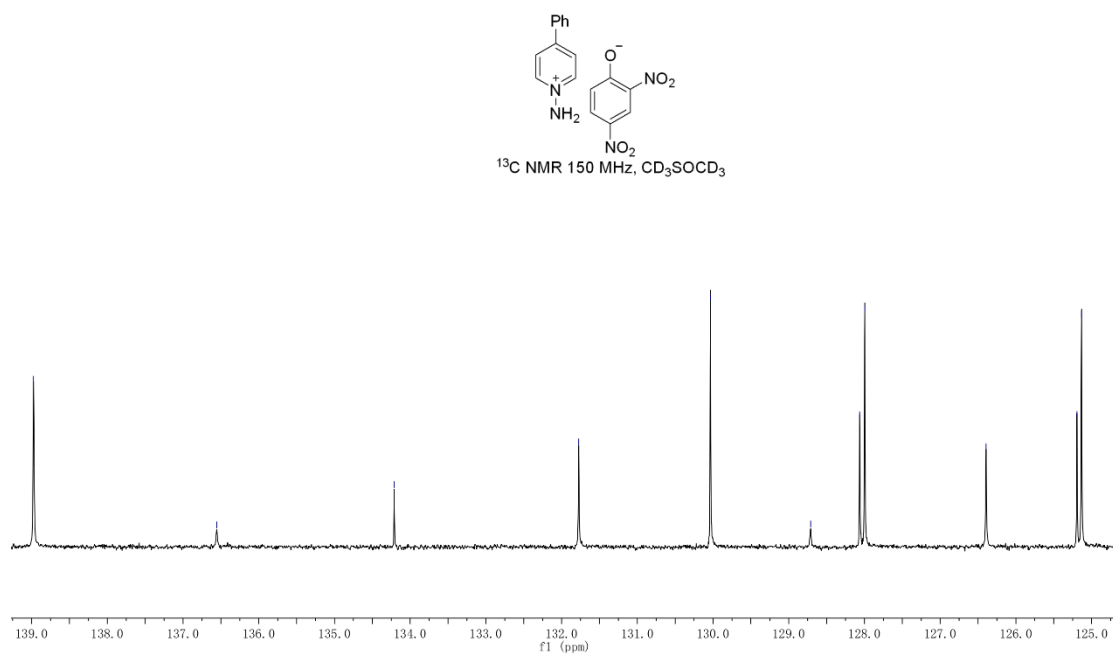

NMR copies of compound **1j**:

8.730  
8.714  
8.613  
8.605  
8.117  
8.098  
7.820  
7.812  
7.796  
7.788  
7.778  
7.760  
7.742  
6.371  
6.346  
2.656  
2.470

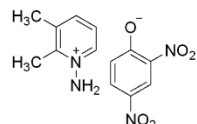

<sup>1</sup>H NMR 400MHz, CD<sub>3</sub>SOCD<sub>3</sub>

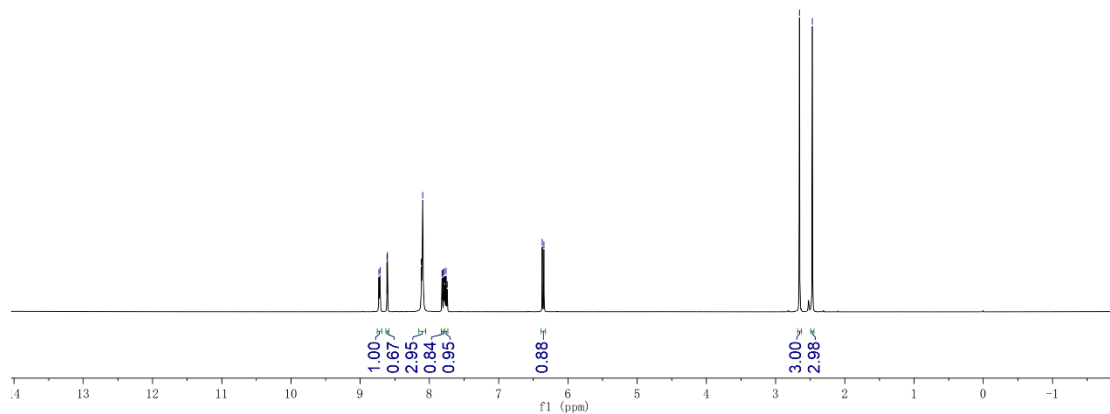

8.730  
8.714  
8.613  
8.605  
8.117  
8.098  
7.820  
7.812  
7.796  
7.788  
7.778  
7.760  
7.742  
6.371  
6.346

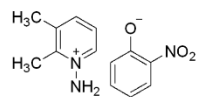

<sup>1</sup>H NMR 400MHz, CD<sub>3</sub>SOCD<sub>3</sub>

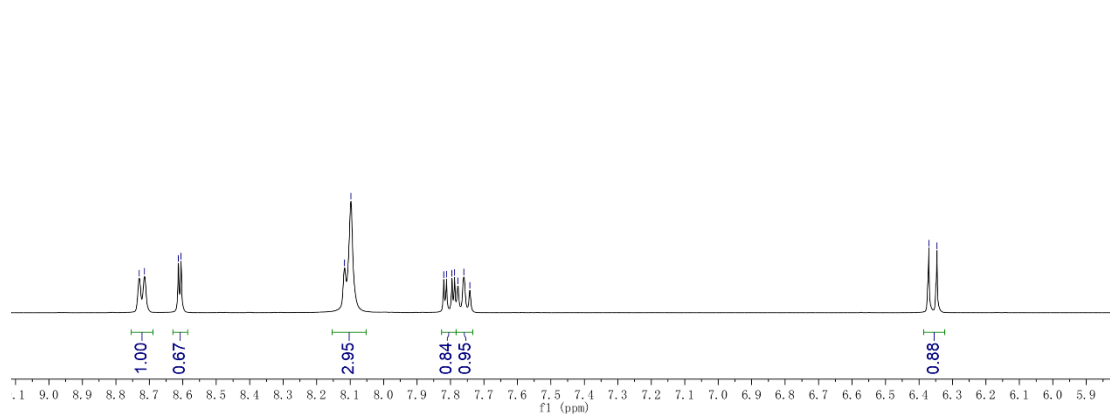

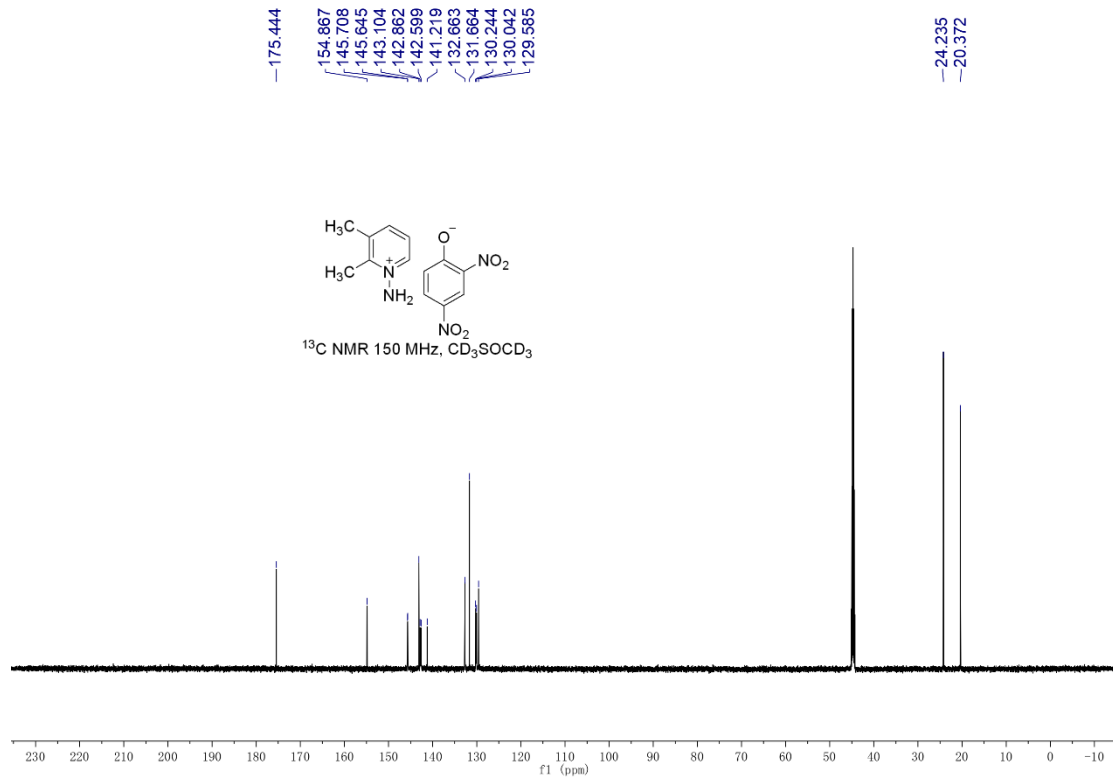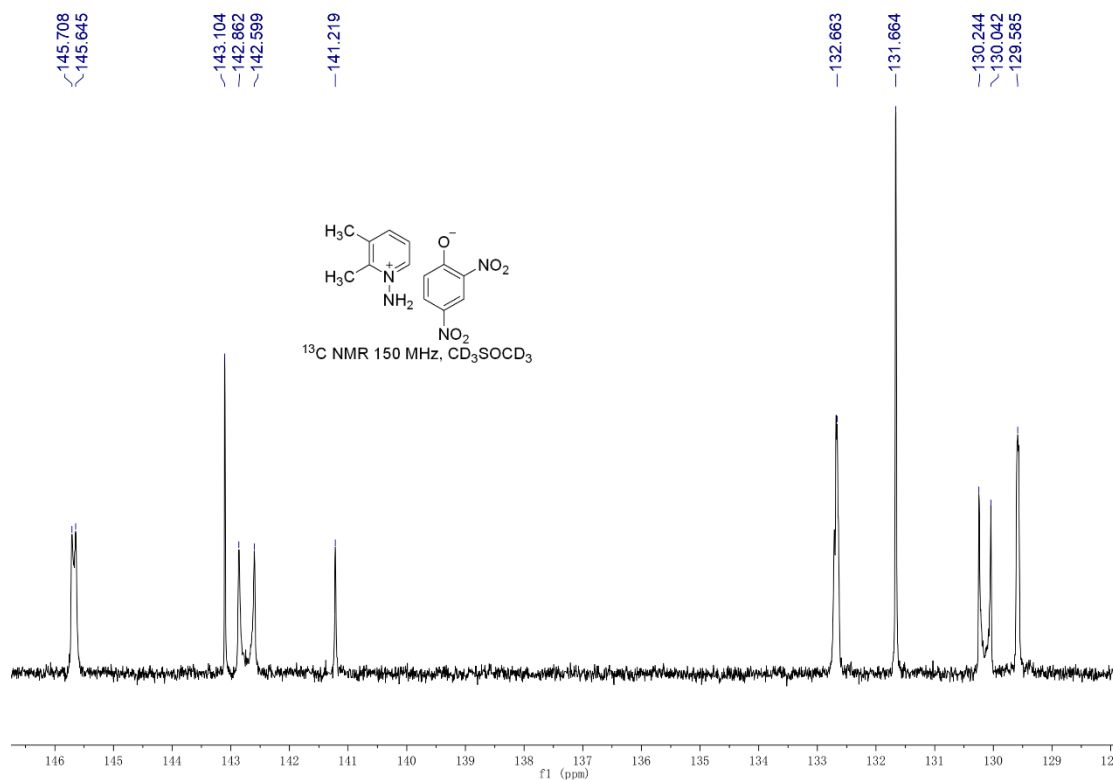

NMR copies of compound **1o**:

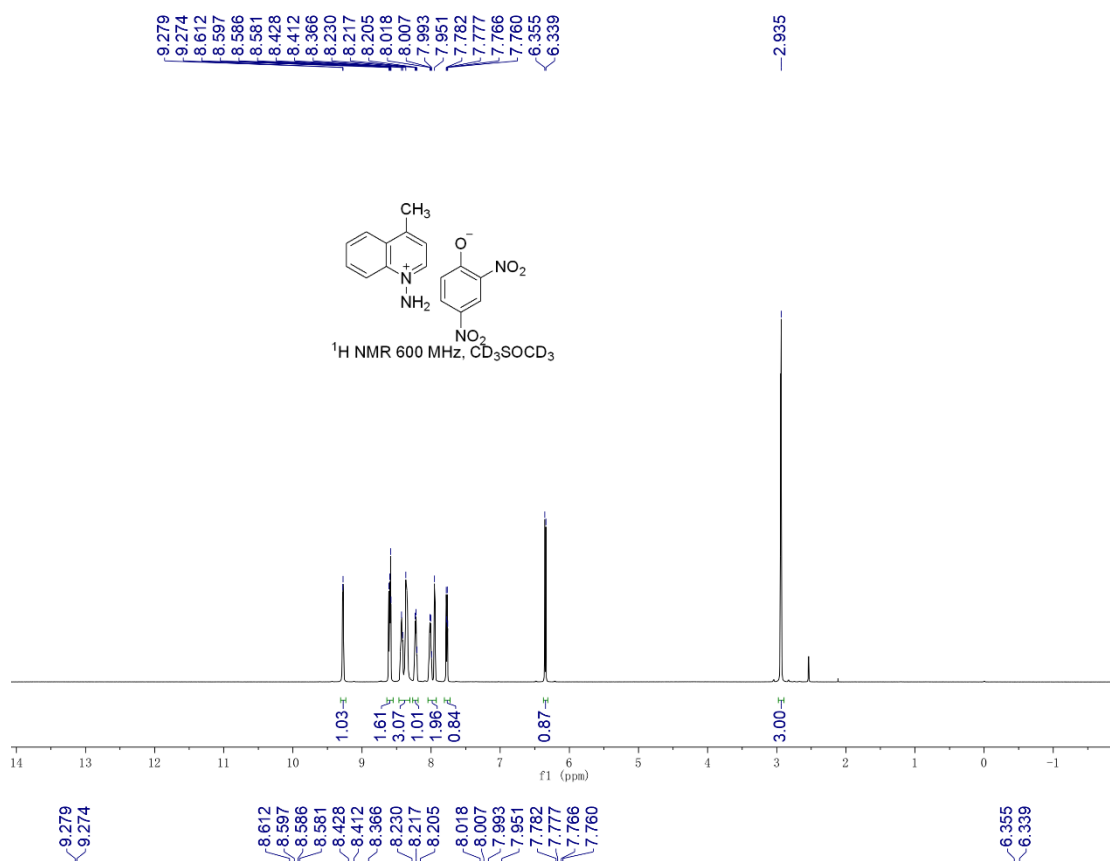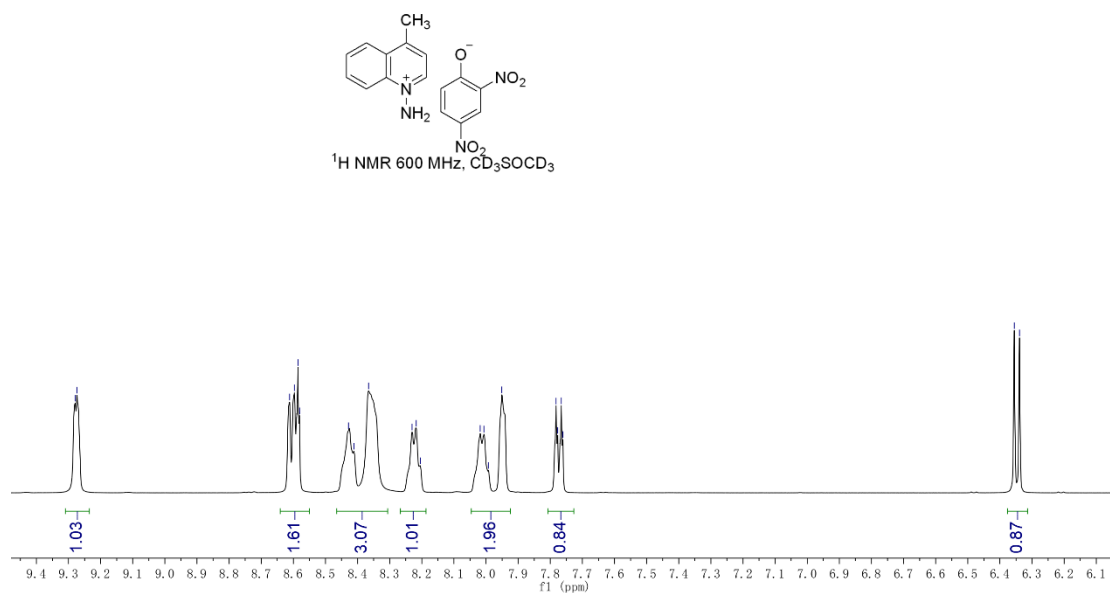

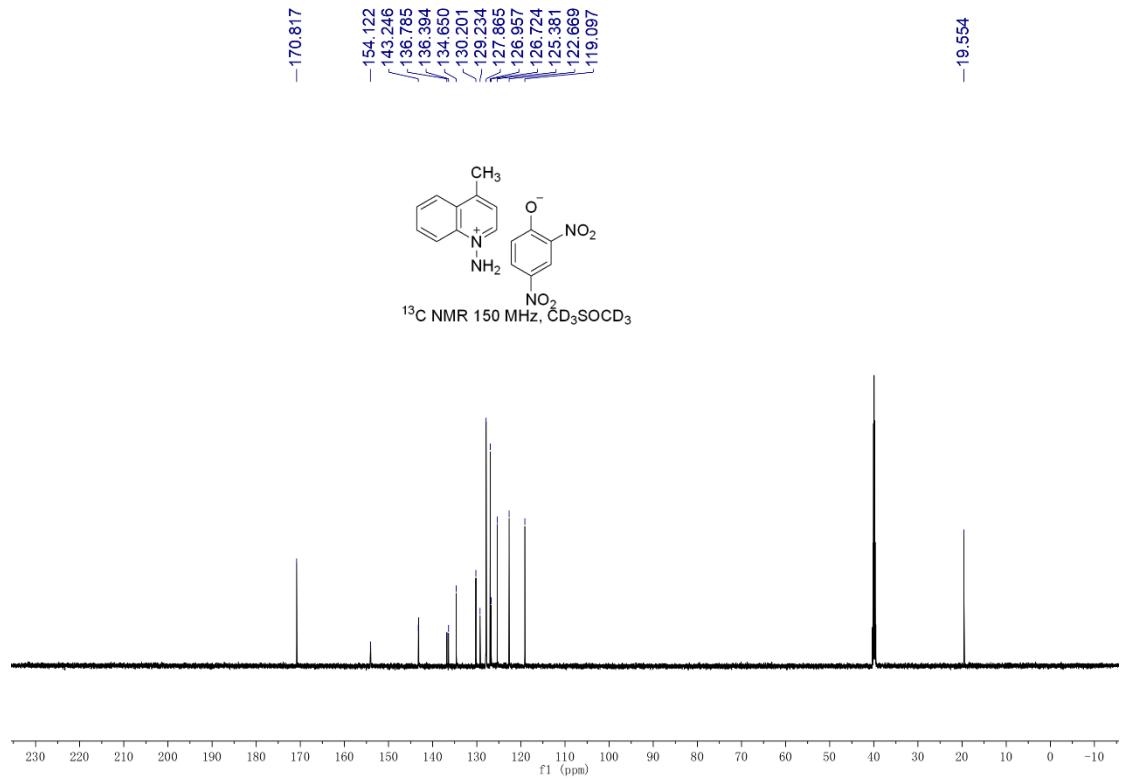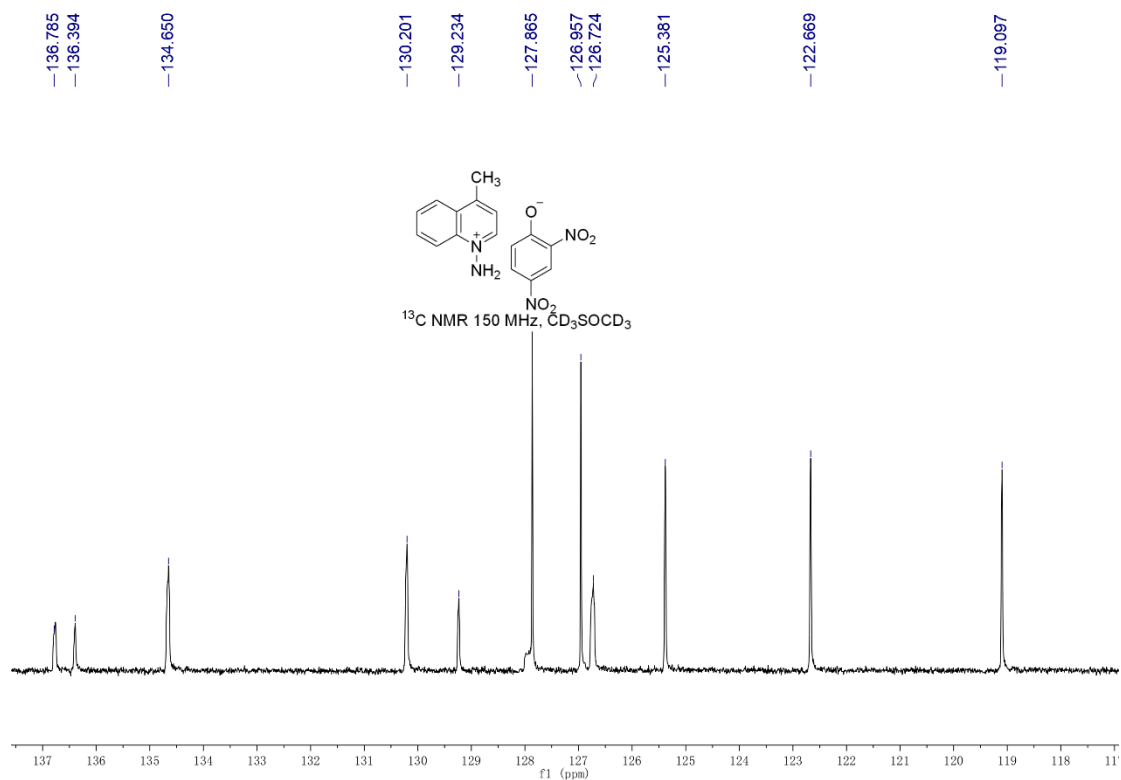

NMR copies of compound **1q**:

9.757  
8.779  
8.748  
8.716  
8.644  
8.636  
8.531  
8.522  
8.467  
8.447  
8.428  
8.328  
8.307  
8.281  
8.149  
8.131  
8.099  
8.030  
8.015  
7.990  
7.849  
7.841  
7.825  
7.817  
6.433  
6.413

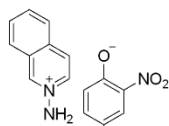

<sup>1</sup>H NMR 400 MHz, CD<sub>3</sub>SOCD<sub>3</sub>

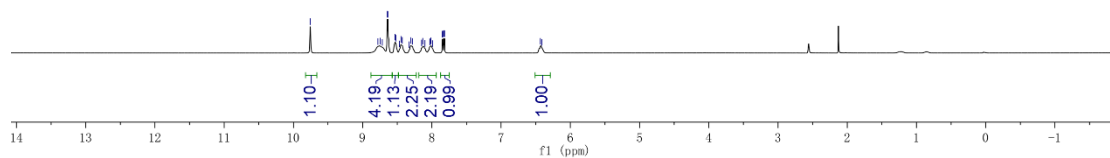

9.757  
8.779  
8.748  
8.716  
8.644  
8.636  
8.531  
8.522  
8.467  
8.447  
8.428  
8.328  
8.307  
8.281  
8.149  
8.131  
8.099  
8.030  
8.015  
7.990  
7.849  
7.841  
7.825  
7.817  
6.433  
6.413

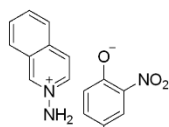

<sup>1</sup>H NMR 400 MHz, CD<sub>3</sub>SOCD<sub>3</sub>

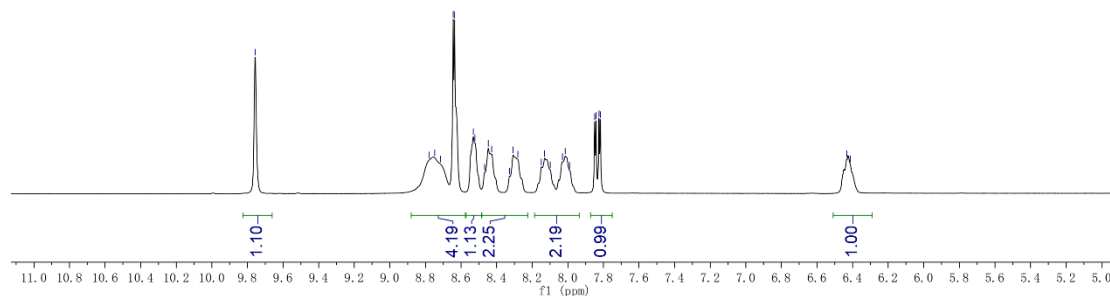

-170.716  
 140.901  
 136.444  
 134.987  
 134.277  
 132.138  
 131.421  
 129.302  
 127.991  
 127.782  
 127.623  
 126.911  
 126.703  
 125.372

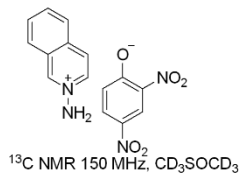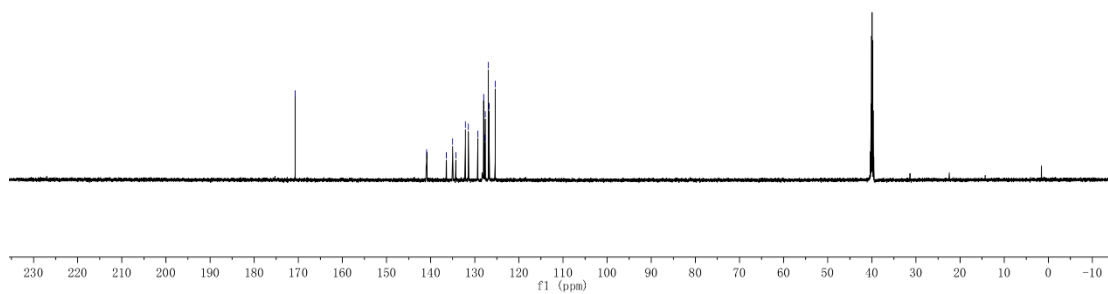

-140.901  
 -136.444  
 -134.987  
 -134.277  
 -132.138  
 -131.421  
 -129.302  
 -127.991  
 -127.782  
 -127.623  
 -126.911  
 -126.703  
 -125.372

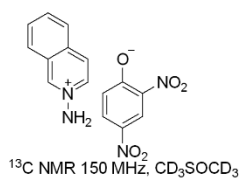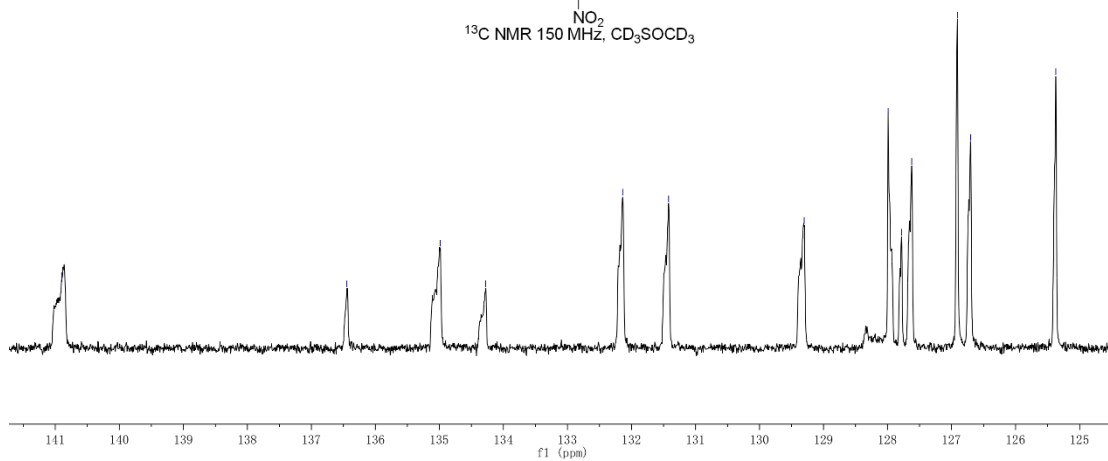



## 2.4. The synthesis of compounds **2** according to the following procedure **2**

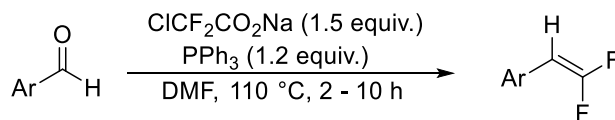

ClCF<sub>2</sub>CO<sub>2</sub>Na (1.2 equiv., 12.0 mmol) in 50 mL DMF was added slowly to the mixture of corresponding aldehyde (10.0 mmol) and PPh<sub>3</sub> (1.5 equiv., 15.0 mmol) in DMF (40 mL) at 110 °C, the reaction was heated at 110 °C and kept at this temperature until no further evolution of CO<sub>2</sub> was observed. The reaction mixture was cool to room temperature then water (50 mL) was added to the reaction slowly and the mixture was extracted with EtOAc (3 × 15 mL). The combined organic layer was dried over Na<sub>2</sub>SO<sub>4</sub>, filtered, and concentrated in vacuo. The residue was purified by flash column chromatography to afford the difluoroalkenes.

## 2.5. Characterization data of some starting materials **2**

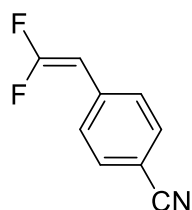

### 4-(2,2-difluorovinyl)benzonitrile (**2a**)

Purification by flash column chromatography on silica gel (EA/n-hexane = 1:50), white solid; Yield = 1.04 g (63%); mp 56 - 58 °C. <sup>1</sup>H NMR (400 MHz, CDCl<sub>3</sub>), δ: 7.62 (d, *J* = 8.4 Hz, 2H), 7.43 (d, *J* = 8.4 Hz, 2H), 5.34 (dd, *J* = 25.6, 3.2 Hz, 1H). <sup>19</sup>F NMR (376 MHz, CDCl<sub>3</sub>), δ: -77.90 (dd, *J* = 25.2, 21.4 Hz), -79.55 (d, *J* = 20.3 Hz). <sup>13</sup>C NMR (150 MHz, CDCl<sub>3</sub>), δ: 157.0 (dd, *J* = 299.5, 290.5 Hz), 135.3 (dd, *J* = 7.5, 6.6 Hz), 132.4, 128.0 (dd, *J* = 6.9, 3.6 Hz), 118.6, 110.5, 81.8 (dd, *J* = 30.3, 12.7 Hz). HRMS (ESI): Calcd for C<sub>9</sub>H<sub>6</sub>F<sub>2</sub>N<sup>+</sup> *m/z* 166.0463 [M+H]<sup>+</sup>, found 166.0464.

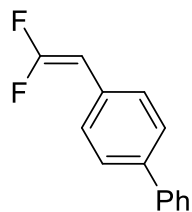

#### 4-(2,2-difluorovinyl)-1,1'-biphenyl (2f)

Purification by flash column chromatography on silica gel (n-hexane), white solid; Yield = 1.64 g (76%); mp 77 - 79 °C. **<sup>1</sup>H NMR** (400 MHz, CDCl<sub>3</sub>),  $\delta$ : 7.59 - 7.55 (m, 4H), 7.48 - 7.29 (m, 5H), 5.29 (dd,  $J = 26.4, 3.6$  Hz, 1H). **<sup>19</sup>F NMR** (376 MHz, CDCl<sub>3</sub>),  $\delta$ : -81.89 (dd,  $J = 30.8, 26.3$  Hz), -83.81 (dd,  $J = 30.4, 3.4$  Hz). **<sup>13</sup>C NMR** (150 MHz, CDCl<sub>3</sub>),  $\delta$ : 156.4 (dd,  $J = 296.7, 286.9$  Hz), 140.5, 139.8 (t,  $J = 2.1$  Hz), 129.4 (t,  $J = 6.4$  Hz), 128.8, 128.0 (dd,  $J = 6.3, 3.6$  Hz), 127.4, 127.3, 127.0, 81.9 (dd,  $J = 28.9, 13.3$  Hz). **HRMS** (ESI): Calcd for C<sub>14</sub>H<sub>11</sub>F<sub>2</sub><sup>+</sup> m/z 217.0823 [M+H]<sup>+</sup>, found 217.0827.

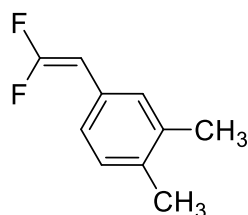

#### 4-(2,2-difluorovinyl)-1,2-dimethylbenzene (2m)

Purification by flash column chromatography on silica gel (n-hexane), Colorless oil; Yield = 1.39 g (83%). **<sup>1</sup>H NMR** (400 MHz, CDCl<sub>3</sub>),  $\delta$ : 7.14 - 6.98 (m, 3H), 5.18 (dd,  $J = 26.4, 4.0$  Hz, 1H), 2.23 (s, 6H). **<sup>19</sup>F NMR** (376 MHz, CDCl<sub>3</sub>),  $\delta$ : -83.24 (dd,  $J = 34.2, 26.7$  Hz), -83.39 (dd,  $J = 34.2, 3.8$  Hz). **<sup>13</sup>C NMR** (150 MHz, CDCl<sub>3</sub>),  $\delta$ : 156.1 (dd,  $J = 295.9, 285.6$  Hz), 136.8, 135.5 (t,  $J = 1.8$  Hz), 129.9, 128.8 (dd,  $J = 5.2, 3.6$  Hz), 127.8 (t,  $J = 6.4$  Hz), 125.0 (dd,  $J = 5.8, 2.8$  Hz), 81.9 (dd,  $J = 28.6, 13.8$  Hz), 19.7, 19.4. **HRMS** (ESI): Calcd for C<sub>10</sub>H<sub>11</sub>F<sub>2</sub><sup>+</sup> m/z 169.0823 [M+H]<sup>+</sup>, found 169.0825.

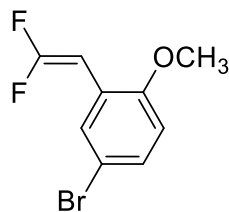

#### 4-bromo-2-(2,2-difluorovinyl)-1-methoxybenzene (2o)

Purification by flash column chromatography on silica gel (n-hexane), Colorless oil; Yield = 1.93 g (78%). **<sup>1</sup>H NMR** (400 MHz, CDCl<sub>3</sub>),  $\delta$ : 7.54 (s, 1H), 7.27 (d,  $J$  = 8.4 Hz, 1H), 6.69 (d,  $J$  = 8.4 Hz, 1H), 5.59 (d,  $J$  = 26.4 Hz, 1H), 3.78 (s, 3H). **<sup>19</sup>F NMR** (376 MHz, CDCl<sub>3</sub>),  $\delta$ : -81.28 (d,  $J$  = 27.8 Hz), -81.52 (t,  $J$  = 26.7 Hz). **<sup>13</sup>C NMR** (150 MHz, CDCl<sub>3</sub>),  $\delta$ : 156.4 (dd,  $J$  = 296.5, 286.8 Hz), 155.2 (dd,  $J$  = 4.6, 1.5 Hz), 130.7 (dd,  $J$  = 2.7, 1.3 Hz), 130.7, 121.3, 112.9, 112.1, 75.6 (dd,  $J$  = 31.8, 12.1 Hz), 55.7. **HRMS** (ESI): Calcd for C<sub>9</sub>H<sub>8</sub>F<sub>2</sub>OBr<sup>+</sup> m/z 248.9721 [M+H]<sup>+</sup>, found 248.9721.

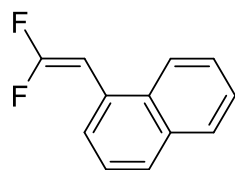

#### 1-(2,2-difluorovinyl)naphthalene (2q)

Purification by flash column chromatography on silica gel (n-hexane), Colorless oil; Yield = 1.25 g (66%). **<sup>1</sup>H NMR** (400 MHz, CDCl<sub>3</sub>),  $\delta$ : 8.08 - 6.96 (m, 7H), 5.74 (d,  $J$  = 21.2 Hz, 1H). **<sup>19</sup>F NMR** (376 MHz, CDCl<sub>3</sub>),  $\delta$ : -82.78 (d,  $J$  = 29.3 Hz), -84.62 (t,  $J$  = 27.4 Hz). **<sup>13</sup>C NMR** (150 MHz, CDCl<sub>3</sub>),  $\delta$ : 156.9 (dd,  $J$  = 294.6, 286.8 Hz), 133.8, 131.6 (d,  $J$  = 3.4 Hz), 128.8, 128.1, 126.7, 126.6 (dd,  $J$  = 6.6, 1.6 Hz), 126.5, 126.1, 125.6, 123.8, 78.8 (dd,  $J$  = 28.9, 15.4 Hz). **HRMS** (ESI): Calcd for C<sub>12</sub>H<sub>9</sub>F<sub>2</sub><sup>+</sup> m/z 191.0667 [M+H]<sup>+</sup>, found 191.0666.

## 2.6. NMR and HRMS spectra copies of some starting materials 2

NMR copies of compound **2a**:

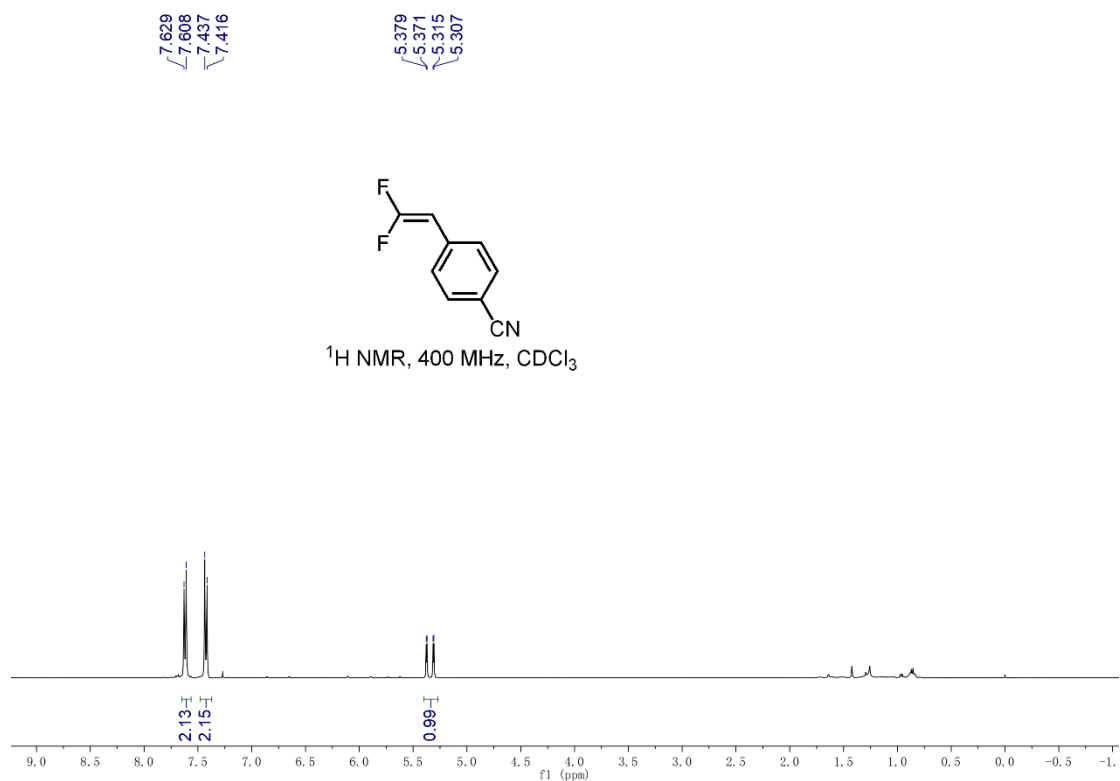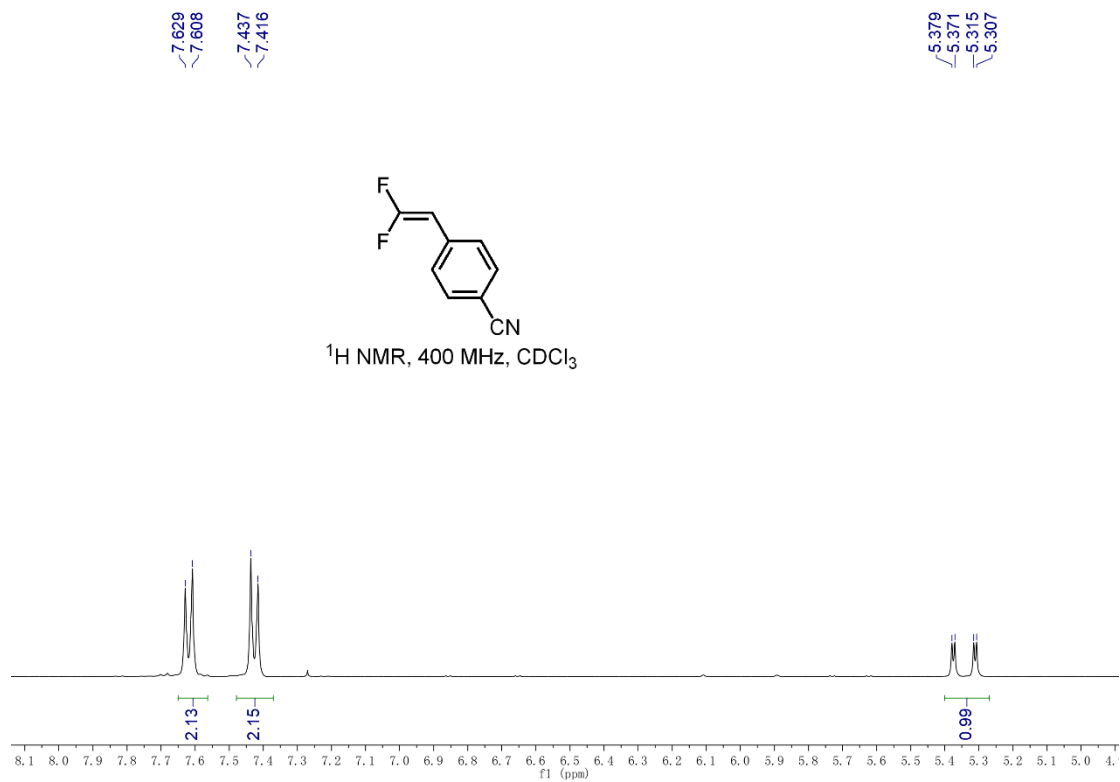

77.842  
77.899  
77.909  
77.964  
79.522  
79.576

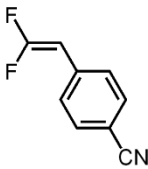

$^{19}\text{F}$  NMR, 376 MHz,  $\text{CDCl}_3$

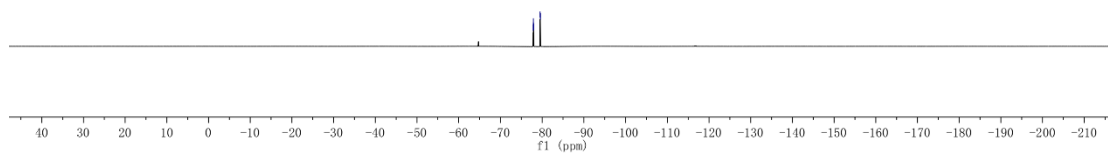

77.842  
77.899  
77.909  
77.964

79.522  
79.576

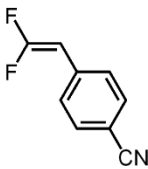

$^{19}\text{F}$  NMR, 376 MHz,  $\text{CDCl}_3$

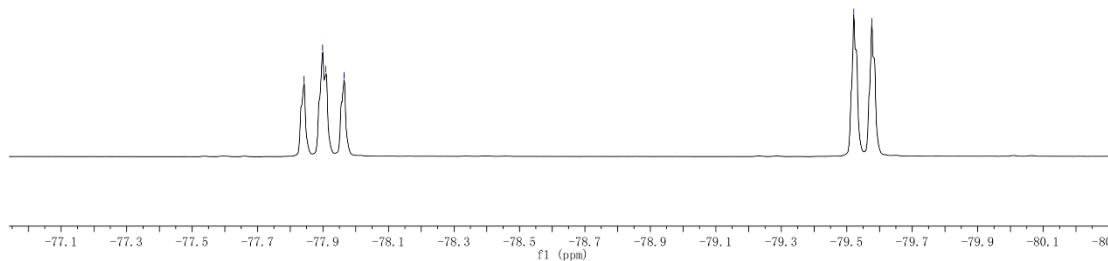

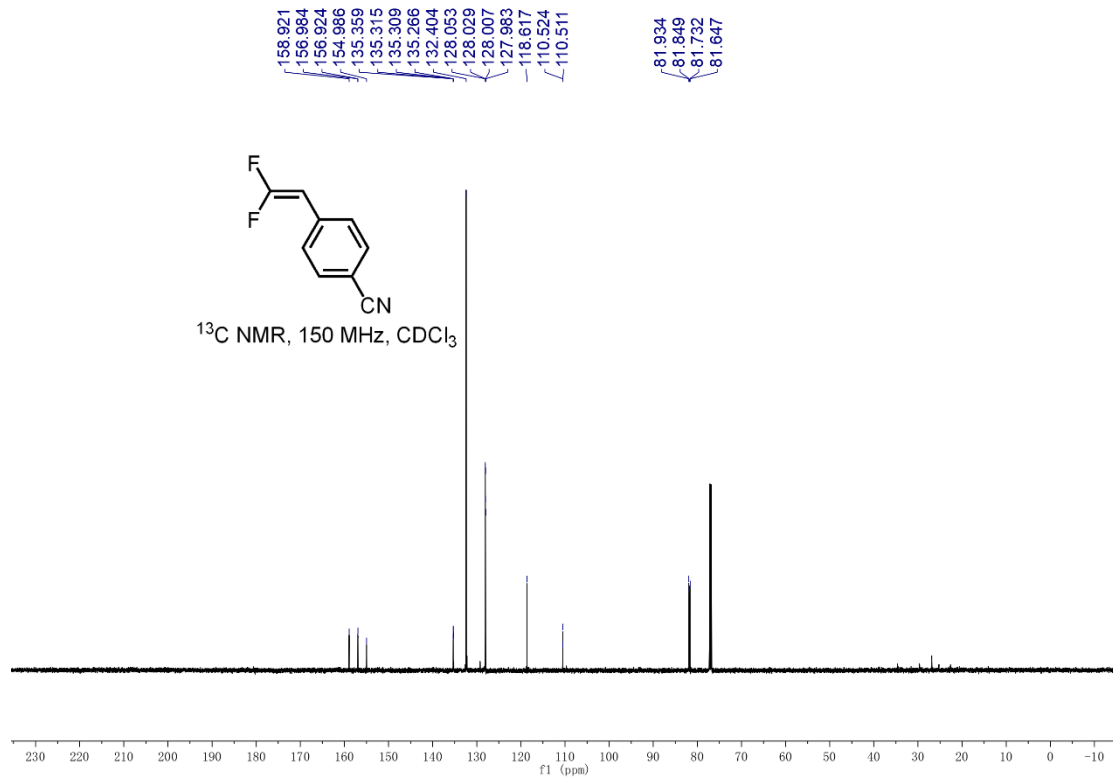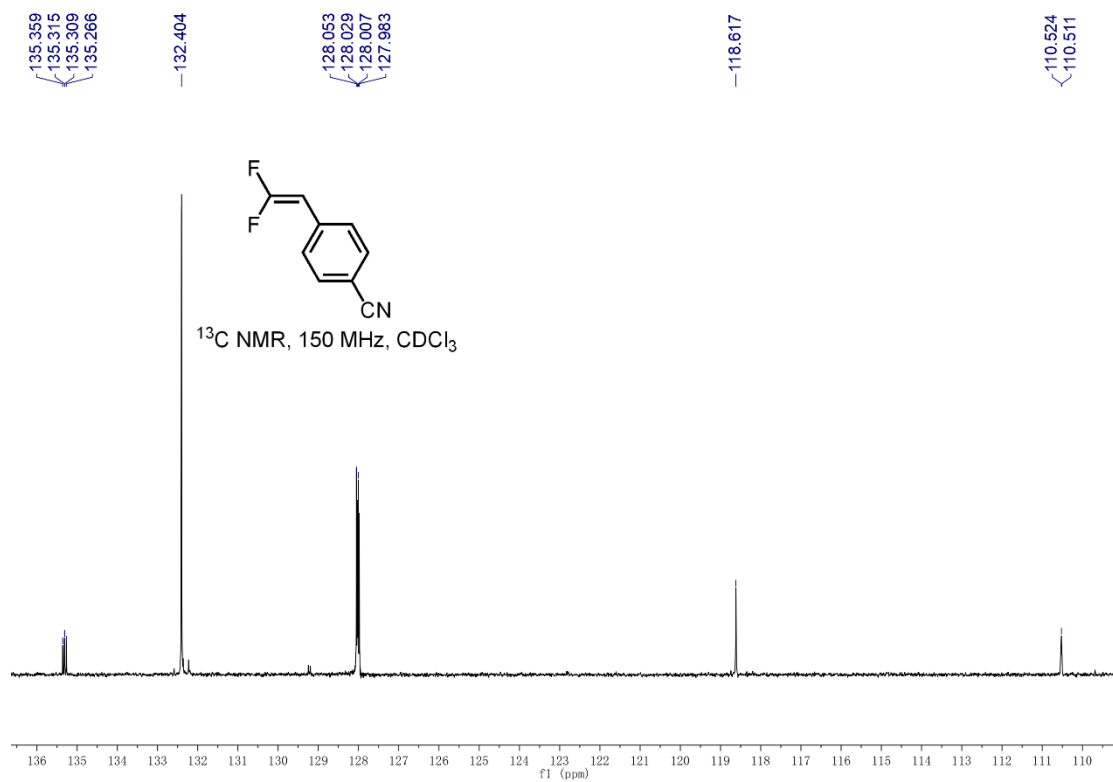

—158.921

—156.984  
—156.924

—154.986

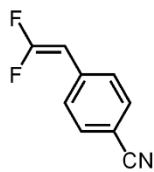

$^{13}\text{C}$  NMR, 150 MHz,  $\text{CDCl}_3$

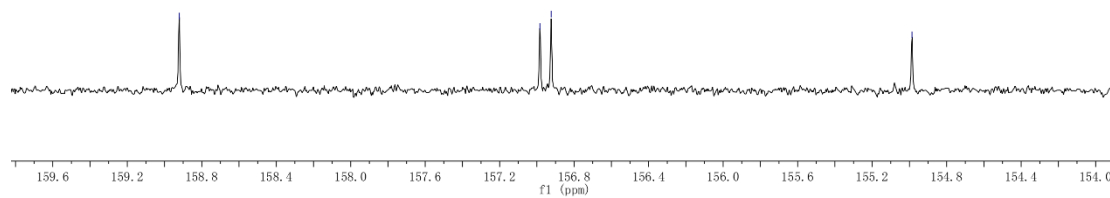

HRMS (ESI) copy of compound **2a**:

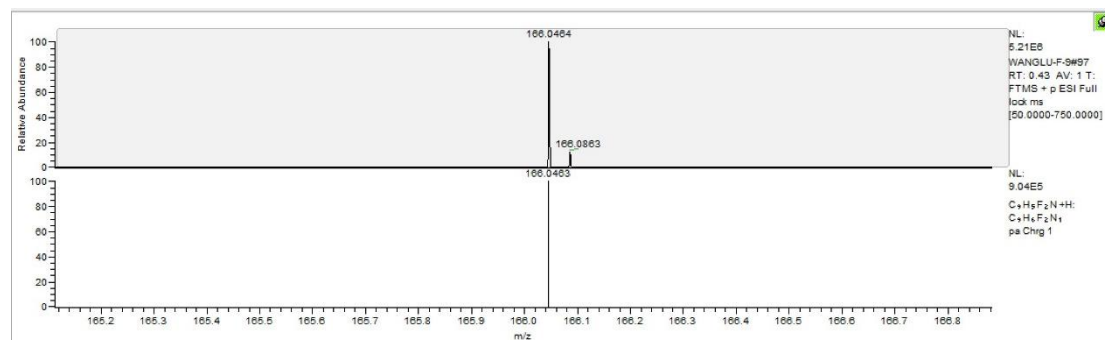

NMR copies of compound **2f**:

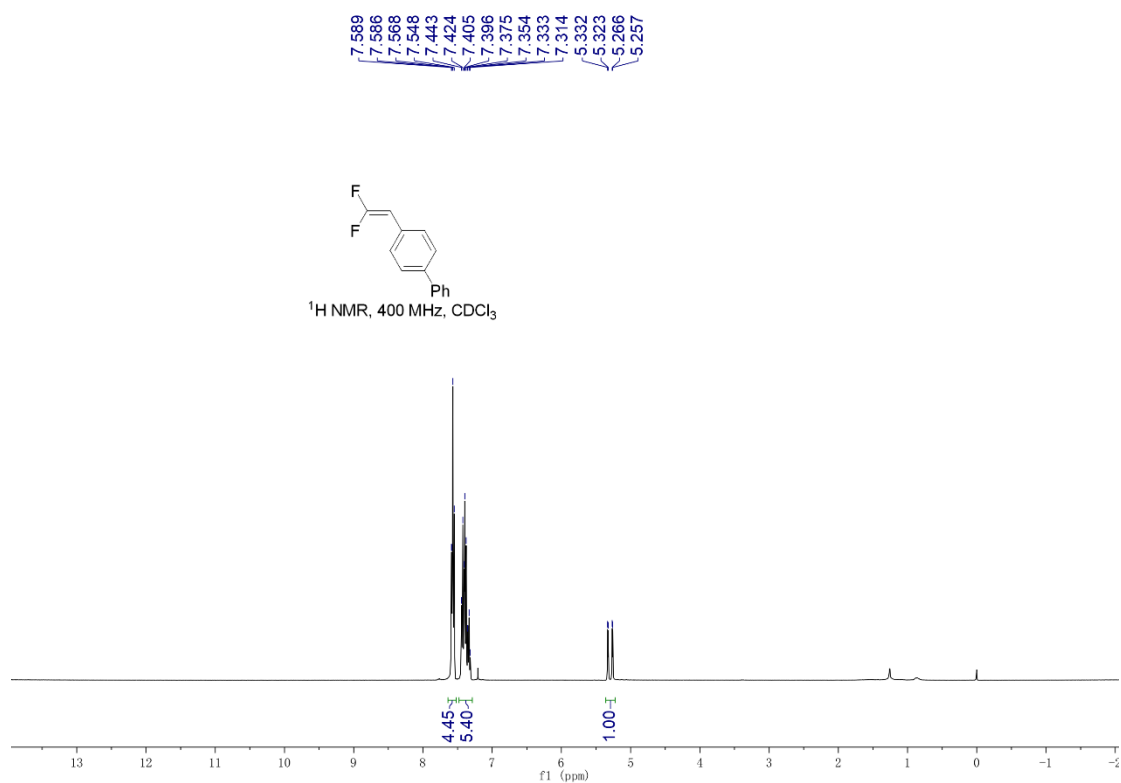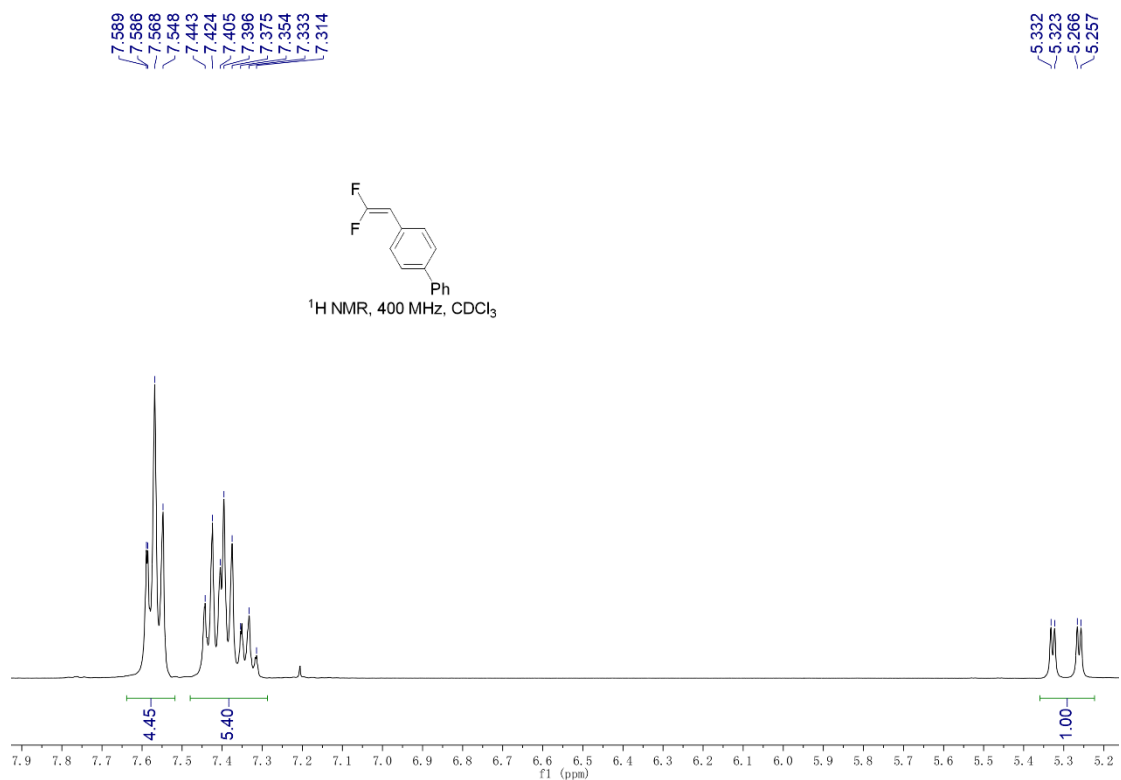



81.817  
81.887  
81.899  
81.969  
83.768  
83.777  
83.849  
83.859

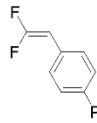

<sup>19</sup>F NMR, 376 MHz, CDCl<sub>3</sub>

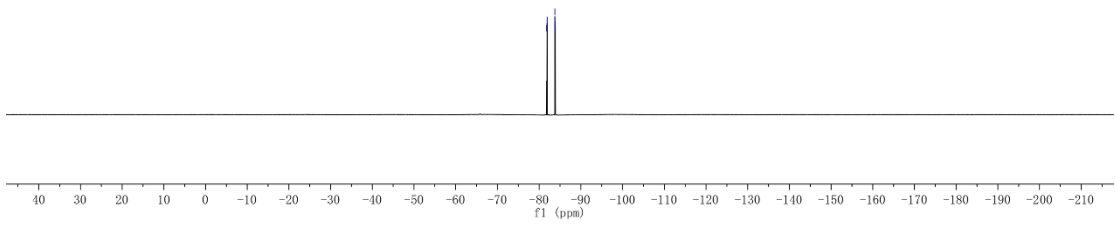

81.817  
81.887  
81.899  
81.969

83.768  
83.777  
83.849  
83.859

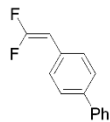

<sup>19</sup>F NMR, 376 MHz, CDCl<sub>3</sub>

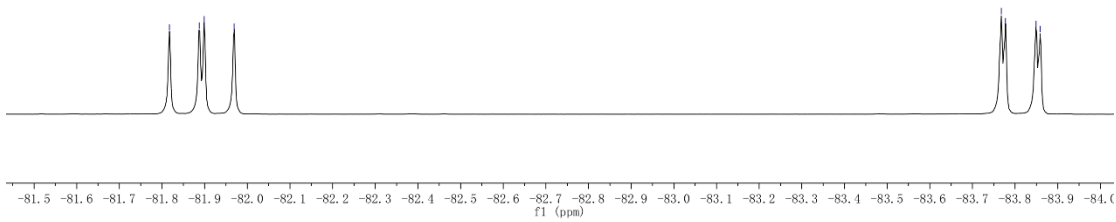

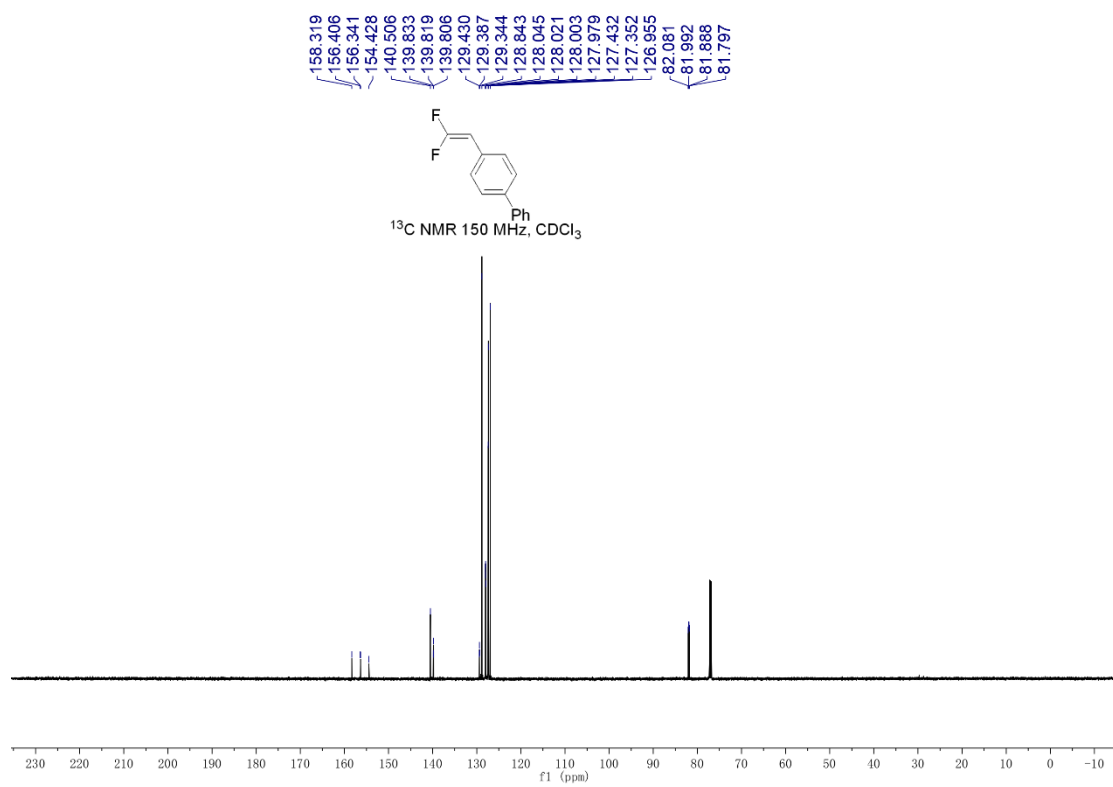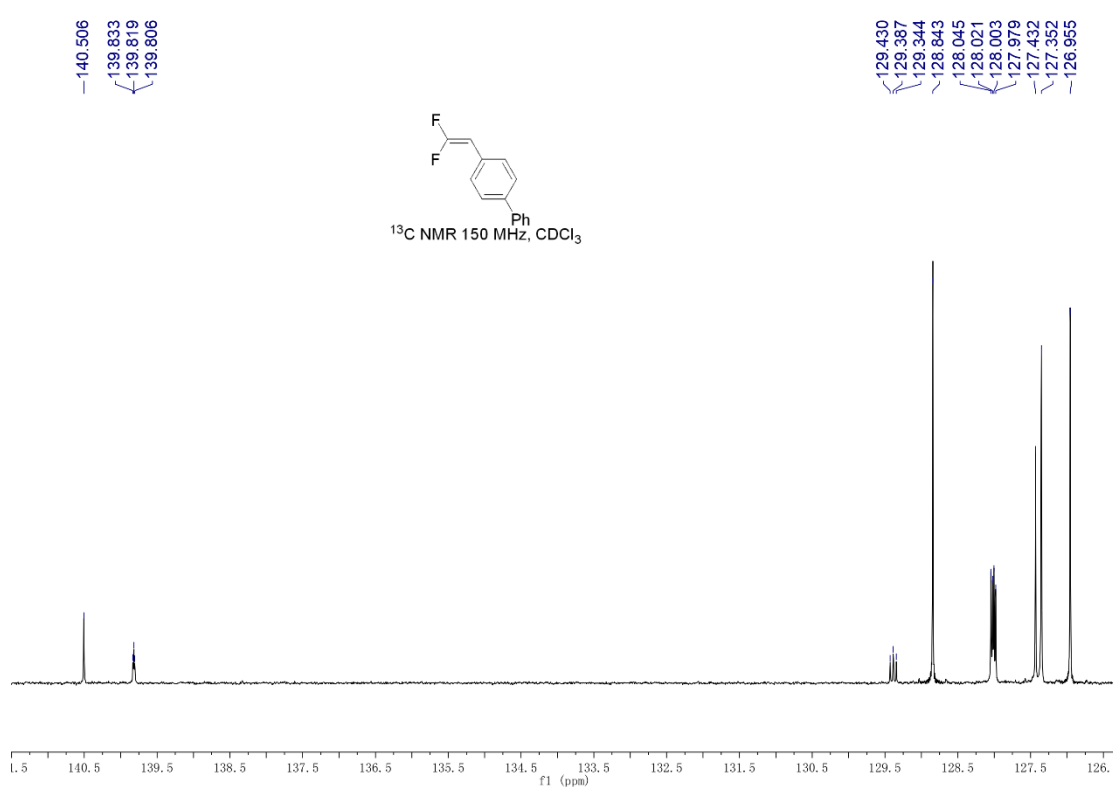

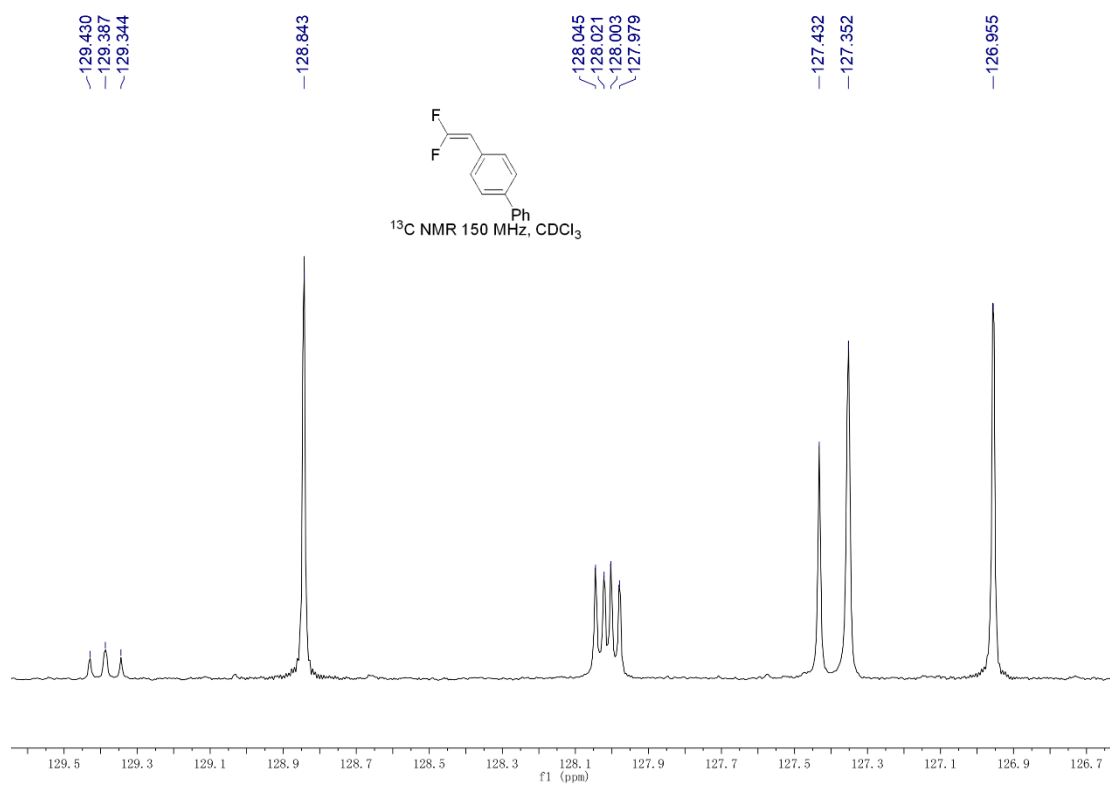

HRMS (ESI) copy of compound **2f**:

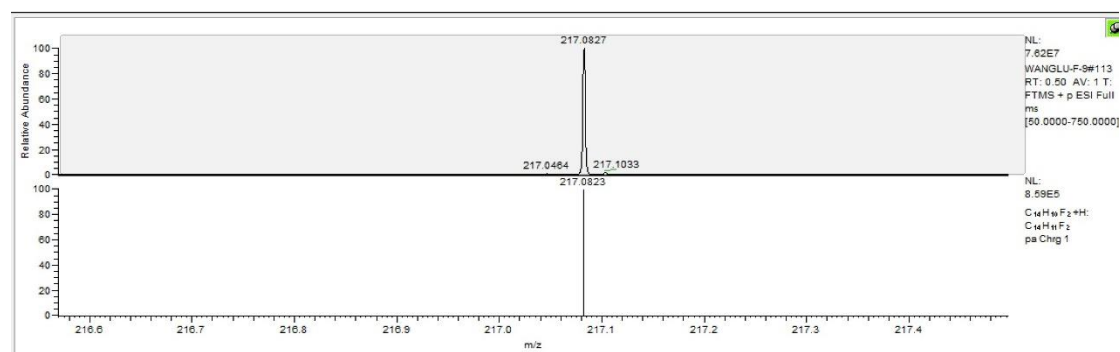

NMR copies of compound **2m**:

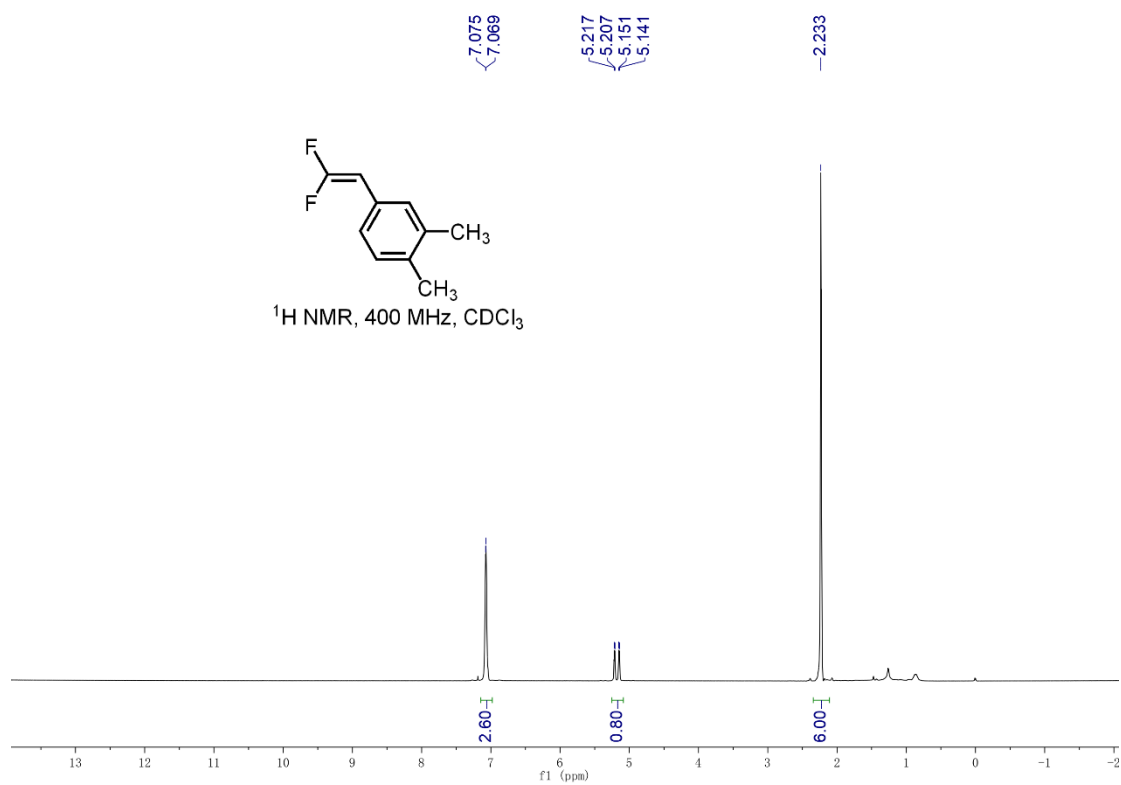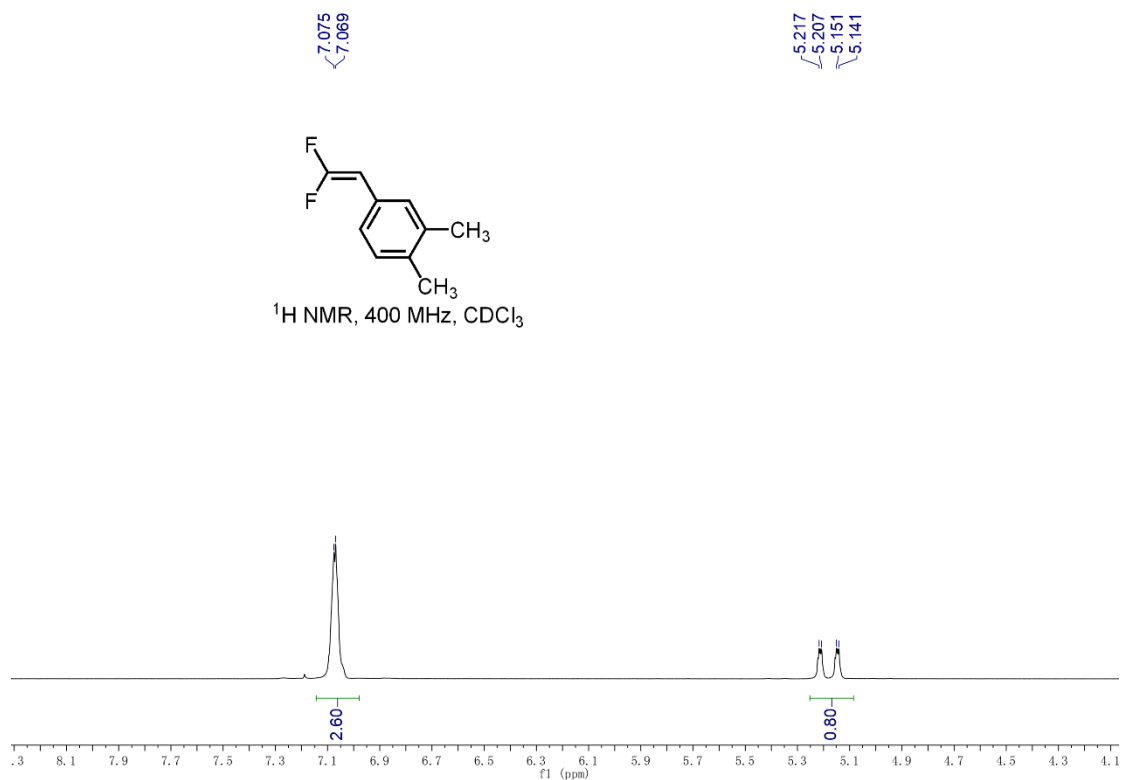

83.163  
83.234  
83.254  
83.324  
85.343  
85.353  
85.434  
85.444

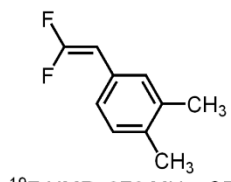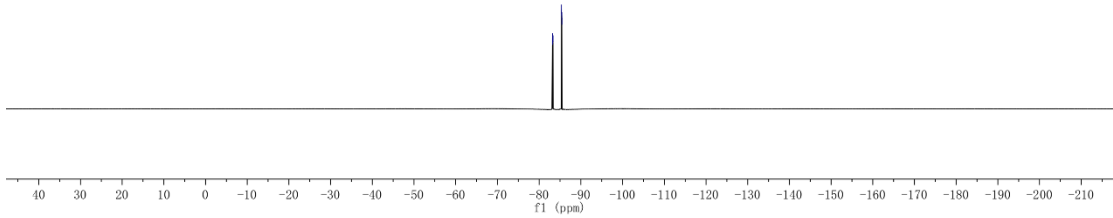

83.163  
83.234  
83.254  
83.324

85.343  
85.353  
85.434  
85.444

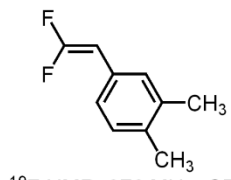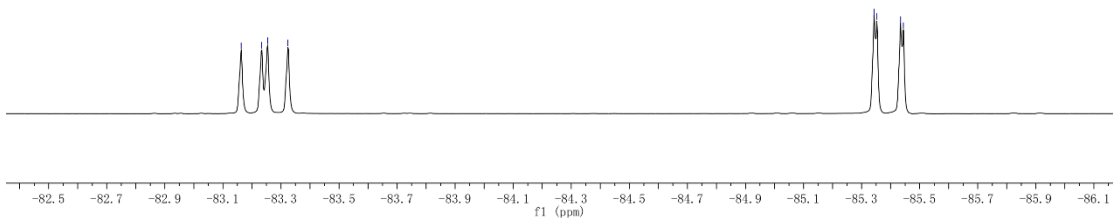

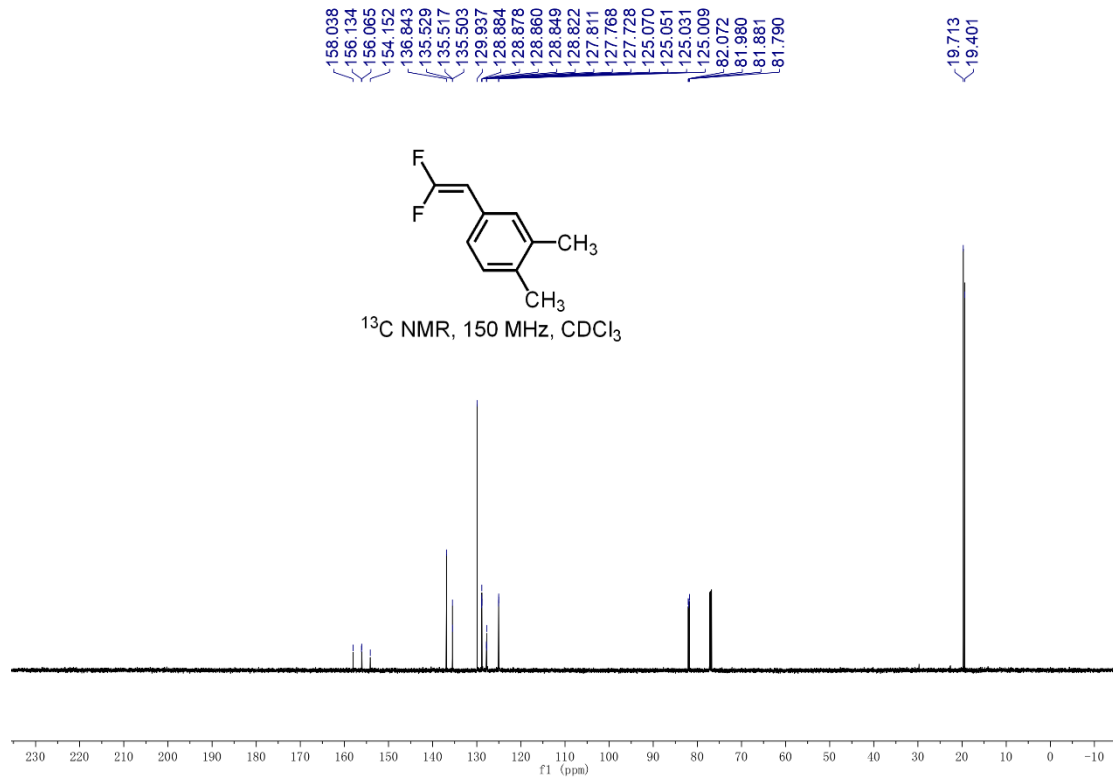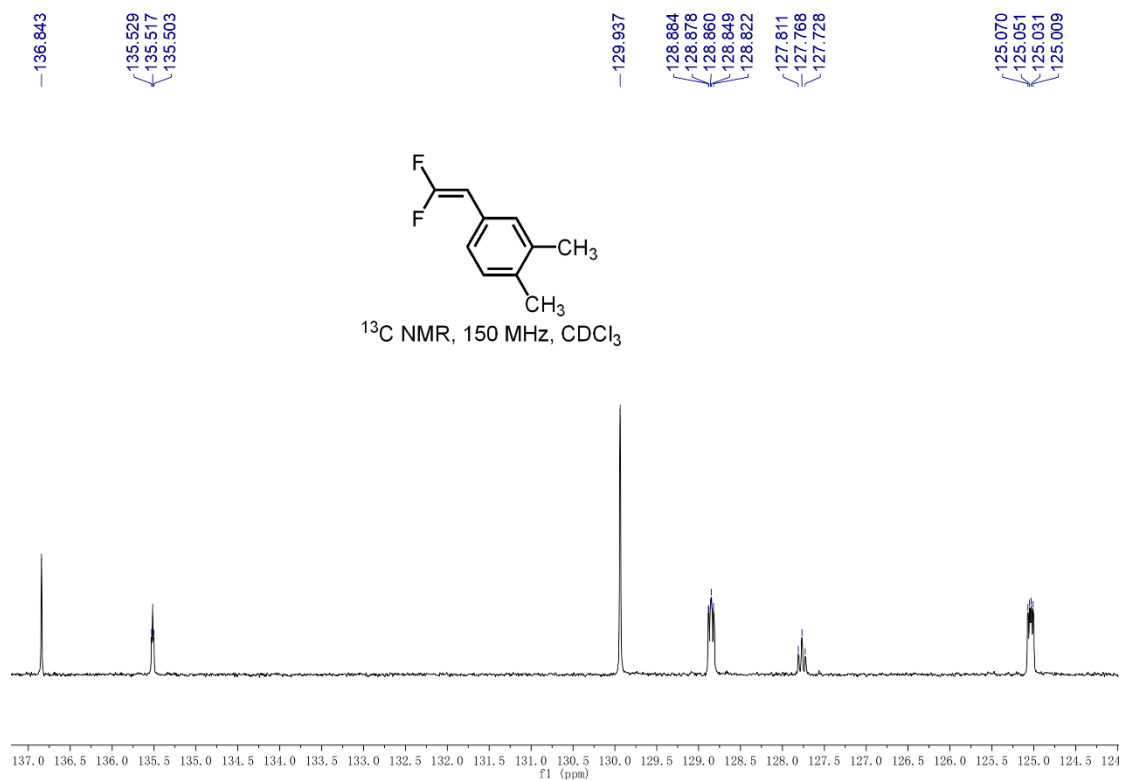

128.884  
128.878  
128.860  
128.849  
128.822

127.811  
127.768  
127.728

125.070  
125.051  
125.031  
125.009

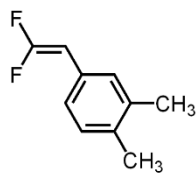

$^{13}\text{C}$  NMR, 150 MHz,  $\text{CDCl}_3$

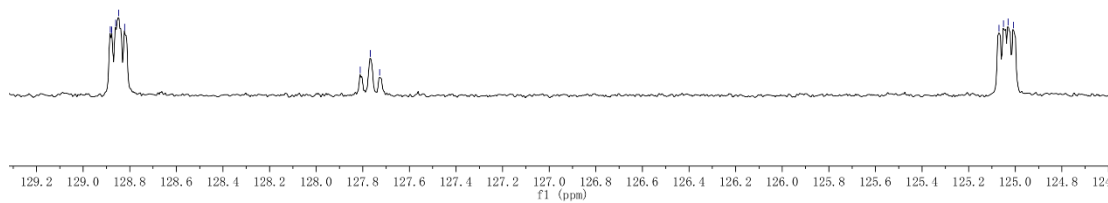

HRMS (ESI) copy of compound **2m**:

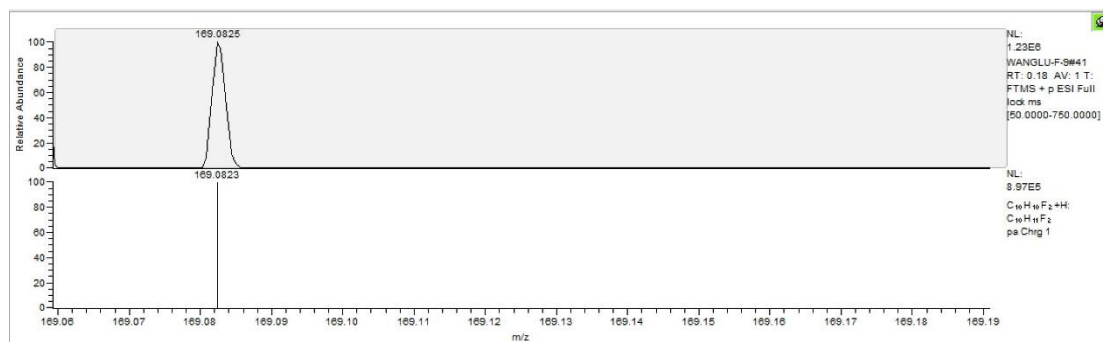

NMR copies of compound **2o**:

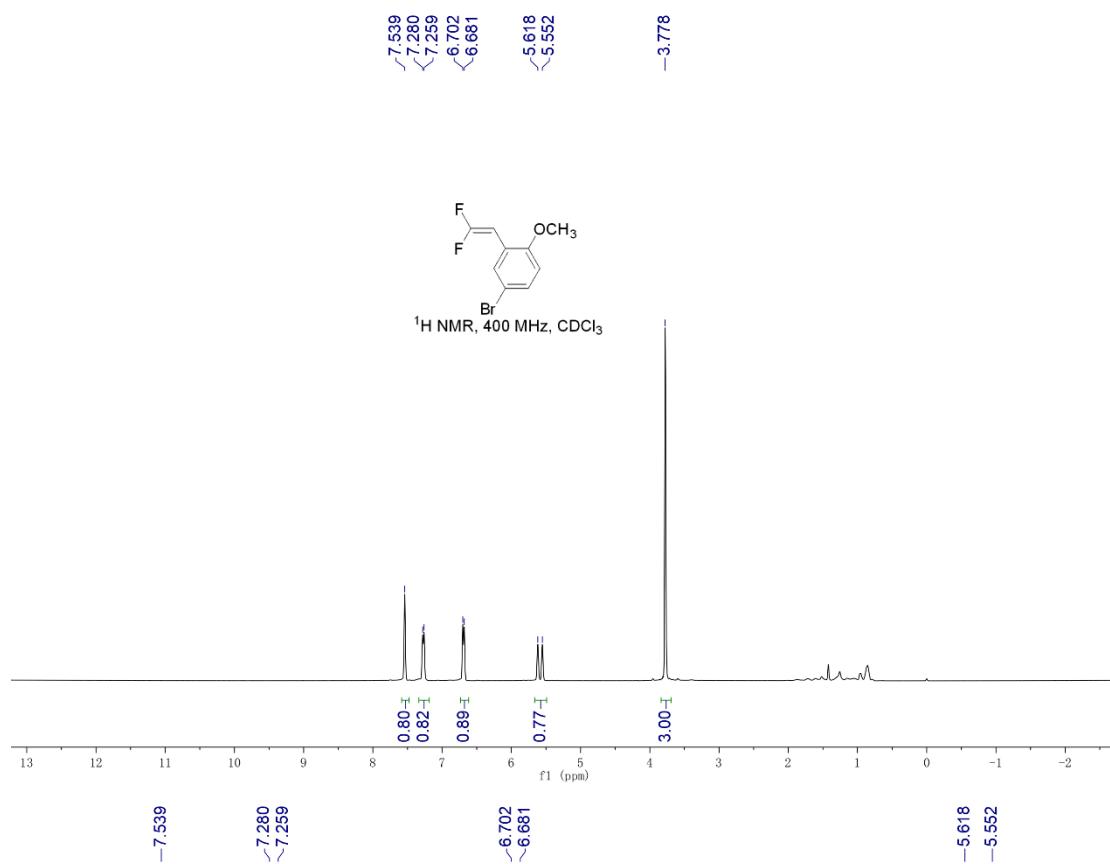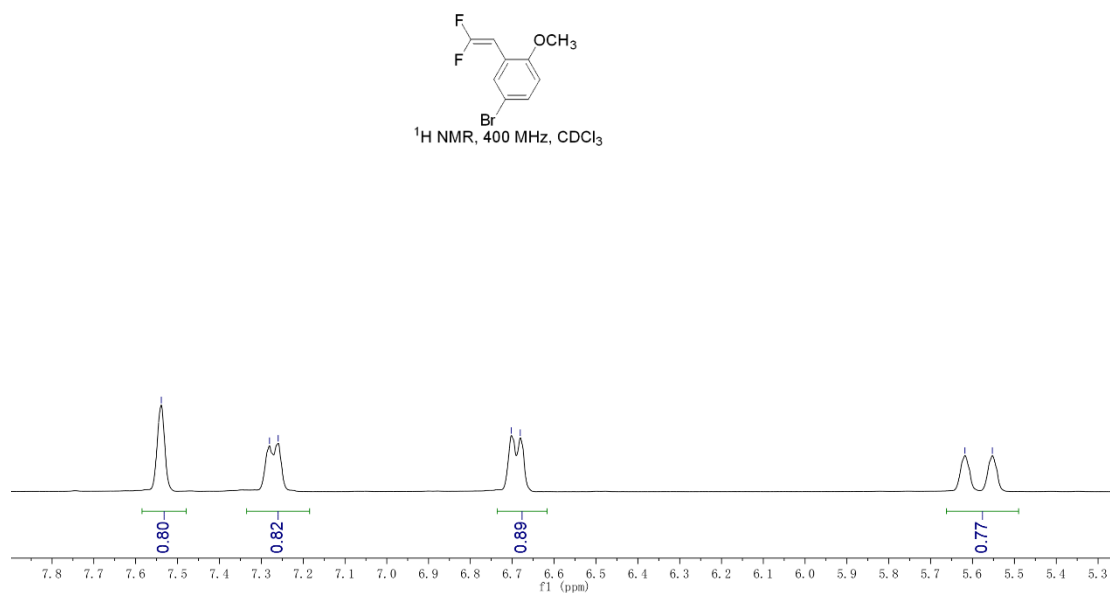



81.244  
81.318  
81.452  
81.523  
81.596

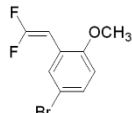

<sup>19</sup>F NMR, 376 MHz, CDCl<sub>3</sub>

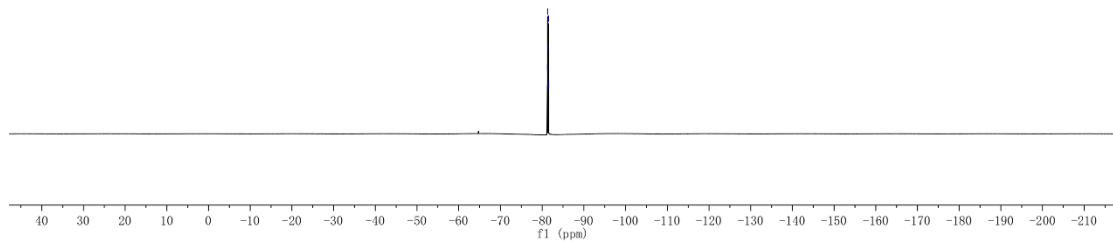

81.244  
81.318  
81.452  
81.523  
81.596

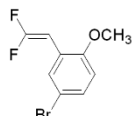

<sup>19</sup>F NMR, 376 MHz, CDCl<sub>3</sub>

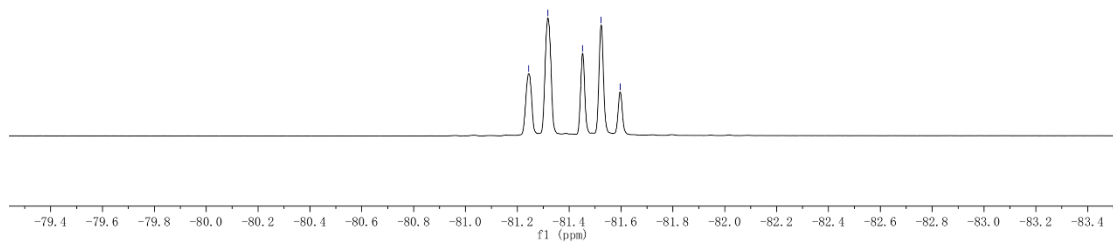

158.396  
 156.484  
 156.419  
 155.192  
 155.182  
 155.161  
 155.152  
 154.508  
 130.758  
 130.749  
 130.740  
 130.698  
 121.260  
 112.953  
 112.070  
 75.737  
 75.656  
 75.525  
 75.442  
 55.682

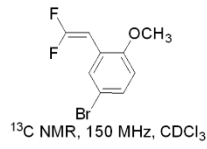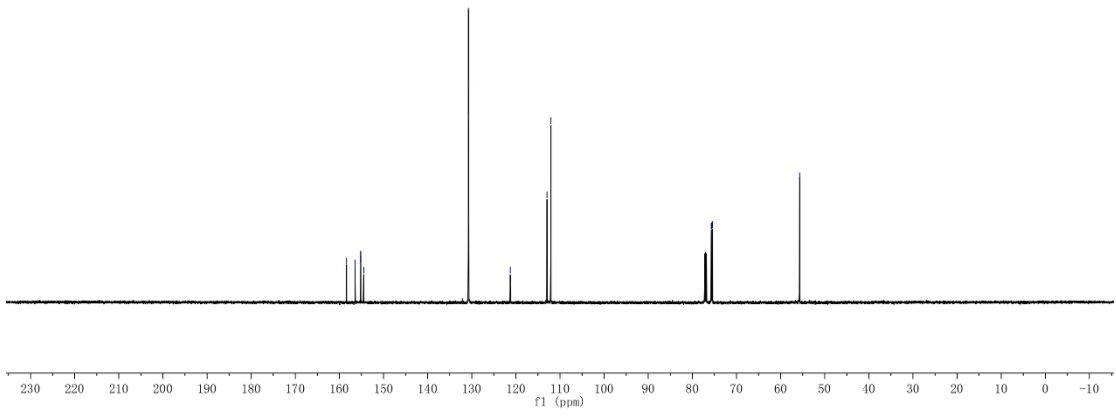

158.396  
 156.484  
 156.419  
 155.192  
 155.182  
 155.161  
 155.152  
 154.508  
 130.758  
 130.749  
 130.740  
 130.698  
 121.260  
 112.953  
 112.070

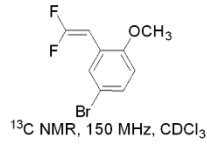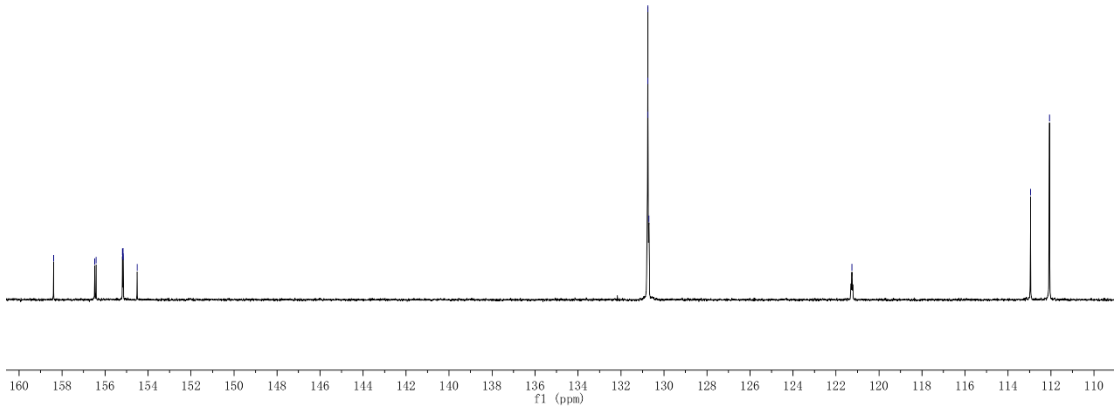

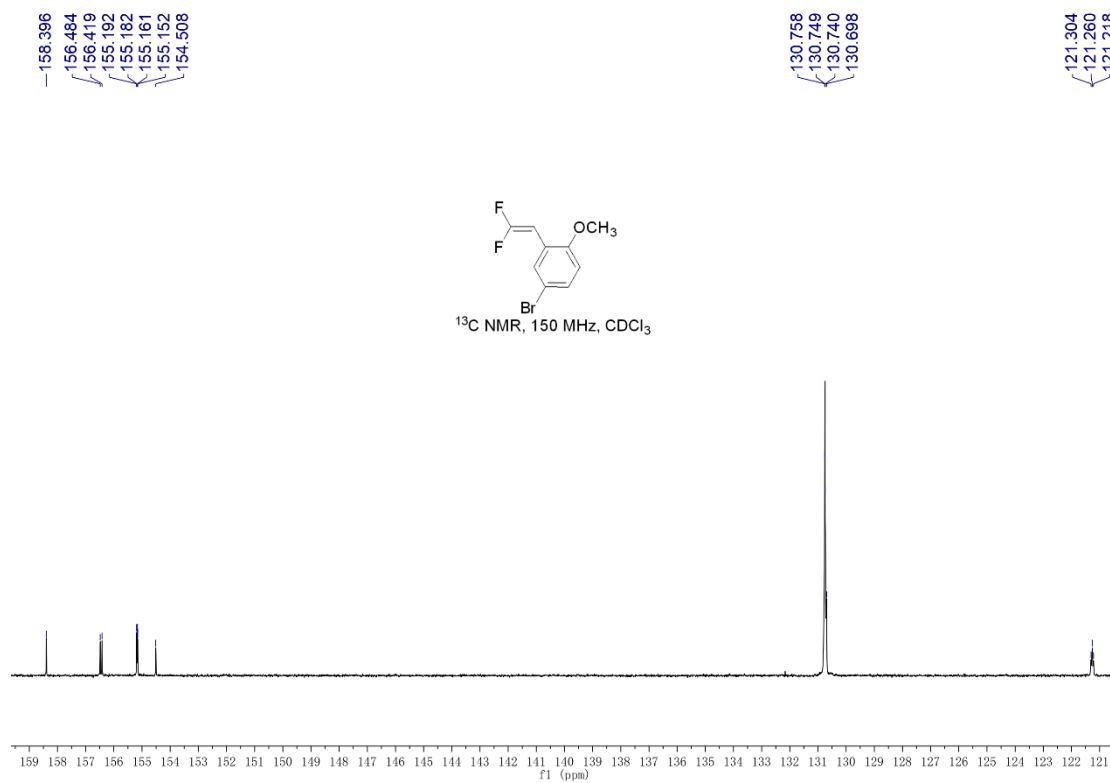

HRMS (ESI) copy of compound **2o**:

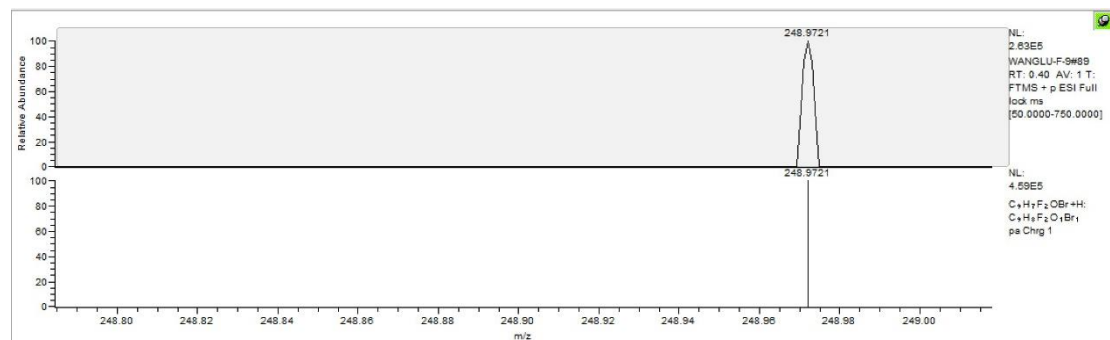

NMR copies of compound **2q**:

7.782  
7.713  
7.667  
7.476  
7.350  
5.765  
5.712

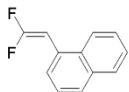

<sup>1</sup>H NMR 400MHz, CDCl<sub>3</sub>

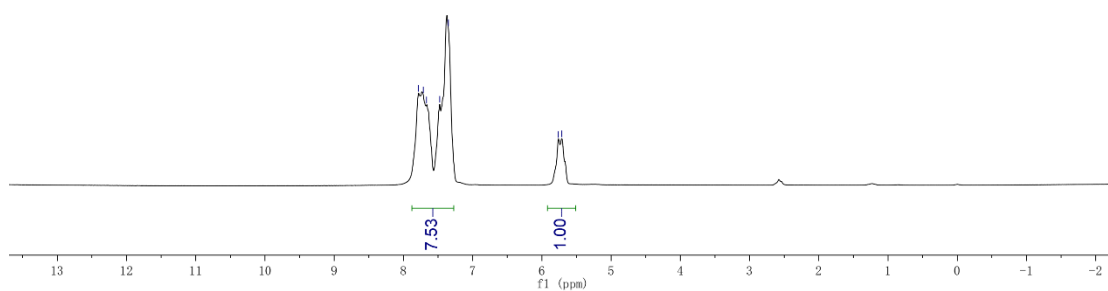

7.782  
7.713  
7.667  
7.476  
7.350  
5.765  
5.712

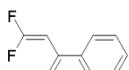

<sup>1</sup>H NMR 400MHz, CDCl<sub>3</sub>

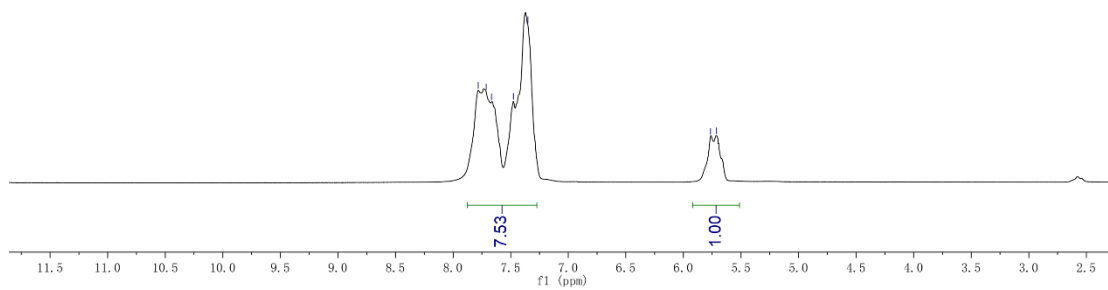

82.740  
82.818  
84.545  
84.618  
84.688

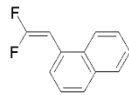

<sup>1</sup>H NMR 376 MHz, CDCl<sub>3</sub>

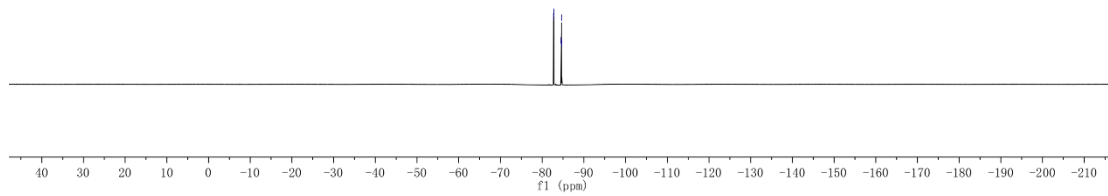

82.740  
82.818

84.545  
84.618  
84.688

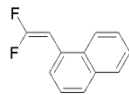

<sup>1</sup>H NMR 376 MHz, CDCl<sub>3</sub>

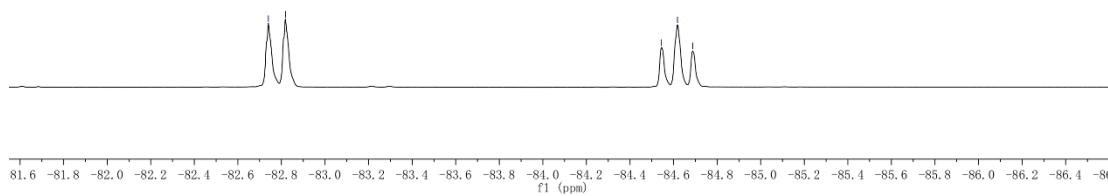

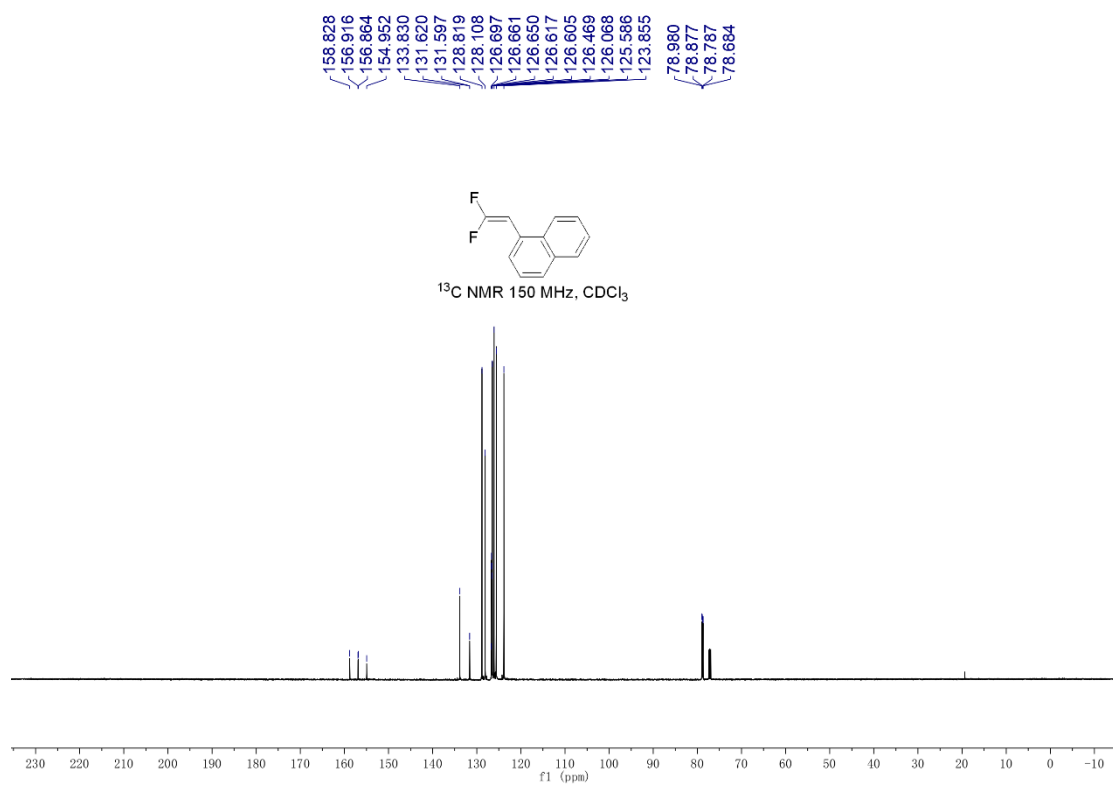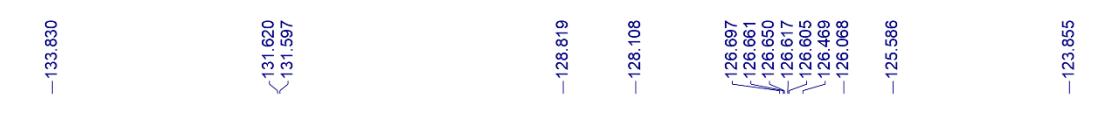



### 3. General procedure for the synthesis of compounds 3 or 4:

A mixture of 1 (0.6 mmol, 1.2 equiv), 2 (0.5 mmol, 1.0 equiv), and Cs<sub>2</sub>CO<sub>3</sub> (0.6 mmol, 1.2 equiv) in DMF (3 ml) were charged into a reaction tube (10 mL). The reaction mixture was stirred for 12 h at 100°. The progress of the reaction was monitored by TLC. After the complete consumption of starting materials, the reaction mixture was quenched with water and the product was extracted with EtOAc (3 × 15 mL), the combined organic layer was dried over anhydrous Na<sub>2</sub>SO<sub>4</sub>, and concentrated under reduced pressure. The residue was purified by flash column chromatography on silica gel to afford the corresponding compounds 3 or 4.

### 4. References

- [1] (a) Shi, X. T., Wang, Q., Tang, Z. Q., Huang, H. L., Cao, H., Liu, X. *Org. Lett.* **2024**, *26*, 1255–1260; (b) Shi, X. T., Lin, Y., Wei, J. H., Zhao, L. M., Guo, P. F., Cao, H., Liu, X. *Org. Chem. Front.* **2023**, *10*, 2892; (c) Li, W., Zhang, M. - Q., Yan, J., Ni, L.Y., Cao, H., Liu, X. *Org. Chem. Front.* **2022**, *9*, 2529; (d) Dai, W.; Li, C.; Liu, Y.; Han, X.; Li, X.; Chen, K.; Liu, H. *Org. Chem. Front.* **2020**, *7*, 2612; (e) Li, Y.; Cui, M.; Sha, F.; Li, Q.; Wu, X. *Org. Biomol. Chem.* **2019**, *17*, 8963; (f) Fang, L.; Chen, L.; Yu, J.; Wang, L. *Eur. J. Org. Chem.* **2015**, *9*, 1910.
- [2] (a) Liu, J., Yu, L. H., Zheng, C. W., Zhao, G. *Angew. Chem. Int. Ed.* **2021**, *60*, 23641; (b) Yan, S.-S.; Wu, D.-S.; Ye, J.-H.; Gong, L.; Zeng, X.; Ran, C.-K.; Gui, Y.-Y.; Li, J.; Yu, D.-G. *ACS. Catal.* **2019**, *9*, 6987-6992; (c) Sakaguchi, H.; Uetake, Y.; Ohashi, M.; Niwa, T.; Ogoshi, S.; Hosoya, T. *J. Am. Chem. Soc.* **2017**, *139*, 12855-12862.



## 5. Characterization data of compounds 3 and 4:

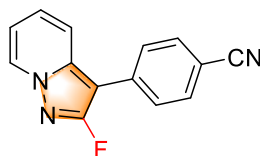

### 4-(2-fluoropyrazolo[1,5-*a*]pyridin-3-yl)benzonitrile (3a)

Purification by flash column chromatography on silica gel (EA/petroleum ether = 1:4), Yellow solid; Yield = 98 mg (83%); mp 221 - 223 °C.  $^1\text{H NMR}$  (400 MHz,  $\text{CDCl}_3$ ),  $\delta$ : 8.36 (d,  $J = 7.2$  Hz, 1H), 7.76 - 7.71 (m, 5H), 7.35 (t,  $J = 8.0$  Hz, 1H), 6.91 (t,  $J = 7.4$  Hz, 1H).  $^{19}\text{F NMR}$  (376 MHz,  $\text{CDCl}_3$ ),  $\delta$ : -127.89 (s).  $^{13}\text{C NMR}$  (150 MHz,  $\text{CDCl}_3$ ),  $\delta$ : 163.2 (d,  $J = 249.1$  Hz), 138.6, 135.2 (d,  $J = 4.3$  Hz), 132.7, 129.5, 127.4 (d,  $J = 2.8$  Hz), 126.5, 118.9, 116.5 (d,  $J = 3.4$  Hz), 112.7 (d,  $J = 2.5$  Hz), 109.5, 93.0 (d,  $J = 16.9$  Hz). **HRMS** (ESI): Calcd for  $\text{C}_{14}\text{H}_9\text{FN}_3$   $^+$   $m/z$  238.0775  $[\text{M}+\text{H}]^+$ , found 238.0776.

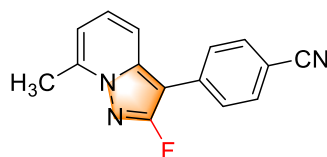

### 4-(2-fluoro-7-methylpyrazolo[1,5-*a*]pyridin-3-yl)benzonitrile (3b)

Purification by flash column chromatography on silica gel (EA/petroleum ether = 1:4), White solid; Yield = 78 mg (62%); mp 204 - 206 °C.  $^1\text{H NMR}$  (400 MHz,  $\text{CDCl}_3$ ),  $\delta$ : 7.73 (s, 4H), 7.64 (d,  $J = 8.8$  Hz, 1H), 7.31 (dd,  $J = 7.2$  Hz,  $J = 8.8$  Hz, 1H), 6.78 (d,  $J = 7.2$  Hz, 1H), 2.72 (s, 3H).  $^{19}\text{F NMR}$  (376 MHz,  $\text{CDCl}_3$ ),  $\delta$ : -128.34 (s).  $^{13}\text{C NMR}$  (150 MHz,  $\text{CDCl}_3$ ),  $\delta$ : 163.0 (d,  $J = 248.2$  Hz), 139.4, 139.0, 135.6 (d,  $J = 4.5$  Hz), 132.7, 127.4 (d,  $J = 2.8$  Hz), 126.7, 119.0, 113.9 (d,  $J = 3.4$  Hz), 112.3 (d,  $J = 2.8$  Hz), 109.3, 92.9 (d,  $J = 16.9$  Hz), 17.7. **HRMS** (ESI): Calcd for  $\text{C}_{15}\text{H}_{11}\text{FN}_3$   $^+$   $m/z$  252.0932  $[\text{M}+\text{H}]^+$ , found 252.0932.

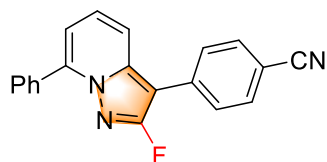

#### 4-(2-fluoro-7-phenylpyrazolo[1,5-a]pyridin-3-yl)benzonitrile (3c)

Purification by flash column chromatography on silica gel (EA/petroleum ether = 1:4), White solid; Yield = 113 mg (72%); mp 196 - 198 °C.  $^1\text{H NMR}$  (400 MHz,  $\text{CDCl}_3$ ),  $\delta$ : 7.84 (dd,  $J = 2.0$  Hz,  $J = 8.0$  Hz, 2H), 7.71 (s, 4H), 7.68 (s, 1H), 7.54 - 7.51 (m, 3H), 7.39 (dd,  $J = 7.2$  Hz,  $J = 8.8$  Hz, 1H), 6.94 (dd,  $J = 1.2$  Hz,  $J = 7.2$  Hz, 1H).  $^{19}\text{F NMR}$  (376 MHz,  $\text{CDCl}_3$ ),  $\delta$ : -127.79 (s).  $^{13}\text{C NMR}$  (150 MHz,  $\text{CDCl}_3$ ),  $\delta$ : 162.9 (d,  $J = 247.8$  Hz), 141.4, 139.7, 135.4 (d,  $J = 4.5$  Hz), 132.7, 132.4, 130.0, 129.2, 128.5, 127.5 (d,  $J = 2.5$  Hz), 126.9, 119.0, 115.1 (d,  $J = 3.1$  Hz), 113.6 (d,  $J = 2.7$  Hz), 109.5, 93.3 (d,  $J = 17.2$  Hz). **HRMS** (ESI): Calcd for  $\text{C}_{20}\text{H}_{13}\text{FN}_3$   $^+$   $m/z$  314.1088  $[\text{M}+\text{H}]^+$ , found 314.1088.

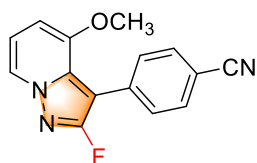

#### 4-(2-fluoro-4-methoxypyrazolo[1,5-a]pyridin-3-yl)benzonitrile (3d)

Purification by flash column chromatography on silica gel (EA/petroleum ether = 1:4), White solid; Yield = 71 mg (53%); mp 165 - 167 °C.  $^1\text{H NMR}$  (400 MHz,  $\text{CDCl}_3$ ),  $\delta$ : 7.99 (d,  $J = 7.6$  Hz, 1H), 7.70 - 7.59 (m, 4H), 6.80 - 6.72 (m, 1H), 6.58 (d,  $J = 7.6$  Hz, 1H), 3.87 (s, 3H).  $^{19}\text{F NMR}$  (376 MHz,  $\text{CDCl}_3$ ),  $\delta$ : -130.99 (s).  $^{13}\text{C NMR}$  (150 MHz,  $\text{CDCl}_3$ ),  $\delta$ : 163.3 (d,  $J = 247.5$  Hz), 151.1 (d,  $J = 3.1$  Hz), 134.7 (d,  $J = 3.9$  Hz), 132.1, 131.4, 130.7 (d,  $J = 1.8$  Hz), 122.3, 119.2, 111.7 (d,  $J = 2.5$  Hz), 109.6, 102.3, 94.4 (d,  $J = 17.2$  Hz), 55.6. **HRMS** (ESI): Calcd for  $\text{C}_{15}\text{H}_{11}\text{FN}_3\text{O}$   $^+$   $m/z$  268.0881  $[\text{M}+\text{H}]^+$ , found 268.0883.

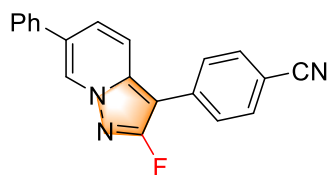

#### 4-(2-fluoro-6-phenylpyrazolo[1,5-a]pyridin-3-yl)benzonitrile (3e)

Purification by flash column chromatography on silica gel (EA/petroleum ether = 1:4), White solid; Yield = 86 mg (55%); mp 135 - 137 °C. **<sup>1</sup>H NMR** (400 MHz, CDCl<sub>3</sub>),  $\delta$ : 8.53 (s, 1H), 7.78 (d,  $J = 9.2$  Hz, 1H), 7.74 - 7.69 (m, 4H), 7.63 - 7.53 (m, 3H), 7.50 (t,  $J = 7.2$  Hz, 2H), 7.43 (d,  $J = 7.2$  Hz, 1H). **<sup>19</sup>F NMR** (376 MHz, CDCl<sub>3</sub>),  $\delta$ : -126.76 (s). **<sup>13</sup>C NMR** (150 MHz, CDCl<sub>3</sub>),  $\delta$ : 163.3 (d,  $J = 249.9$  Hz), 137.4, 136.2, 135.1 (d,  $J = 4.3$  Hz), 132.8, 129.3, 128.3, 127.2 (d,  $J = 2.8$  Hz), 126.9, 126.7 (d,  $J = 6.9$  Hz), 119.0, 116.4 (d,  $J = 3.3$  Hz), 109.5, 93.1 (d,  $J = 16.5$  Hz). **HRMS** (ESI): Calcd for C<sub>20</sub>H<sub>13</sub>FN<sub>3</sub><sup>+</sup> m/z 314.1088 [M+H]<sup>+</sup>, found 314.10877.

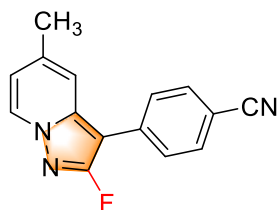

#### 4-(2-fluoro-5-methylpyrazolo[1,5-a]pyridin-3-yl)benzonitrile (3f)

Purification by flash column chromatography on silica gel (EA/petroleum ether = 1:4), White solid; Yield = 100 mg (80%); mp 188 - 190 °C. **<sup>1</sup>H NMR** (400 MHz, CDCl<sub>3</sub>),  $\delta$ : 8.21 (d,  $J = 7.2$  Hz, 1H), 7.74 - 7.69 (m, 4H), 7.48 (s, 1H), 6.65 (dd,  $J = 1.6$  Hz,  $J = 7.2$  Hz, 1H), 2.45 (s, 3H). **<sup>19</sup>F NMR** (376 MHz, CDCl<sub>3</sub>),  $\delta$ : -127.81 (s). **<sup>13</sup>C NMR** (150 MHz, CDCl<sub>3</sub>),  $\delta$ : 163.4 (d,  $J = 249.0$  Hz), 138.7 (d,  $J = 1.0$  Hz), 137.9, 135.6 (d,  $J = 4.5$  Hz), 132.7, 128.7, 127.2 (d,  $J = 2.8$  Hz), 119.0, 115.2 (d,  $J = 2.7$  Hz), 114.9 (d,  $J = 3.3$  Hz), 109.1, 92.0 (d,  $J = 16.8$  Hz), 21.6. **HRMS** (ESI): Calcd for C<sub>15</sub>H<sub>11</sub>FN<sub>3</sub><sup>+</sup> m/z 252.0932 [M+H]<sup>+</sup>, found 252.0932.

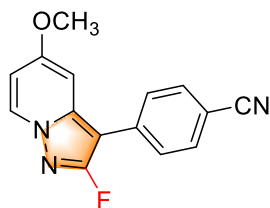

#### 4-(2-fluoro-5-methoxypyrazolo[1,5-*a*]pyridin-3-yl)benzonitrile (3g)

Purification by flash column chromatography on silica gel (EA/petroleum ether = 1:4), White solid; Yield = 113 mg (85%); mp 218 - 220 °C. **<sup>1</sup>H NMR** (600 MHz, CDCl<sub>3</sub>),  $\delta$ : 8.16 (d,  $J$  = 7.8 Hz, 1H), 7.73 (d,  $J$  = 8.4 Hz, 2H), 7.67 (d,  $J$  = 7.8 Hz, 2H), 6.90 (d,  $J$  = 2.4 Hz, 1H), 6.57 (dd,  $J$  = 3.0 Hz,  $J$  = 7.8 Hz, 1H), 3.91 (s, 3H). **<sup>19</sup>F NMR** (376 MHz, CDCl<sub>3</sub>),  $\delta$ : -127.21 (s). **<sup>13</sup>C NMR** (150 MHz, CDCl<sub>3</sub>),  $\delta$ : 163.8 (d,  $J$  = 248.8 Hz), 158.9, 139.7, 135.7 (d,  $J$  = 4.5 Hz), 132.7, 130.4, 127.0 (d,  $J$  = 2.7 Hz), 119.1, 109.0, 107.0 (d,  $J$  = 2.5 Hz), 93.8 (d,  $J$  = 2.7 Hz), 92.3 (d,  $J$  = 18.9 Hz), 55.8. **HRMS** (ESI): Calcd for C<sub>15</sub>H<sub>11</sub>FN<sub>3</sub>O<sup>+</sup>  $m/z$  268.0881 [M+H]<sup>+</sup>, found 268.0881.

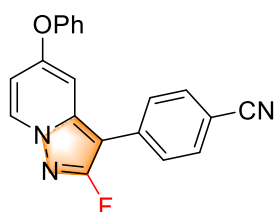

#### 4-(2-fluoro-5-phenoxy pyrazolo[1,5-*a*]pyridin-3-yl)benzonitrile (3h)

Purification by flash column chromatography on silica gel (EA/petroleum ether = 1:4), White solid; Yield = 146 mg (89%); mp 142 - 144 °C. **<sup>1</sup>H NMR** (400 MHz, CDCl<sub>3</sub>),  $\delta$ : 8.25 (d,  $J$  = 7.6 Hz, 1H), 7.65 (d,  $J$  = 8.4 Hz, 2H), 7.56 (d,  $J$  = 8.4 Hz, 2H), 7.44 (t,  $J$  = 8.0 Hz, 2H), 7.26 (t,  $J$  = 7.2 Hz, 1H), 7.12 (d,  $J$  = 7.6 Hz, 2H), 7.03 (d,  $J$  = 2.4 Hz, 1H), 6.67 (dd,  $J$  = 2.8 Hz,  $J$  = 7.6 Hz, 1H). **<sup>19</sup>F NMR** (376 MHz, CDCl<sub>3</sub>),  $\delta$ : -126.39 (s). **<sup>13</sup>C NMR** (150 MHz, CDCl<sub>3</sub>),  $\delta$ : 163.9 (d,  $J$  = 249.3 Hz), 157.2, 154.6, 139.5, 135.2 (d,  $J$  = 4.3 Hz), 132.7, 131.0, 130.3, 126.9, 125.4, 120.1, 118.9, 109.2, 107.0 (d,  $J$  = 2.5 Hz), 100.5 (d,  $J$  = 2.7 Hz), 92.8 (d,  $J$  = 17.4 Hz). **HRMS** (ESI): Calcd for C<sub>20</sub>H<sub>13</sub>FN<sub>3</sub>O<sup>+</sup>  $m/z$  330.1037 [M+H]<sup>+</sup>, found 330.1037.

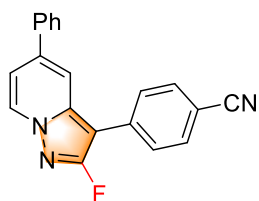

#### 4-(2-fluoro-5-phenylpyrazolo[1,5-a]pyridin-3-yl)benzonitrile (3i)

Purification by flash column chromatography on silica gel (EA/petroleum ether = 1:4), White solid; Yield = 122 mg (78%); mp 167 - 169 °C. **<sup>1</sup>H NMR** (400 MHz, CDCl<sub>3</sub>), δ: 8.38 (d, *J* = 7.2 Hz, 1H), 7.84 (s, 1H), 7.74 (s, 4H), 7.64 (d, *J* = 6.8 Hz, 2H), 7.53 - 7.44 (m, 3H), 7.14 (dd, *J* = 2.0 Hz, *J* = 7.2 Hz, 1H). **<sup>19</sup>F NMR** (376 MHz, CDCl<sub>3</sub>), δ: -127.14 (s). **<sup>13</sup>C NMR** (150 MHz, CDCl<sub>3</sub>), δ: 163.5 (d, *J* = 249.7 Hz), 139.9, 138.7, 138.1, 135.3 (d, *J* = 4.3 Hz), 132.8, 129.4, 129.2, 129.0, 127.4 (d, *J* = 2.8 Hz), 126.9, 119.0, 113.3 (d, *J* = 3.4 Hz), 112.6 (d, *J* = 2.5 Hz), 109.5, 93.4 (d, *J* = 16.8 Hz). **HRMS** (ESI): Calcd for C<sub>20</sub>H<sub>13</sub>FN<sub>3</sub><sup>+</sup> *m/z* 314.1088 [M+H]<sup>+</sup>, found 314.1089.

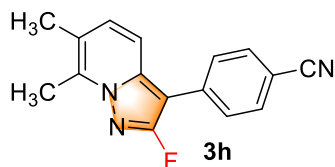

#### 4-(2-fluoro-6,7-dimethylpyrazolo[1,5-a]pyridin-3-yl)benzonitrile (3j)

Purification by flash column chromatography on silica gel (EA/petroleum ether = 1:4), White solid; Yield = 99 mg (75%); mp 166 - 169 °C. **<sup>1</sup>H NMR** (400 MHz, CDCl<sub>3</sub>), δ: 7.70 (s, 4H), 7.53 (d, *J* = 8.8 Hz, 1H), 7.20 (d, *J* = 9.2 Hz, 1H), 2.68 (s, 3H), 2.38 (s, 3H). **<sup>19</sup>F NMR** (376 MHz, CDCl<sub>3</sub>), δ: -128.82 (s). **<sup>13</sup>C NMR** (150 MHz, CDCl<sub>3</sub>), δ: 162.7 (d, *J* = 247.0 Hz), 137.6, 136.7, 135.8 (d, *J* = 4.5 Hz), 132.6, 130.0, 127.1 (d, *J* = 3.0 Hz), 119.8 (d, *J* = 2.8 Hz), 119.1, 112.9 (d, *J* = 3.3 Hz), 108.9, 92.3 (d, *J* = 16.9 Hz), 17.9, 14.0. **HRMS** (ESI): Calcd for C<sub>16</sub>H<sub>13</sub>FN<sub>3</sub><sup>+</sup> *m/z* 266.1088 [M+H]<sup>+</sup>, found 266.1088.

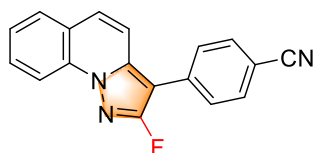

#### 4-(2-fluoropyrazolo[1,5-a]quinolin-3-yl)benzonitrile (3n)

Purification by flash column chromatography on silica gel (EA/petroleum ether = 1:4), White solid; Yield = 108 mg (75%); mp 199 - 201 °C.  $^1\text{H NMR}$  (400 MHz,  $\text{CDCl}_3$ ),  $\delta$ : 8.45 (d,  $J = 8.4$  Hz, 1H), 7.82 - 7.72 (m, 6H), 7.65 (d,  $J = 9.6$  Hz, 1H), 7.61 (d,  $J = 9.2$  Hz, 1H), 7.52 - 7.48 (m, 1H).  $^{19}\text{F NMR}$  (376 MHz,  $\text{CDCl}_3$ ),  $\delta$ : -128.56 (s).  $^{13}\text{C NMR}$  (150 MHz,  $\text{CDCl}_3$ ),  $\delta$ : 162.6 (d,  $J = 249.4$  Hz), 141.2, 136.3, 135.0 (d,  $J = 4.5$  Hz), 134.4, 132.7, 130.5, 128.6, 127.8 (d,  $J = 2.2$  Hz), 127.6, 125.2, 123.0, 118.9, 115.3, 114.5 (d,  $J = 2.1$  Hz), 110.0, 96.4 (d,  $J = 17.4$  Hz). **HRMS** (ESI): Calcd for  $\text{C}_{18}\text{H}_{11}\text{FN}_3$   $^+$   $m/z$  288.0932  $[\text{M}+\text{H}]^+$ , found 288.0930.

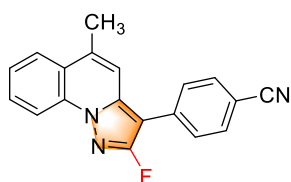

#### 4-(2-fluoro-5-methylpyrazolo[1,5-a]quinolin-3-yl)benzonitrile (3o)

Purification by flash column chromatography on silica gel (EA/petroleum ether = 1:4), White solid; Yield = 126 mg (84%); mp 202 - 204 °C.  $^1\text{H NMR}$  (400 MHz,  $\text{CDCl}_3$ ),  $\delta$ : 8.46 (d,  $J = 8.4$  Hz, 1H), 7.92 (d,  $J = 8.0$  Hz, 1H), 7.77 - 7.71 (m, 5H), 7.54 - 7.51 (m, 1H), 7.43 (s, 1H), 2.67 (s, 3H).  $^{19}\text{F NMR}$  (376 MHz,  $\text{CDCl}_3$ ),  $\delta$ : -129.01 (s).  $^{13}\text{C NMR}$  (150 MHz,  $\text{CDCl}_3$ ),  $\delta$ : 162.7 (d,  $J = 248.7$  Hz), 136.2, 135.3 (d,  $J = 4.3$  Hz), 135.3, 134.1, 132.7, 130.2, 127.7 (d,  $J = 2.7$  Hz), 125.3, 125.0, 123.5 (d,  $J = 2.1$  Hz), 119.0, 115.6, 113.8 (d,  $J = 2.1$  Hz), 109.7, 95.4 (d,  $J = 17.8$  Hz), 19.5. **HRMS** (ESI): Calcd for  $\text{C}_{19}\text{H}_{13}\text{FN}_3$   $^+$   $m/z$  302.1088  $[\text{M}+\text{H}]^+$ , found 302.1087.

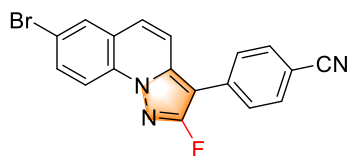

#### 4-(7-bromo-2-fluoropyrazolo[1,5-a]quinolin-3-yl)benzonitrile (3p)

Purification by flash column chromatography on silica gel (EA/petroleum ether = 1:4), White solid; Yield = 131 mg (72%); mp 244 - 246 °C.  $^1\text{H NMR}$  (400 MHz,  $\text{CDCl}_3$ ),  $\delta$ : 8.32 (d,  $J = 8.8$  Hz, 1H), 7.94 (d,  $J = 2.0$  Hz, 1H), 7.80 (dd,  $J = 2.0$ ,  $J = 8.8$ , 1H), 7.77 (d,  $J = 8.4$  Hz, 2H), 7.73 (d,  $J = 8.4$  Hz, 2H), 7.62 (d,  $J = 9.6$  Hz, 1H), 7.54 (d,  $J = 9.2$  Hz, 1H).  $^{19}\text{F NMR}$  (376 MHz,  $\text{CDCl}_3$ ),  $\delta$ : -127.99 (s).  $^{13}\text{C NMR}$  (150 MHz,  $\text{CDCl}_3$ ),  $\delta$ : 162.7 (d,  $J = 249.4$  Hz), 136.1, 134.6 (d,  $J = 4.5$  Hz), 133.4, 133.2, 132.8, 130.8, 127.9 (d,  $J = 2.4$  Hz), 126.4, 124.5 (d,  $J = 1.6$  Hz), 118.8, 118.5, 117.2, 115.8 (d,  $J = 2.4$  Hz), 110.3, 97.1 (d,  $J = 17.8$  Hz). **HRMS** (ESI): Calcd for  $\text{C}_{18}\text{H}_{10}\text{BrFN}_3$   $^+$   $m/z$  366.0037  $[\text{M}+\text{H}]^+$ , found 366.0034.

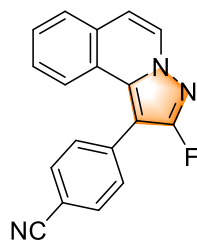

#### 4-(2-fluoropyrazolo[5,1-a]isoquinolin-1-yl)benzonitrile (3q)

Purification by flash column chromatography on silica gel (EA/petroleum ether = 1:4), White solid; Yield = 92 mg (64%); mp 148 - 150 °C.  $^1\text{H NMR}$  (400 MHz,  $\text{CDCl}_3$ ),  $\delta$ : 8.10 (d,  $J = 7.2$  Hz, 1H), 7.91 (d,  $J = 8.4$  Hz, 1H), 7.82 (d,  $J = 8.0$  Hz, 2H), 7.76 (d,  $J = 8.0$  Hz, 1H), 7.71 (d,  $J = 8.0$  Hz, 2H), 7.58 (t,  $J = 8.0$  Hz, 1H), 7.41 (t,  $J = 7.2$  Hz, 1H), 7.10 (d,  $J = 7.2$  Hz, 1H).  $^{19}\text{F NMR}$  (376 MHz,  $\text{CDCl}_3$ ),  $\delta$ : -131.81 (s).  $^{13}\text{C NMR}$  (150 MHz,  $\text{CDCl}_3$ ),  $\delta$ : 162.5 (d,  $J = 247.0$  Hz), 135.4 (d,  $J = 3.3$  Hz), 135.3, 132.6, 131.0, 129.7, 128.9, 127.9, 127.6, 126.2, 123.9 (d,  $J = 2.5$  Hz), 123.1, 118.7, 112.6 (d,  $J = 2.4$  Hz), 111.5, 97.5 (d,  $J = 20.1$  Hz). **HRMS** (ESI): Calcd for  $\text{C}_{18}\text{H}_{10}\text{BrFN}_3$   $^+$   $m/z$  288.0932  $[\text{M}+\text{H}]^+$ , found 288.0935.

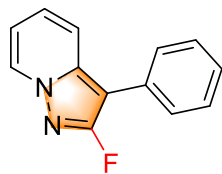

### 2-fluoro-3-phenylpyrazolo[1,5-a]pyridine (4a)

Purification by flash column chromatography on silica gel (EA/petroleum ether = 1:4), Orange oil; Yield = 61 mg (58%).  $^1\text{H NMR}$  (400 MHz,  $\text{CDCl}_3$ ),  $\delta$ : 8.30 (d,  $J = 6.8$  Hz, 1H), 7.70 (d,  $J = 8.8$  Hz, 1H), 7.60 (d,  $J = 8.0$  Hz, 2H), 7.45 (t,  $J = 8.0$  Hz, 2H), 7.31 (t,  $J = 7.2$  Hz, 1H), 7.22 (t,  $J = 7.6$  Hz, 1H), 6.80 (t,  $J = 6.8$  Hz, 1H).  $^{19}\text{F NMR}$  (376 MHz,  $\text{CDCl}_3$ ),  $\delta$ : -130.22 (s).  $^{13}\text{C NMR}$  (150 MHz,  $\text{CDCl}_3$ ),  $\delta$ : 163.0 (d,  $J = 247.6$  Hz), 138.5 (d,  $J = 1.6$  Hz), 130.1 (d,  $J = 4.1$  Hz), 129.0, 128.9, 127.5 (d,  $J = 2.1$  Hz), 126.5, 125.17, 116.8 (d,  $J = 3.7$  Hz), 111.9 (d,  $J = 2.8$  Hz), 94.5 (d,  $J = 17.5$  Hz). **HRMS** (ESI): Calcd for  $\text{C}_{13}\text{H}_{10}\text{FN}_2^+$   $m/z$  213.0823  $[\text{M}+\text{H}]^+$ , found 213.0822.

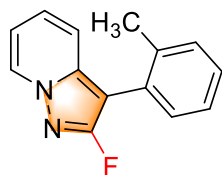

### 2-fluoro-3-(o-tolyl)pyrazolo[1,5-a]pyridine (4b)

Purification by flash column chromatography on silica gel (EA/petroleum ether = 1:4), Orange oil; Yield = 34 mg (30%).  $^1\text{H NMR}$  (400 MHz,  $\text{CDCl}_3$ ),  $\delta$ : 8.32 (d,  $J = 7.2$  Hz, 1H), 7.32 - 7.29 (m, 5H), 7.18 - 7.14 (m, 1H), 6.80 (t,  $J = 8.4$  Hz, 1H), 2.29 (s, 3H).  $^{19}\text{F NMR}$  (376 MHz,  $\text{CDCl}_3$ ),  $\delta$ : -127.51 (s).  $^{13}\text{C NMR}$  (150 MHz,  $\text{CDCl}_3$ ),  $\delta$ : 162.8 (d,  $J = 247.0$  Hz), 139.4 (d,  $J = 2.7$  Hz), 137.7, 130.8, 130.6, 128.7, 128.5 (d,  $J = 3.0$  Hz), 127.8, 125.8, 124.6, 116.8 (d,  $J = 3.9$  Hz), 111.7 (d,  $J = 3.0$  Hz), 94.1 (d,  $J = 21.0$  Hz), 20.0. **HRMS** (ESI): Calcd for  $\text{C}_{14}\text{H}_{12}\text{FN}_2^+$   $m/z$  227.0979  $[\text{M}+\text{H}]^+$ , found 227.0978.



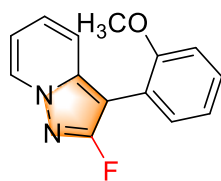

#### 2-fluoro-3-(2-methoxyphenyl)pyrazolo[1,5-a]pyridine (4c)

Purification by flash column chromatography on silica gel (EA/petroleum ether = 1:4), Orange oil; Yield = 43 mg (36%).  $^1\text{H NMR}$  (400 MHz,  $\text{CDCl}_3$ ),  $\delta$ : 8.27 (d,  $J = 7.2$  Hz, 1H), 7.43 - 7.39 (m, 2H), 7.37 - 7.33 (m, 1H), 7.14 (t,  $J = 7.2$  Hz, 1H), 7.06 (d,  $J = 7.6$  Hz, 1H), 7.02 (d,  $J = 8.0$  Hz, 1H), 6.76 (t,  $J = 6.8$  Hz, 1H), 3.84 (s, 3H).  $^{19}\text{F NMR}$  (376 MHz,  $\text{CDCl}_3$ ),  $\delta$ : -128.31 (s).  $^{13}\text{C NMR}$  (150 MHz,  $\text{CDCl}_3$ ),  $\delta$ : 163.2 (d,  $J = 247.6$  Hz), 156.8, 139.3 (d,  $J = 2.1$  Hz), 131.1 (d,  $J = 1.0$  Hz), 128.7, 128.6, 124.2, 120.8, 118.5 (d,  $J = 3.7$  Hz), 118.0 (d,  $J = 3.6$  Hz), 111.5 (d,  $J = 2.7$  Hz), 111.3, 91.1 (d,  $J = 19.2$  Hz), 55.4. **HRMS** (ESI): Calcd for  $\text{C}_{14}\text{H}_{12}\text{FN}_2\text{O}^+$   $m/z$  243.0928  $[\text{M}+\text{H}]^+$ , found 243.0929.

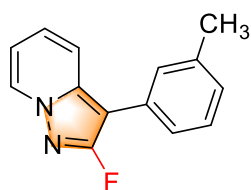

#### 2-fluoro-3-(m-tolyl)pyrazolo[1,5-a]pyridine (4d)

Purification by flash column chromatography on silica gel (EA/petroleum ether = 1:4), Orange oil; Yield = 72 mg (64%).  $^1\text{H NMR}$  (400 MHz,  $\text{CDCl}_3$ ),  $\delta$ : 8.30 (d,  $J = 7.2$  Hz, 1H), 7.70 (d,  $J = 8.8$  Hz, 1H), 7.42- 7.34 (m, 3H), 7.24 -7.20 (m, 1H), 7.13 (d,  $J = 7.2$  Hz, 1H), 6.80 (t,  $J = 6.8$  Hz, 1H), 2.43 (s, 3H).  $^{19}\text{F NMR}$  (376 MHz,  $\text{CDCl}_3$ ),  $\delta$ : -130.17 (s).  $^{13}\text{C NMR}$  (150 MHz,  $\text{CDCl}_3$ ),  $\delta$ : 163.0 (d,  $J = 247.8$  Hz), 138.6, 138.5 (d,  $J = 1.8$  Hz), 130.0 (d,  $J = 4.2$  Hz), 129.0, 128.9, 128.3 (d,  $J = 1.9$  Hz), 127.3, 125.0, 124.6 (d,  $J = 2.1$  Hz), 116.9 (d,  $J = 3.6$  Hz), 111.8 (d,  $J = 2.7$  Hz), 94.6 (d,  $J = 17.4$  Hz), 21.5. **HRMS** (ESI): Calcd for  $\text{C}_{14}\text{H}_{12}\text{FN}_2^+$   $m/z$  227.0979  $[\text{M}+\text{H}]^+$ , found 227.0979.

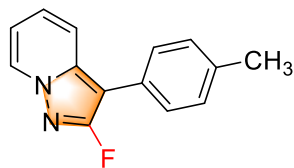

### 2-fluoro-3-(p-tolyl)pyrazolo[1,5-a]pyridine (4e)

Purification by flash column chromatography on silica gel (EA/petroleum ether = 1:4), Orange oil; Yield = 96 mg (85%).  $^1\text{H NMR}$  (400 MHz,  $\text{CDCl}_3$ ),  $\delta$ : 8.29 (d,  $J = 7.2$  Hz, 1H), 7.68 (d,  $J = 9.2$  Hz, 1H), 7.49 (d,  $J = 8.0$  Hz, 2H), 7.28 (d,  $J = 8.0$  Hz, 2H), 7.20 (t,  $J = 8.0$  Hz, 1H), 6.79 (t,  $J = 7.2$  Hz, 1H), 2.40 (s, 3H).  $^{19}\text{F NMR}$  (376 MHz,  $\text{CDCl}_3$ ),  $\delta$ : -130.47 (s).  $^{13}\text{C NMR}$  (150 MHz,  $\text{CDCl}_3$ ),  $\delta$ : 162.9 (d,  $J = 247.6$  Hz), 138.4 (d,  $J = 1.6$  Hz), 136.3, 129.6, 128.9, 127.5 (d,  $J = 1.9$  Hz), 127.1 (d,  $J = 4.2$  Hz), 124.9, 116.8 (d,  $J = 3.7$  Hz), 111.8 (d,  $J = 2.8$  Hz), 94.5 (d,  $J = 17.7$  Hz), 21.2. **HRMS** (ESI): Calcd for  $\text{C}_{14}\text{H}_{12}\text{FN}_2^+$   $m/z$  227.0979  $[\text{M}+\text{H}]^+$ , found 227.0979.

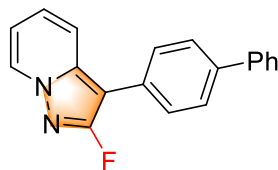

### 3-([1,1'-biphenyl]-4-yl)-2-fluoropyrazolo[1,5-a]pyridine (4f)

Purification by flash column chromatography on silica gel (EA/petroleum ether = 1:4), White solid; Yield = 127 mg (88%); mp 114 - 116 °C.  $^1\text{H NMR}$  (400 MHz,  $\text{CDCl}_3$ ),  $\delta$ : 8.30 (d,  $J = 7.2$  Hz, 1H), 7.74 - 7.63 (m, 7H), 7.45 (t,  $J = 7.6$  Hz, 2H), 7.35 (t,  $J = 7.2$  Hz, 1H), 7.23 (t,  $J = 8.0$  Hz, 1H), 6.80 (t,  $J = 7.2$  Hz, 1H).  $^{19}\text{F NMR}$  (376 MHz,  $\text{CDCl}_3$ ),  $\delta$ : -129.74 (s).  $^{13}\text{C NMR}$  (150 MHz,  $\text{CDCl}_3$ ),  $\delta$ : 162.9 (d,  $J = 247.8$  Hz), 141.4, 139.7, 135.4 (d,  $J = 4.5$  Hz), 132.7, 132.4, 130.0, 129.2, 128.5, 127.5 (d,  $J = 2.5$  Hz), 126.9, 119.0, 115.1 (d,  $J = 3.1$  Hz), 113.6 (d,  $J = 2.7$  Hz), 109.5, 93.3 (d,  $J = 17.2$  Hz). **HRMS** (ESI): Calcd for  $\text{C}_{19}\text{H}_{14}\text{FN}_2^+$   $m/z$  289.1136  $[\text{M}+\text{H}]^+$ , found 289.1136.

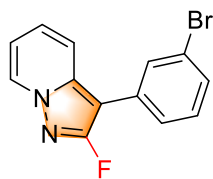

### 3-(3-bromophenyl)-2-fluoropyrazolo[1,5-*a*]pyridine (4h)

Purification by flash column chromatography on silica gel (EA/petroleum ether = 1:4), Orange oil; Yield = 75 mg (52%). **<sup>1</sup>H NMR** (400 MHz, CDCl<sub>3</sub>),  $\delta$ : 8.31 (d,  $J$  = 7.2 Hz, 1H), 7.74 (s, 1H), 7.69 (d,  $J$  = 9.2 Hz, 1H), 7.53 (d,  $J$  = 7.6 Hz, 1H), 7.43 (d,  $J$  = 8.0 Hz, 1H), 7.33 (d,  $J$  = 7.6 Hz, 1H), 7.31 - 7.24 (m, 1H), 6.84 (t,  $J$  = 6.8 Hz, 1H). **<sup>19</sup>F NMR** (376 MHz, CDCl<sub>3</sub>),  $\delta$ : -129.38 (s). **<sup>13</sup>C NMR** (150 MHz, CDCl<sub>3</sub>),  $\delta$ : 162.9 (d,  $J$  = 248.4 Hz), 138.5 (d,  $J$  = 1.2 Hz), 132.2 (d,  $J$  = 4.2 Hz), 130.4, 130.1 (d,  $J$  = 2.4 Hz), 129.4, 129.1, 126.0 (d,  $J$  = 2.2 Hz), 125.7, 123.0, 116.5 (d,  $J$  = 3.4 Hz), 112.2 (d,  $J$  = 2.7 Hz), 93.2 (d,  $J$  = 17.2 Hz). **HRMS** (ESI): Calcd for C<sub>13</sub>H<sub>9</sub>BrFN<sub>2</sub><sup>+</sup>  $m/z$  290.9928 [M+H]<sup>+</sup>, found 290.9918.

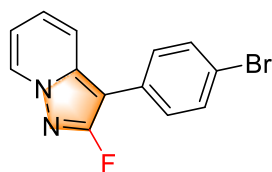

### 3-(4-bromophenyl)-2-fluoropyrazolo[1,5-*a*]pyridine (4i)

Purification by flash column chromatography on silica gel (EA/petroleum ether = 1:4), White solid; Yield = 99 mg (68%); mp 129 - 131 °C. **<sup>1</sup>H NMR** (400 MHz, CDCl<sub>3</sub>),  $\delta$ : 8.31 (d,  $J$  = 7.6 Hz, 1H), 7.65 (d,  $J$  = 8.8 Hz, 1H), 7.58 (d,  $J$  = 8.0 Hz, 2H), 7.47 (d,  $J$  = 8.4 Hz, 2H), 7.26 (t,  $J$  = 7.2 Hz, 1H), 6.83 (t,  $J$  = 6.8 Hz, 1H). **<sup>19</sup>F NMR** (376 MHz, CDCl<sub>3</sub>),  $\delta$ : -129.75 (s). **<sup>13</sup>C NMR** (150 MHz, CDCl<sub>3</sub>),  $\delta$ : 162.9 (d,  $J$  = 247.9 Hz), 138.4 (d,  $J$  = 1.5 Hz), 132.1, 129.1 (d,  $J$  = 2.2 Hz), 129.1, 128.9 (d,  $J$  = 2.2 Hz), 125.6, 120.2, 116.5 (d,  $J$  = 3.4 Hz), 112.1 (d,  $J$  = 2.8 Hz), 93.5 (d,  $J$  = 17.4 Hz). **HRMS** (ESI): Calcd for C<sub>13</sub>H<sub>9</sub>BrFN<sub>2</sub><sup>+</sup>  $m/z$  290.9928 [M+H]<sup>+</sup>, found 290.9928.

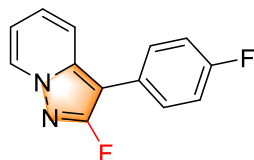

### 2-fluoro-3-(4-fluorophenyl)pyrazolo[1,5-a]pyridine (4j)

Purification by flash column chromatography on silica gel (EA/petroleum ether = 1:4), White solid; Yield = 83 mg (72%); mp 87 - 89 °C. **<sup>1</sup>H NMR** (400 MHz, CDCl<sub>3</sub>),  $\delta$ : 8.31 (d,  $J$  = 6.8 Hz, 1H), 7.64 (d,  $J$  = 8.8 Hz, 1H), 7.56 (d,  $J$  = 5.2 Hz, 1H), 7.54 (d,  $J$  = 5.2 Hz, 1H), 7.23 (d,  $J$  = 8.0 Hz, 1H), 7.16 (t,  $J$  = 8.8 Hz, 2H), 6.82 (t,  $J$  = 7.2 Hz, 1H). **<sup>19</sup>F NMR** (376 MHz, CDCl<sub>3</sub>),  $\delta$ : -115.35 (m), -130.72 (s). **<sup>13</sup>C NMR** (150 MHz, CDCl<sub>3</sub>),  $\delta$ : 162.8 (d,  $J$  = 247.3 Hz), 161.5 (d,  $J$  = 245.0 Hz), 138.4 (d,  $J$  = 1.5 Hz), 129.2 (dd,  $J$  = 1.9 Hz,  $J$  = 7.8 Hz), 129.0, 126.1 (t,  $J$  = 3.7 Hz), 125.3, 116.5 (d,  $J$  = 3.6 Hz), 115.9 (d,  $J$  = 21.3 Hz), 112.0 (d,  $J$  = 2.7 Hz), 93.6 (d,  $J$  = 17.7 Hz). **HRMS** (ESI): Calcd for C<sub>13</sub>H<sub>9</sub>F<sub>2</sub>N<sub>2</sub><sup>+</sup>  $m/z$  231.0728 [M+H]<sup>+</sup>, found 231.0729.

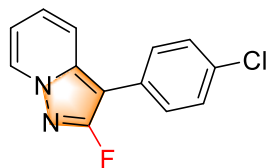

### 3-(4-chlorophenyl)-2-fluoropyrazolo[1,5-a]pyridine (4k)

Purification by flash column chromatography on silica gel (EA/petroleum ether = 1:4), White solid; Yield = 86 mg (70%); mp 133 - 135 °C. **<sup>1</sup>H NMR** (400 MHz, CDCl<sub>3</sub>),  $\delta$ : 8.30 (d,  $J$  = 6.8 Hz, 1H), 7.64 (d,  $J$  = 9.2 Hz, 1H), 7.52 (d,  $J$  = 8.4 Hz, 2H), 7.42 (d,  $J$  = 8.4 Hz, 2H), 7.26 - 7.22 (m, 1H), 6.82 (t,  $J$  = 6.8 Hz, 1H). **<sup>19</sup>F NMR** (376 MHz, CDCl<sub>3</sub>),  $\delta$ : -129.88 (s). **<sup>13</sup>C NMR** (150 MHz, CDCl<sub>3</sub>),  $\delta$ : 162.9 (d,  $J$  = 247.9 Hz), 138.4 (d,  $J$  = 0.9 Hz), 132.2, 129.1, 129.1, 128.6, 128.6, 125.5, 116.5 (d,  $J$  = 3.6 Hz), 112.1 (d,  $J$  = 2.7 Hz), 93.4 (d,  $J$  = 17.5 Hz). **HRMS** (ESI): Calcd for C<sub>13</sub>H<sub>9</sub>ClFN<sub>2</sub><sup>+</sup>  $m/z$  247.0433 [M+H]<sup>+</sup>, found 247.0436.

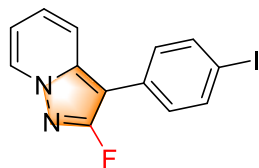

### 2-fluoro-3-(4-iodophenyl)pyrazolo[1,5-*a*]pyridine (4l)

Purification by flash column chromatography on silica gel (EA/petroleum ether = 1:4), White solid; Yield = 84 mg (50%); mp 90 - 92 °C. **<sup>1</sup>H NMR** (400 MHz, CDCl<sub>3</sub>), δ: 8.30 (d, *J* = 7.2 Hz, 1H), 7.77 (d, *J* = 8.4 Hz, 2H), 7.64 (d, *J* = 9.2 Hz, 1H), 7.33 (d, *J* = 8.0 Hz, 2H), 7.17 (t, *J* = 7.6 Hz, 1H), 6.82 (t, *J* = 7.2 Hz, 1H). **<sup>19</sup>F NMR** (376 MHz, CDCl<sub>3</sub>), δ: -129.54 (s). **<sup>13</sup>C NMR** (150 MHz, CDCl<sub>3</sub>), δ: 162.9 (d, *J* = 248.1 Hz), 138.3 (d, *J* = 1.3 Hz), 138.0, 129.7 (d, *J* = 4.2 Hz), 129.1 (d, *J* = 2.1 Hz), 125.6, 116.5 (d, *J* = 3.6 Hz), 112.2 (d, *J* = 2.7 Hz), 93.5 (d, *J* = 17.4 Hz), 91.4. **HRMS** (ESI): Calcd for C<sub>13</sub>H<sub>9</sub>FIN<sub>2</sub><sup>+</sup> *m/z* 338.9789 [M+H]<sup>+</sup>, found 338.9789.

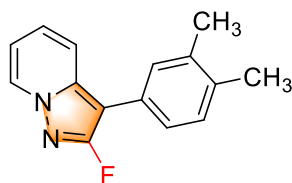

### 3-(3,4-dimethylphenyl)-2-fluoropyrazolo[1,5-*a*]pyridine (4m)

Purification by flash column chromatography on silica gel (EA/petroleum ether = 1:4), White solid; Yield = 96 mg (80%); mp 61 - 62 °C. **<sup>1</sup>H NMR** (400 MHz, CDCl<sub>3</sub>), δ: 8.28 (d, *J* = 7.2 Hz, 1H), 7.67 (d, *J* = 9.2 Hz, 1H), 7.37 (s, 1H), 7.33 (d, *J* = 8.0 Hz, 1H), 7.25 - 7.17 (m, 2H), 6.78 (t, *J* = 7.2 Hz, 1H), 2.33 (s, 3H), 2.31 (s, 3H). **<sup>19</sup>F NMR** (376 MHz, CDCl<sub>3</sub>), δ: -130.45 (s). **<sup>13</sup>C NMR** (150 MHz, CDCl<sub>3</sub>), δ: 162.9 (d, *J* = 247.5 Hz), 138.5 (d, *J* = 1.8 Hz), 137.2, 135.0, 130.2, 128.9, 128.8 (d, *J* = 2.1 Hz), 127.5 (d, *J* = 4.0 Hz), 125.0 (d, *J* = 1.9 Hz), 124.8, 116.9 (d, *J* = 3.7 Hz), 111.7 (d, *J* = 2.8 Hz), 94.5 (d, *J* = 17.7 Hz), 19.9, 19.5. **HRMS** (ESI): Calcd for C<sub>15</sub>H<sub>14</sub>FN<sub>2</sub><sup>+</sup> *m/z* 241.1136 [M+H]<sup>+</sup>, found 241.1136.

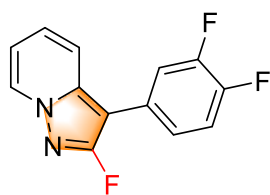

### 3-(3,4-difluorophenyl)-2-fluoropyrazolo[1,5-a]pyridine (4n)

Purification by flash column chromatography on silica gel (EA/petroleum ether = 1:4), White solid; Yield = 68 mg (55%); mp 87 - 89 °C. **<sup>1</sup>H NMR** (400 MHz, CDCl<sub>3</sub>), δ: 8.32 (d, *J* = 7.6 Hz, 1H), 7.65 (d, *J* = 8.8 Hz, 1H), 7.42 - 7.40 (m, 1H), 7.34 - 7.20 (m, 3H), 6.85 (t, *J* = 6.8 Hz, 1H). **<sup>19</sup>F NMR** (376 MHz, CDCl<sub>3</sub>), δ: -127.99 (s), -137.08 (m), -140.19 (m). **<sup>13</sup>C NMR** (150 MHz, CDCl<sub>3</sub>), δ: 162.8 (d, *J* = 247.6 Hz), 151.4 (d, *J* = 12.9 Hz), 149.7 (dd, *J* = 2.5 Hz, *J* = 12.6 Hz), 148.2 (d, *J* = 12.7 Hz), 138.4, 129.2, 127.1 (d, *J* = 6.9 Hz), 125.8, 123.5 - 123.4 (m), 117.8 (d, *J* = 17.4 Hz), 116.3 (t, *J* = 7.8 Hz), 112.2 (d, *J* = 2.8 Hz), 92.7 (d, *J* = 17.4 Hz). **HRMS** (ESI): Calcd for C<sub>13</sub>H<sub>8</sub>F<sub>3</sub>N<sub>2</sub><sup>+</sup> m/z 249.0634 [M+H]<sup>+</sup>, found 249.0625.

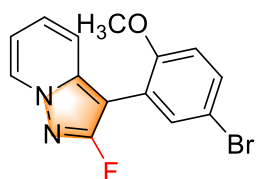

### 3-(5-bromo-2-methoxyphenyl)-2-fluoropyrazolo[1,5-a]pyridine (4o)

Purification by flash column chromatography on silica gel (EA/petroleum ether = 1:4), White solid; Yield = 120 mg (75%); mp 81 - 83 °C. **<sup>1</sup>H NMR** (600 MHz, CDCl<sub>3</sub>), δ: 8.28 (d, *J* = 6.6 Hz, 1H), 7.52 (d, *J* = 3.0 Hz, 1H), 7.42 (dd, *J* = 2.4, *J* = 9.0 Hz, 1H), 7.38 (d, *J* = 9.0 Hz, 1H), 7.18 (t, *J* = 7.8 Hz, 1H), 6.88 (d, *J* = 9.0 Hz, 1H), 6.78 (t, *J* = 7.2 Hz, 1H), 3.82 (s, 3H). **<sup>19</sup>F NMR** (376 MHz, CDCl<sub>3</sub>), δ: -127.55 (s). **<sup>13</sup>C NMR** (150 MHz, CDCl<sub>3</sub>), δ: 163.0 (d, *J* = 248.1 Hz), 156.0, 139.3 (d, *J* = 1.8 Hz), 133.4 (d, *J* = 1.0 Hz), 131.2, 128.7, 124.7, 120.7 (d, *J* = 3.9 Hz), 117.7 (d, *J* = 3.6 Hz), 112.9, 112.8, 111.8 (d, *J* = 2.7 Hz), 89.9 (d, *J* = 19.2 Hz), 55.7. **HRMS** (ESI): Calcd for C<sub>14</sub>H<sub>10</sub>BrFN<sub>2</sub>ONa<sup>+</sup> m/z 344.9832 [M+Na]<sup>+</sup>, found 344.9830.

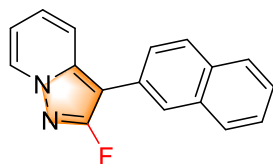

#### 2-fluoro-3-(naphthalen-2-yl)pyrazolo[1,5-a]pyridine (4p)

Purification by flash column chromatography on silica gel (EA/petroleum ether = 1:4), Yellow oil; Yield = 94 mg (72%).  $^1\text{H NMR}$  (600 MHz,  $\text{CDCl}_3$ ),  $\delta$ : 8.35 (d,  $J = 6.8$  Hz, 1H), 7.92 - 7.80 (m, 3H), 7.61 - 7.41 (m, 4H), 7.25 (d,  $J = 8.8$  Hz, 1H), 7.12 (t,  $J = 7.2$  Hz, 1H), 6.79 (t,  $J = 6.8$  Hz, 1H).  $^{19}\text{F NMR}$  (376 MHz,  $\text{CDCl}_3$ ),  $\delta$ : -128.55 (s).  $^{13}\text{C NMR}$  (150 MHz,  $\text{CDCl}_3$ ),  $\delta$ : 163.3 (d,  $J = 247.5$  Hz), 140.0 (d,  $J = 2.1$  Hz), 134.0, 132.0, 128.8, 128.5, 128.5, 128.3, 126.3, 126.0, 125.7 (d,  $J = 1.0$  Hz), 125.5, 124.9, 122.4, 117.1 (d,  $J = 3.7$  Hz), 111.9 (d,  $J = 2.8$  Hz), 92.9 (d,  $J = 20.2$  Hz). **HRMS** (ESI): Calcd for  $\text{C}_{17}\text{H}_{12}\text{FN}_2^+$   $m/z$  263.0979  $[\text{M}+\text{H}]^+$ , found 263.0980.

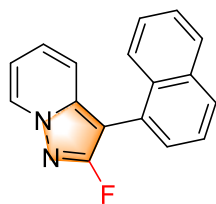

#### 2-fluoro-3-(naphthalen-1-yl)pyrazolo[1,5-a]pyridine (4q)

Purification by flash column chromatography on silica gel (EA/petroleum ether = 1:4), White solid; Yield = 84 mg (64%); mp 98 - 100 °C.  $^1\text{H NMR}$  (400 MHz,  $\text{CDCl}_3$ ),  $\delta$ : 8.32 (d,  $J = 7.2$  Hz, 1H), 8.02 (s, 1H), 7.92 (d,  $J = 8.4$  Hz, 1H), 7.85 (t,  $J = 6.0$  Hz, 2H), 7.78 (d,  $J = 8.8$  Hz, 1H), 7.73 (d,  $J = 8.8$  Hz, 1H), 7.52 - 7.45 (m, 2H), 7.26 - 7.22 (m, 1H), 6.81 (t,  $J = 7.2$  Hz, 1H).  $^{19}\text{F NMR}$  (376 MHz,  $\text{CDCl}_3$ ),  $\delta$ : -129.76 (s).  $^{13}\text{C NMR}$  (150 MHz,  $\text{CDCl}_3$ ),  $\delta$ : 163.2 (d,  $J = 247.9$  Hz), 138.7 (d,  $J = 1.6$  Hz), 133.7, 132.0, 129.1, 128.6, 127.8, 127.7, 127.6 (d,  $J = 4.0$  Hz), 126.4, 125.9 (d,  $J = 1.9$  Hz), 125.8 (d,  $J = 2.1$  Hz), 125.8, 125.3, 116.8 (d,  $J = 3.6$  Hz), 112.0 (d,  $J = 2.8$  Hz), 94.6 (d,  $J = 17.4$  Hz). **HRMS** (ESI): Calcd for  $\text{C}_{17}\text{H}_{12}\text{FN}_2^+$   $m/z$  263.0979  $[\text{M}+\text{H}]^+$ , found 263.0980.

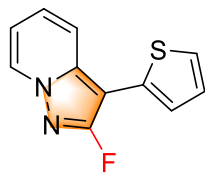

**2-fluoro-3-(thiophen-2-yl)pyrazolo[1,5-a]pyridine (4r)**

Purification by flash column chromatography on silica gel (EA/petroleum ether = 1:4), Yellow oil; Yield = 57 mg (52%). **<sup>1</sup>H NMR** (600 MHz, CDCl<sub>3</sub>),  $\delta$ : 8.27 (d,  $J$  = 7.2 Hz, 1H), 7.77 (d,  $J$  = 9.0 Hz, 1H), 7.29 -7.28 (m, 2H), 7.26 (t,  $J$  = 8.4 Hz, 1H), 7.13 (t,  $J$  = 4.2 Hz, 1H), 6.81 (t,  $J$  = 6.6 Hz, 1H). **<sup>19</sup>F NMR** (376 MHz, CDCl<sub>3</sub>),  $\delta$ : -127.40 (s). **<sup>13</sup>C NMR** (150 MHz, CDCl<sub>3</sub>),  $\delta$ : 162.5 (d,  $J$  = 248.5 Hz), 137.9 (d,  $J$  = 1.3 Hz), 131.1 (d,  $J$  = 5.4 Hz), 128.9, 127.5, 125.4, 123.9 (d,  $J$  = 3.3 Hz), 123.1 (d,  $J$  = 1.5 Hz), 117.1 (d,  $J$  = 3.6 Hz), 112.1 (d,  $J$  = 2.7 Hz), 89.6 (d,  $J$  = 18.6 Hz). **HRMS** (ESI): Calcd for C<sub>11</sub>H<sub>8</sub>FN<sub>2</sub>S<sup>+</sup> m/z 219.0387 [M+H]<sup>+</sup>, found 219.0390.



## 6. NMR and HRMS spectra copies of compounds 3 and 4

NMR copies of compound 3a:

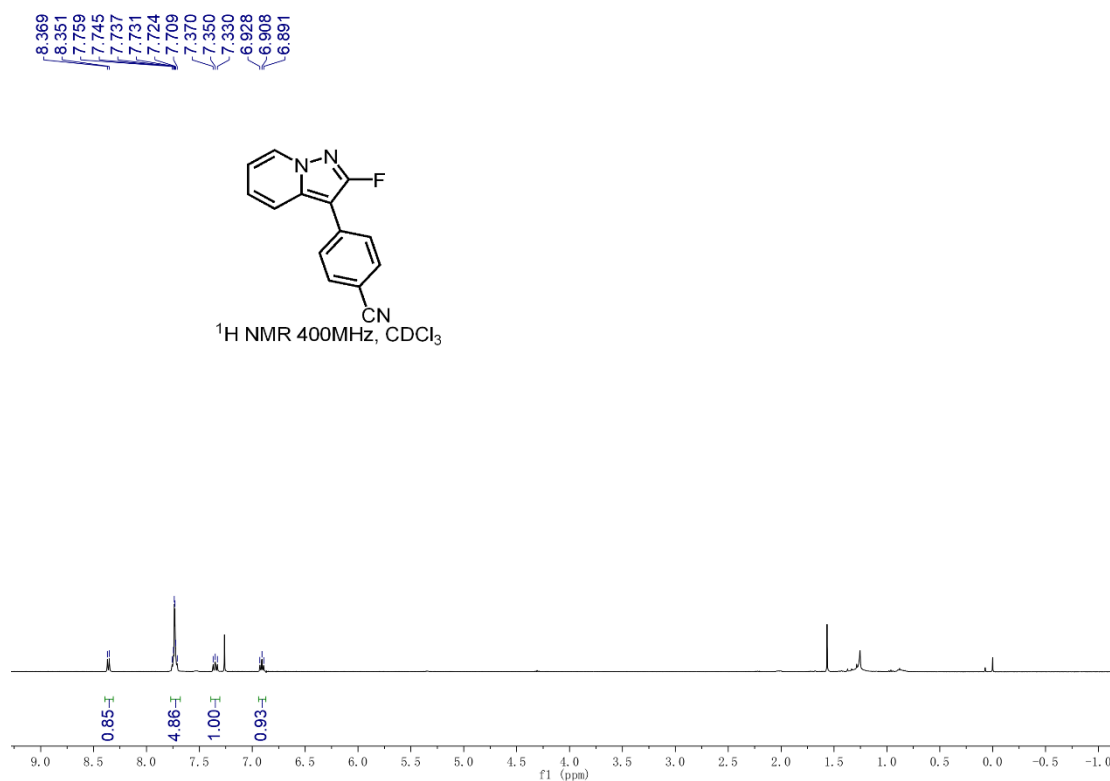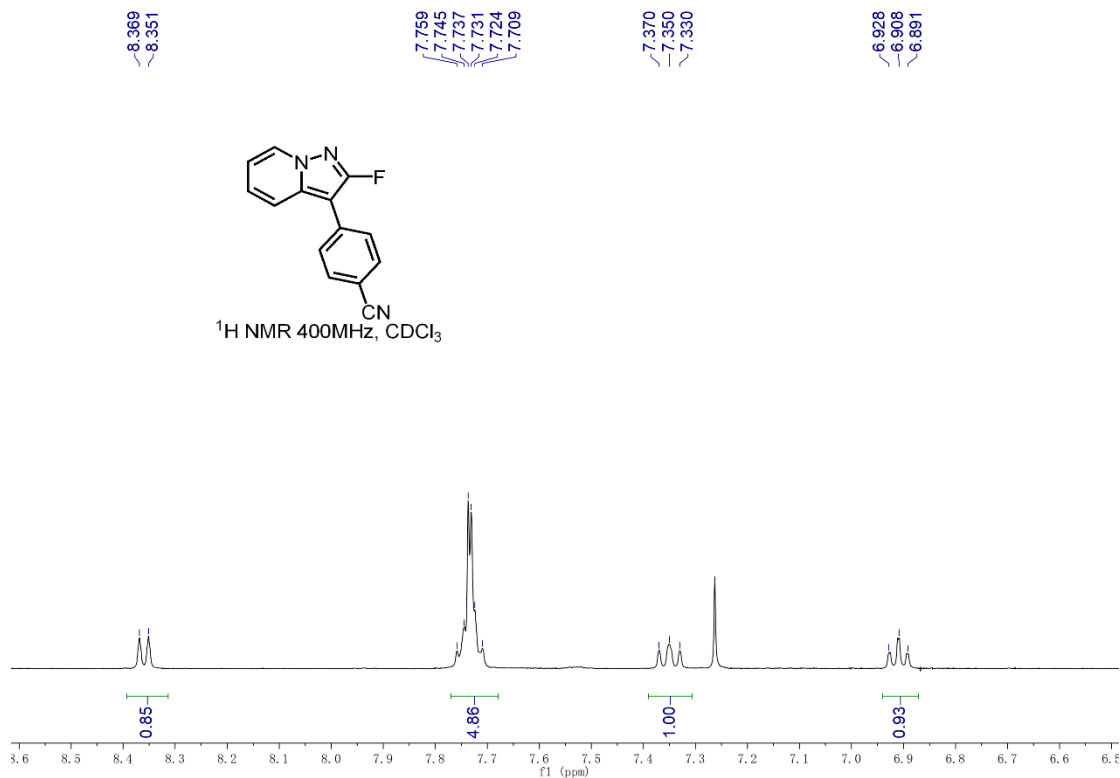

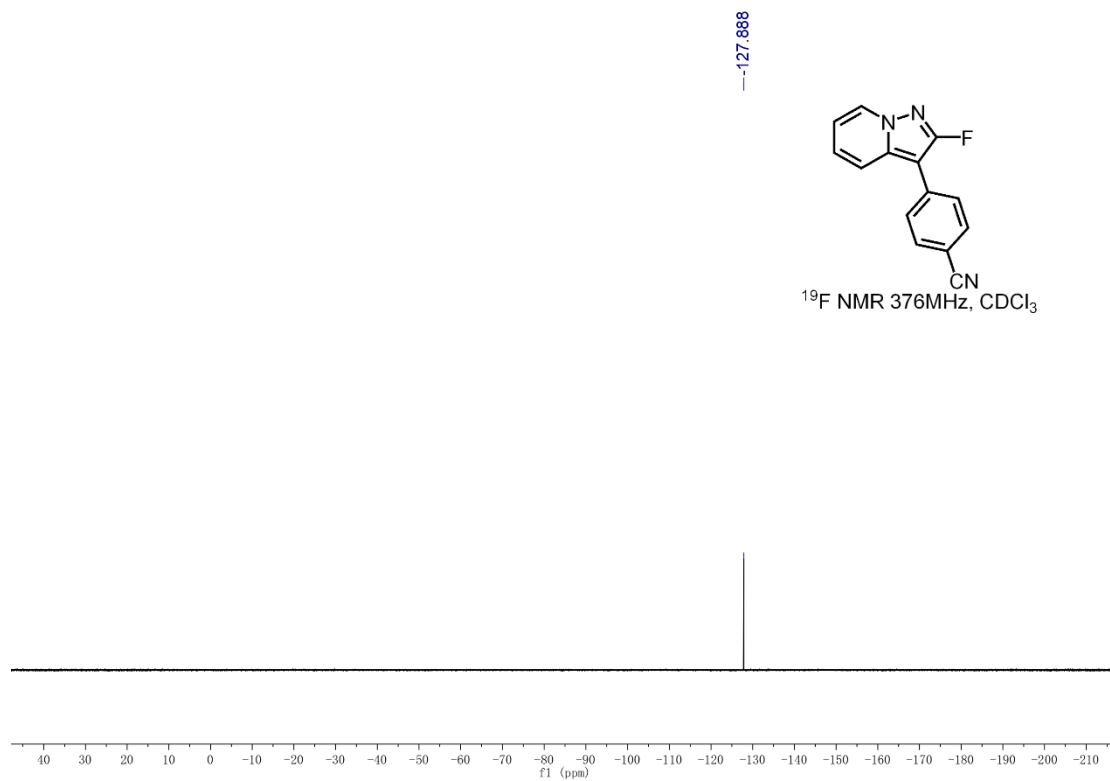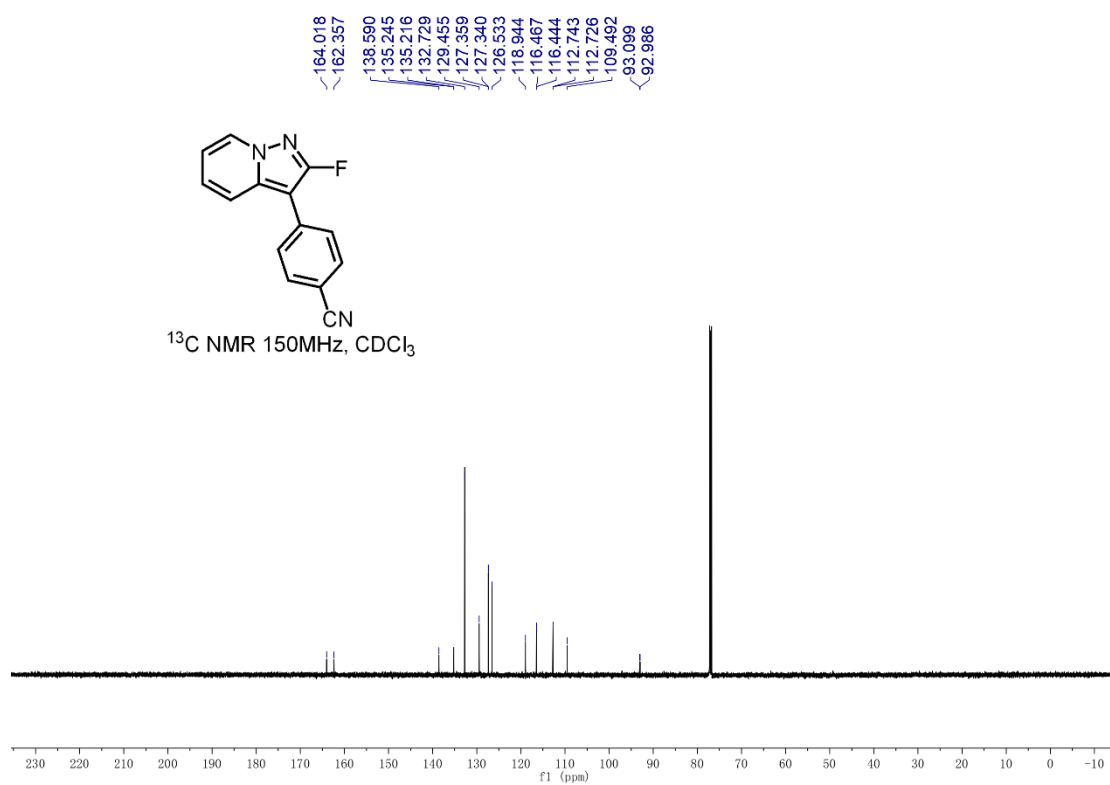

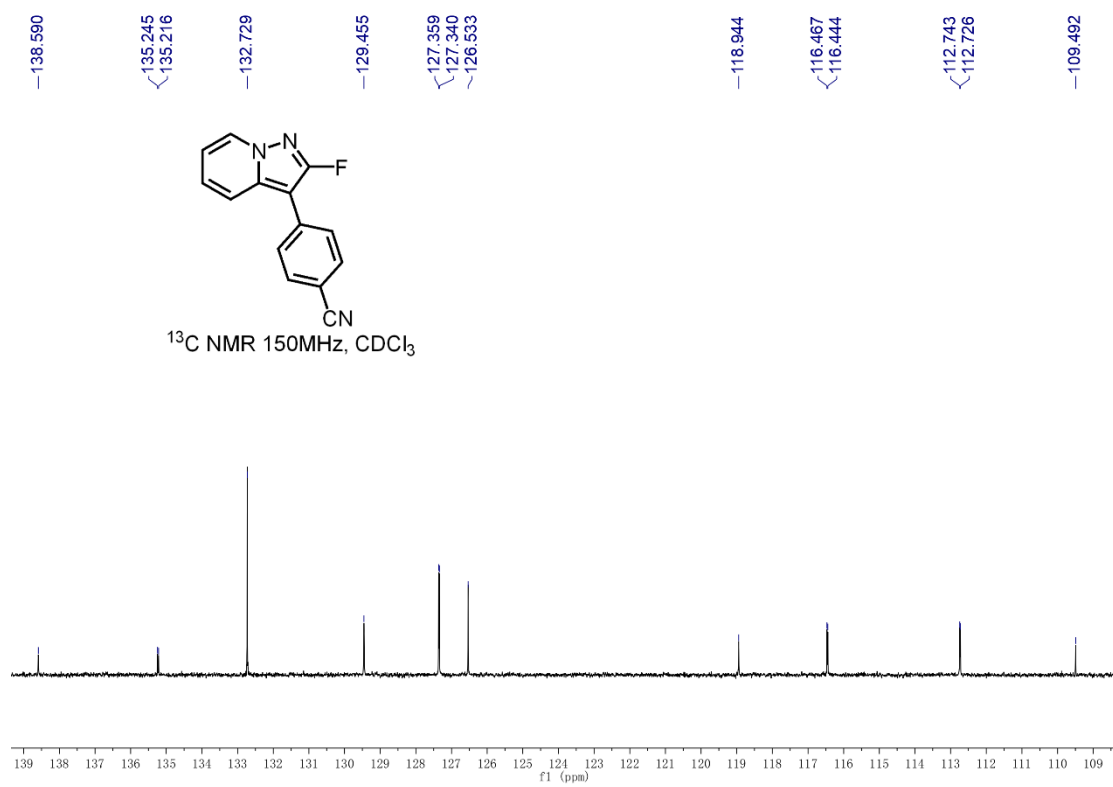

# HRMS (ESI) copy of compound 3a:

G:\FENGYANG-P1

05/31/23 16:14:54

FENGYANG-P1#20-61 RT: 0.09-0.27 AV: 42 NL: 5.02E7  
T: FTMS + p ESI Full lock ms [75.0000-900.0000]

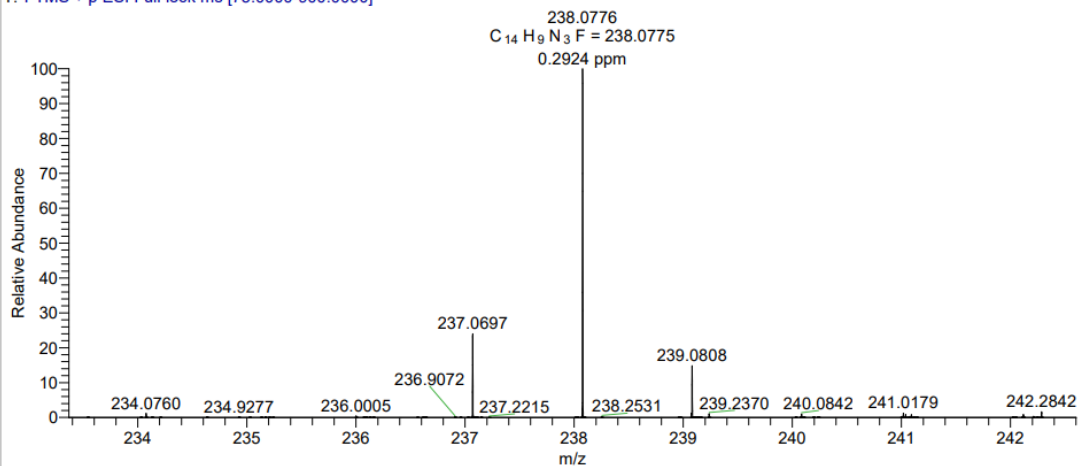

FENGYANG-P1#20-61 RT: 0.09-0.27 AV: 42  
T: FTMS + p ESI Full lock ms [75.0000-900.0000]  
m/z = 233.3671-242.6008

| m/z      | Intensity  | Relative | Theo. Mass | Delta (ppm) | Composition                                     |
|----------|------------|----------|------------|-------------|-------------------------------------------------|
| 237.0697 | 12341680.0 | 24.01    |            |             |                                                 |
| 238.0776 | 51411800.0 | 100.00   | 238.0775   | 0.07        | C <sub>14</sub> H <sub>9</sub> N <sub>3</sub> F |
| 239.0808 | 7644389.5  | 14.87    |            |             |                                                 |
| 242.2842 | 817317.1   | 1.59     |            |             |                                                 |

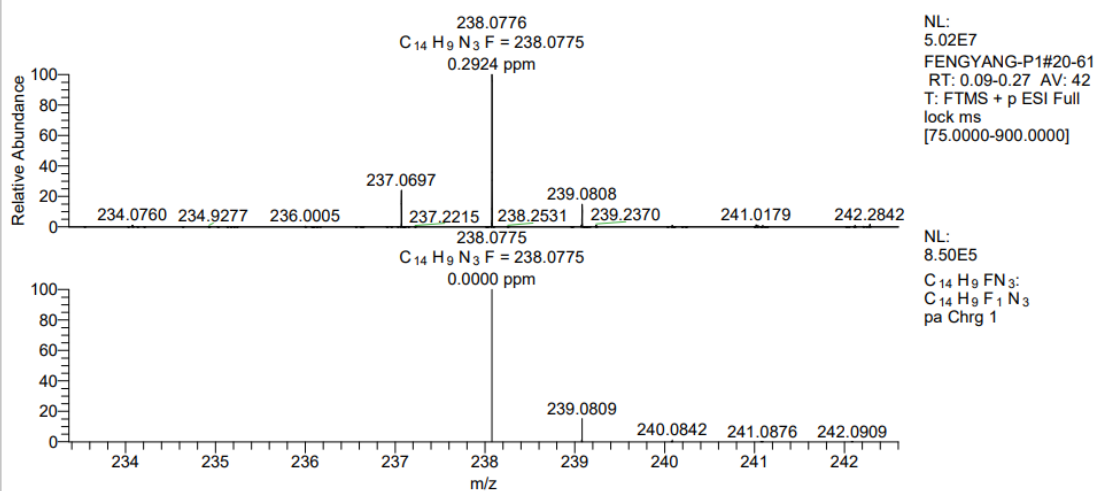

NMR copies of compound **3b**:

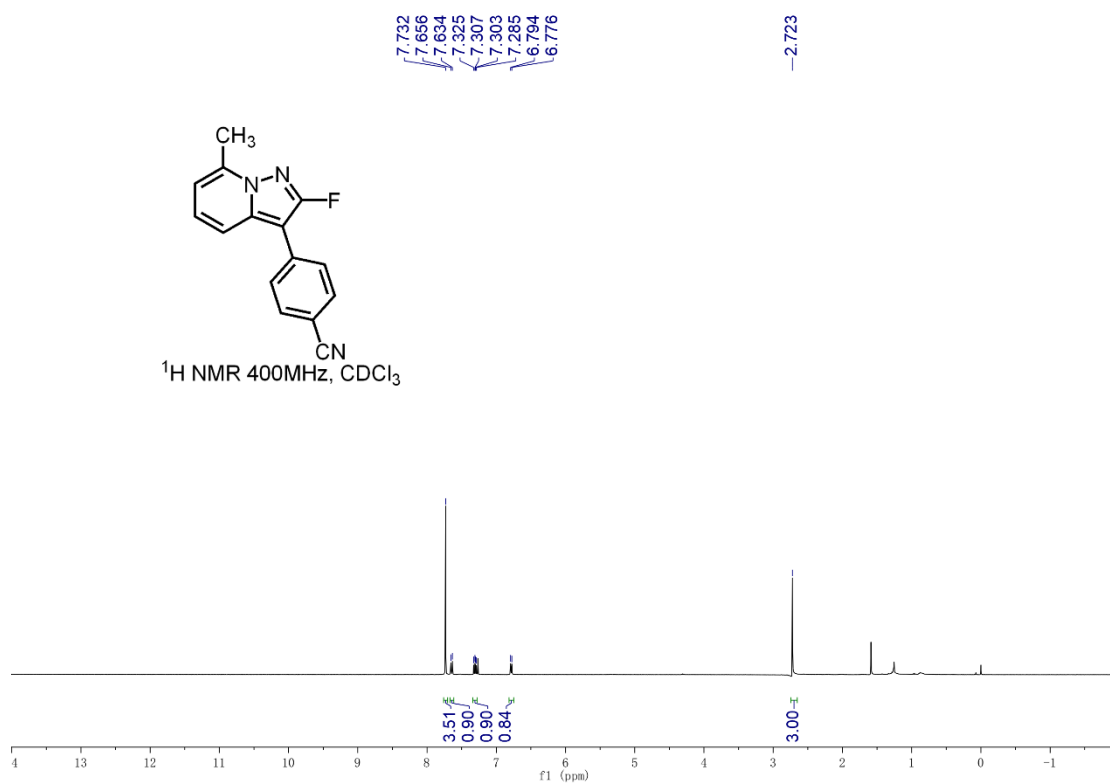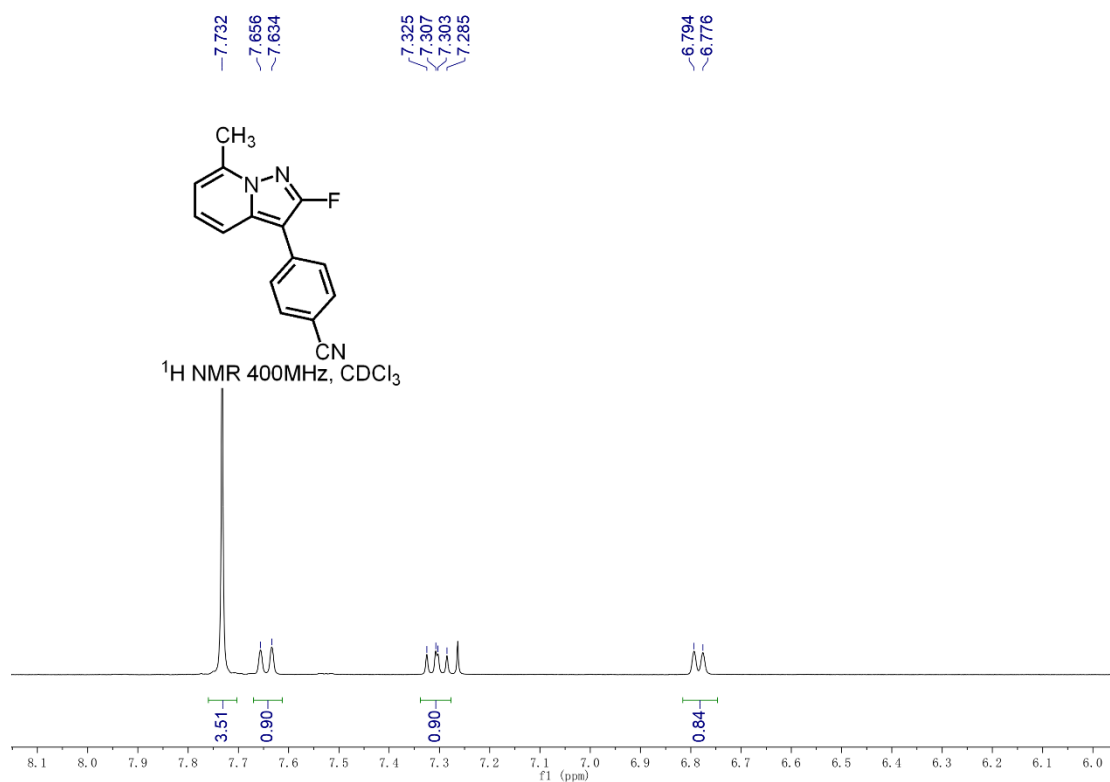

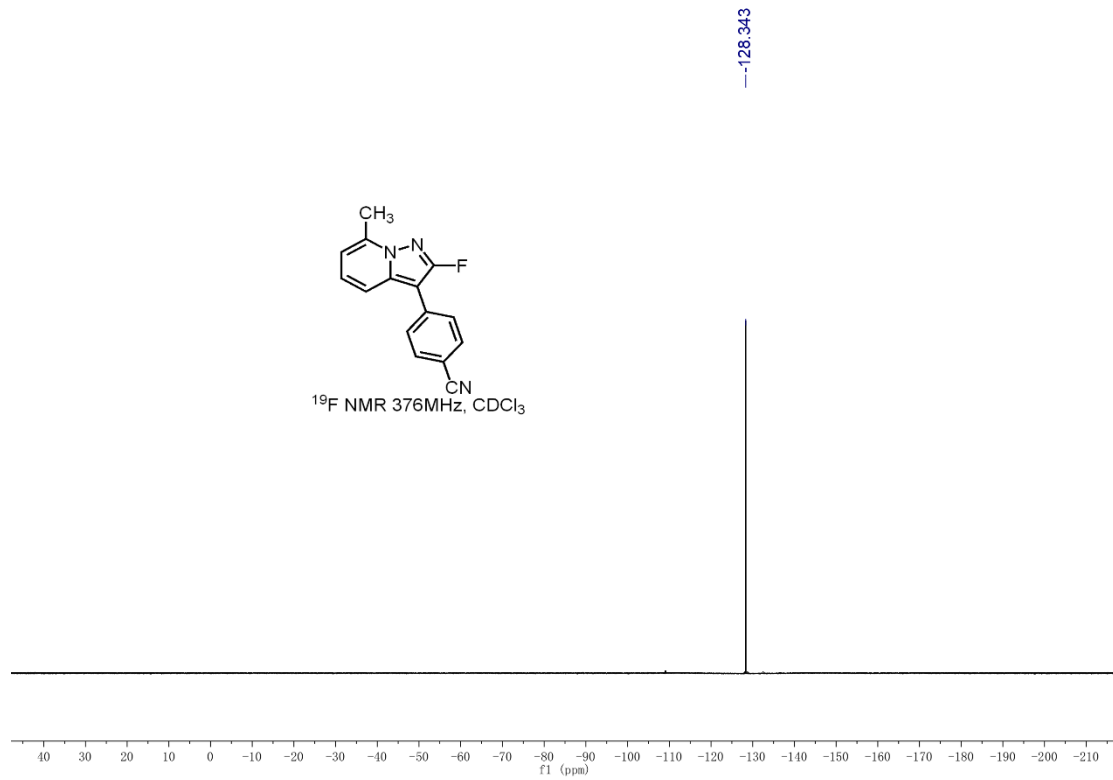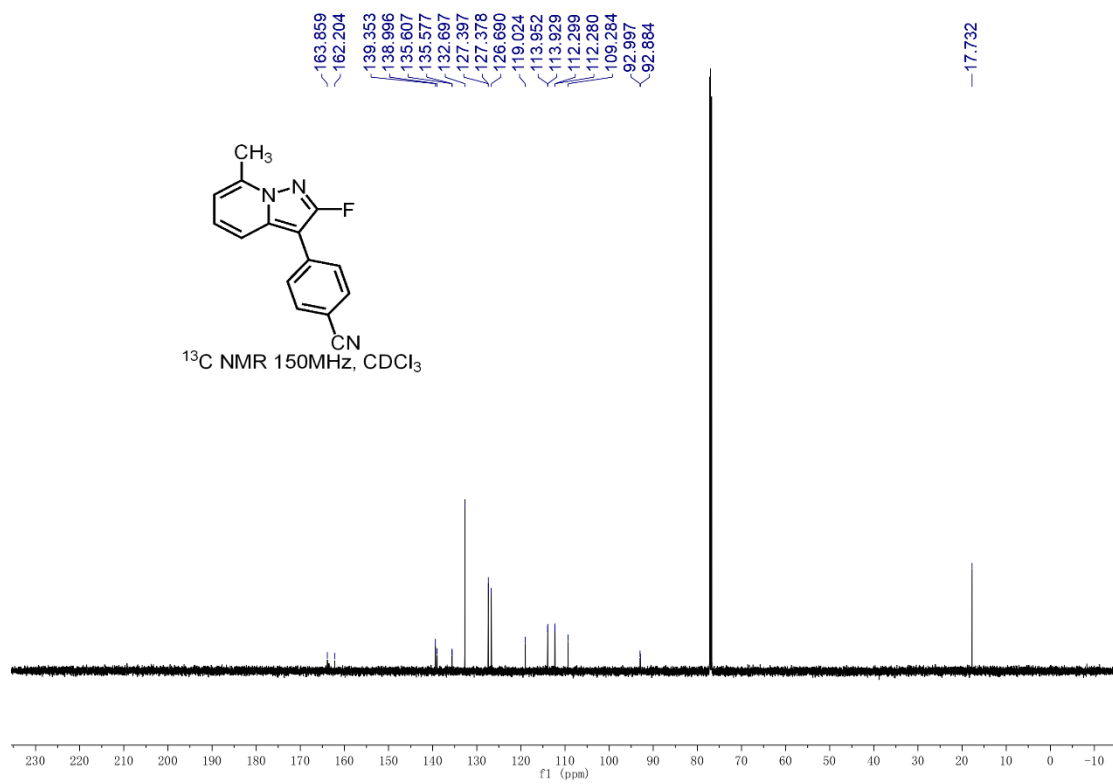

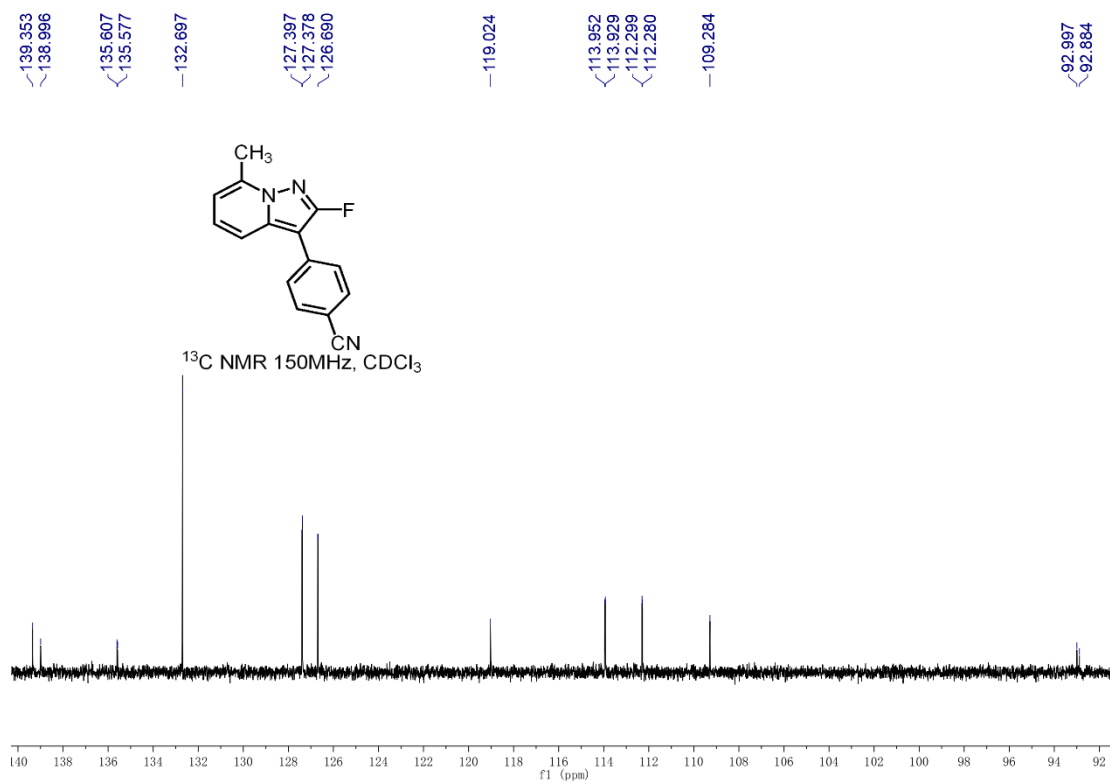

HRMS (ESI) copy of compound **3b**:

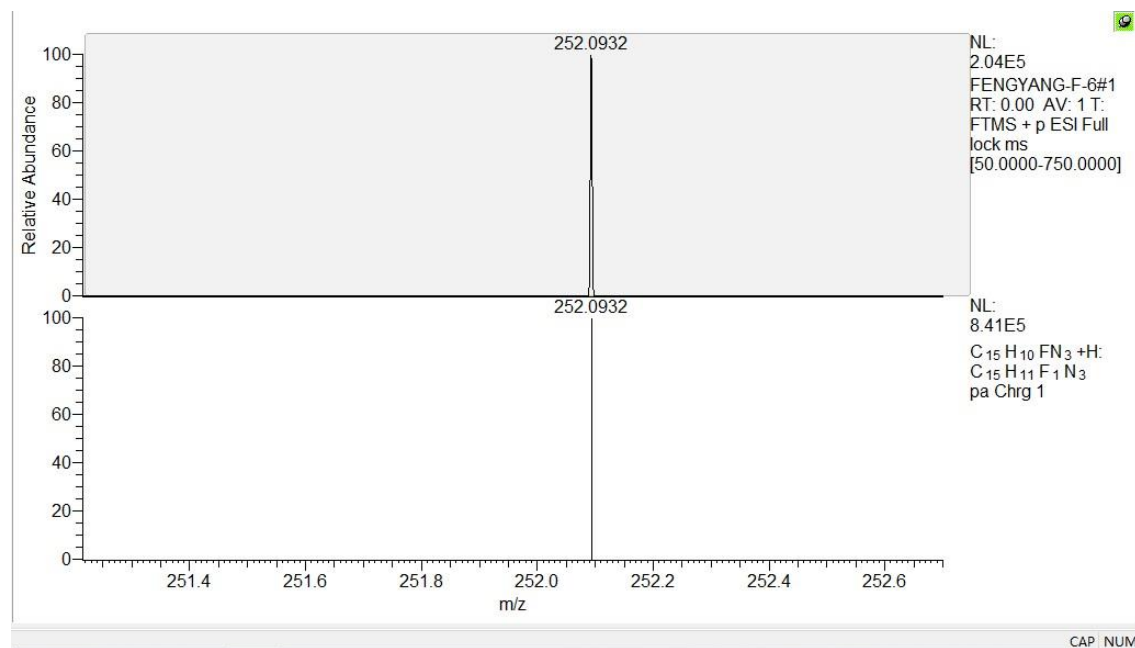

NMR copies of compound **3c**:

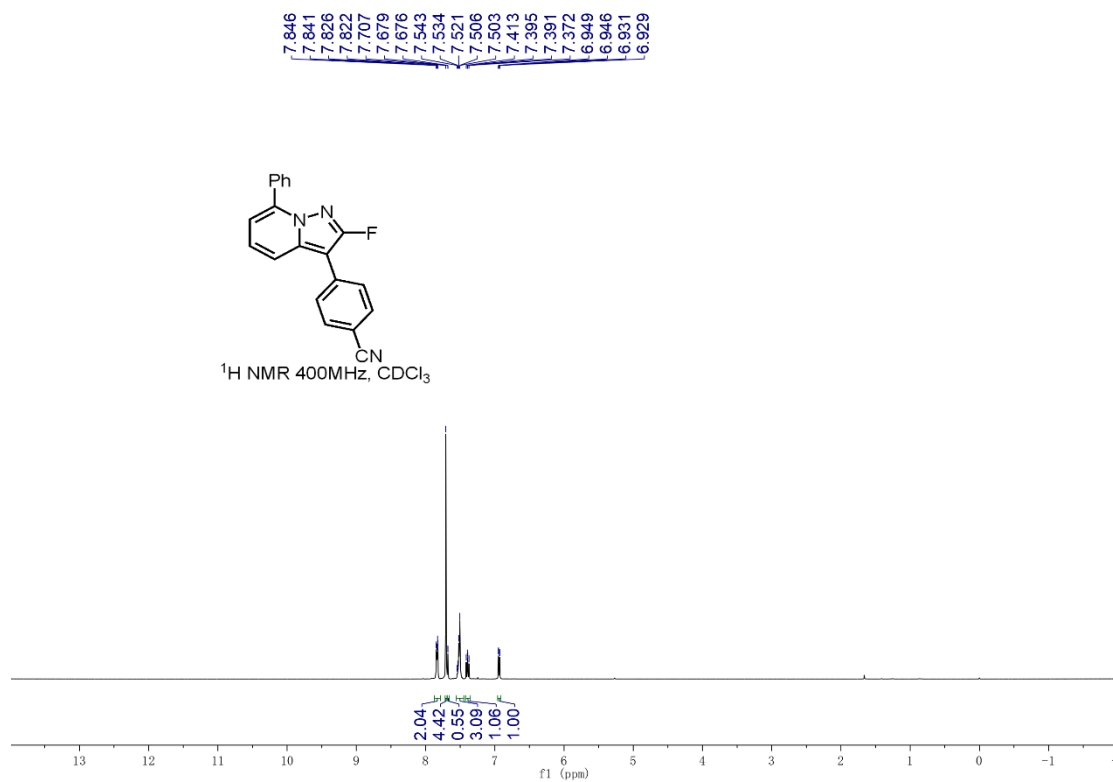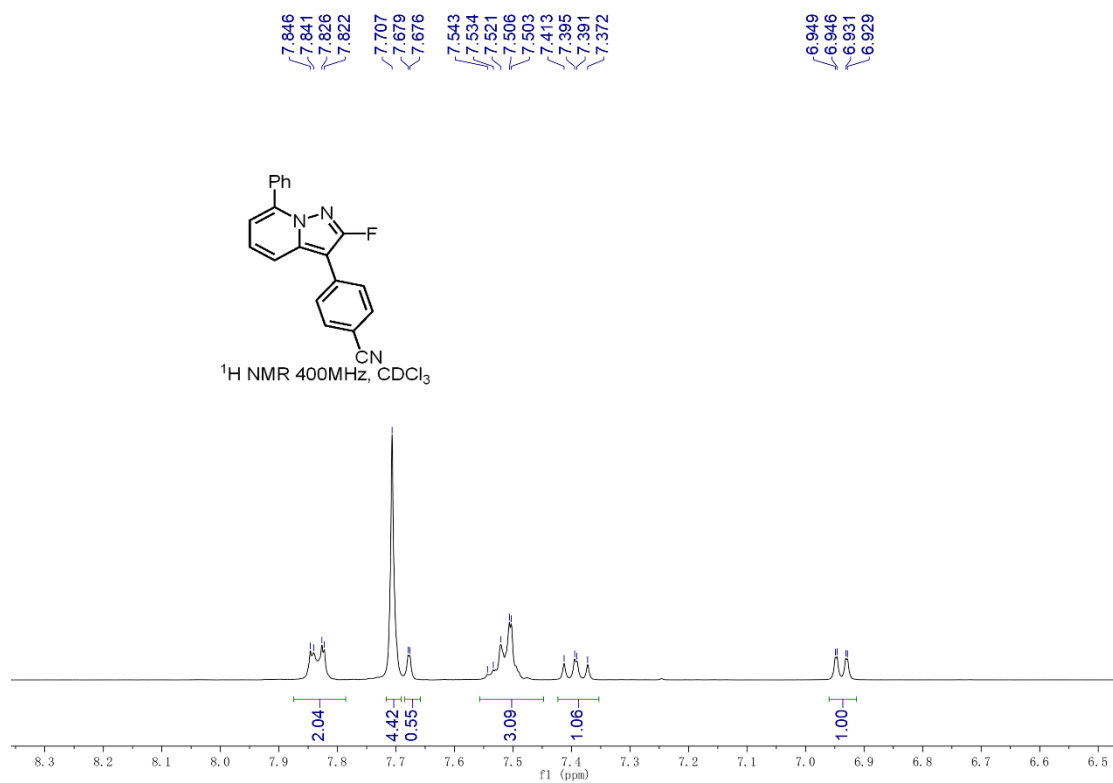



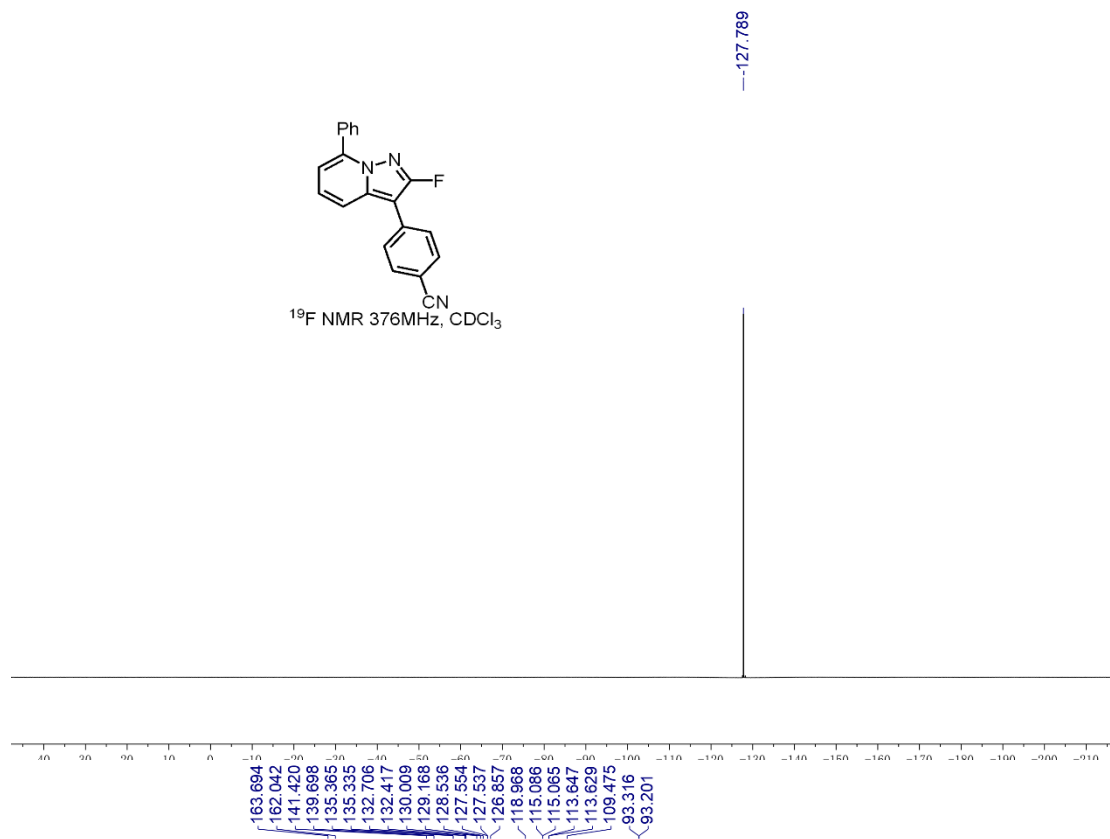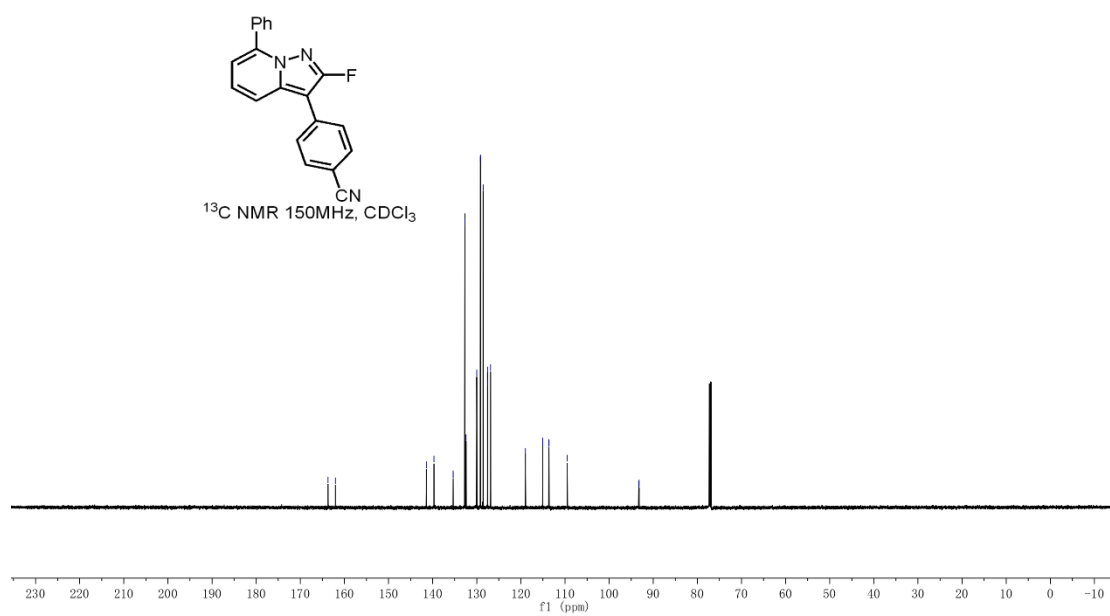

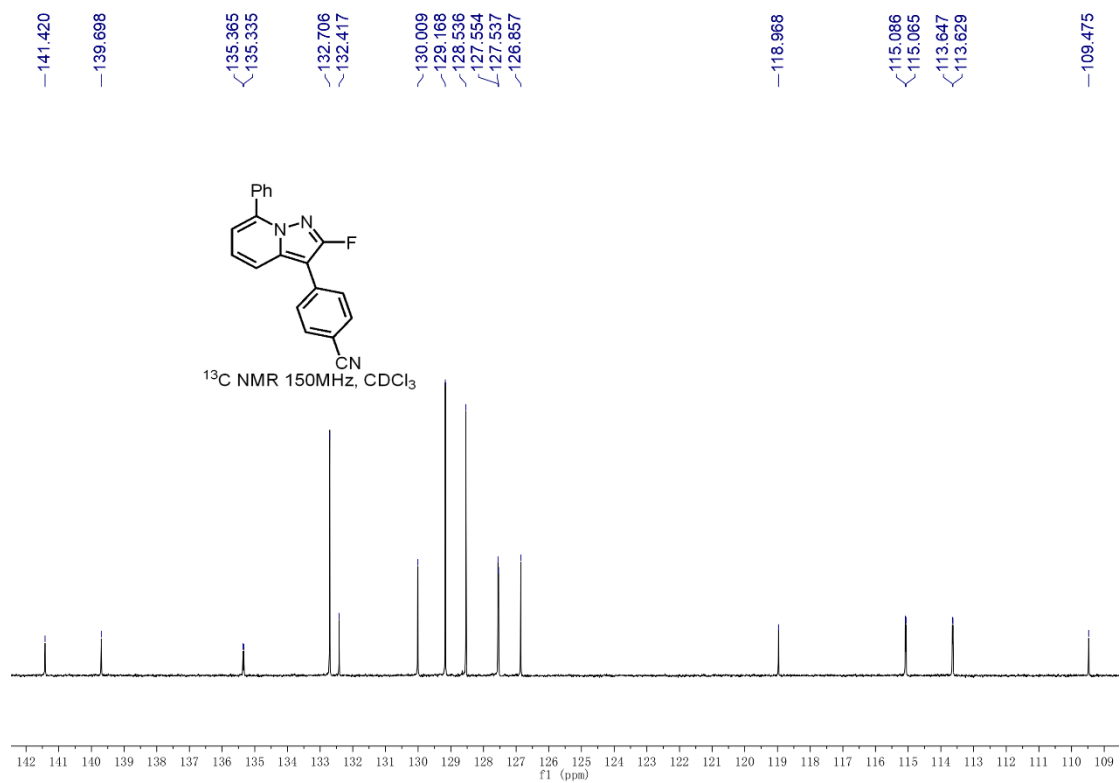

### HRMS (ESI) copy of compound **3c**:

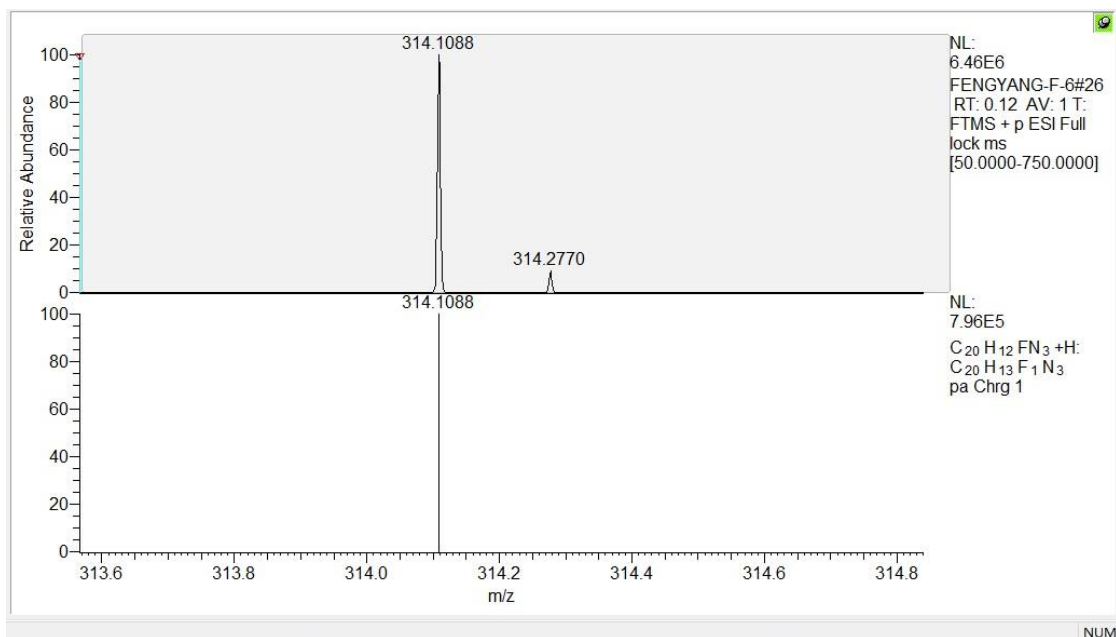

NMR copies of compound **3d**:

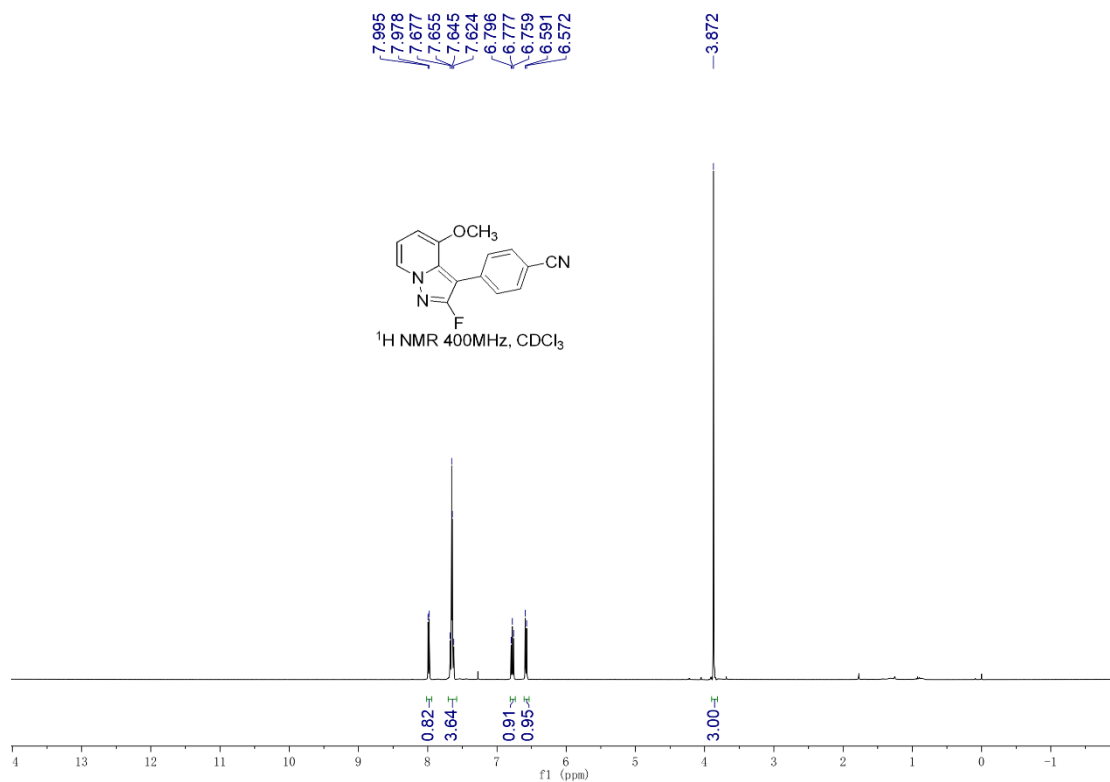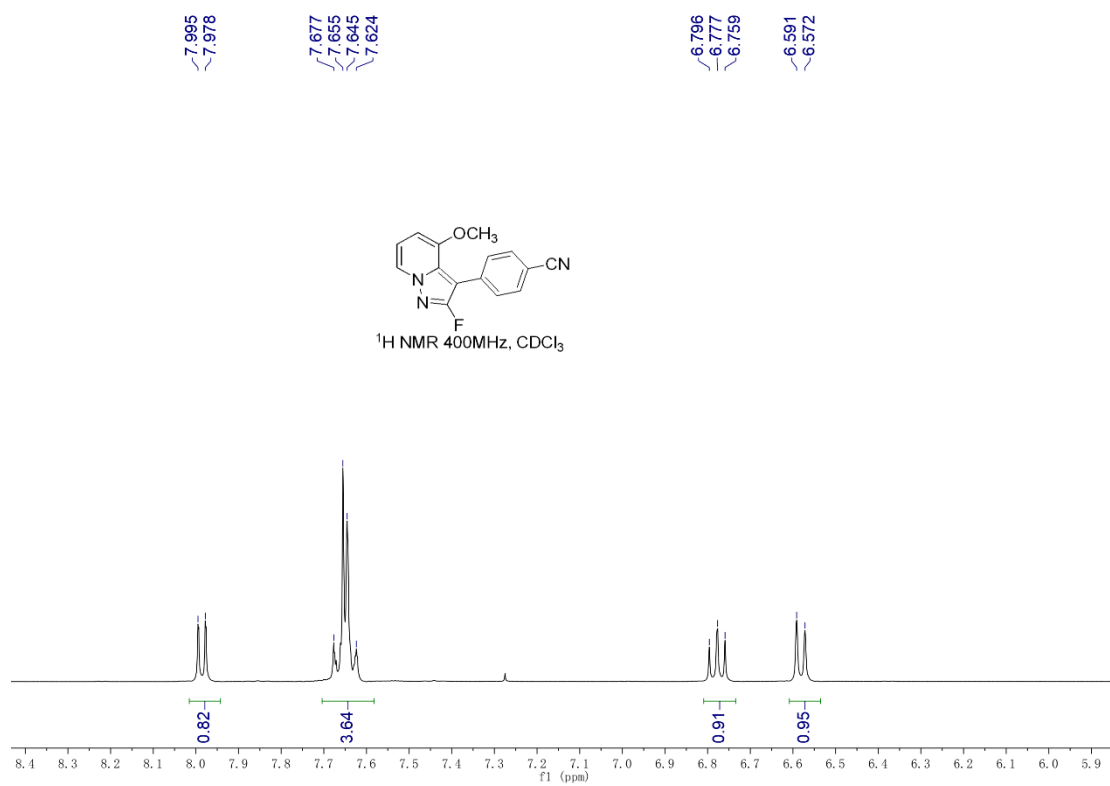

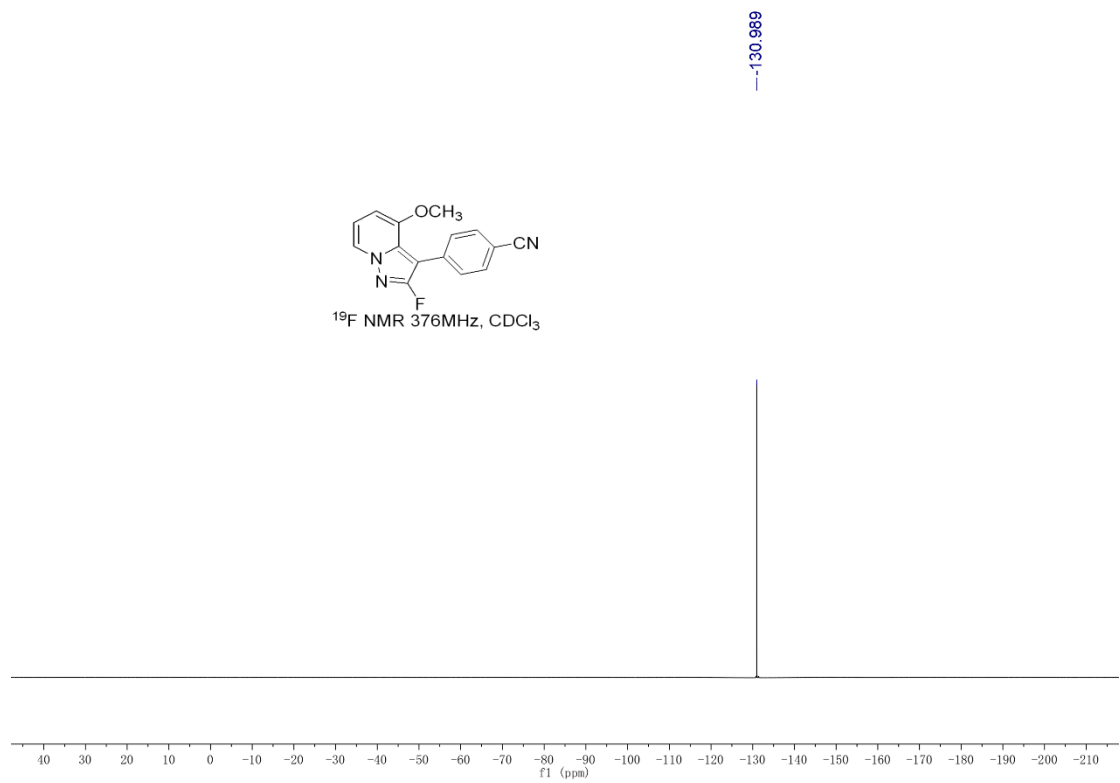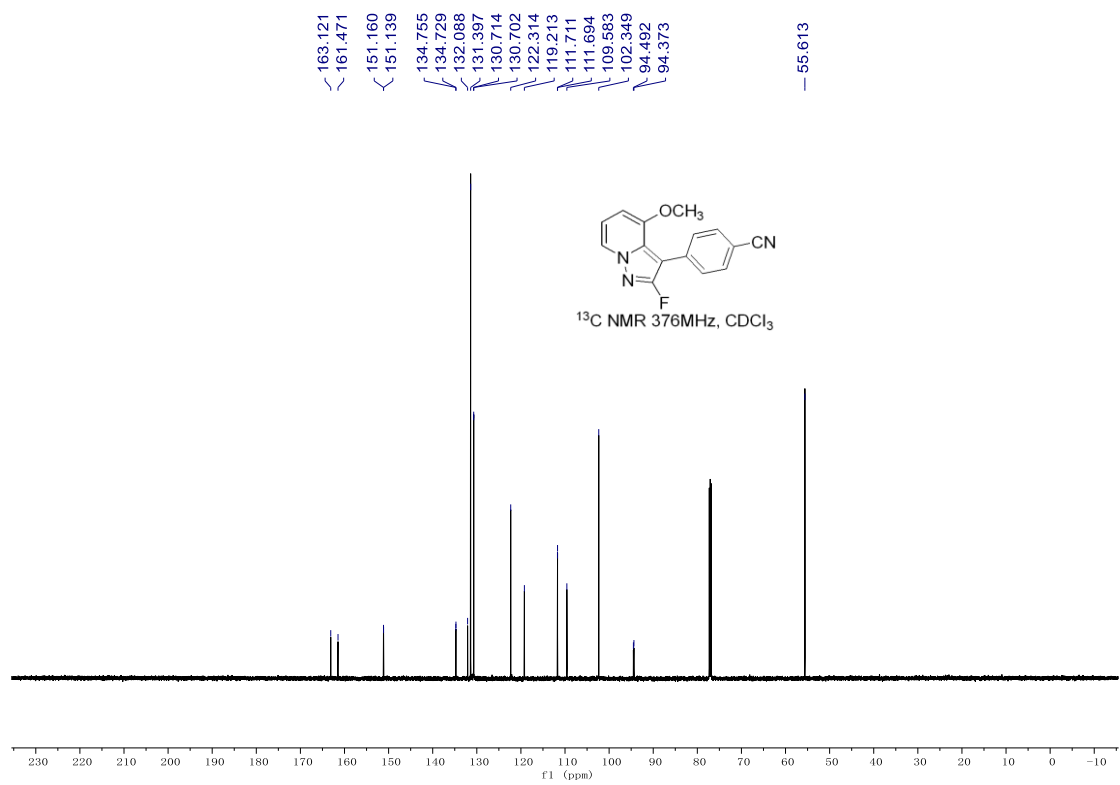

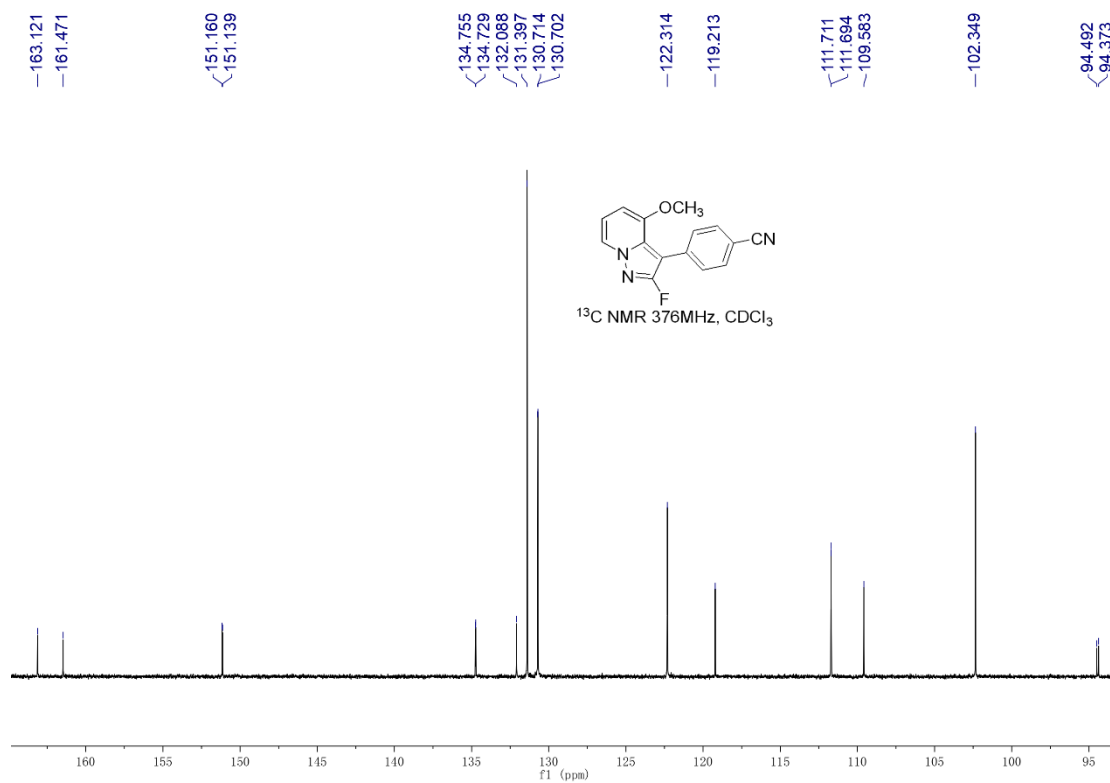

HRMS (ESI) copy of compound **3d**:

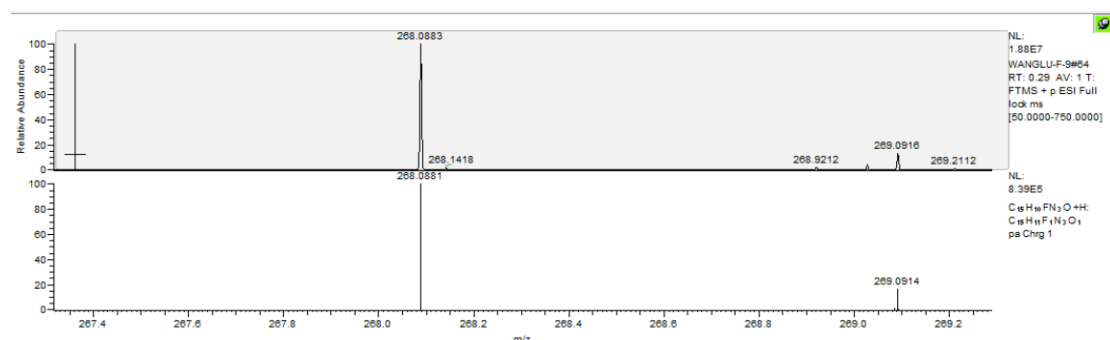

NMR copies of compound **3e**:

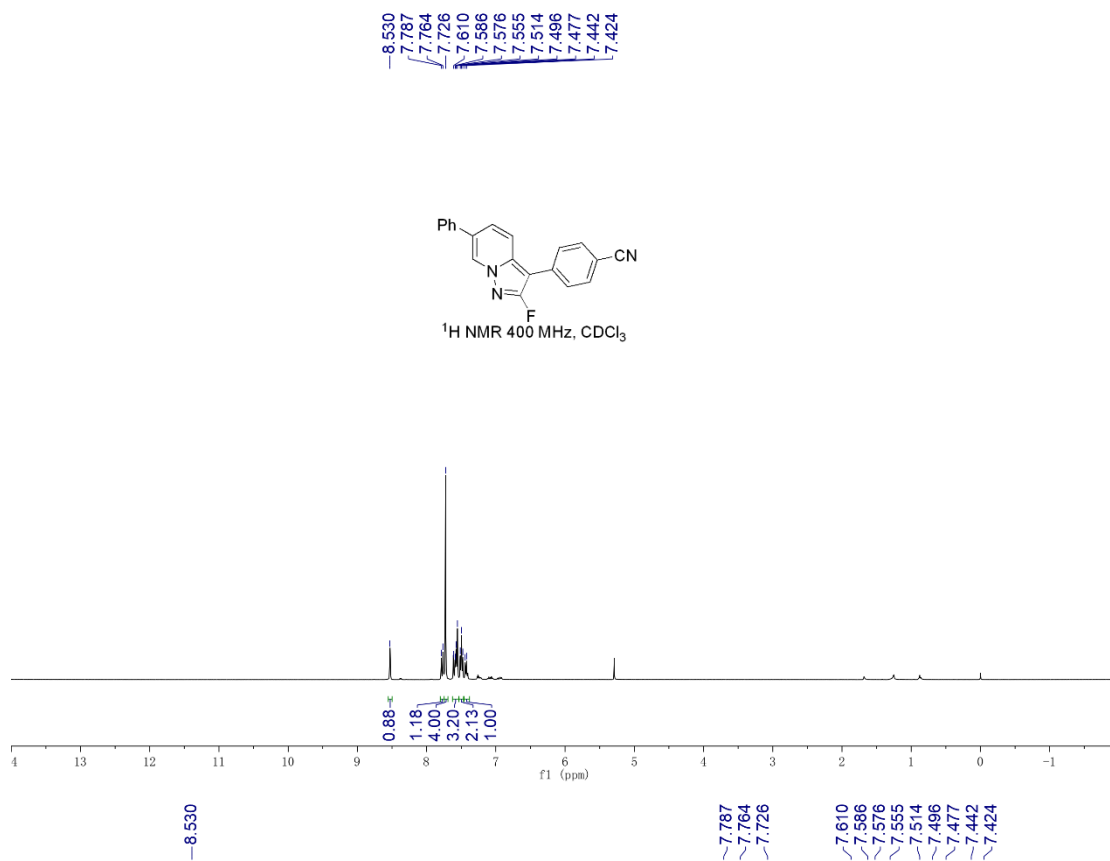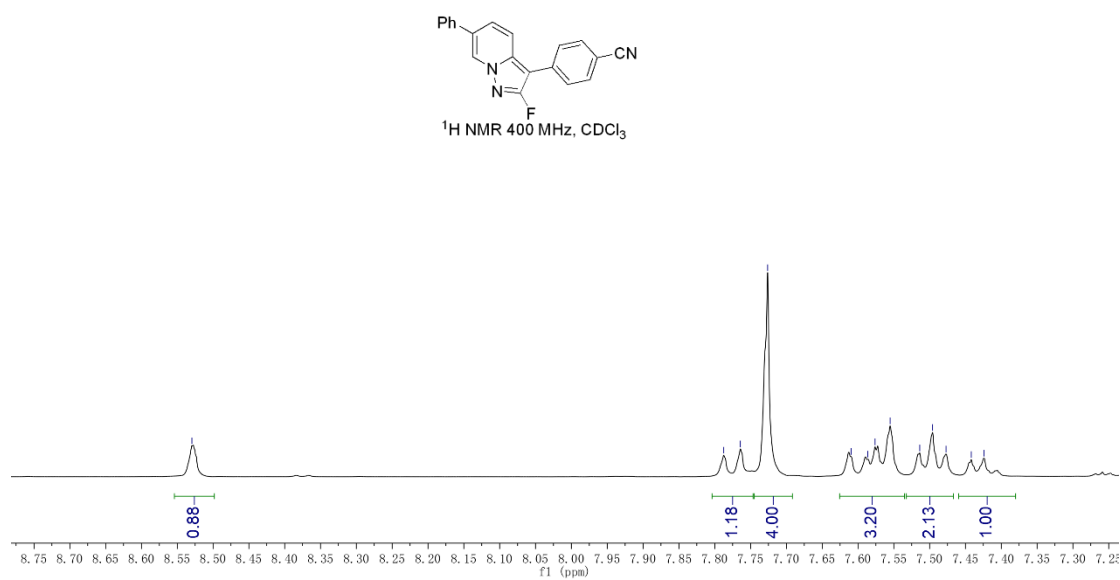

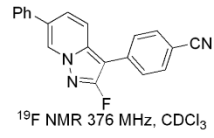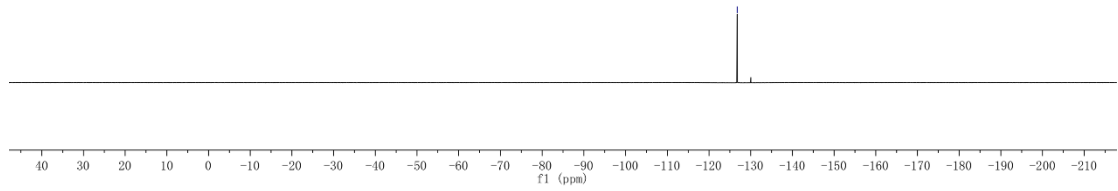

164.185  
162.519  
137.405  
136.212  
135.172  
135.143  
132.761  
129.326  
128.342  
127.263  
127.244  
126.882  
126.726  
126.680  
118.953  
116.419  
116.397  
109.494  
93.128  
93.018

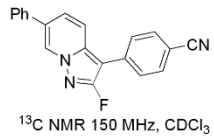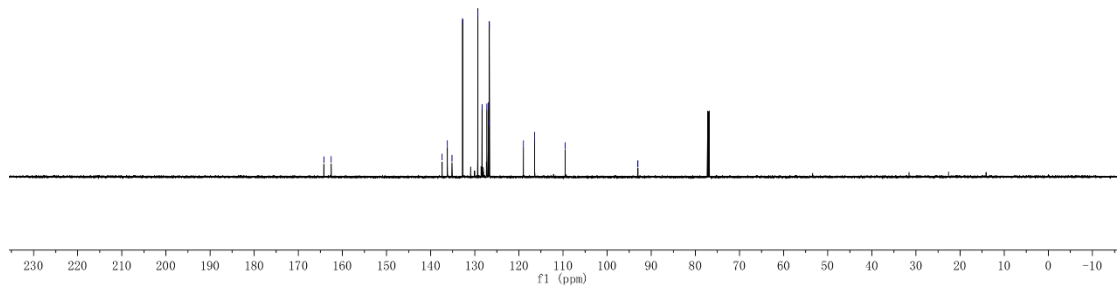





NMR copies of compound **3f**:

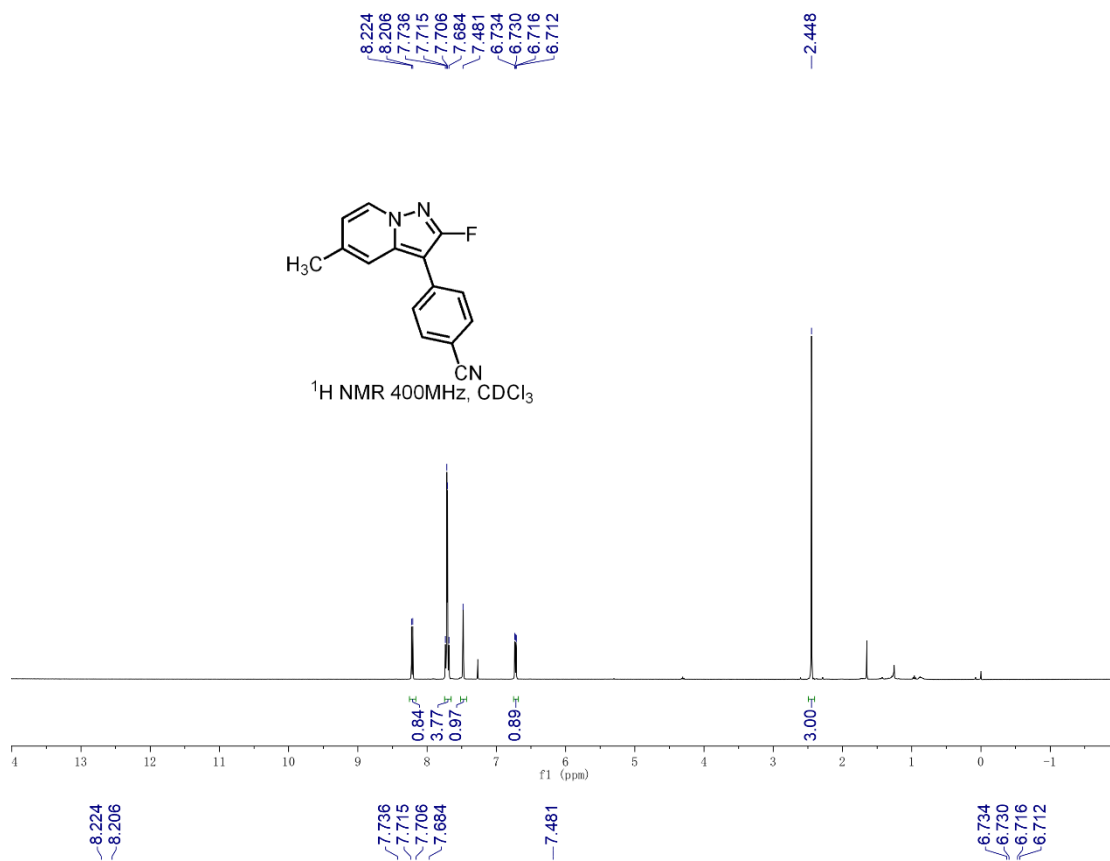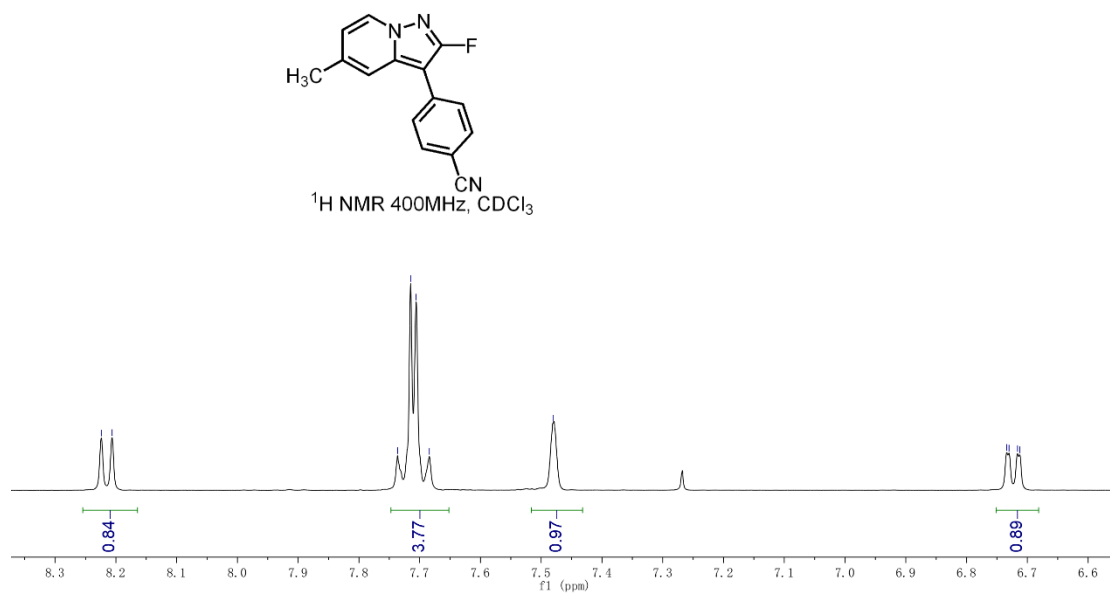

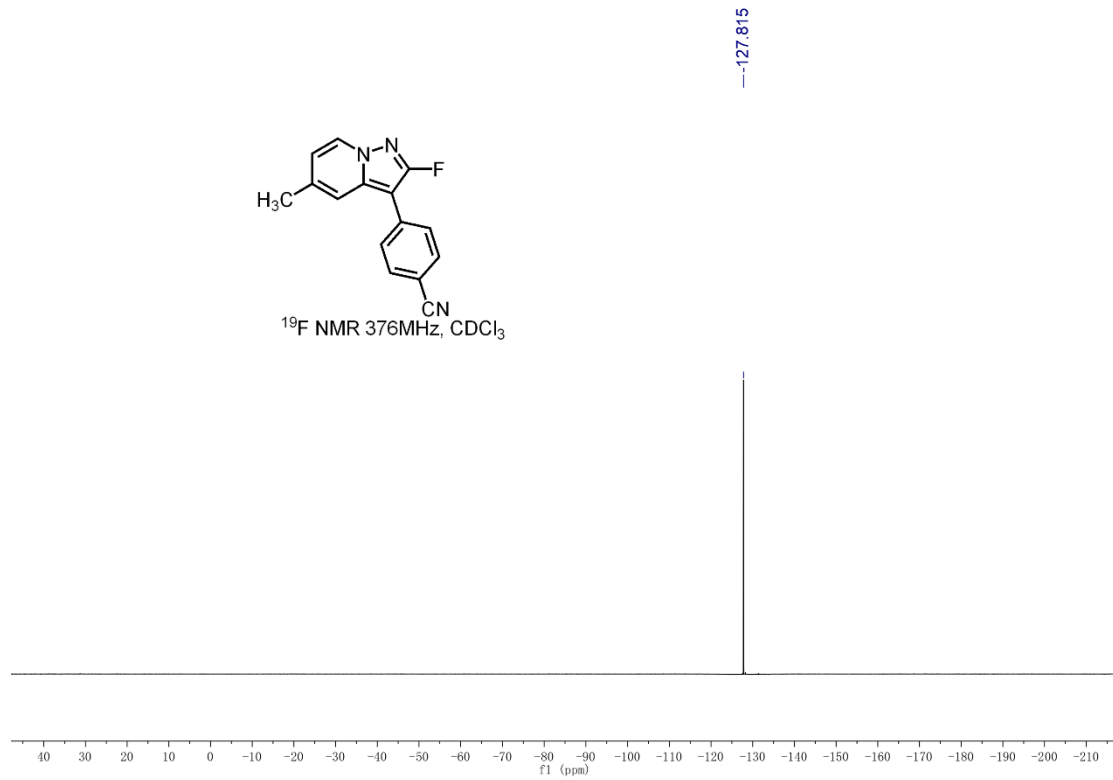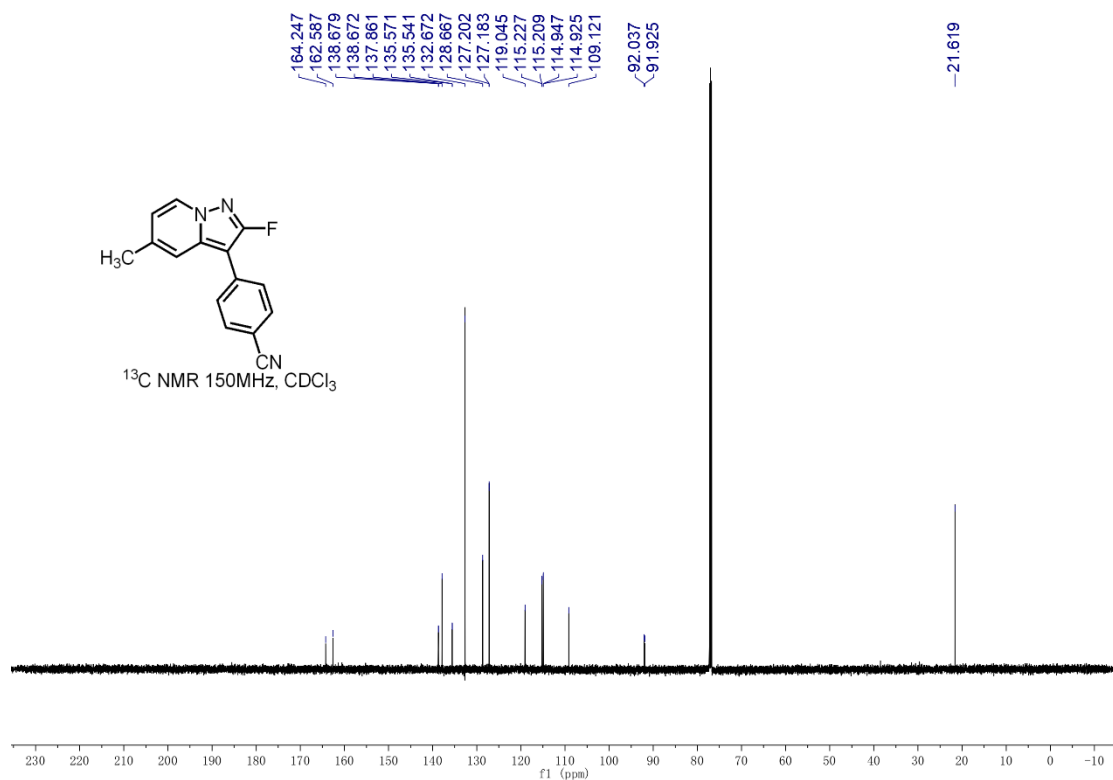

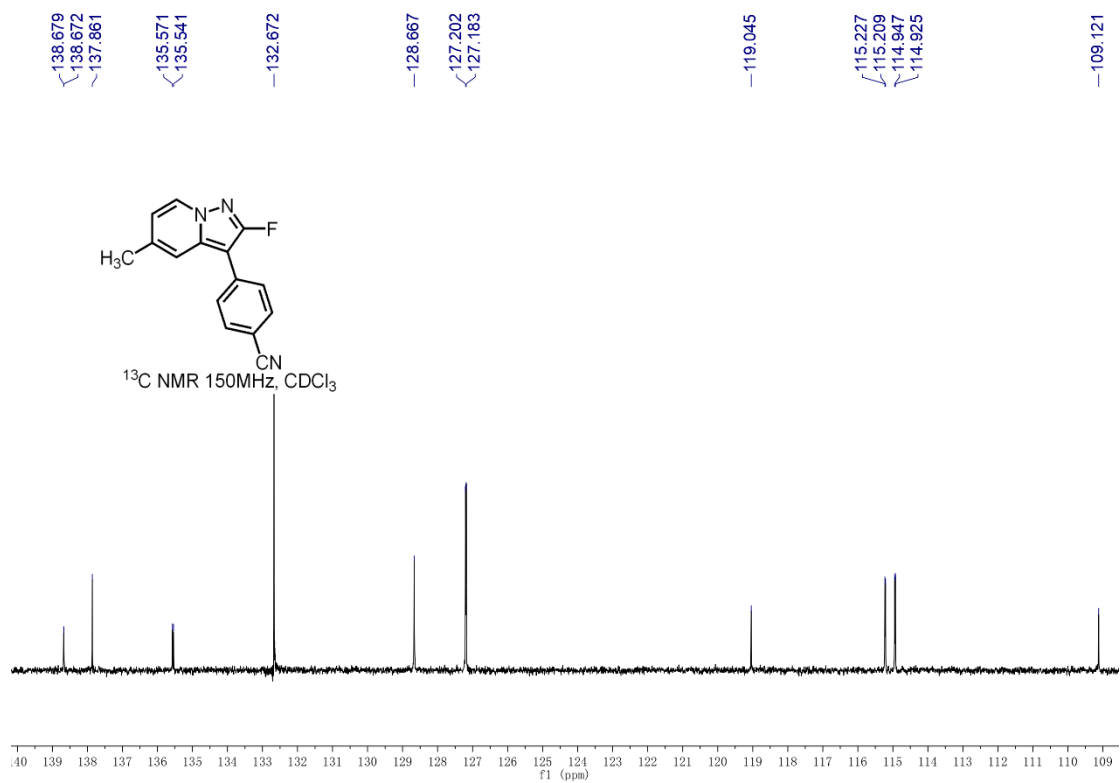

HRMS (ESI) copy of compound **3f**:

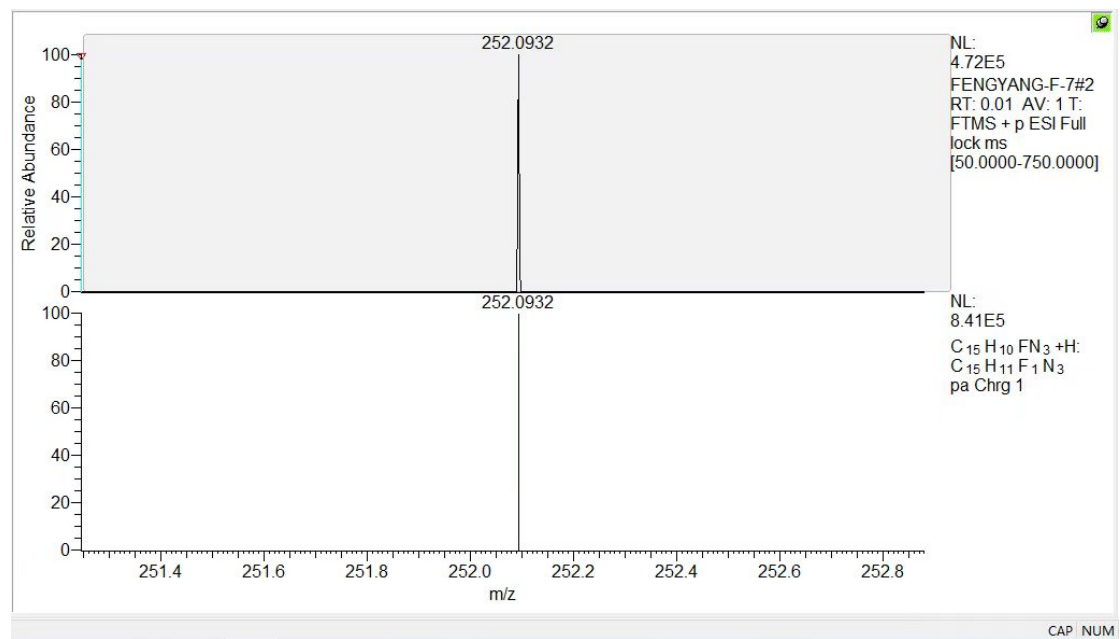

NMR copies of compound **3g**:

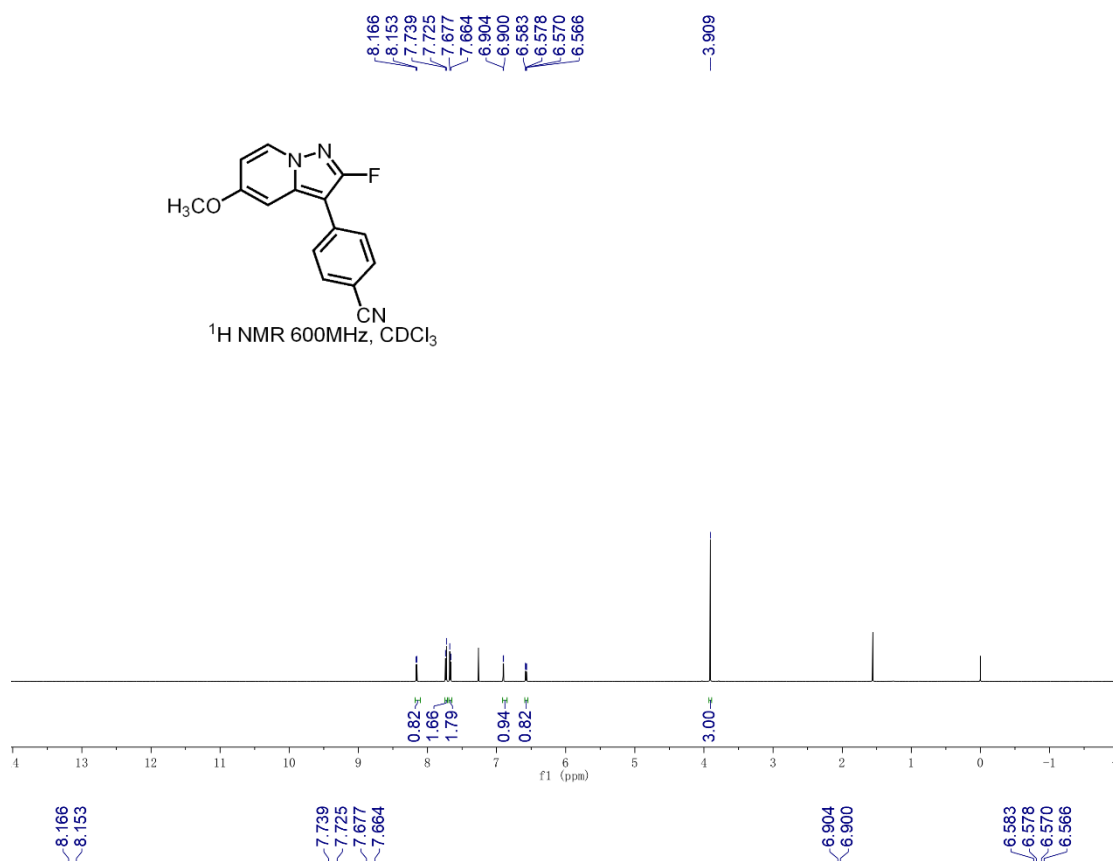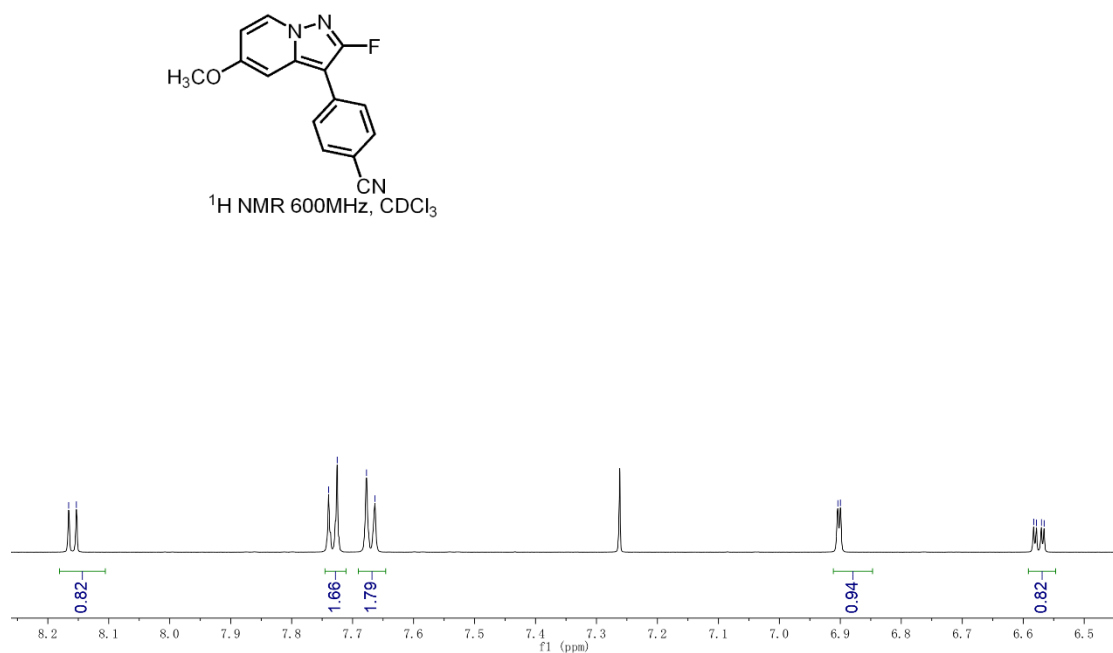

-127.213

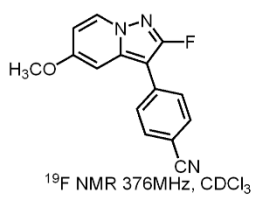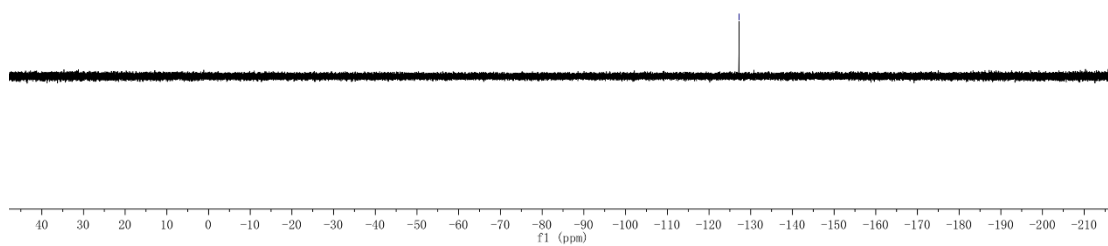

164.657  
162.998  
158.942  
139.744  
135.743  
135.713  
132.753  
130.449  
127.039  
127.021  
119.045  
109.030  
107.000  
106.983  
93.784  
93.766  
92.406  
92.280

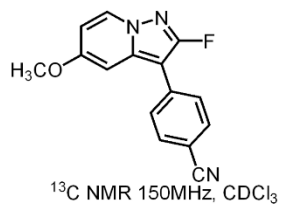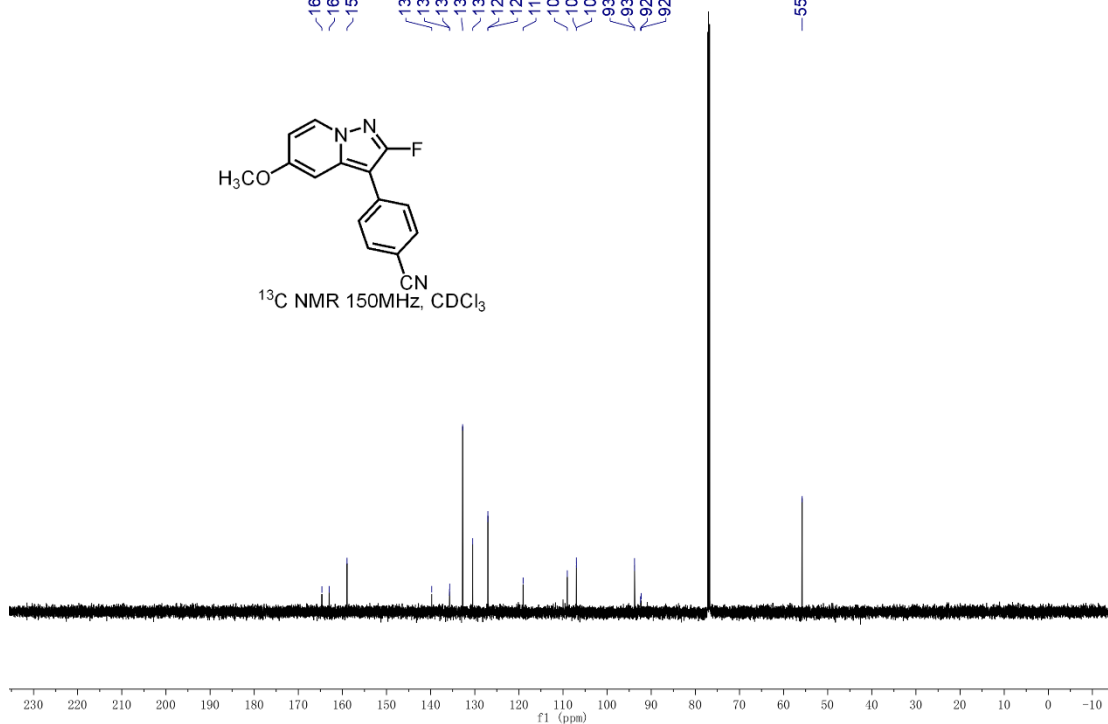

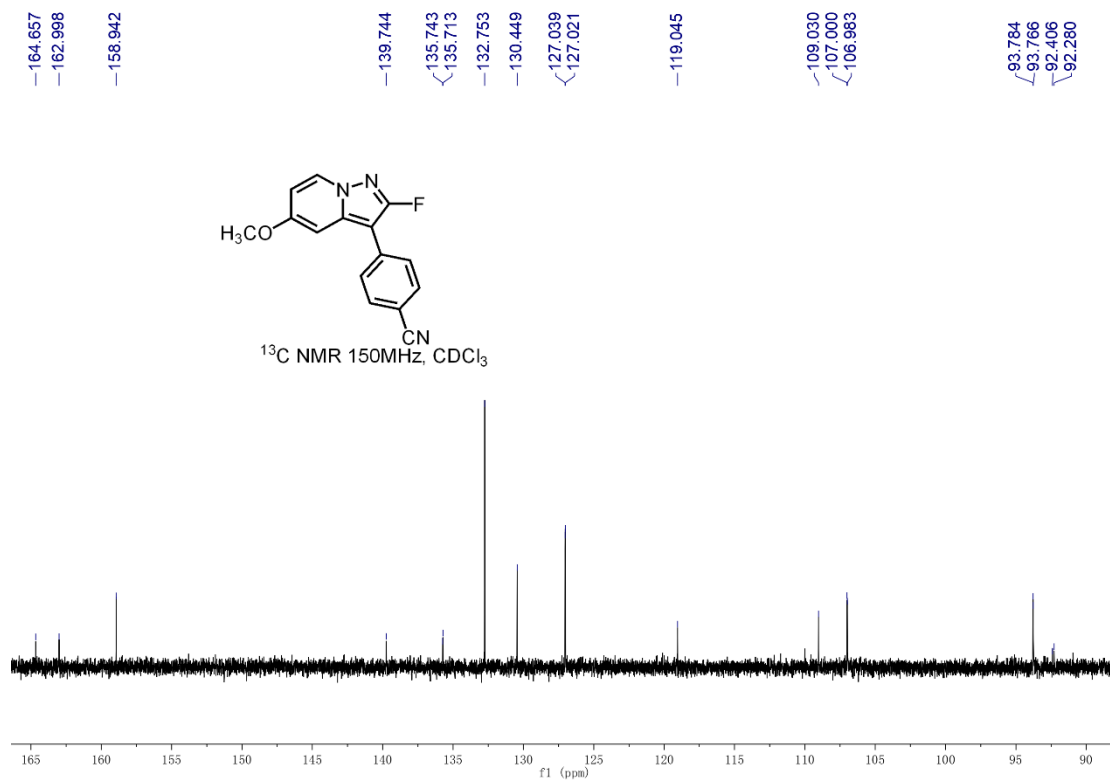

HRMS (ESI) copy of compound **3g**:

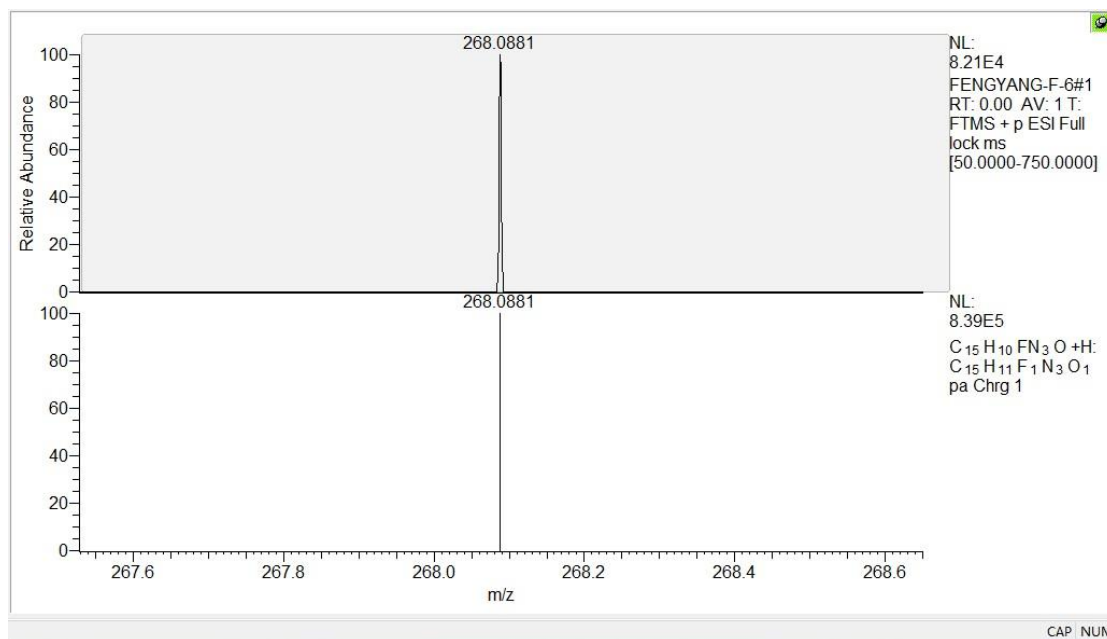

NMR copies of compound **3h**:

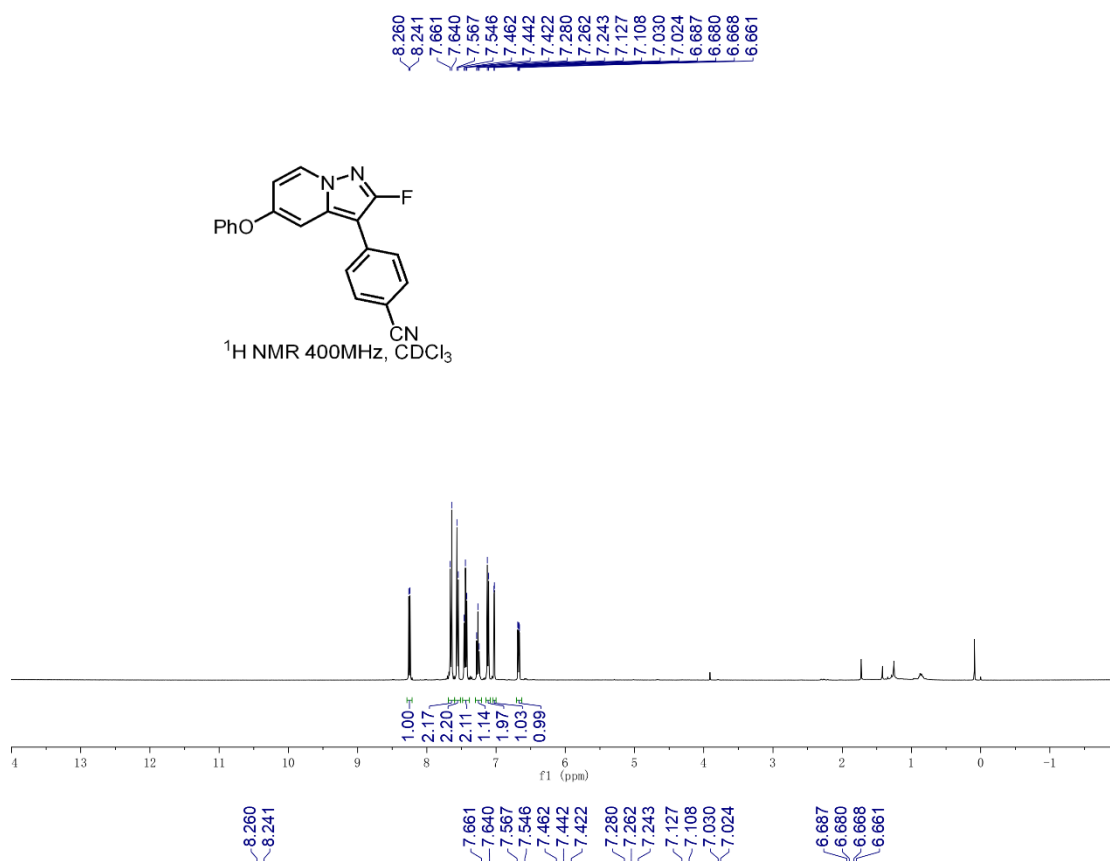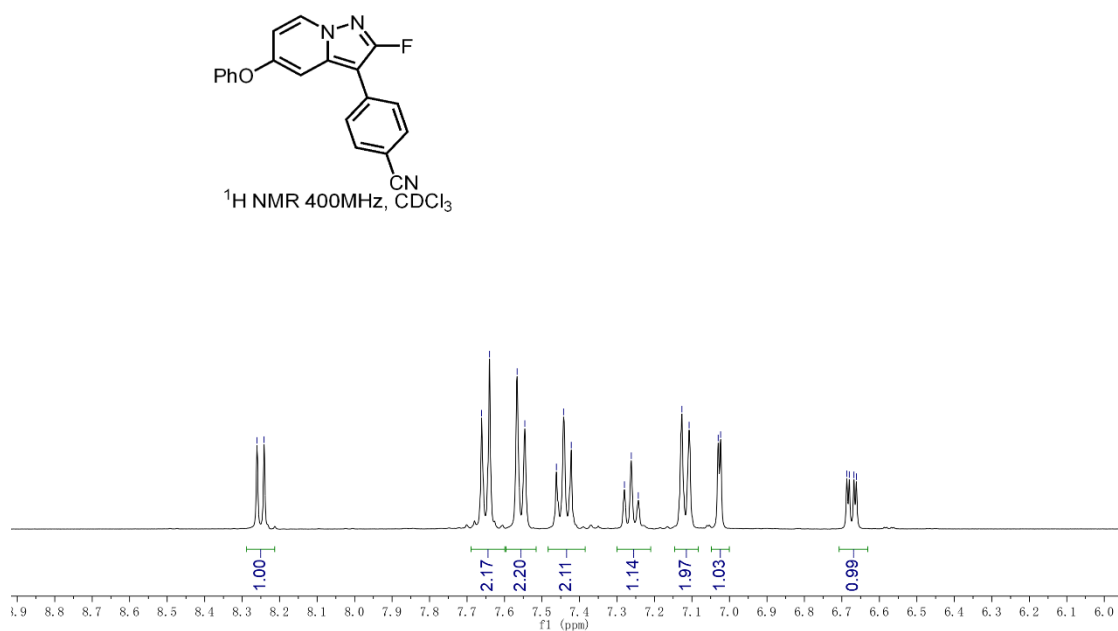

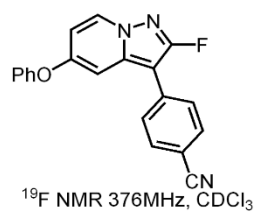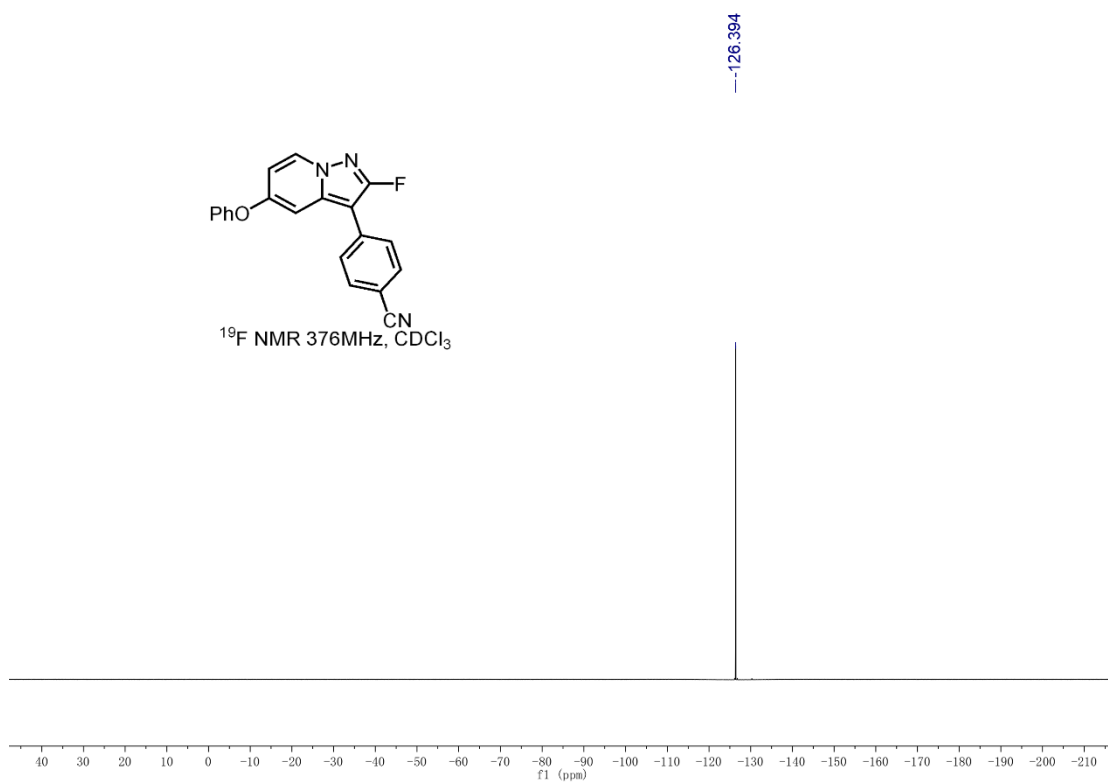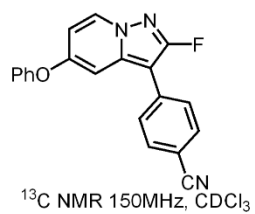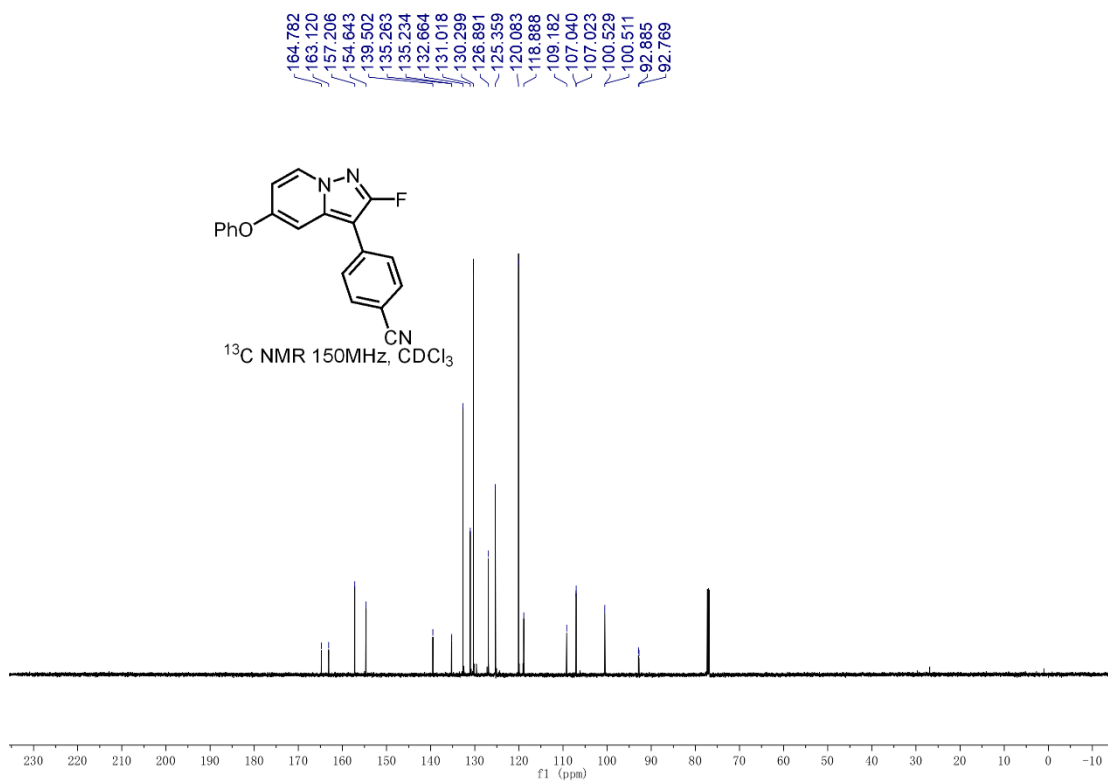



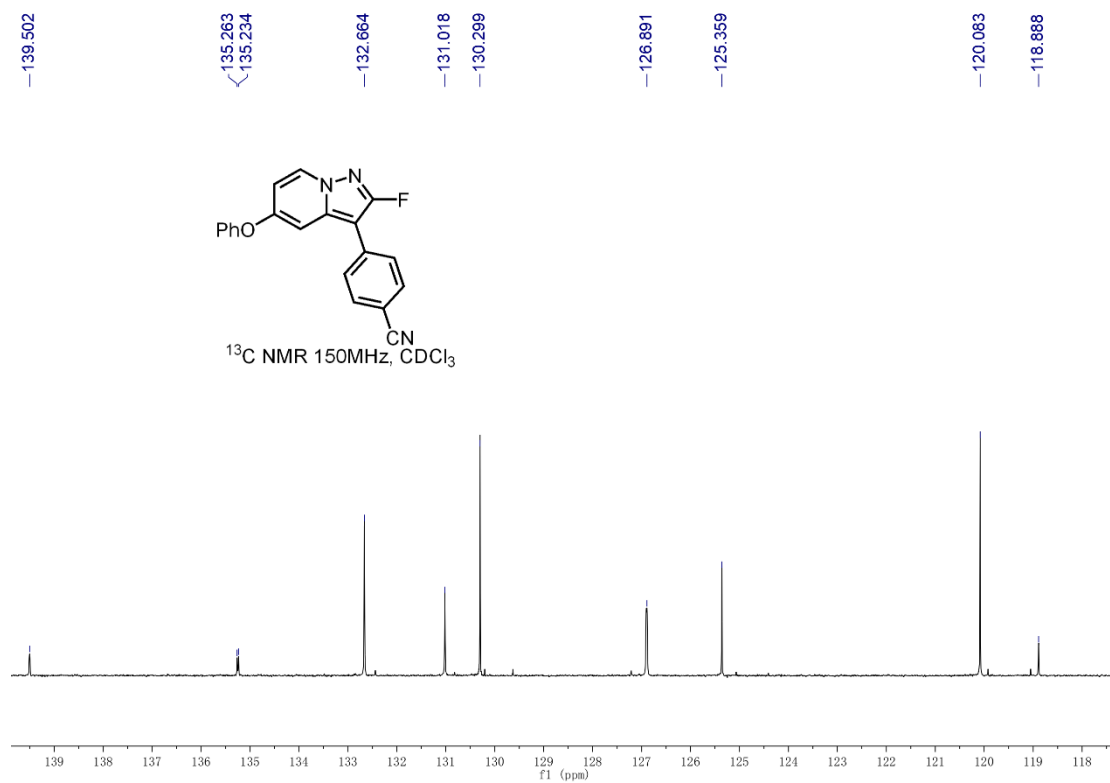

HRMS (ESI) copy of compound **3h**:

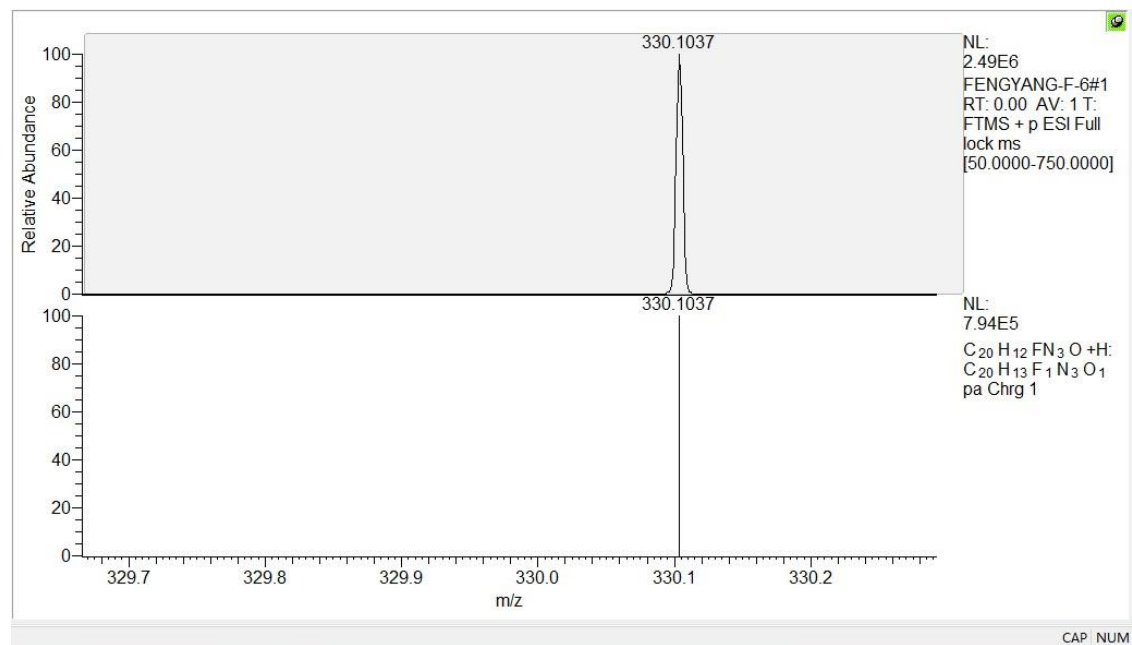

NMR copies of compound **3i**:

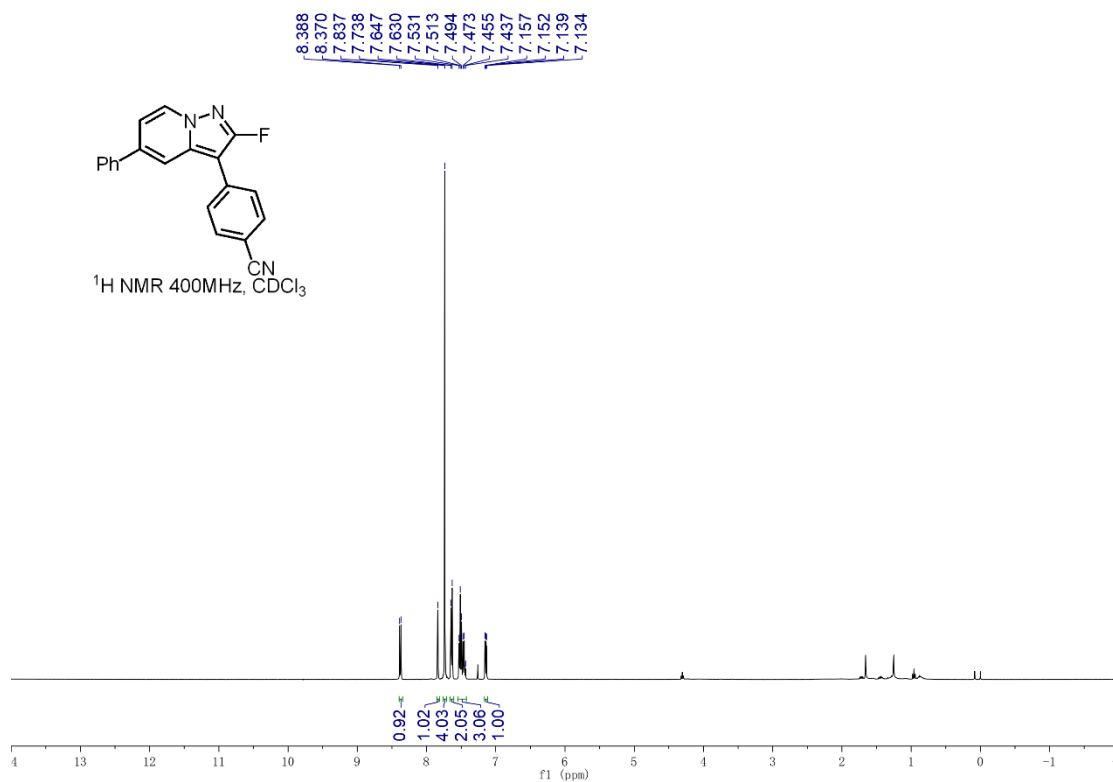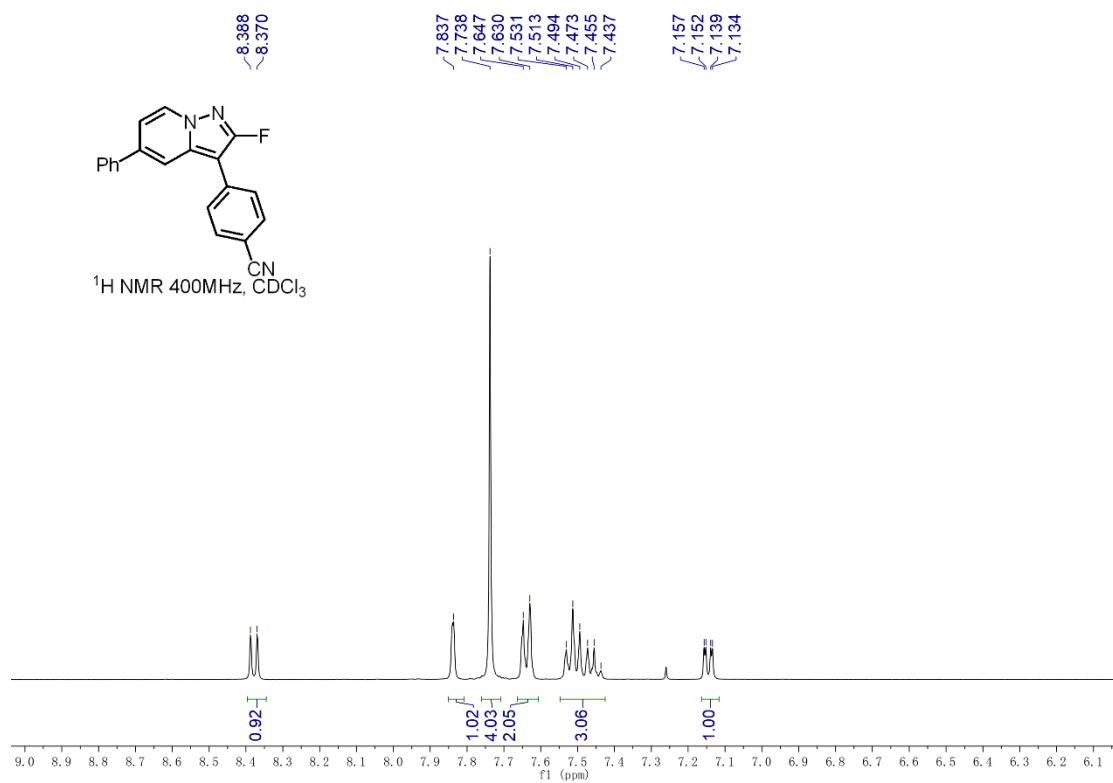

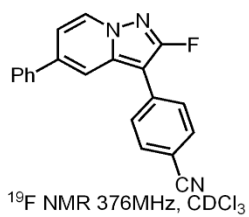

---127.144

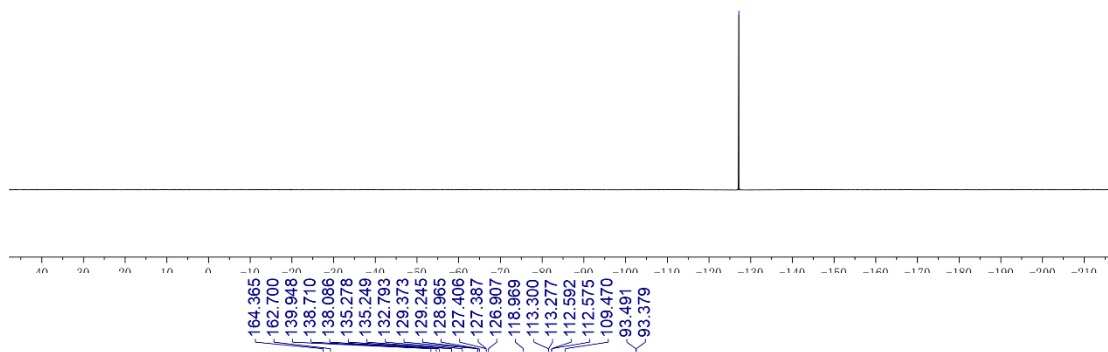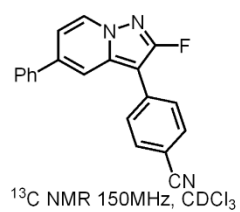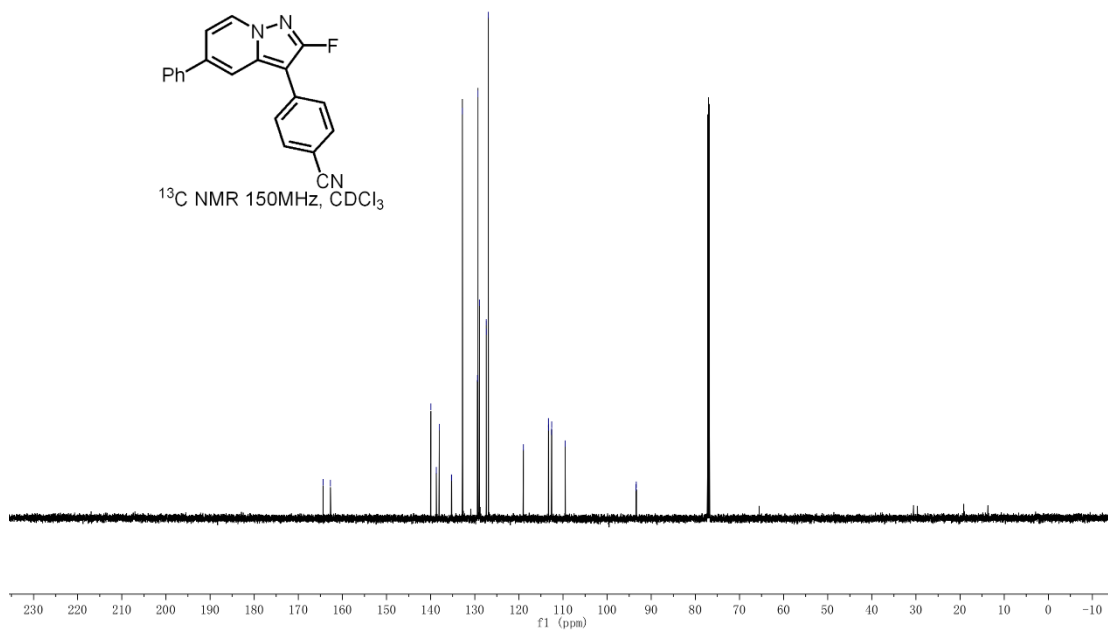

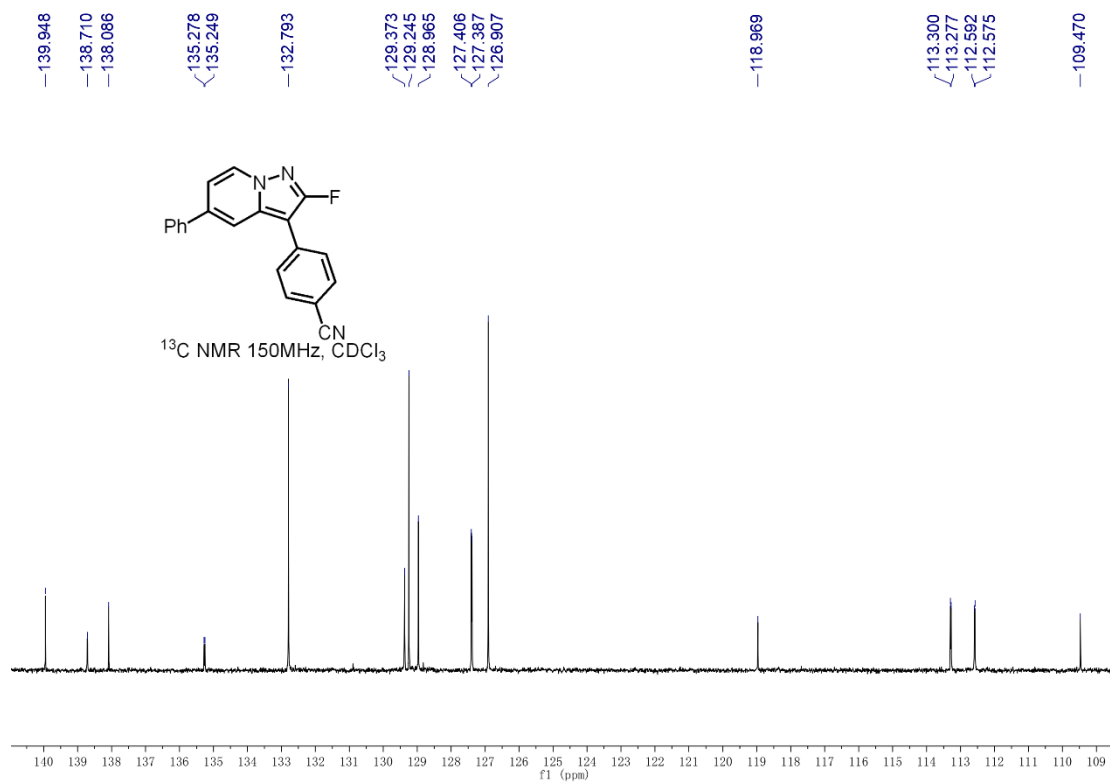

HRMS (ESI) copy of compound **3i**:

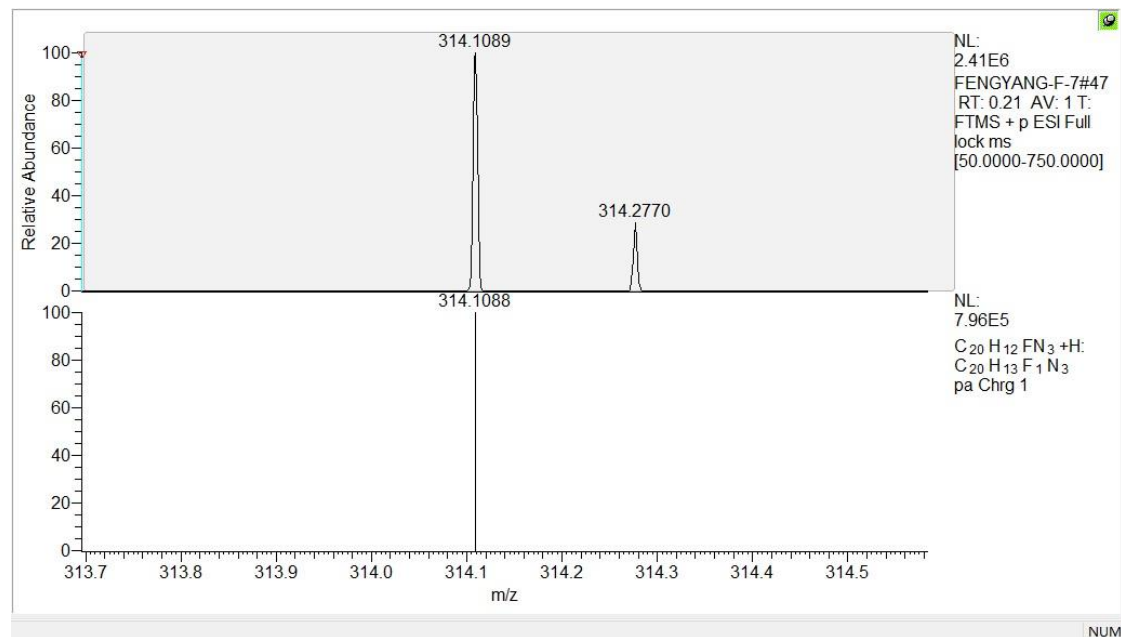

NMR copies of compound **3j**:

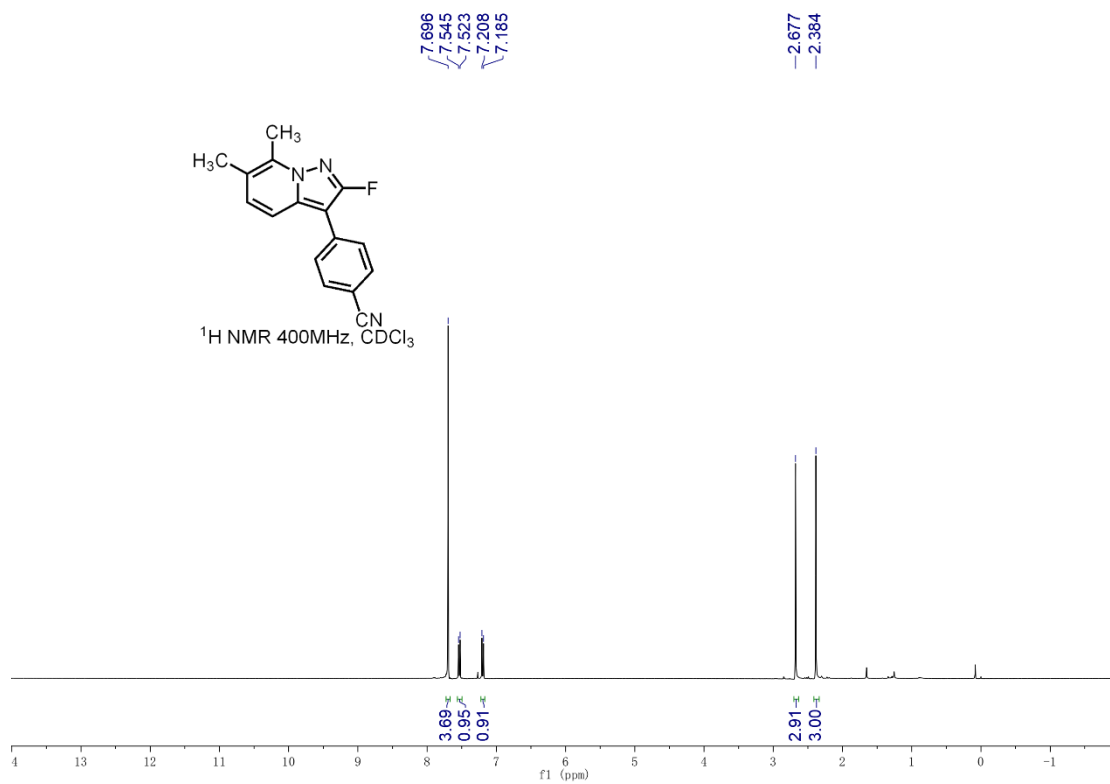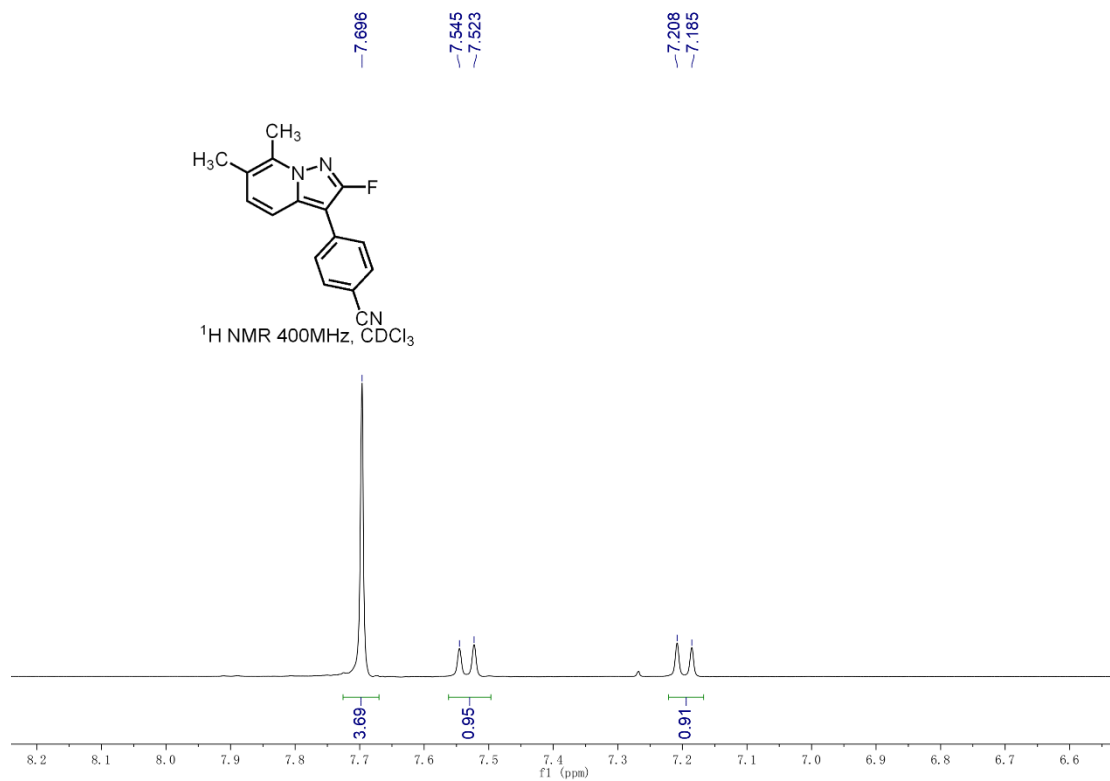

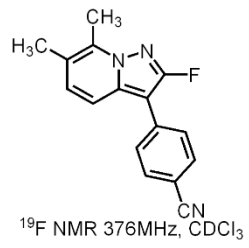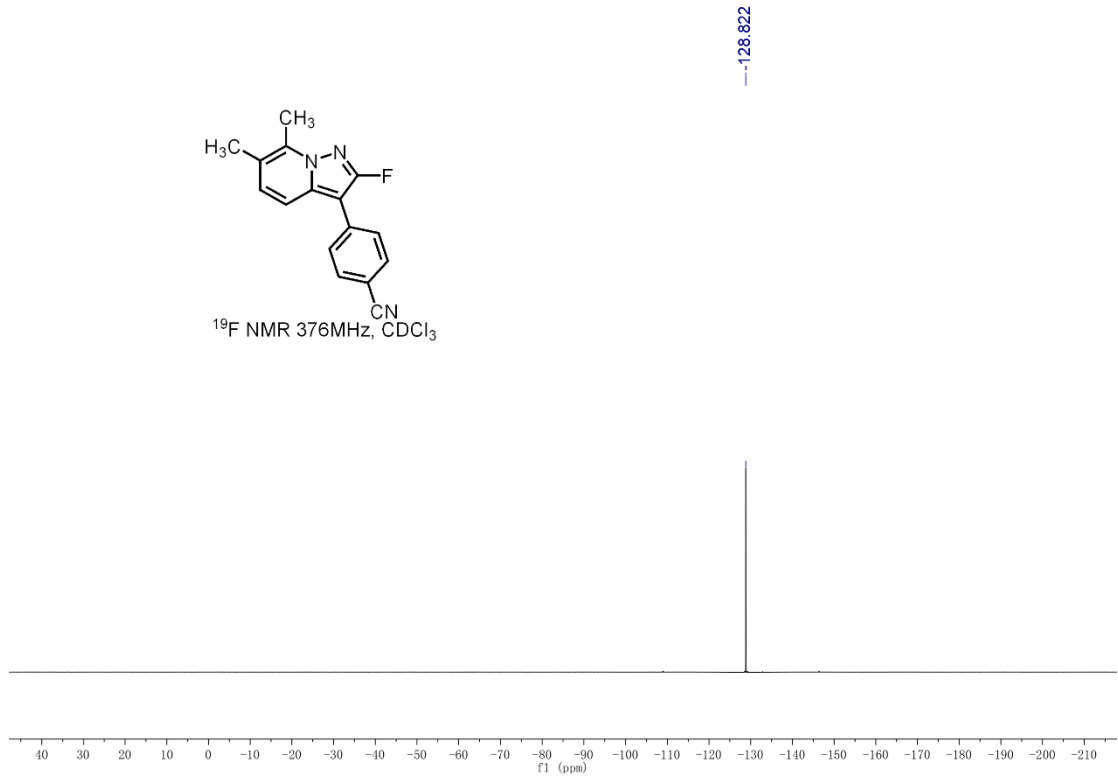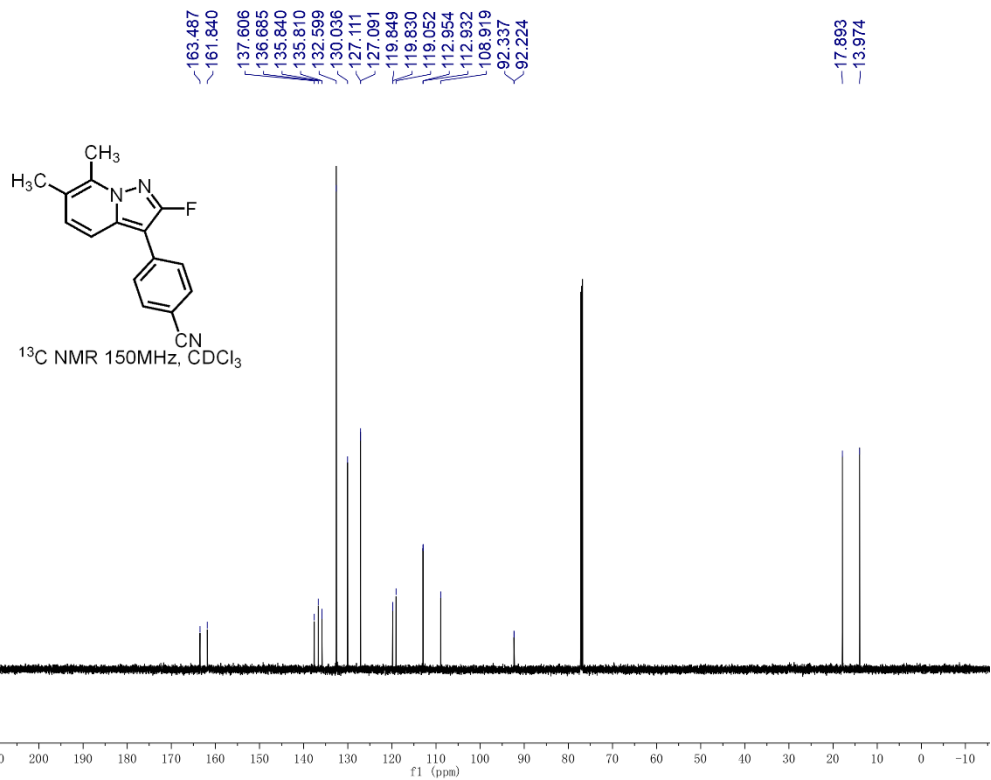

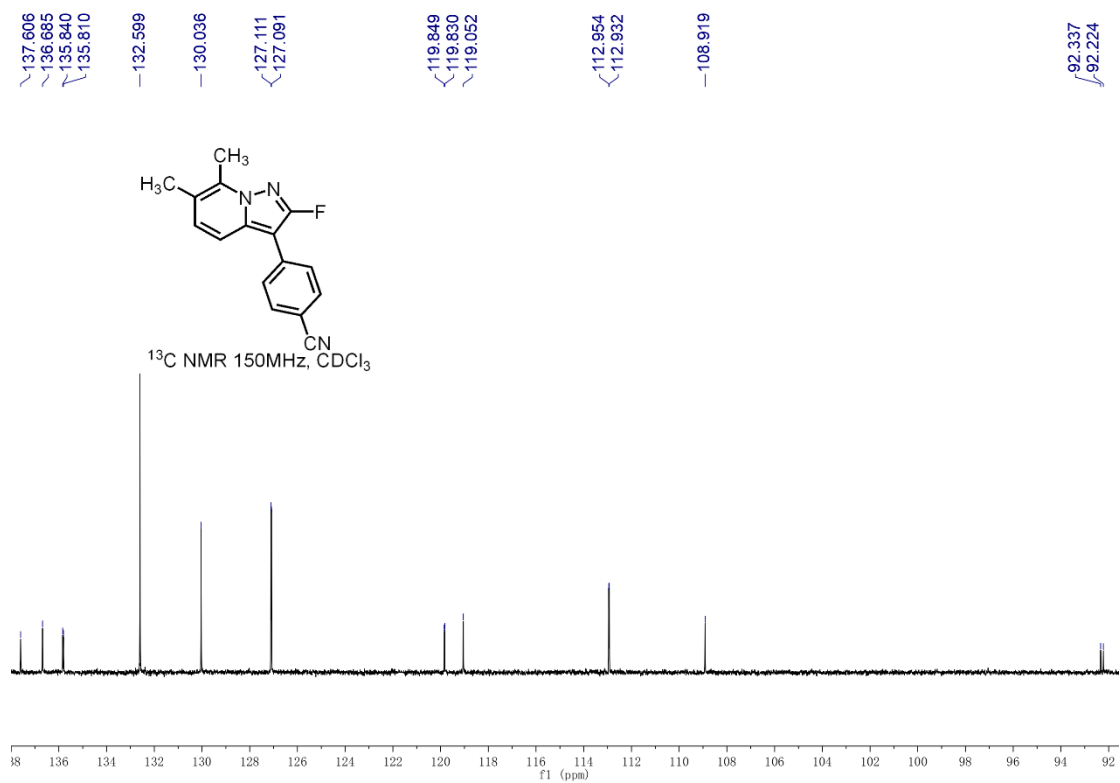

HRMS (ESI) copy of compound **3j**:

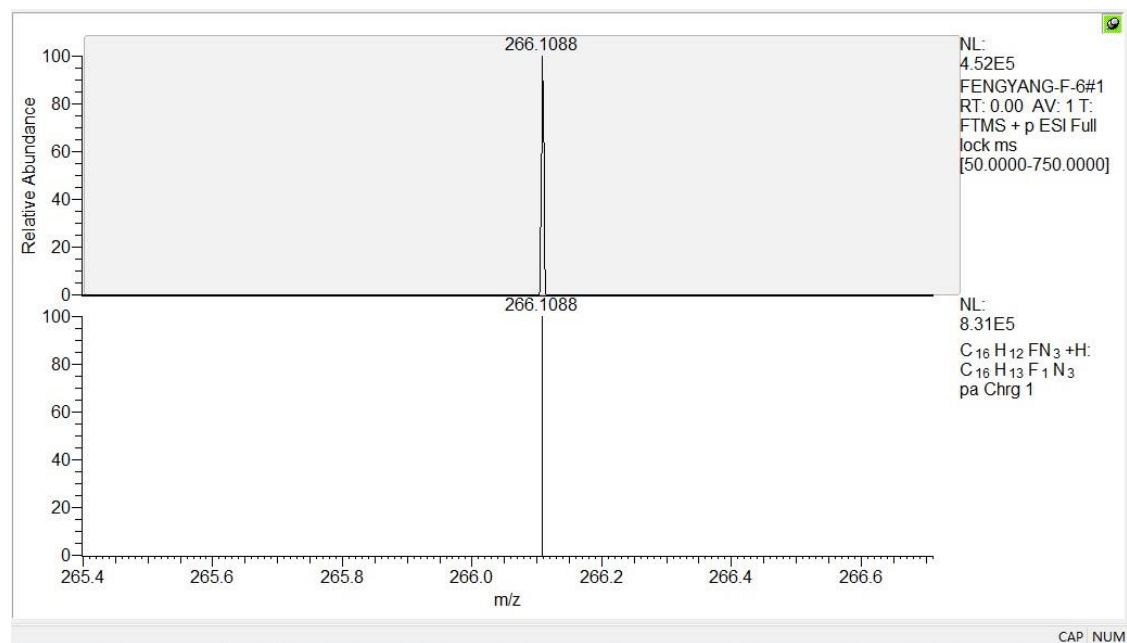

NMR copies of compound **3n**:

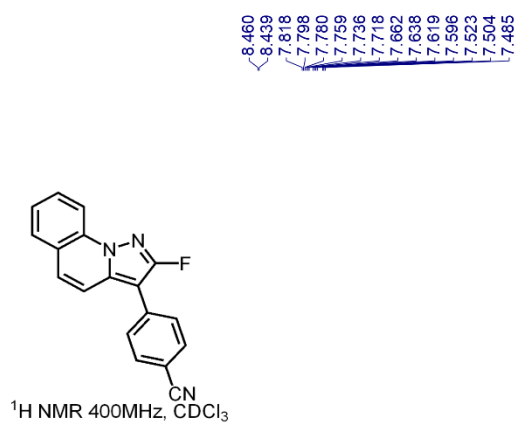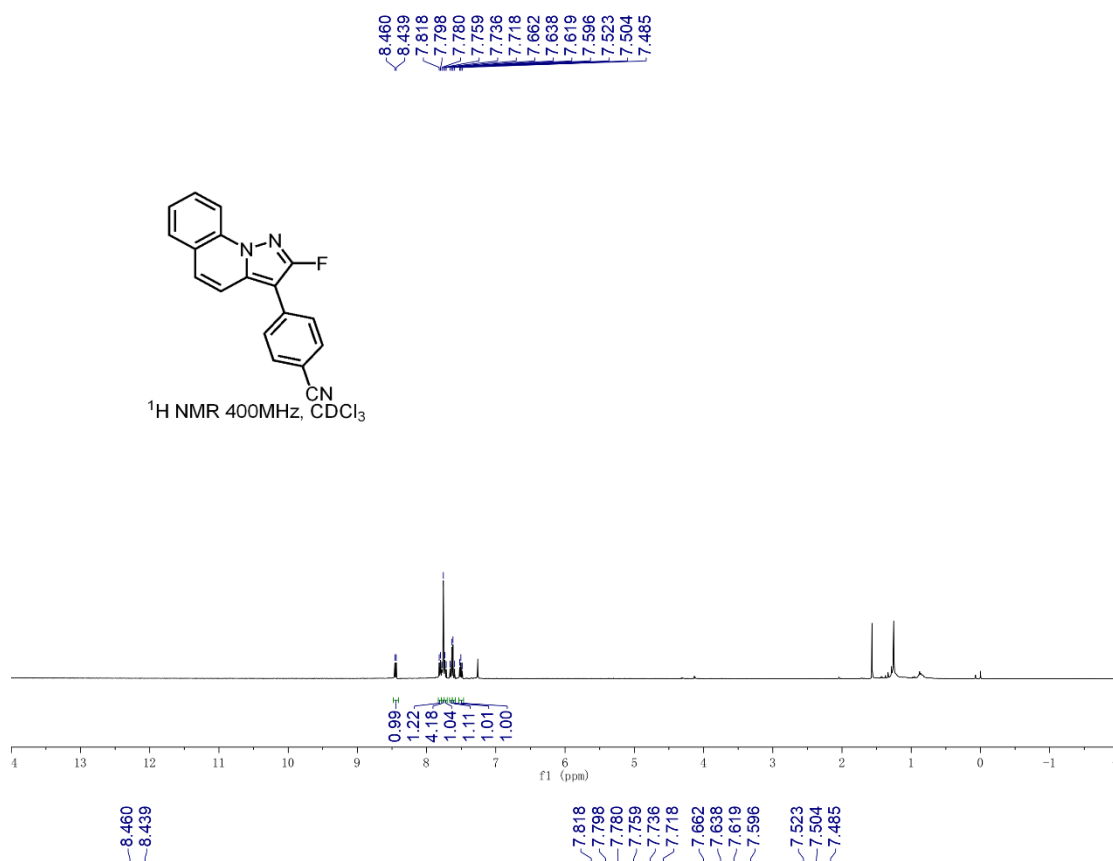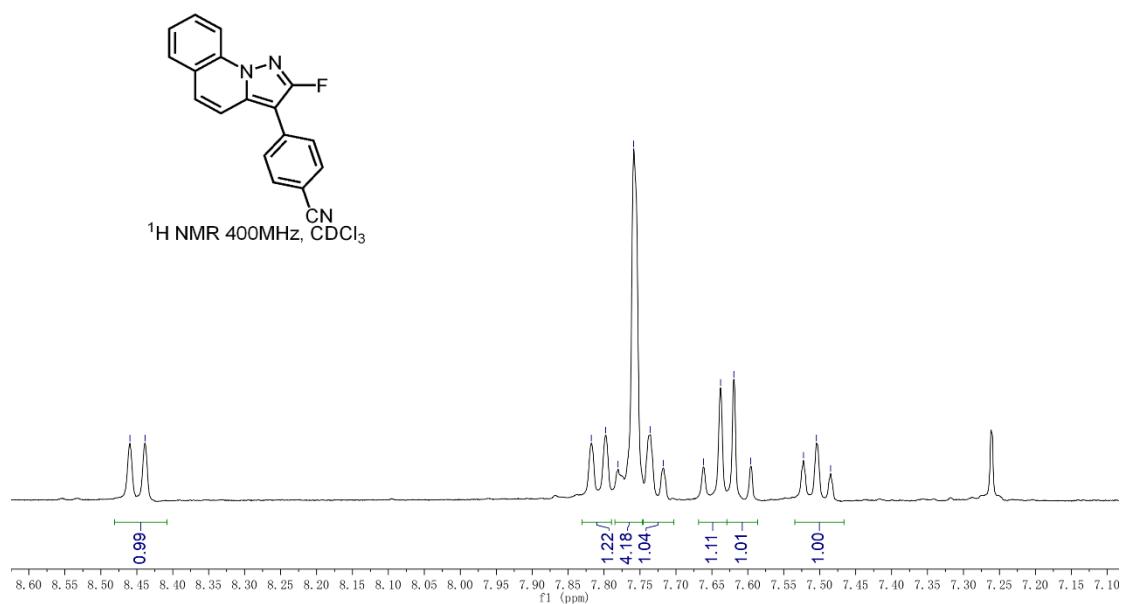



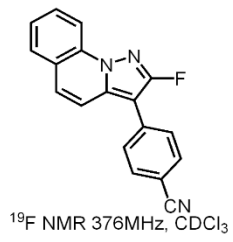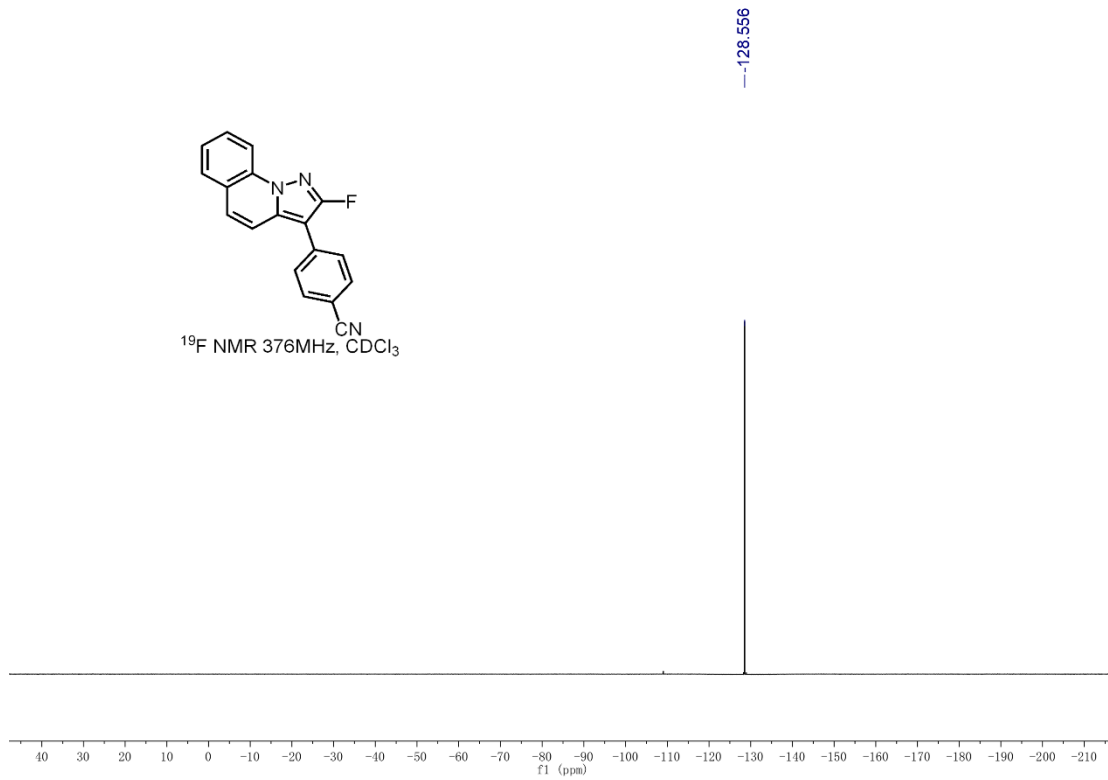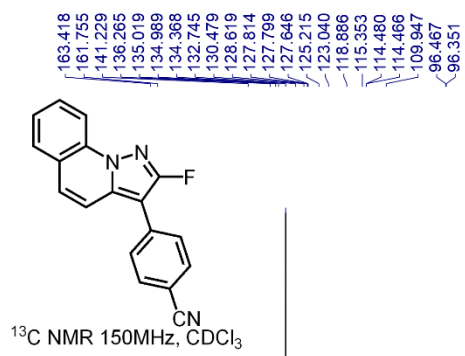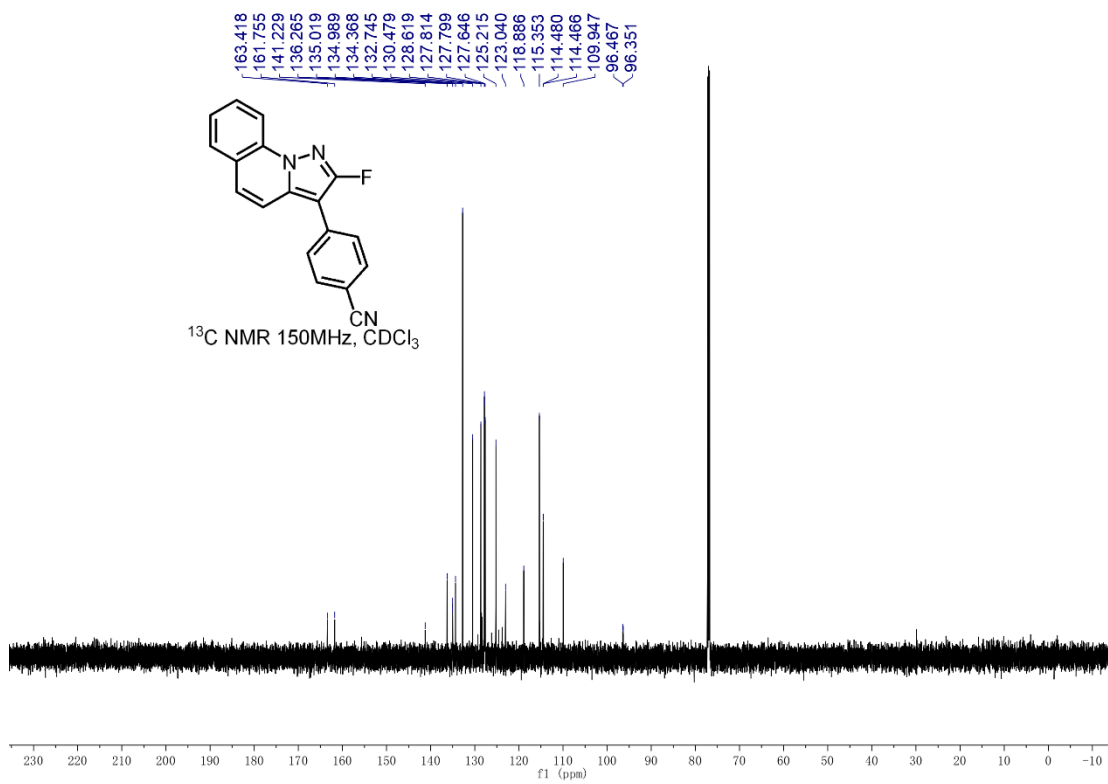

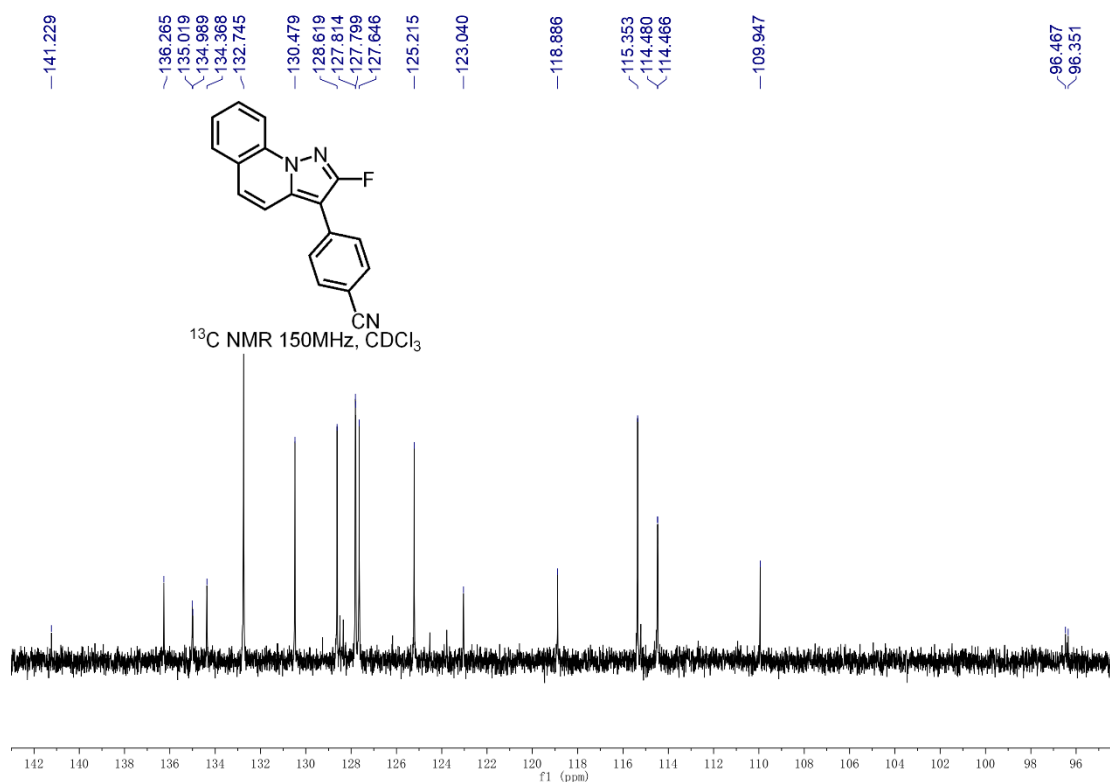

HRMS (ESI) copy of compound **3n**:

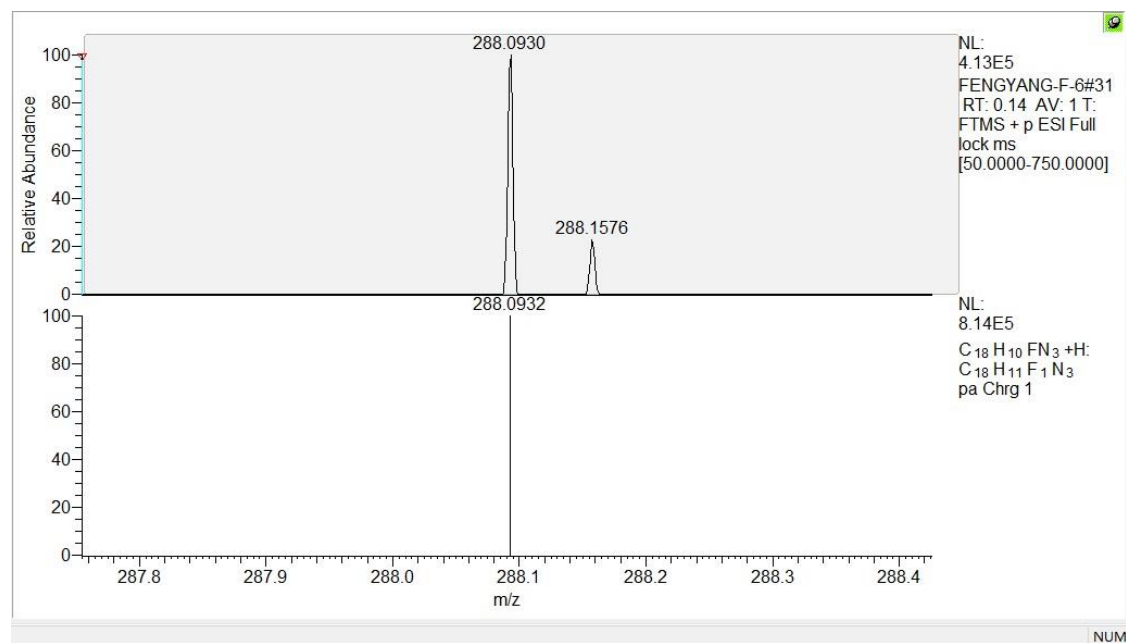

NMR copies of compound **3o**:

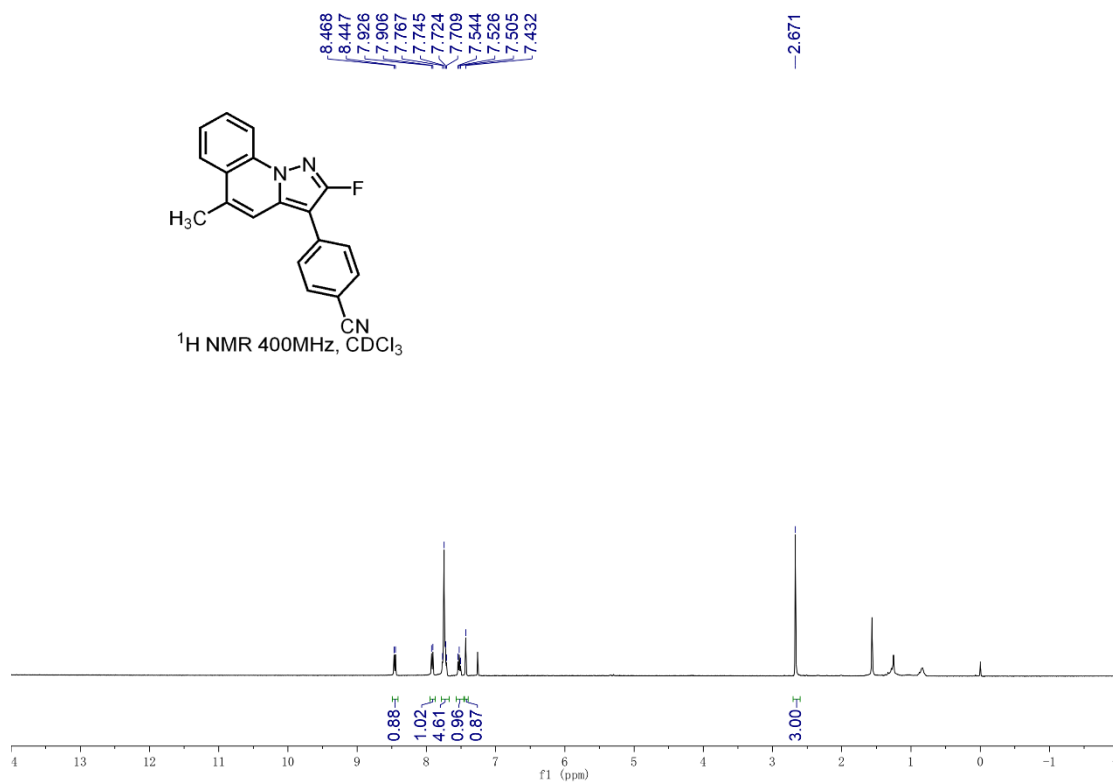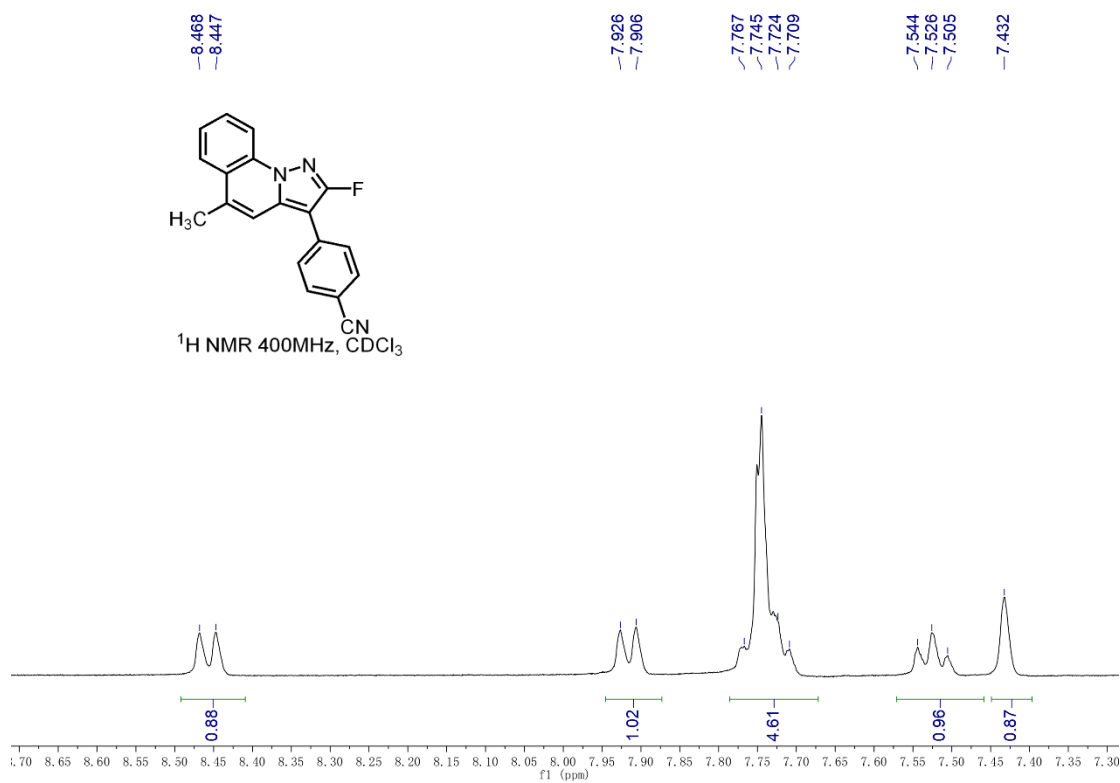

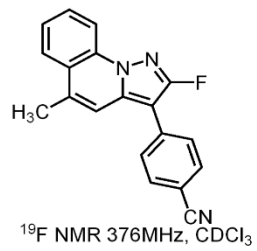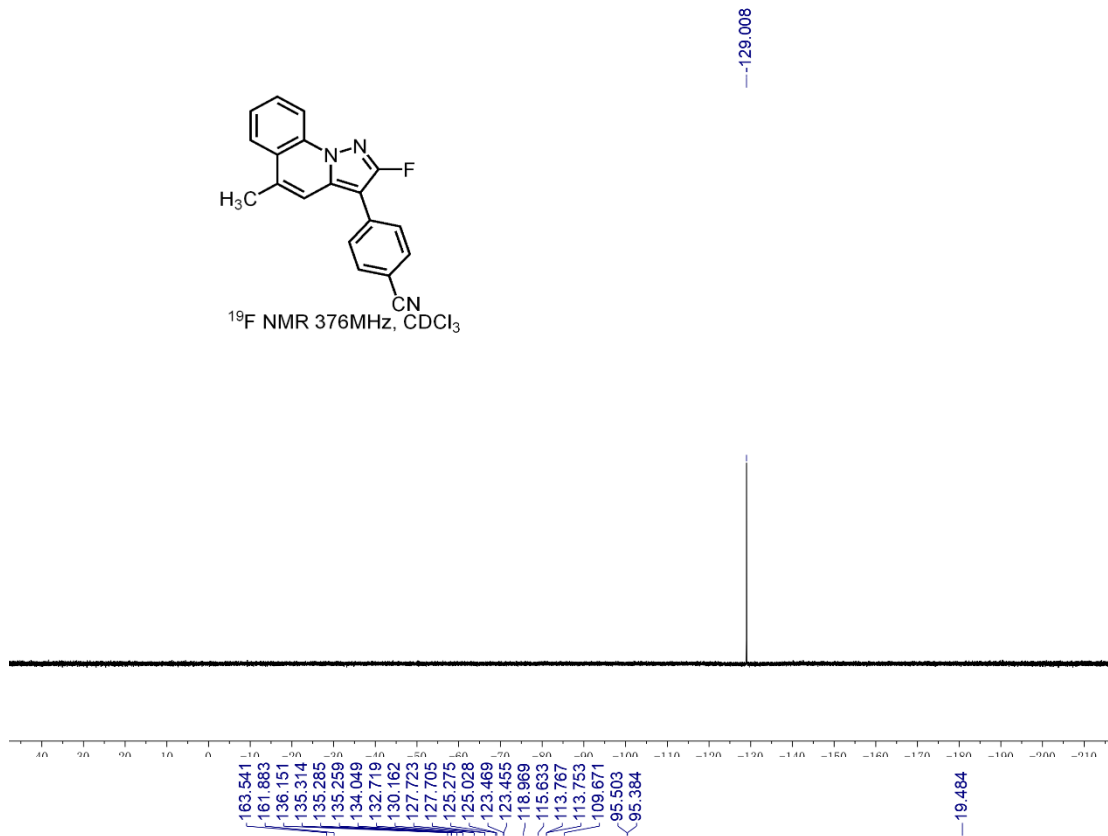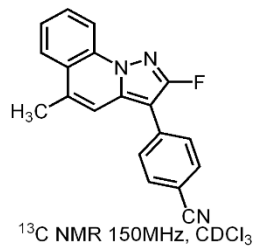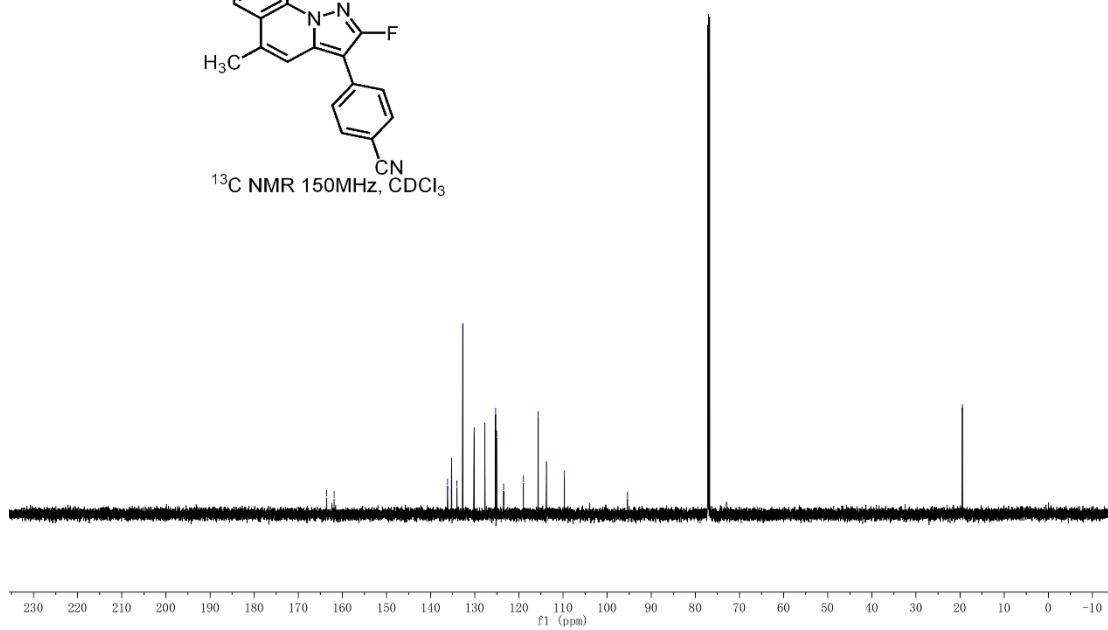

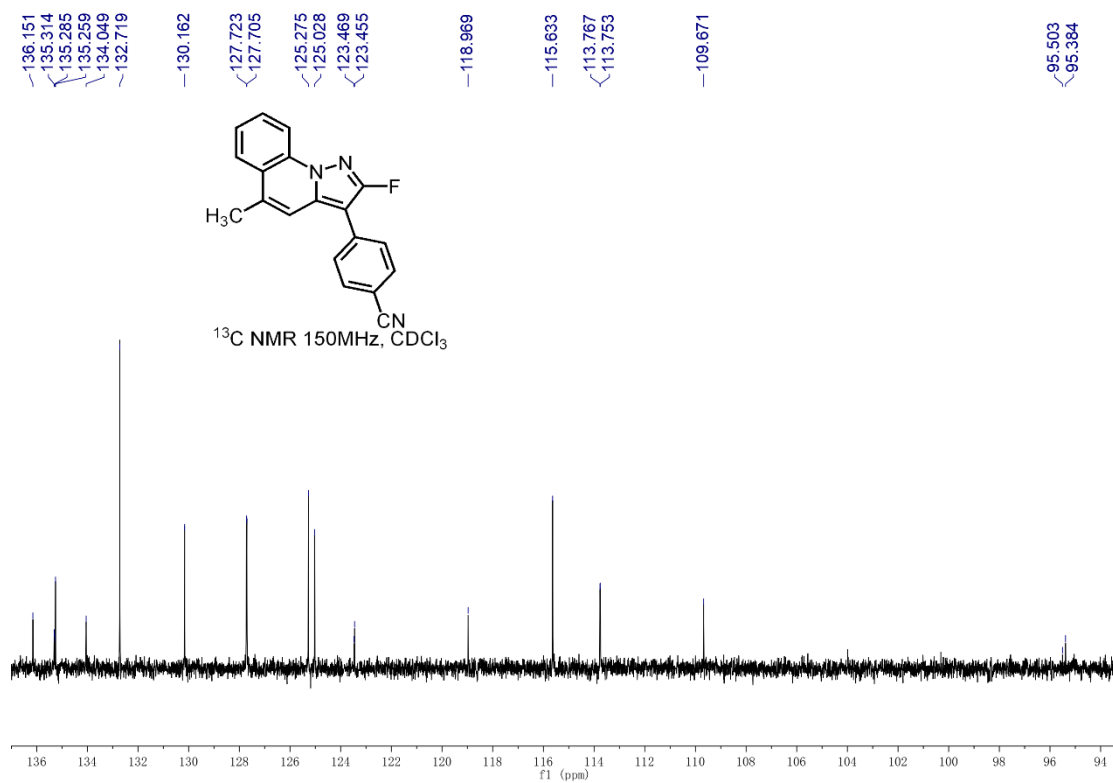

### HRMS (ESI) copy of compound **3o**:

E:\FENGYANG-F-6

09/26/23 15:17:04

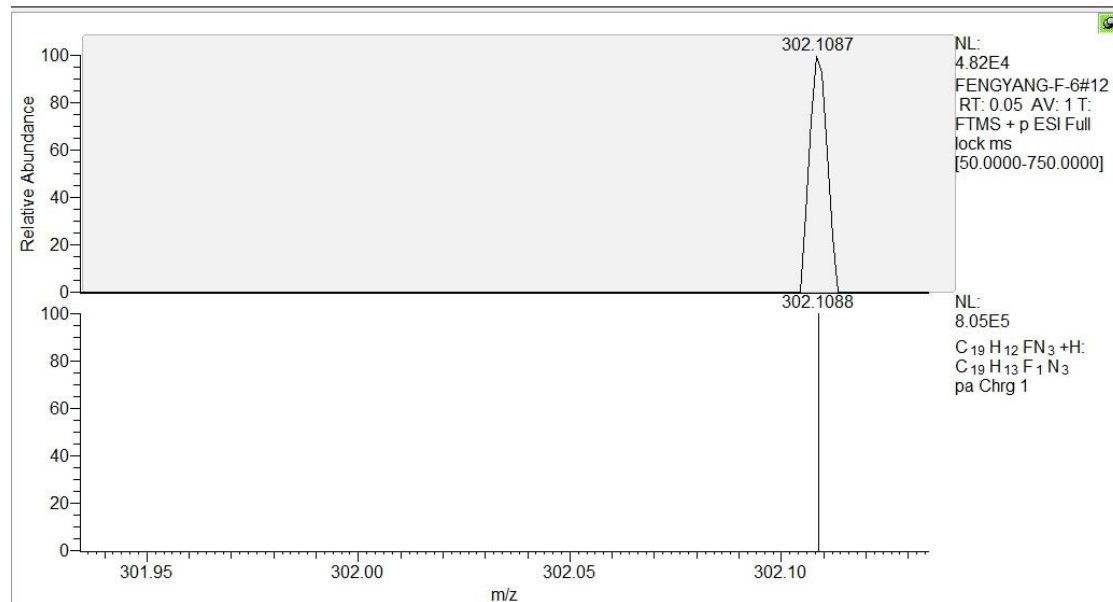

NMR copies of compound **3p**:

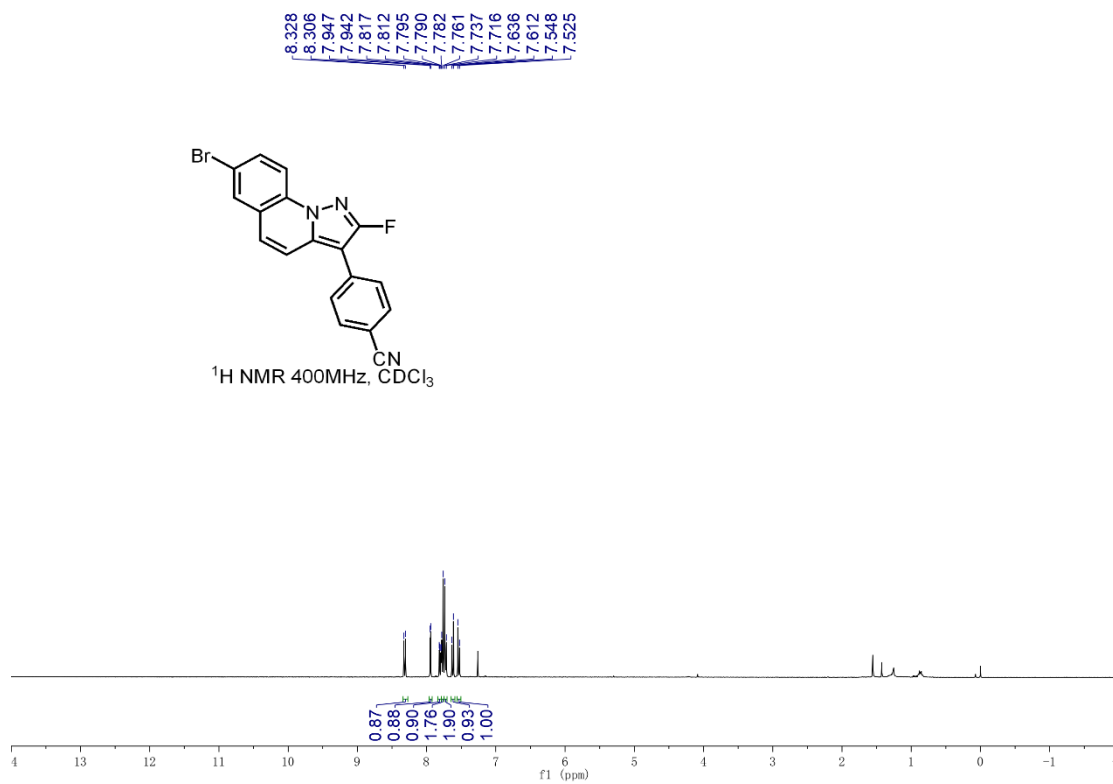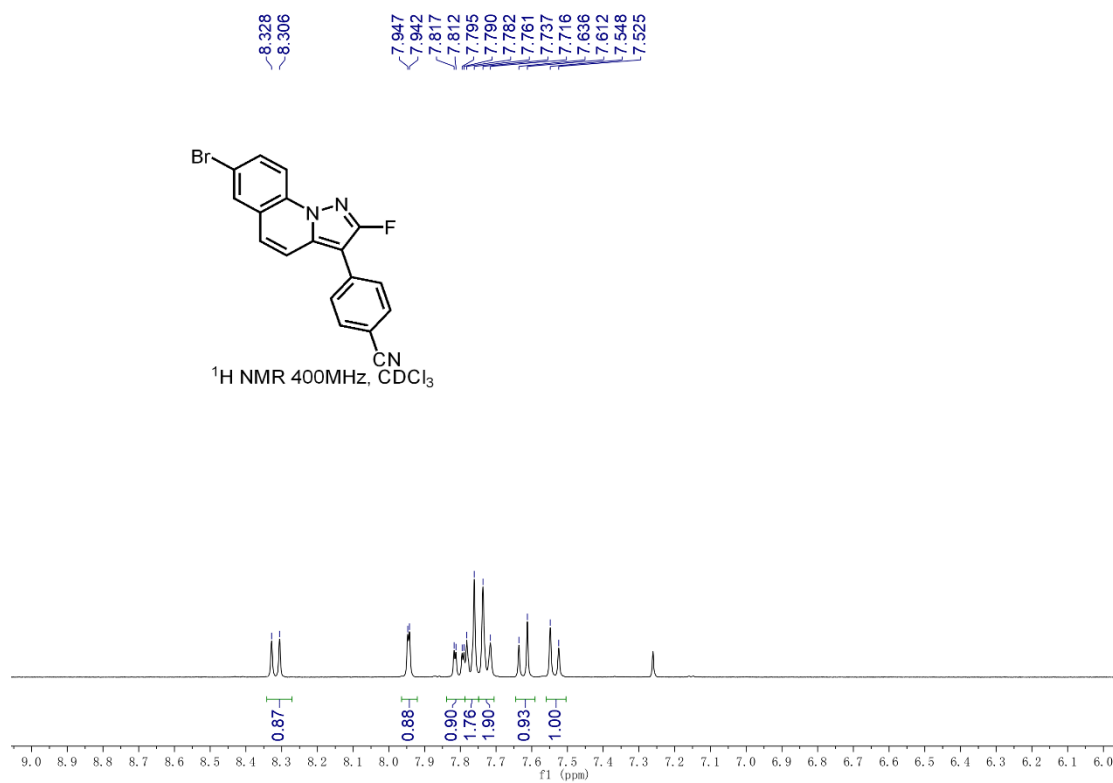

-127.993

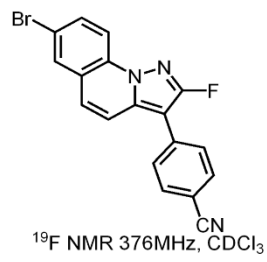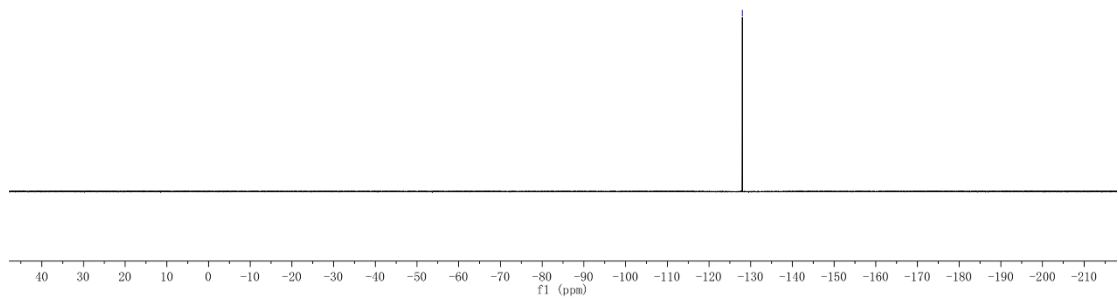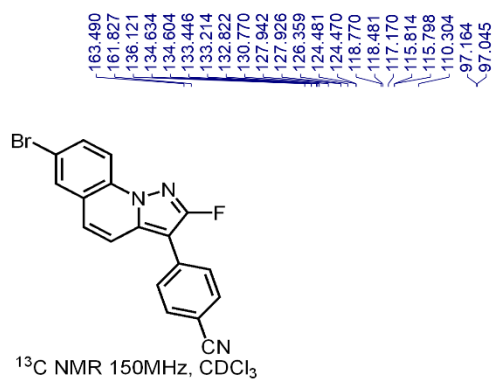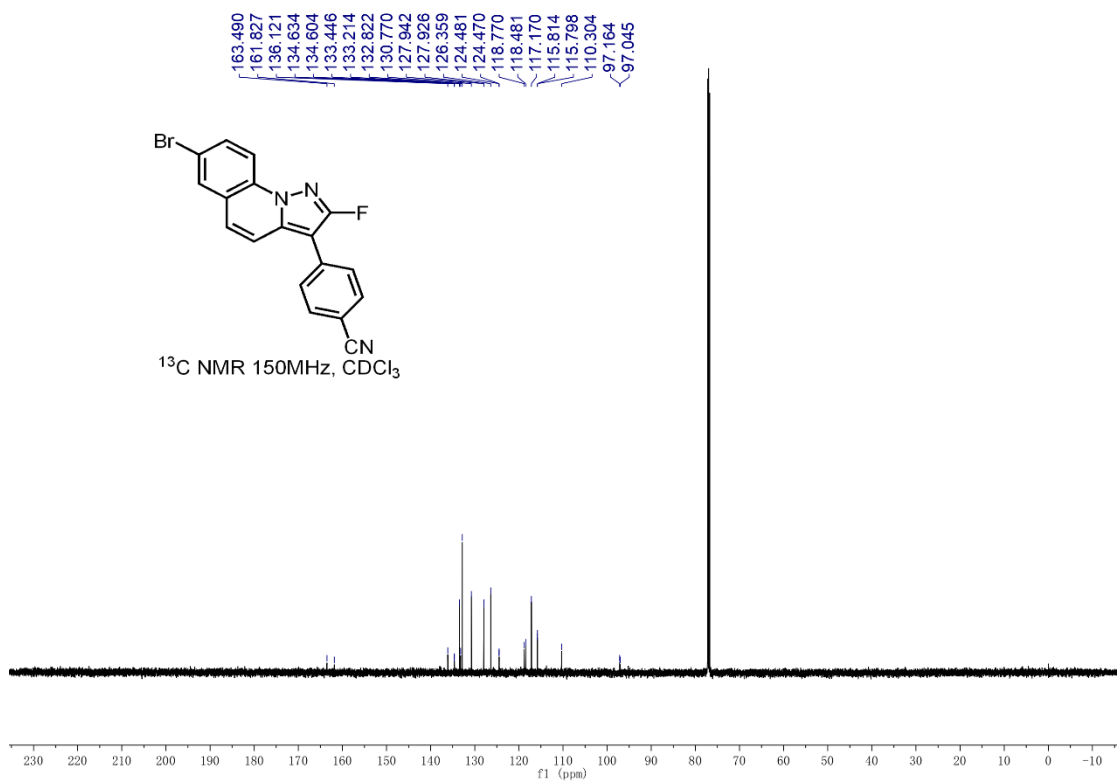

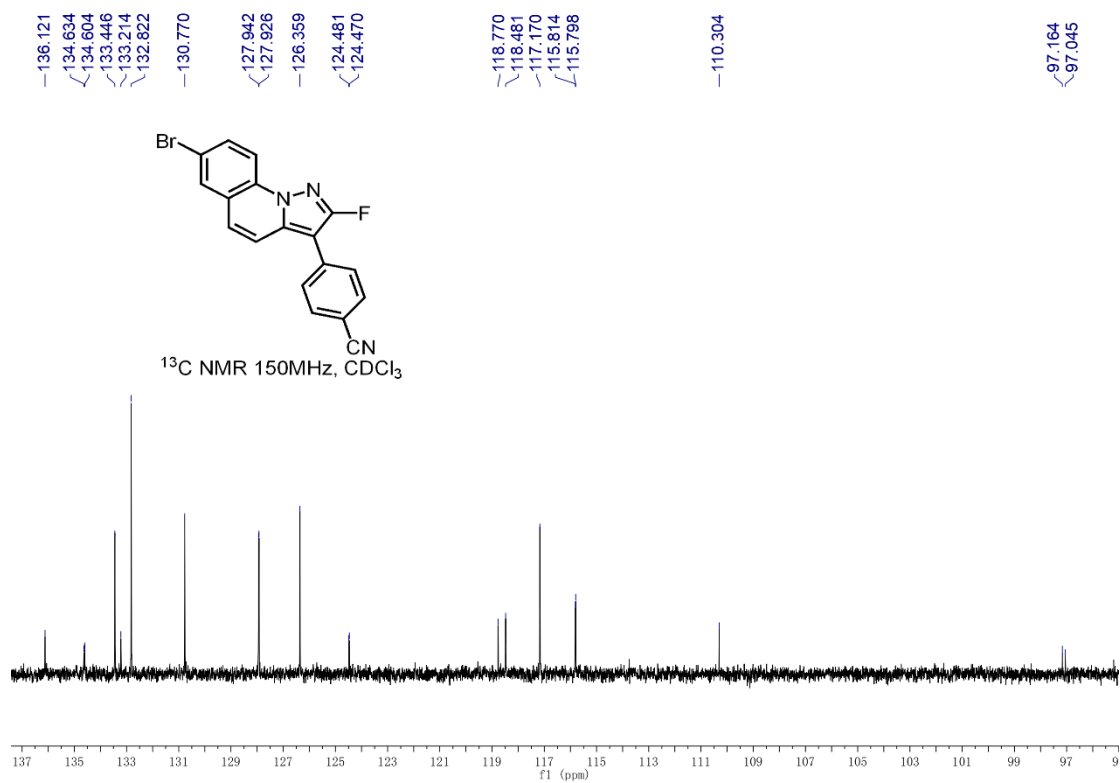

HRMS (ESI) copy of compound **3p**:

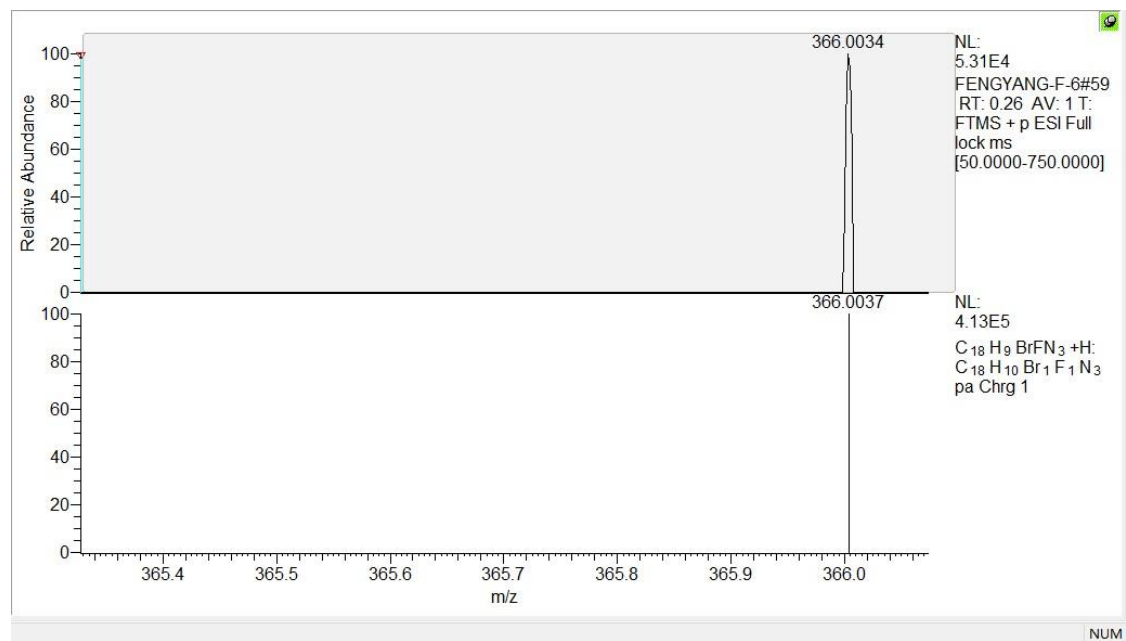



NMR copies of compound **3q**:

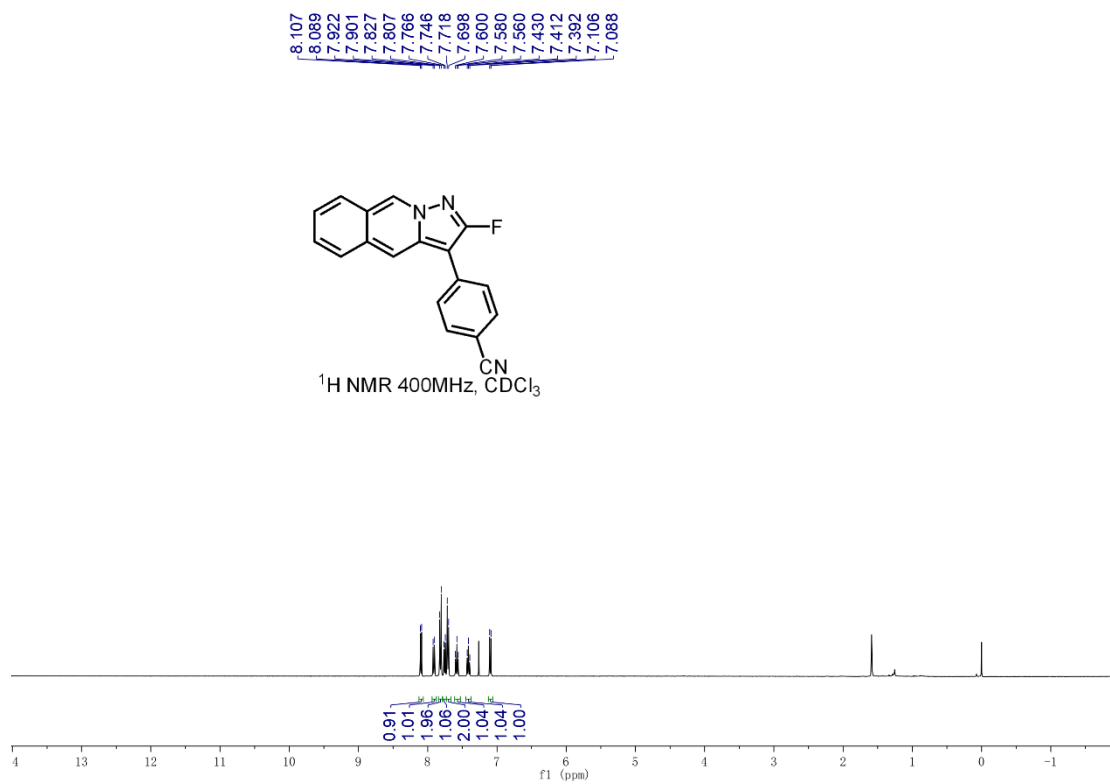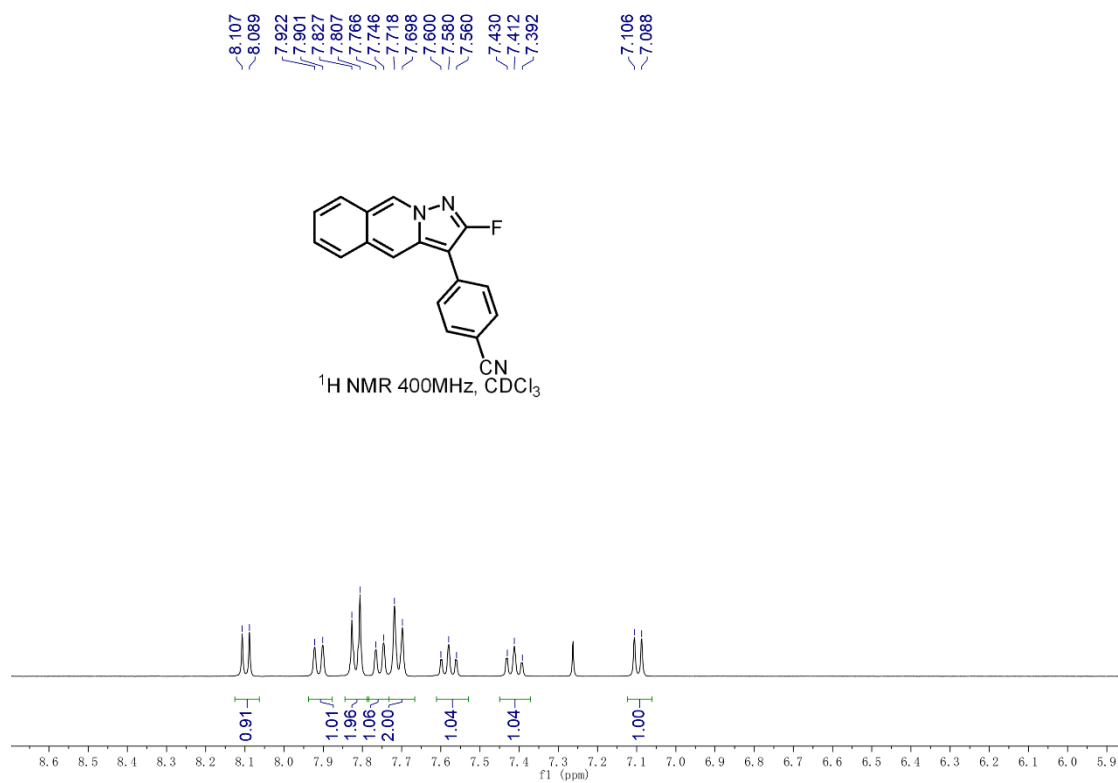

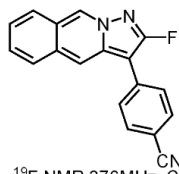

$^{19}\text{F}$  NMR 376MHz,  $\text{CDCl}_3$

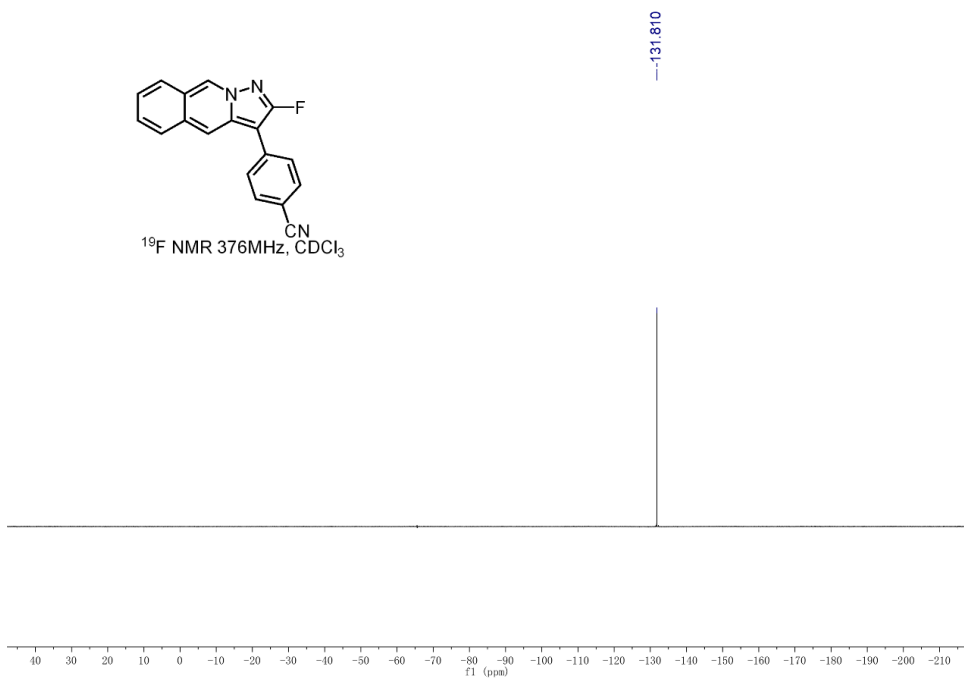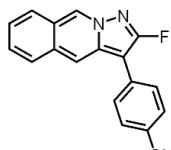

$^{13}\text{C}$  NMR 150MHz,  $\text{CDCl}_3$

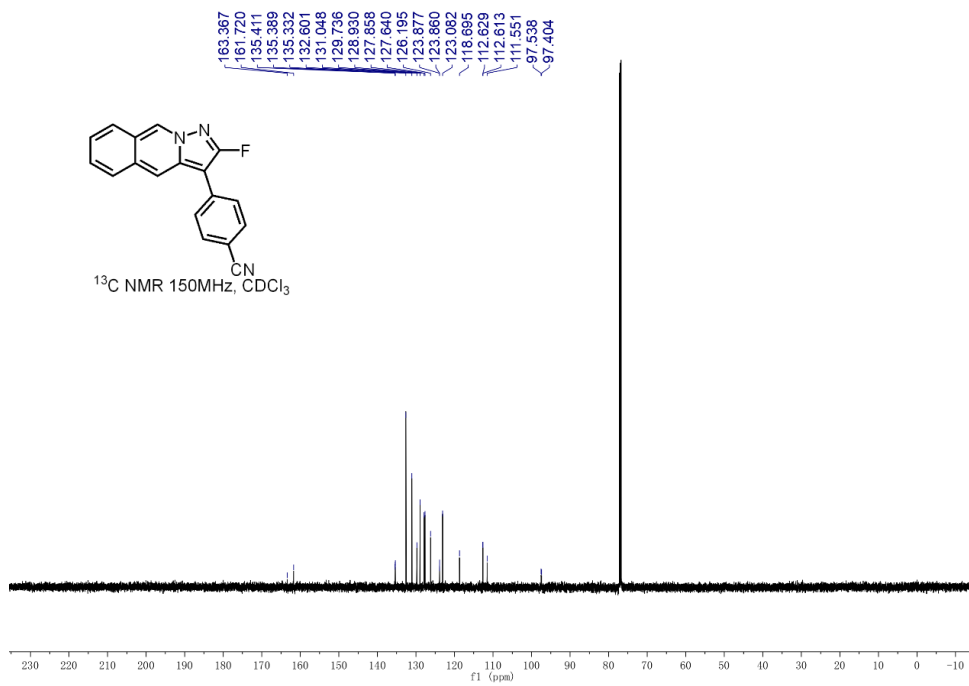

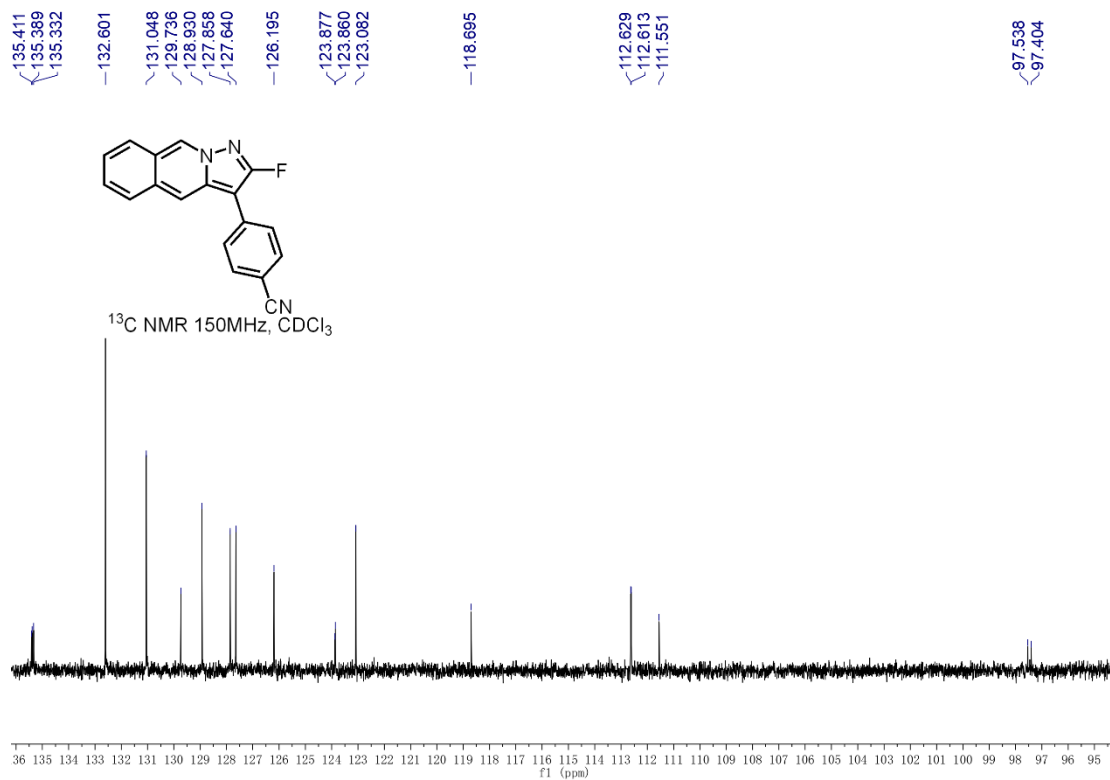

HRMS (ESI) copy of compound **3q**:

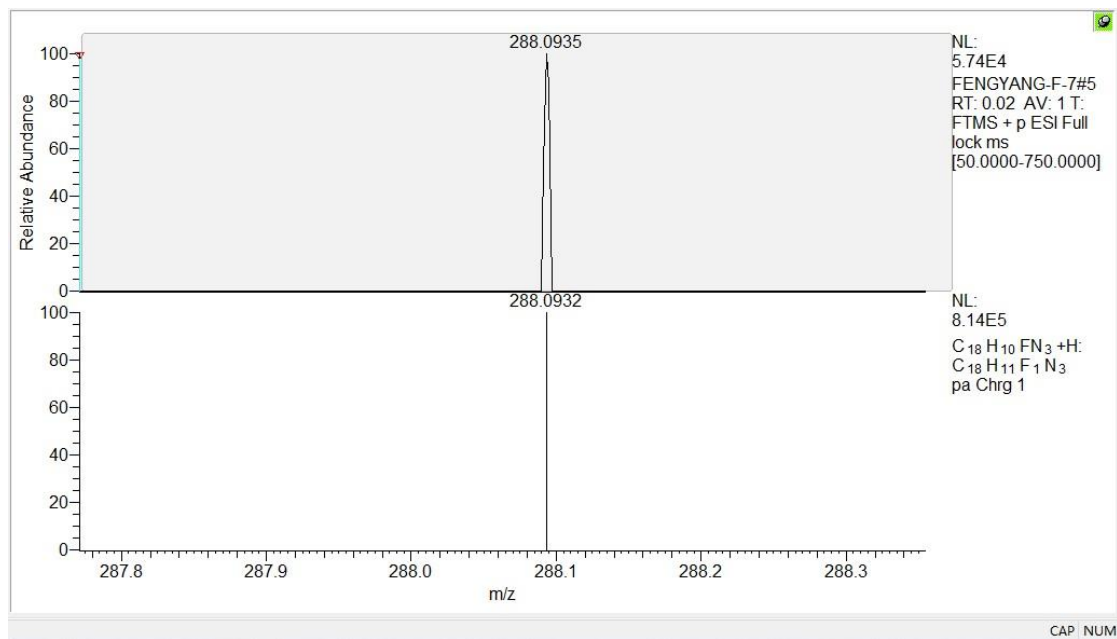

NMR copies of compound **4a**:

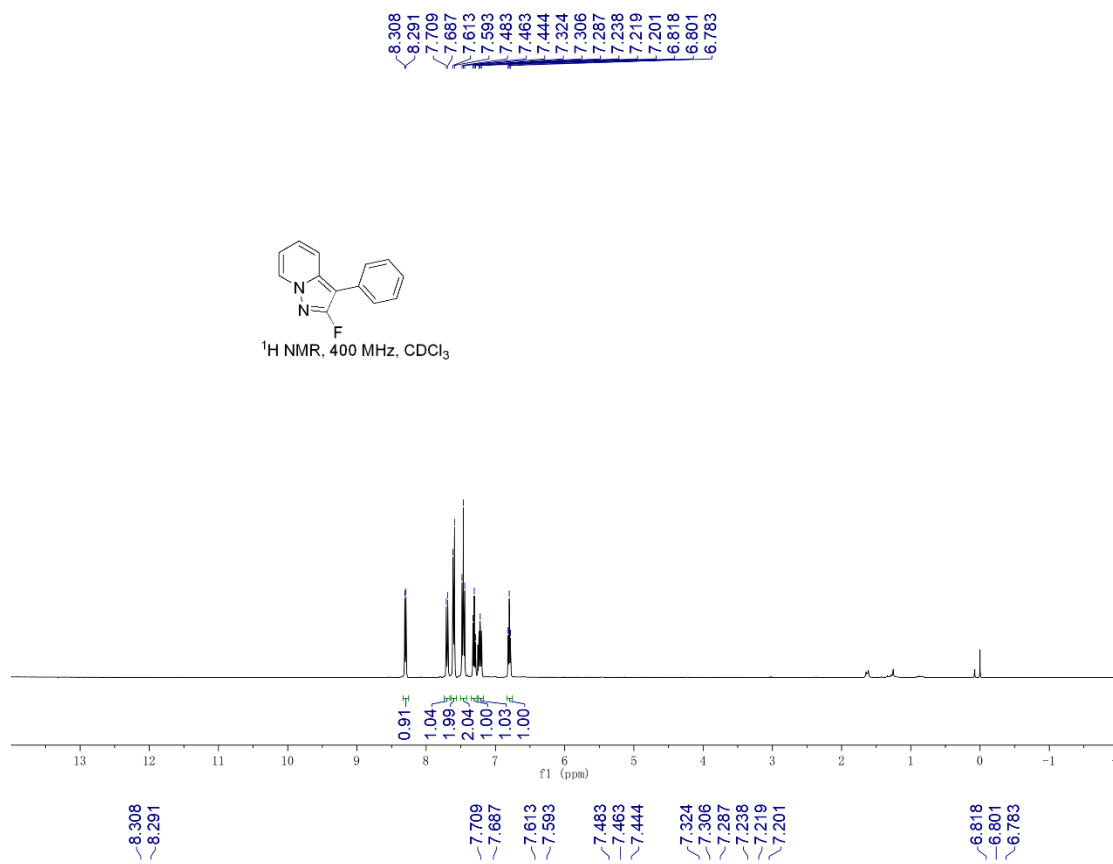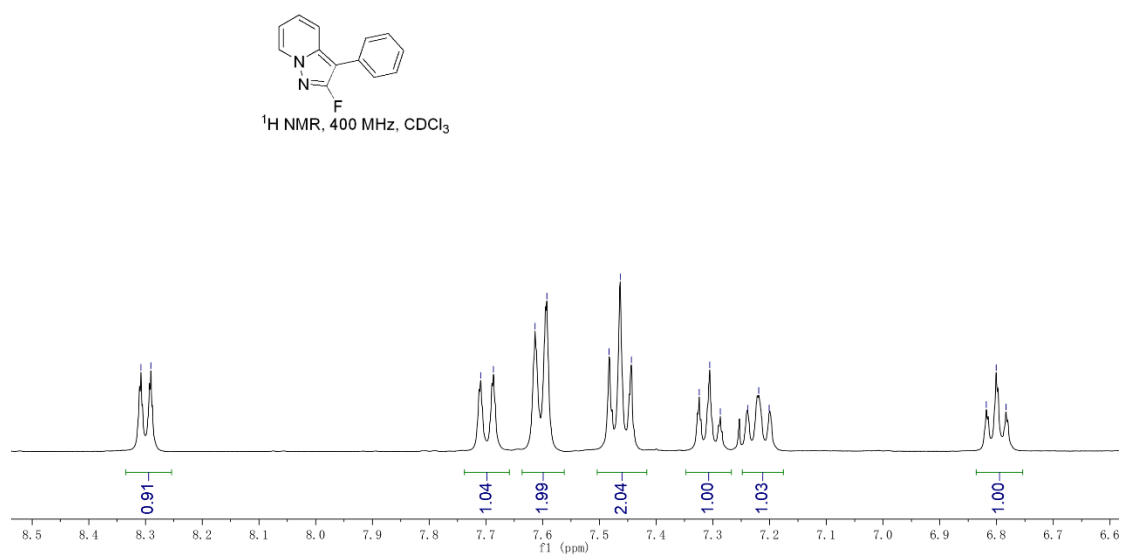

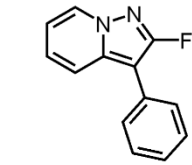

<sup>19</sup>F NMR 376MHz, CDCl<sub>3</sub>

--130.217

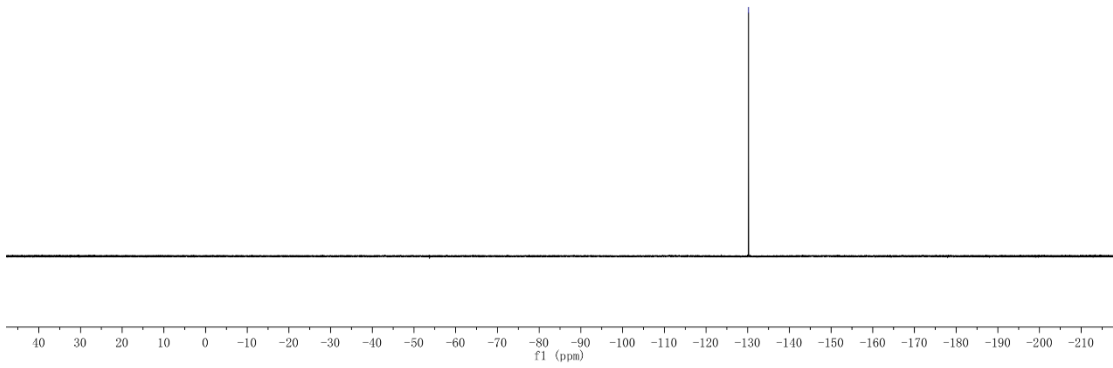

163.817  
162.166  
138.519  
138.508  
130.139  
130.112  
128.992  
128.934  
127.542  
127.528  
126.508  
125.168  
116.790  
116.765  
111.929  
111.910  
94.452

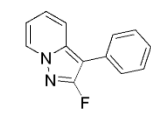

<sup>13</sup>C NMR, 150 MHz, CDCl<sub>3</sub>

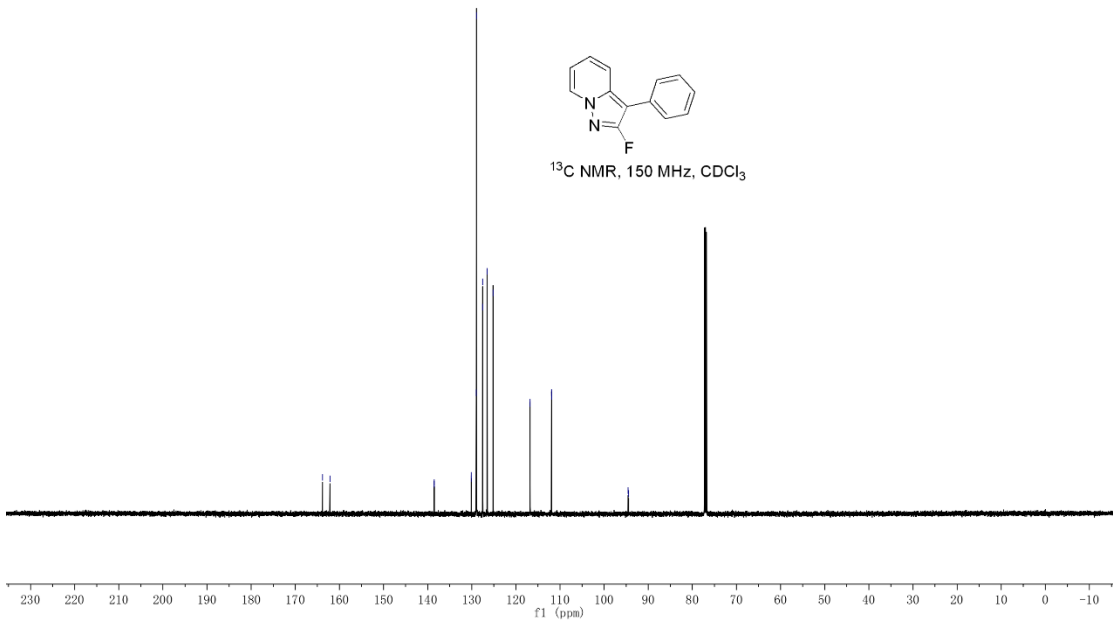

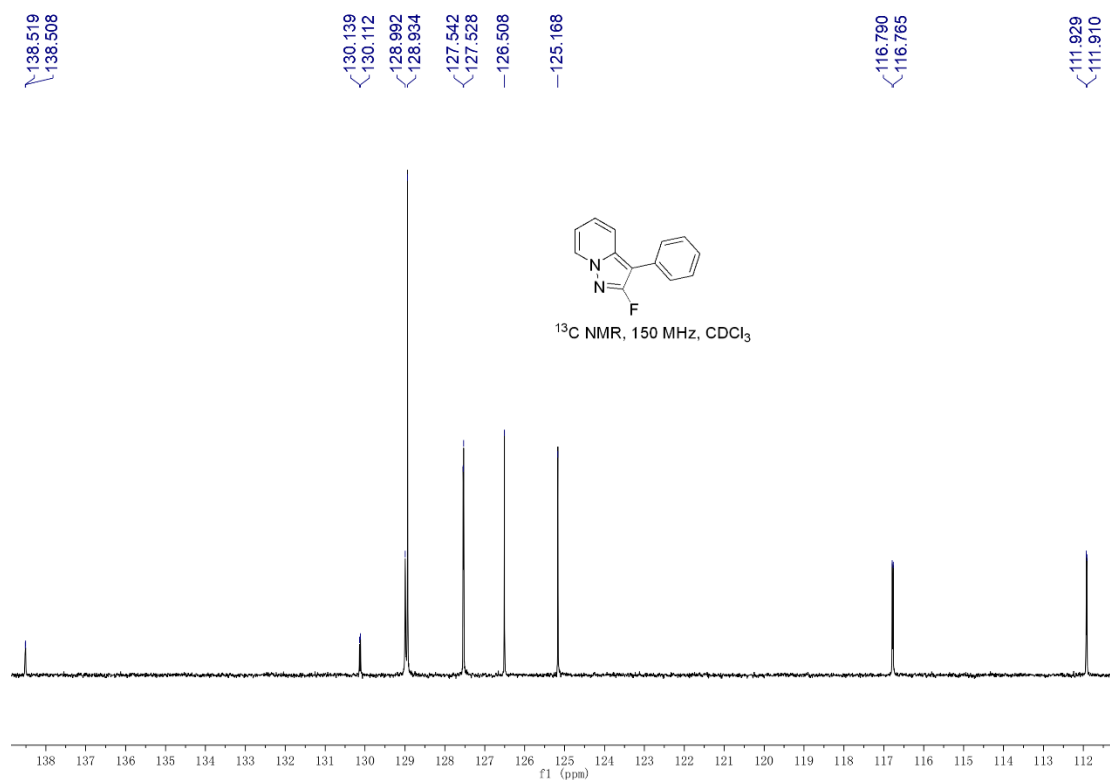

HRMS (ESI) copy of compound **4a**:

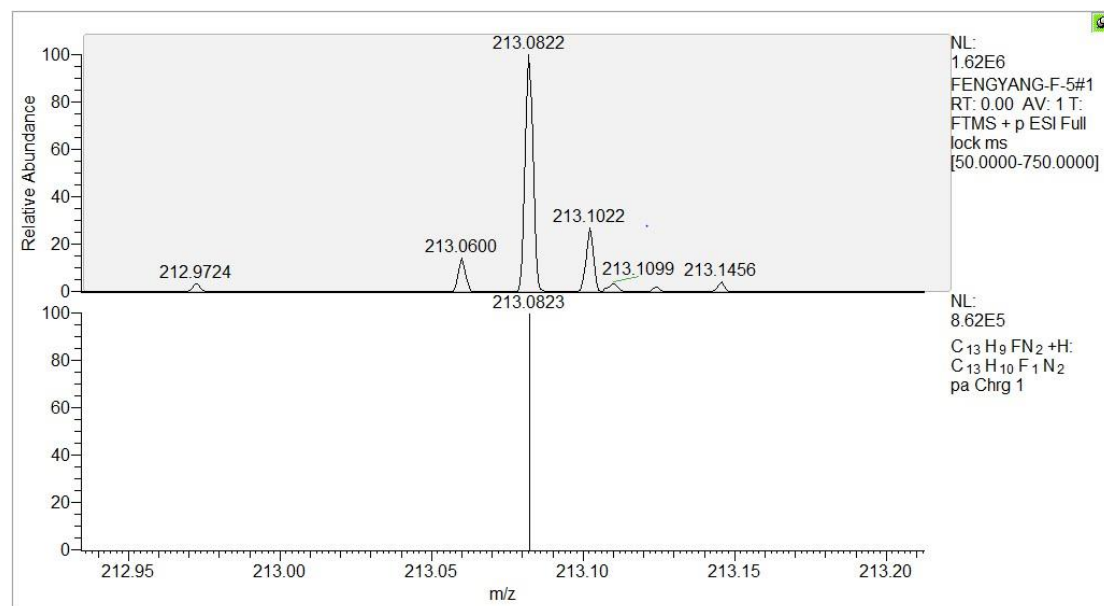

NMR copies of compound **4b**:

8.327  
8.309  
7.325  
7.305  
7.286  
7.185  
7.166  
7.145  
6.817  
6.796  
6.779

2.291

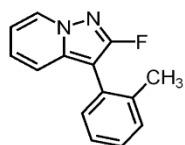

<sup>1</sup>H NMR 400MHz, CDCl<sub>3</sub>

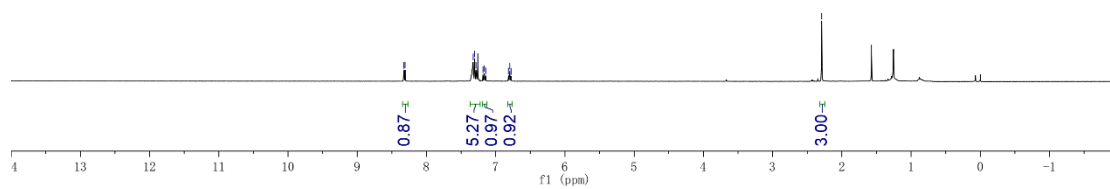

8.327  
8.309

7.325  
7.305  
7.286

7.185  
7.166  
7.145

6.817  
6.796  
6.779

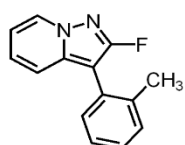

<sup>1</sup>H NMR 400MHz, CDCl<sub>3</sub>

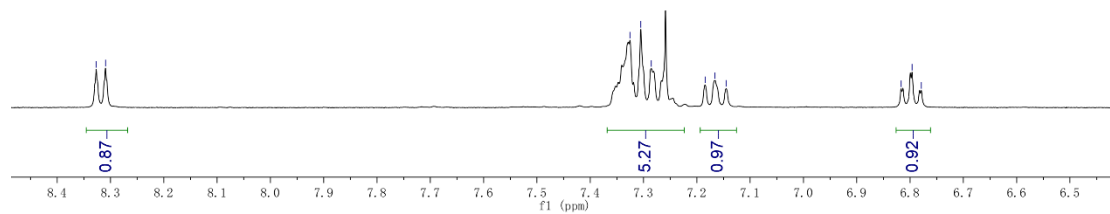

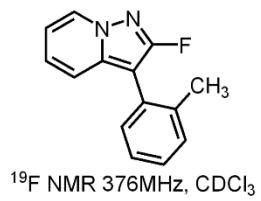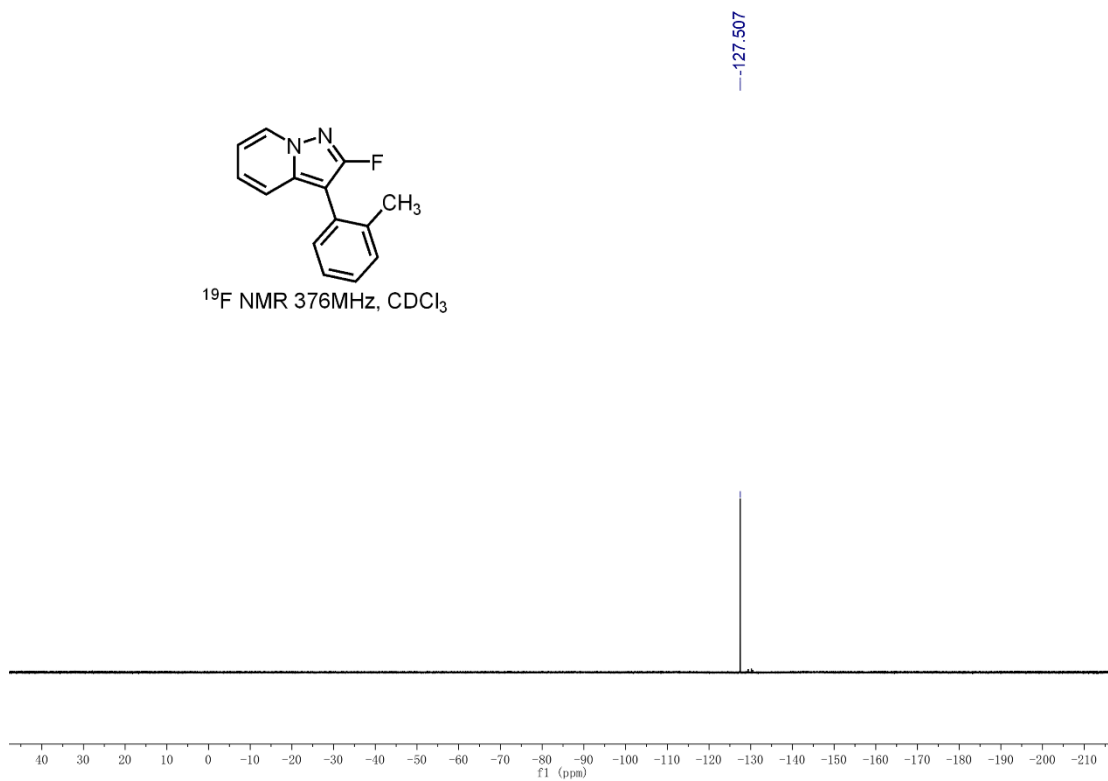

163.624  
 161.977  
 139.411  
 139.393  
 137.751  
 130.793  
 130.559  
 128.723  
 128.490  
 128.470  
 127.836  
 125.844  
 124.631  
 116.771  
 116.745  
 111.706  
 111.686  
 94.133  
 93.993

-19.973

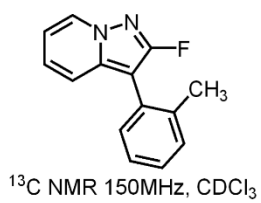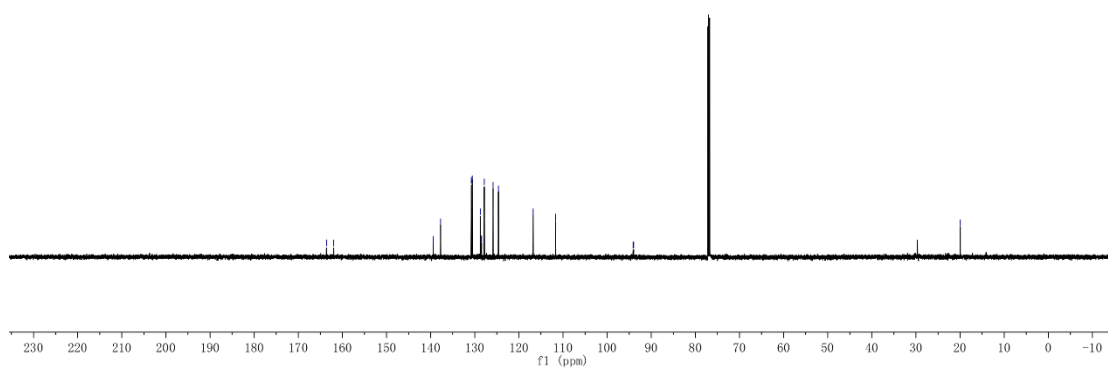



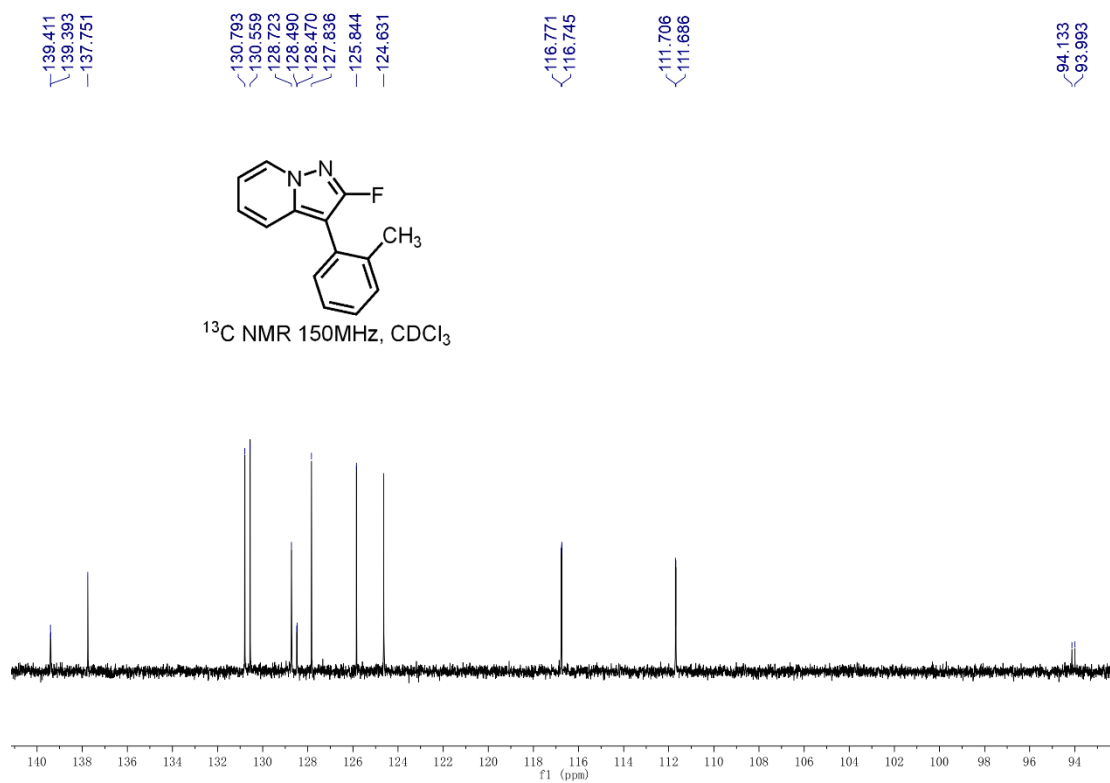

HRMS (ESI) copy of compound **4b**:

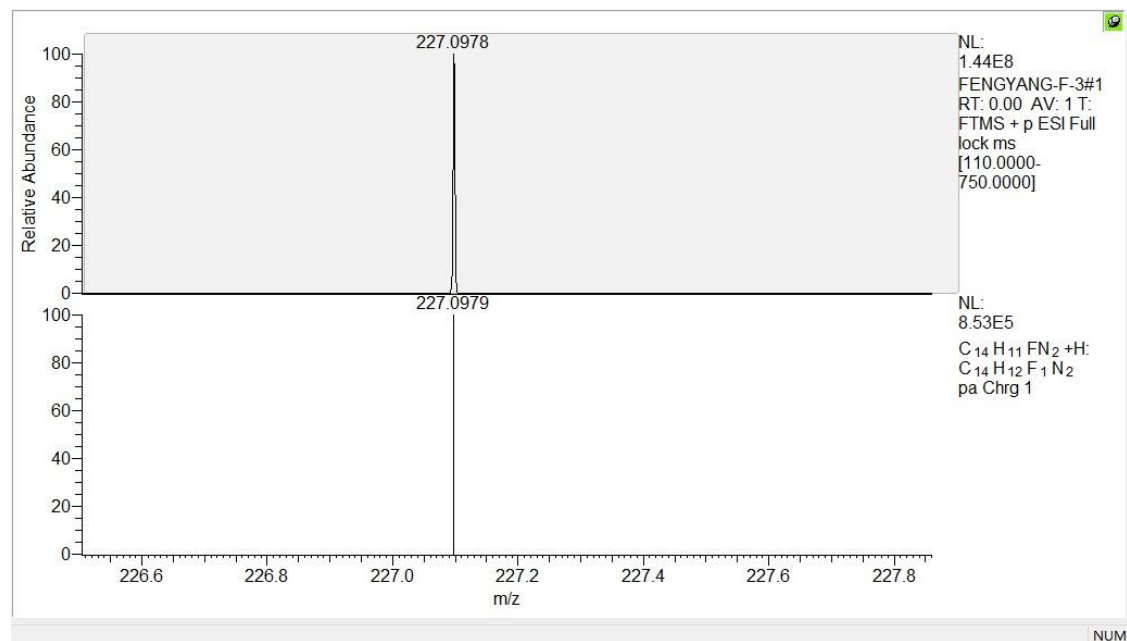

NMR copies of compound **4c**:

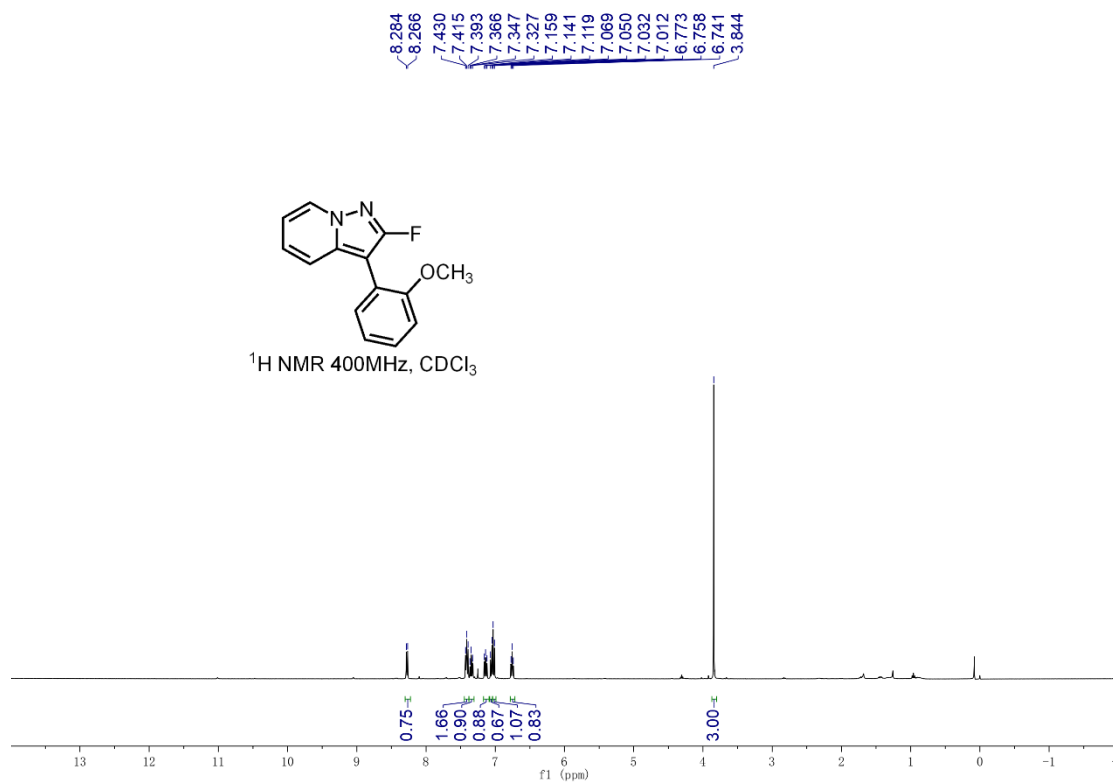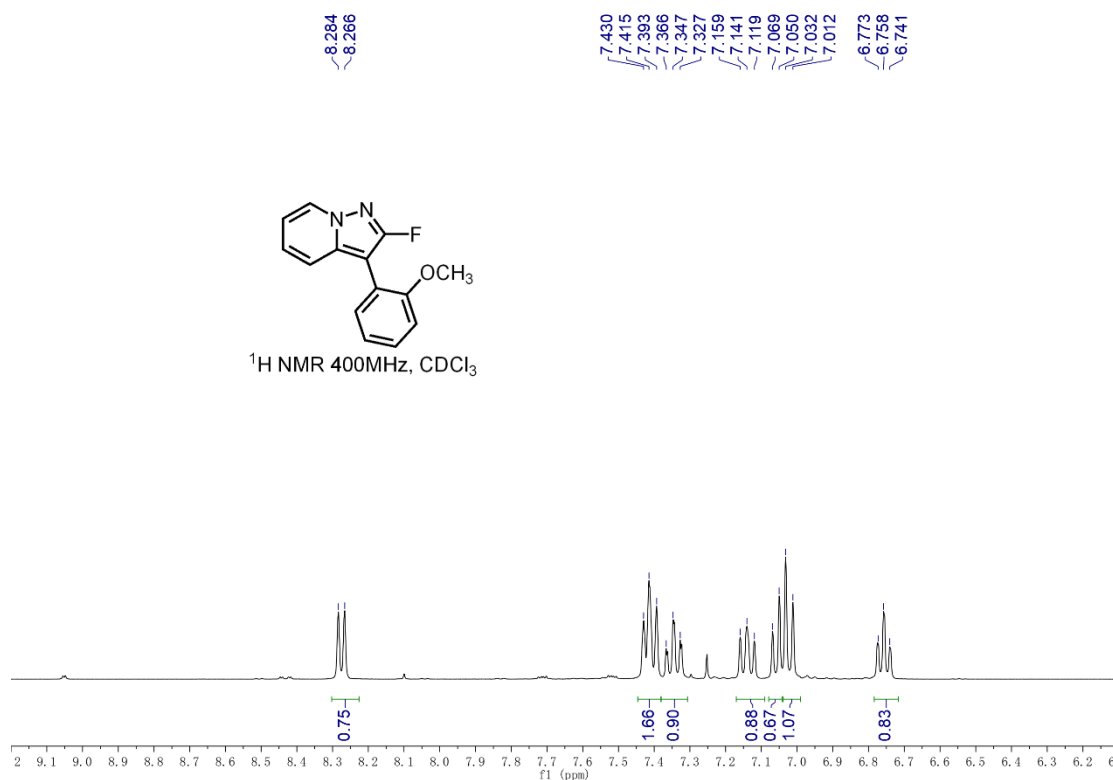

—128.315

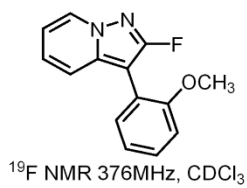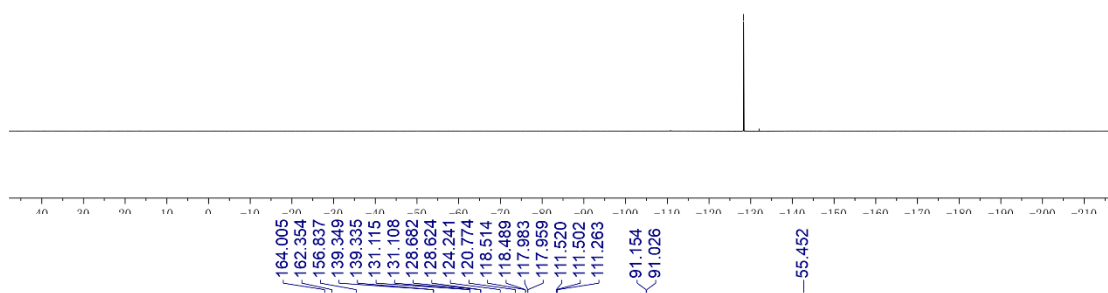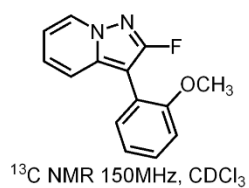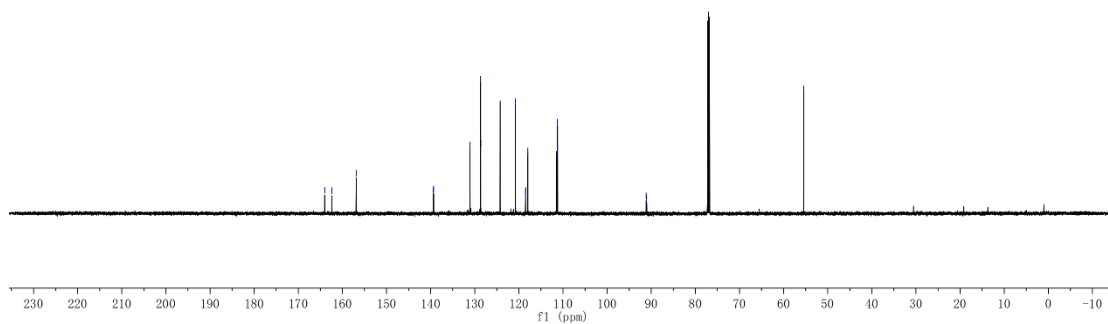

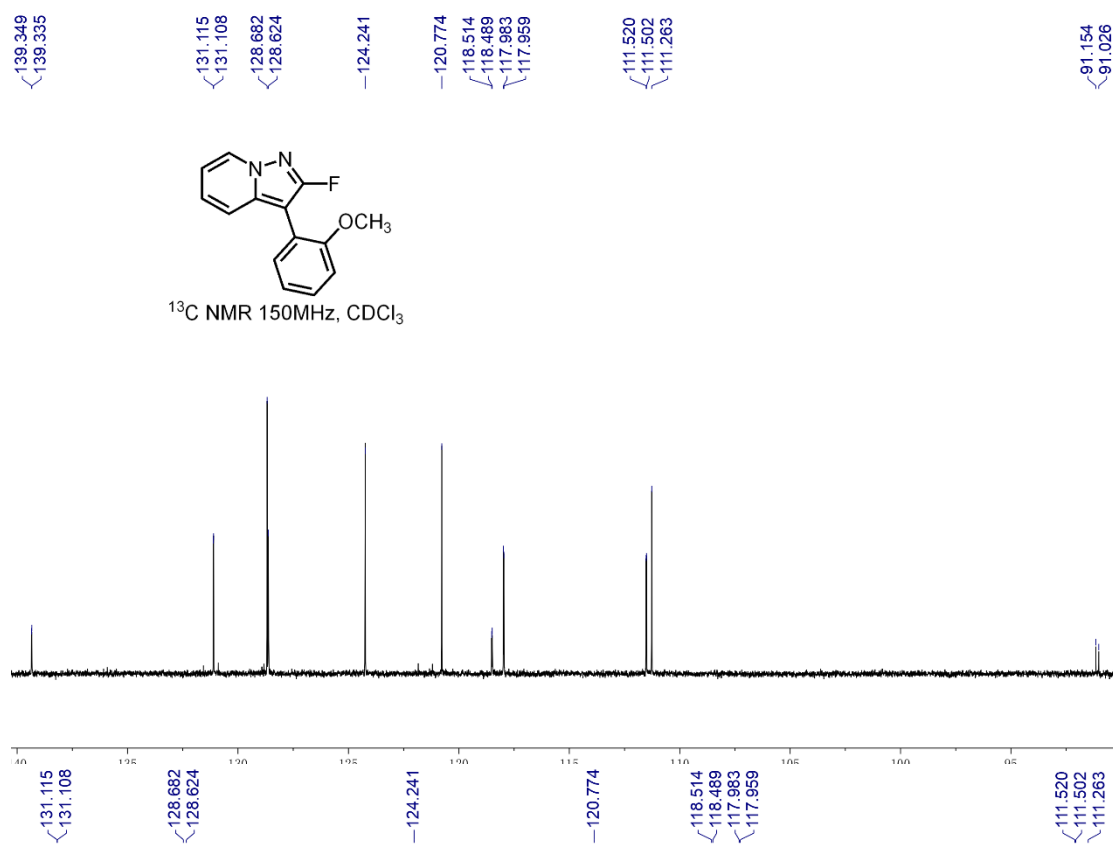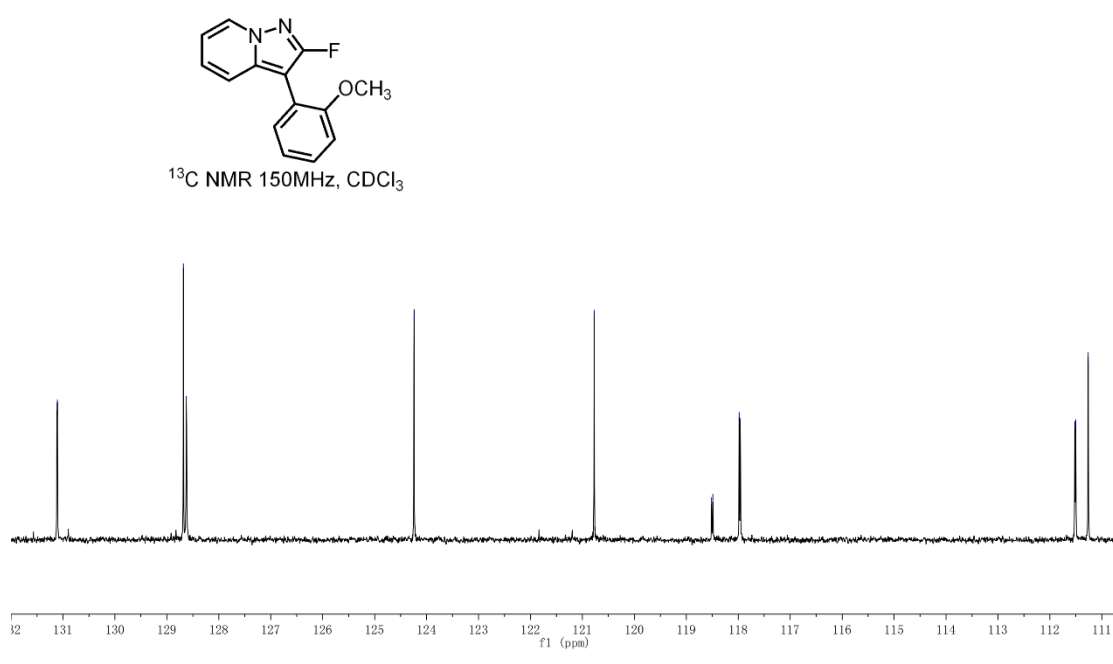

HRMS (ESI) copy of compound **4c**:

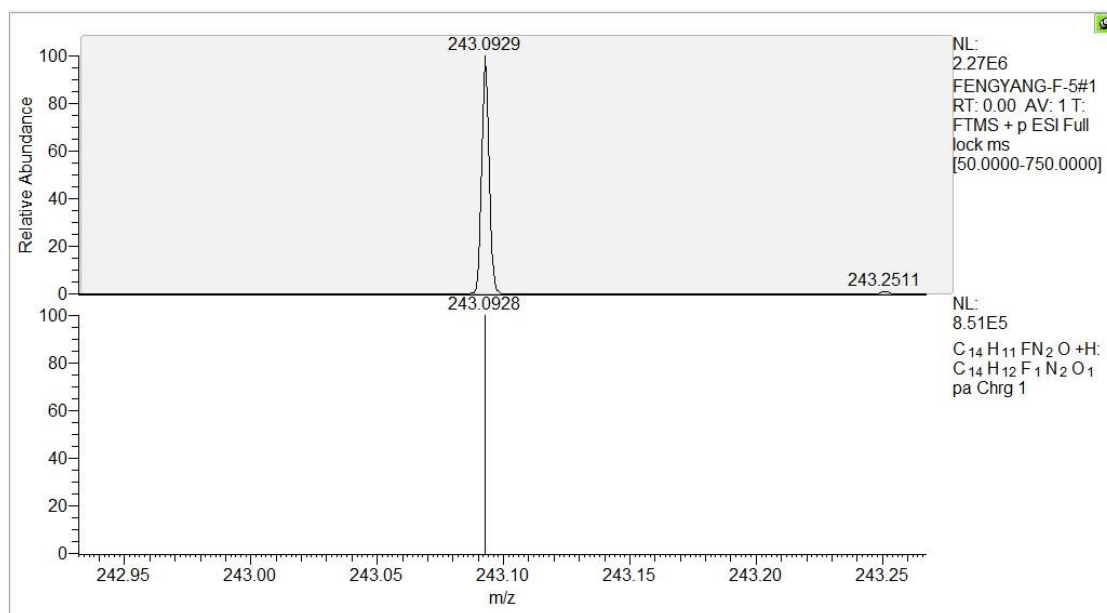

NMR copies of compound **4d**:

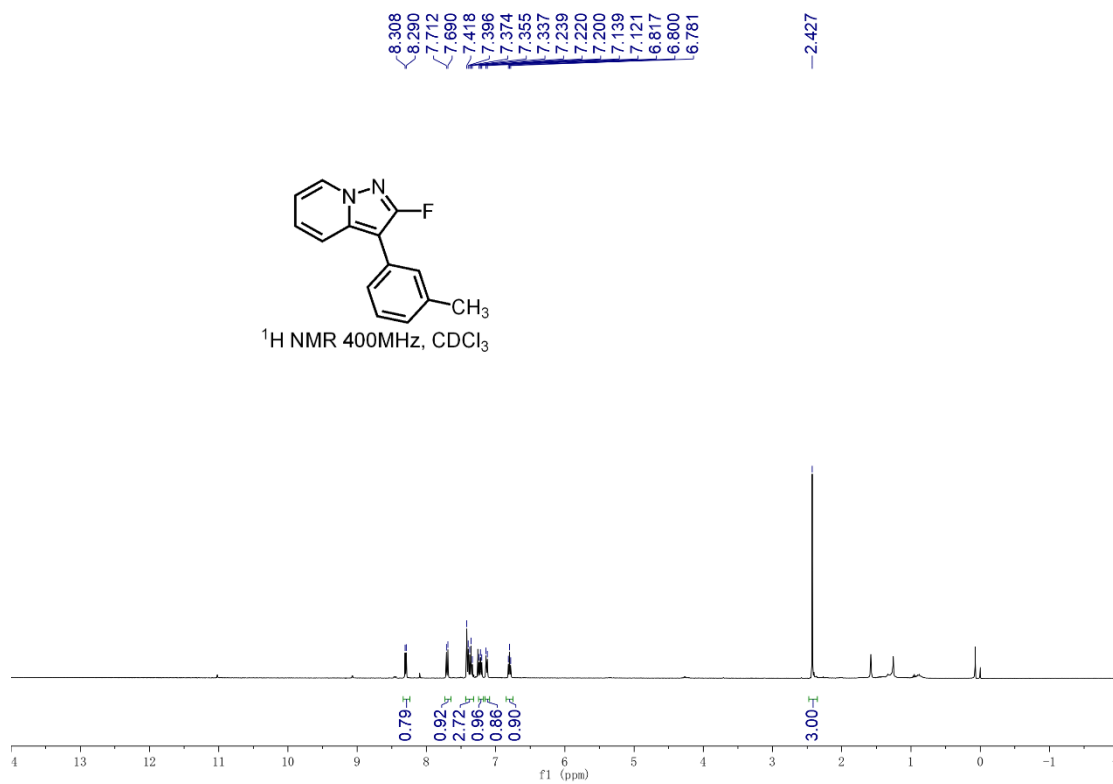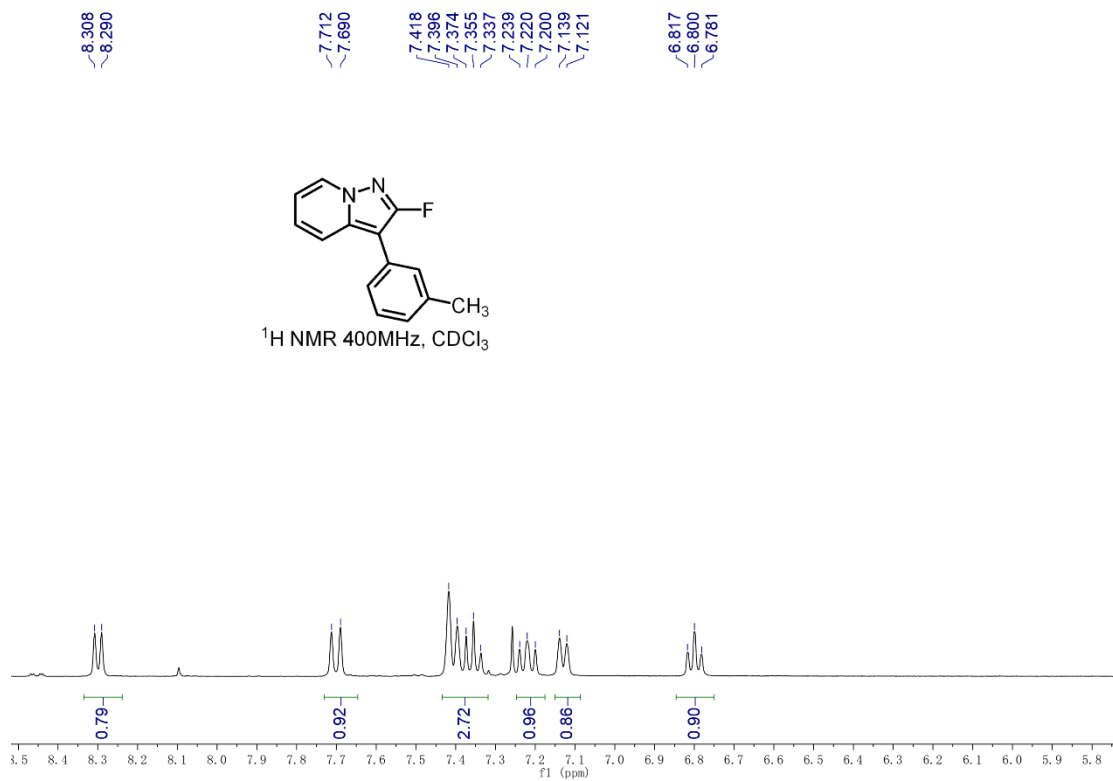

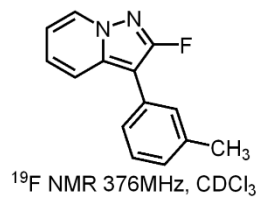

--130.168

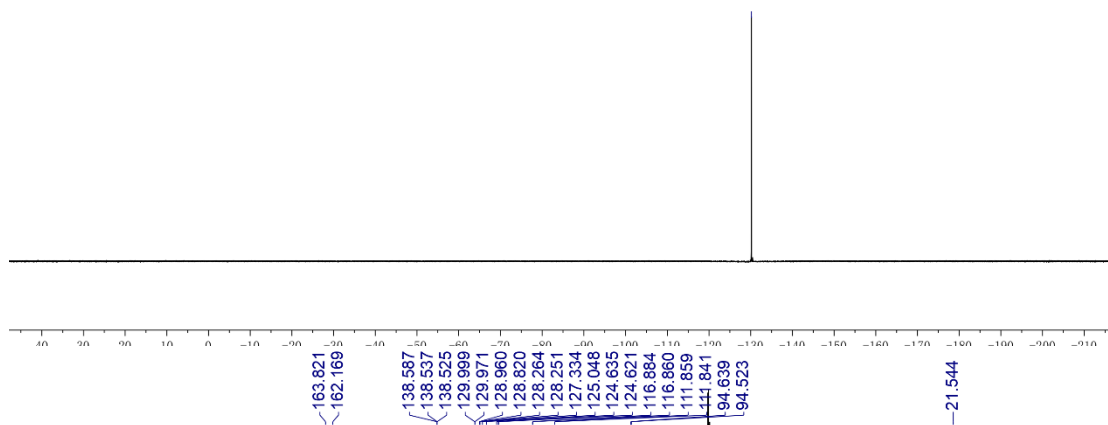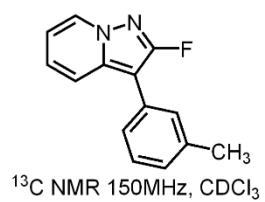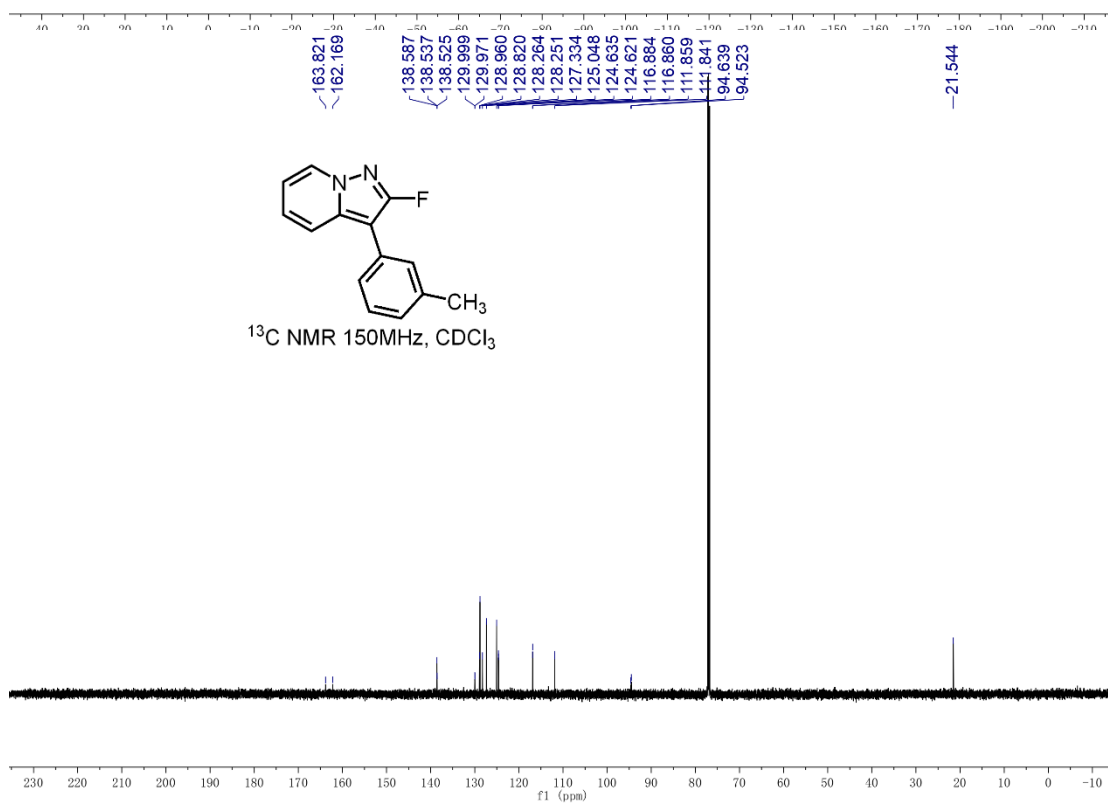

138.587  
138.537  
138.525

129.999  
129.971  
128.960  
128.820  
128.264  
128.251  
127.334

125.048  
124.635  
124.621

116.884  
116.860

111.859  
111.841

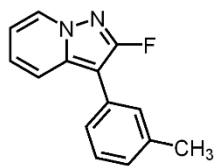

<sup>13</sup>C NMR 150MHz, CDCl<sub>3</sub>

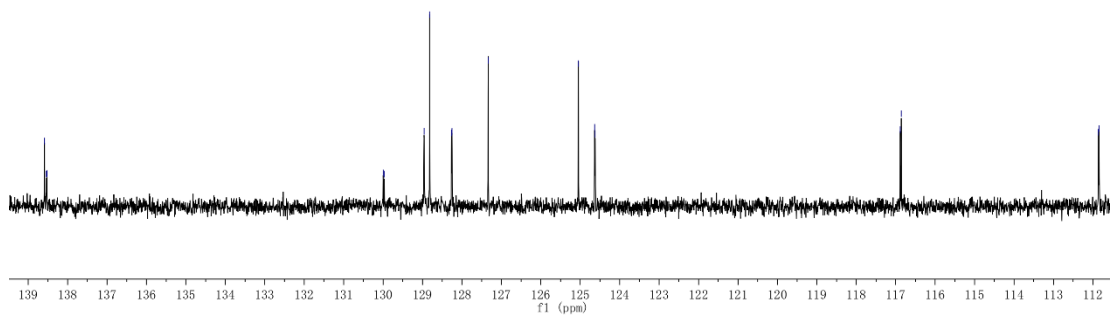



# HRMS (ESI) copy of compound 4d:

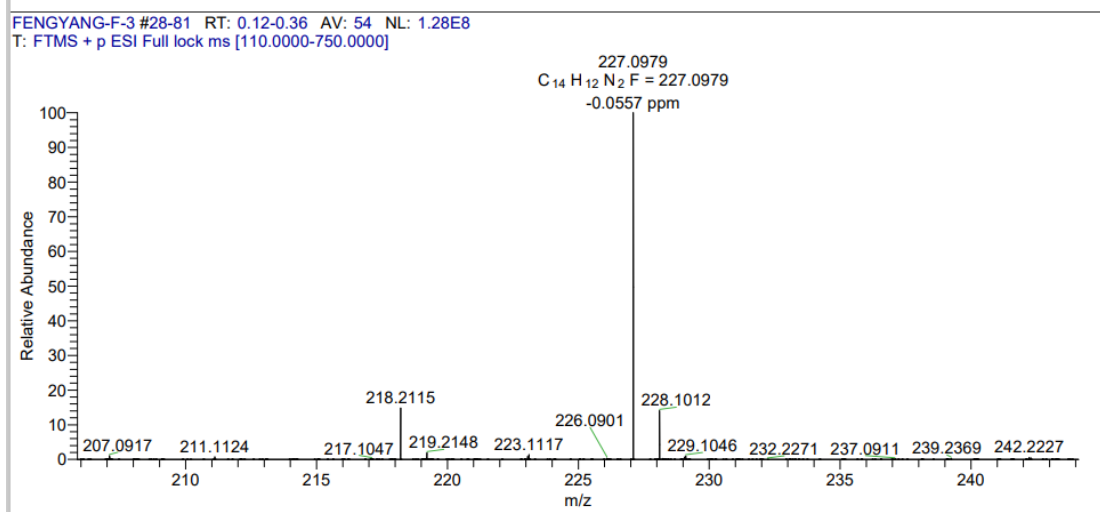

FENGYANG-F-3#28-81 RT: 0.12-0.36 AV: 54  
T: FTMS + p ESI Full lock ms [110.0000-750.0000]  
m/z= 205.8616-244.1026

| m/z      | Intensity   | Relative | Theo. Mass | Delta (ppm) | Composition                                      |
|----------|-------------|----------|------------|-------------|--------------------------------------------------|
| 218.2115 | 19313520.0  | 15.11    |            |             |                                                  |
| 219.2148 | 2376029.8   | 1.86     |            |             |                                                  |
| 227.0979 | 127850728.0 | 100.00   | 227.0979   | -0.01       | C <sub>14</sub> H <sub>12</sub> N <sub>2</sub> F |
| 228.1012 | 18390356.0  | 14.38    |            |             |                                                  |

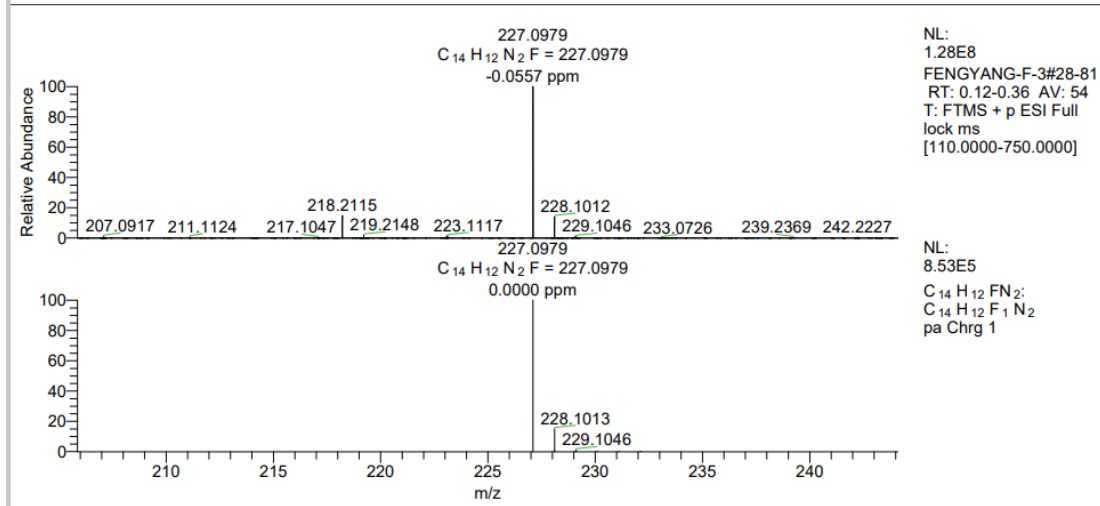

NMR copies of compound **4e**:

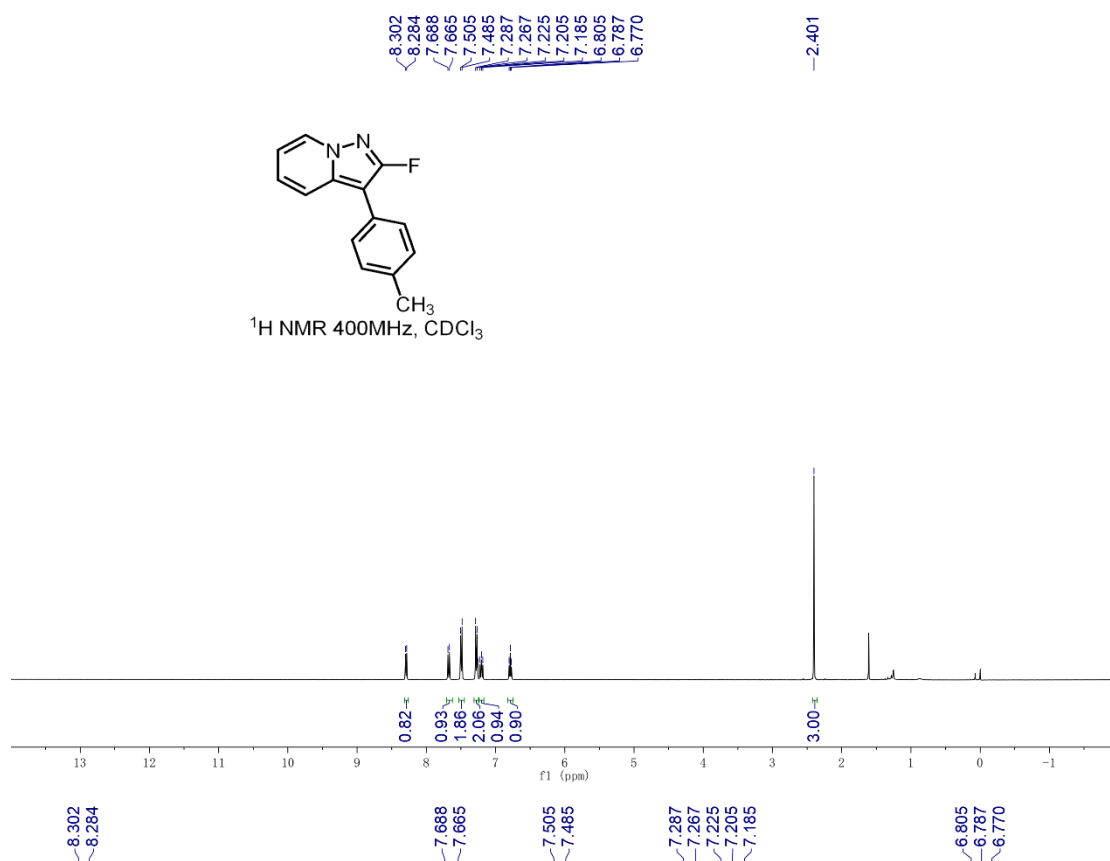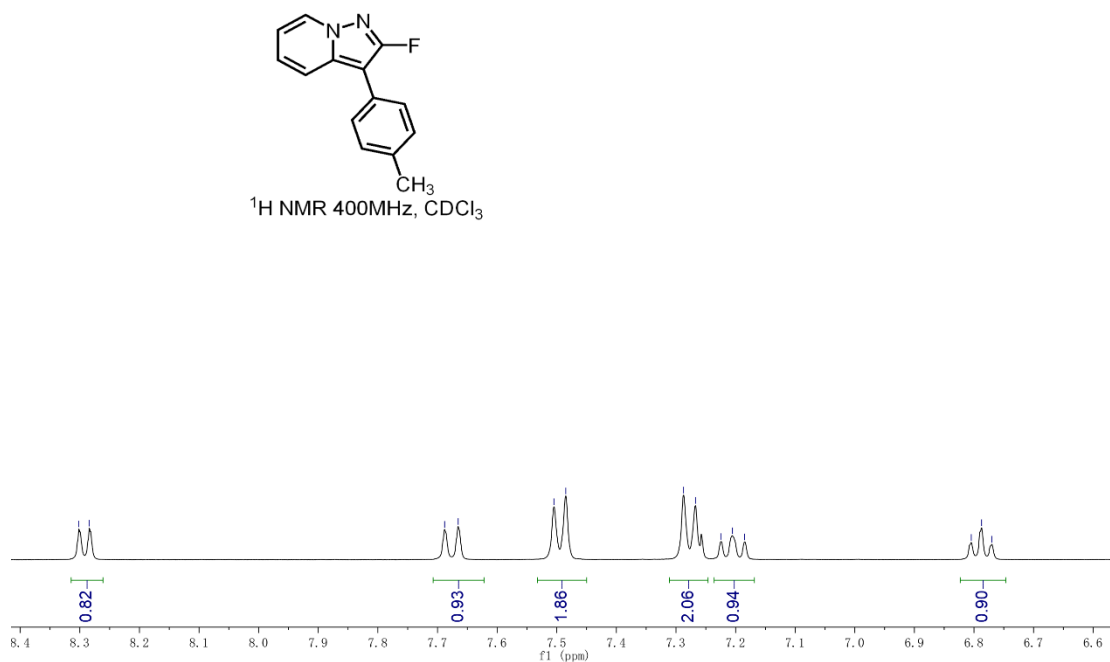

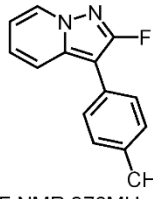

$^{19}\text{F}$  NMR 376MHz,  $\text{CDCl}_3$

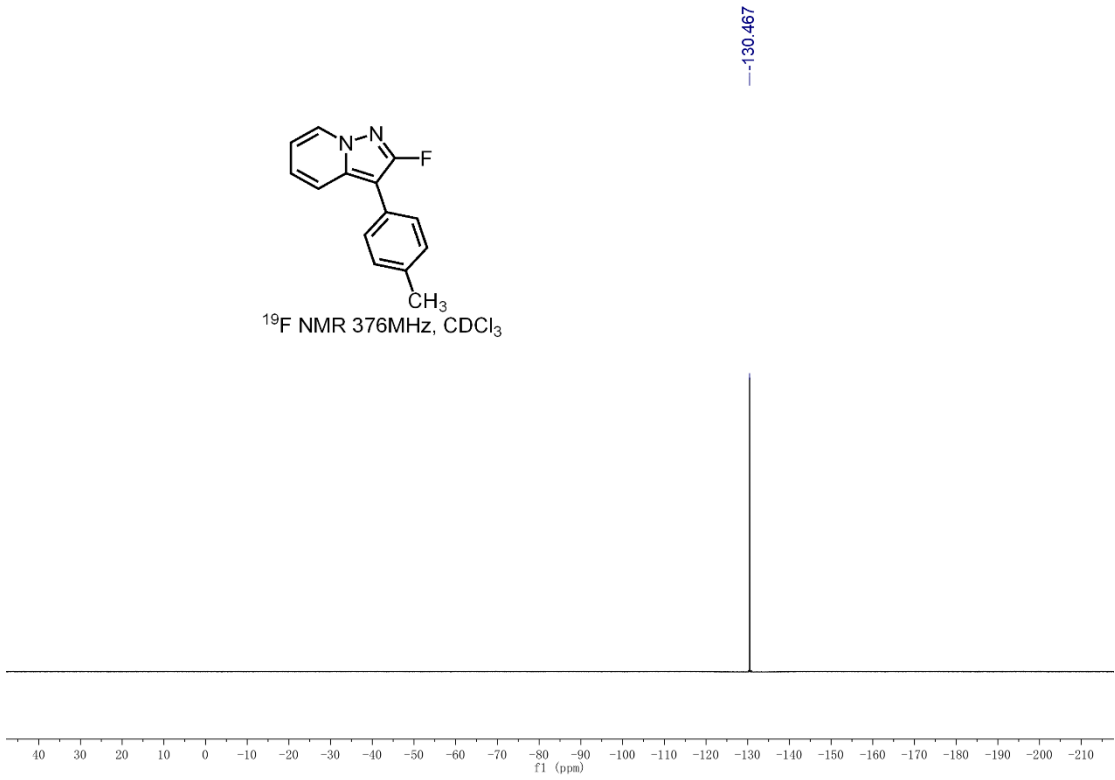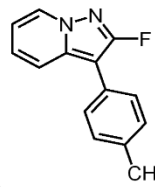

$^{13}\text{C}$  NMR 150MHz,  $\text{CDCl}_3$

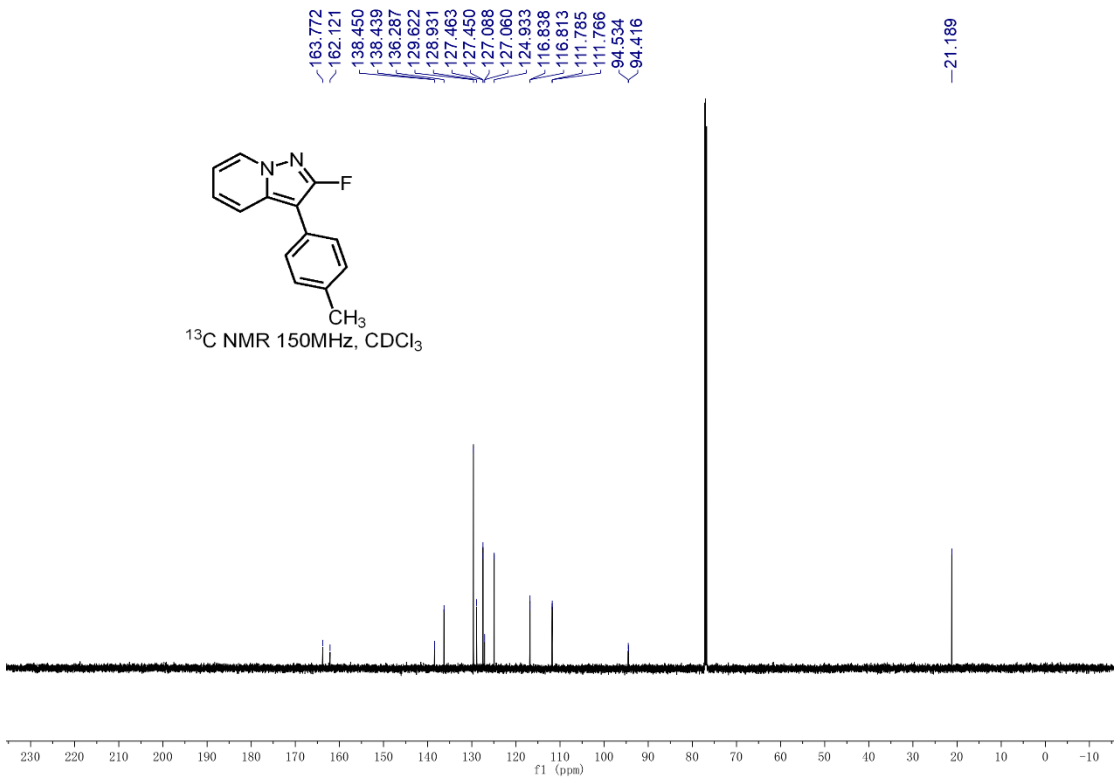

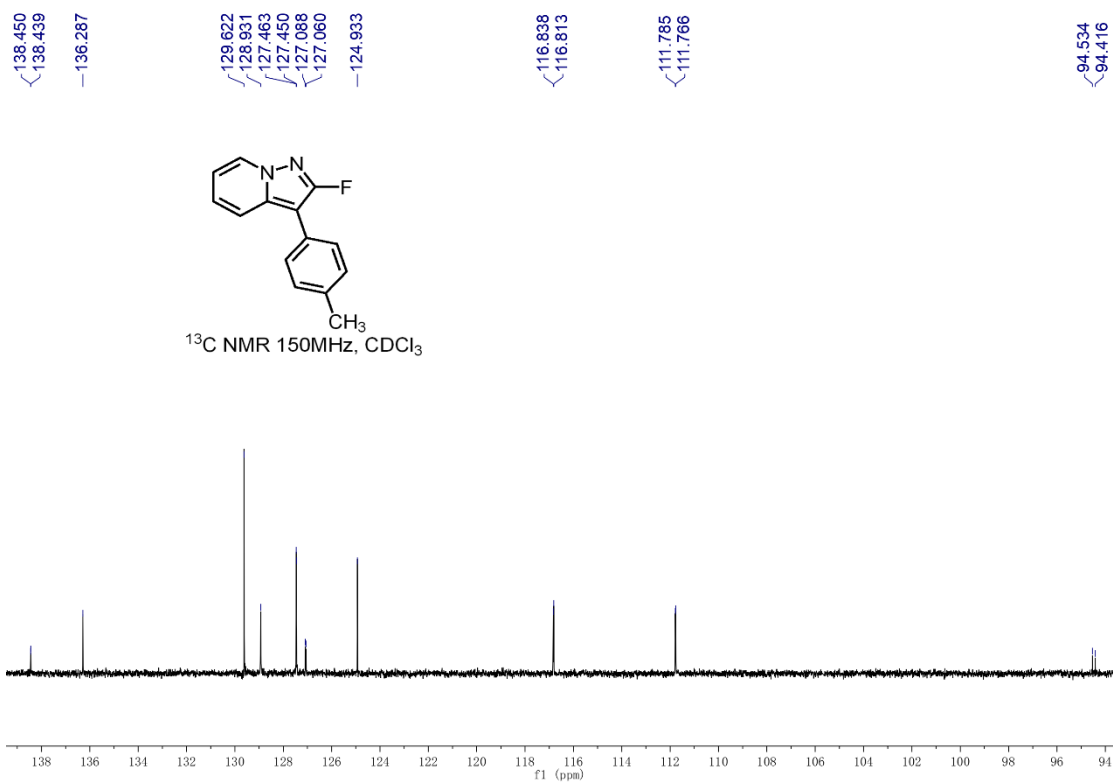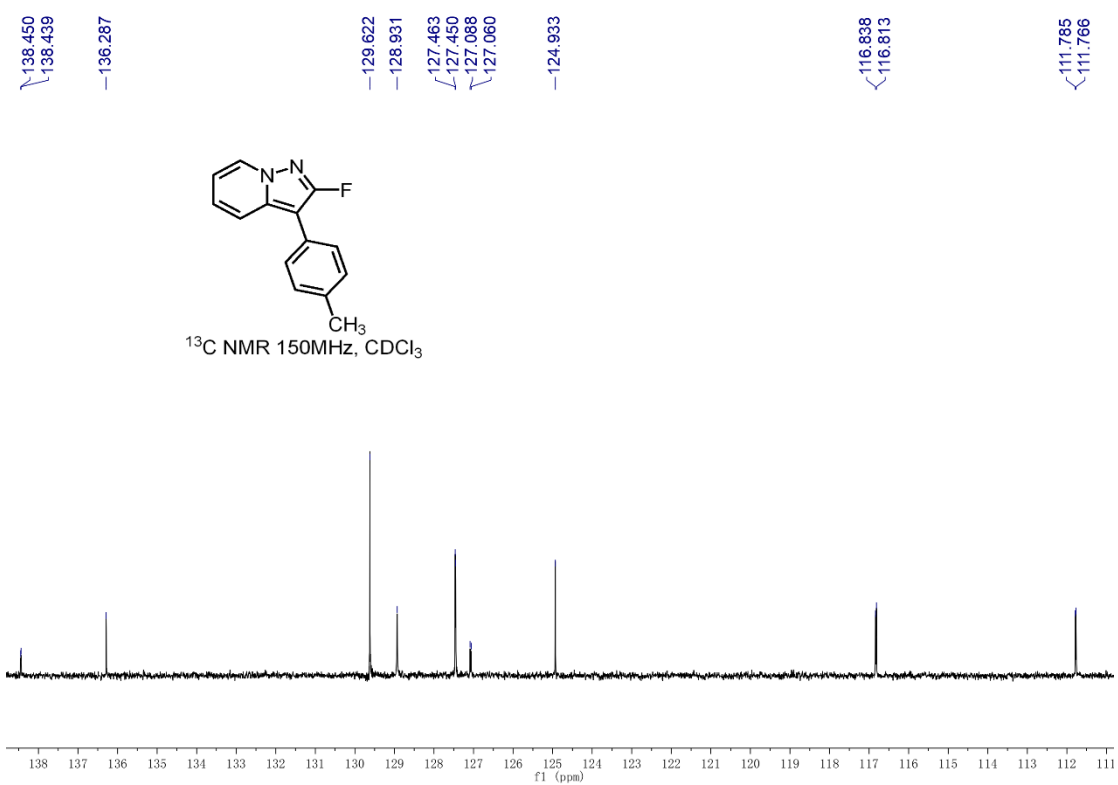

# HRMS (ESI) copy of compound 4e:

G:\FENGYANG-F-1

06/12/23 16:54:31

FENGYANG-F-1#33-84 RT: 0.15-0.37 AV: 52 NL: 5.55E8  
T: FTMS + p ESI Full lock ms [50.0000-750.0000]

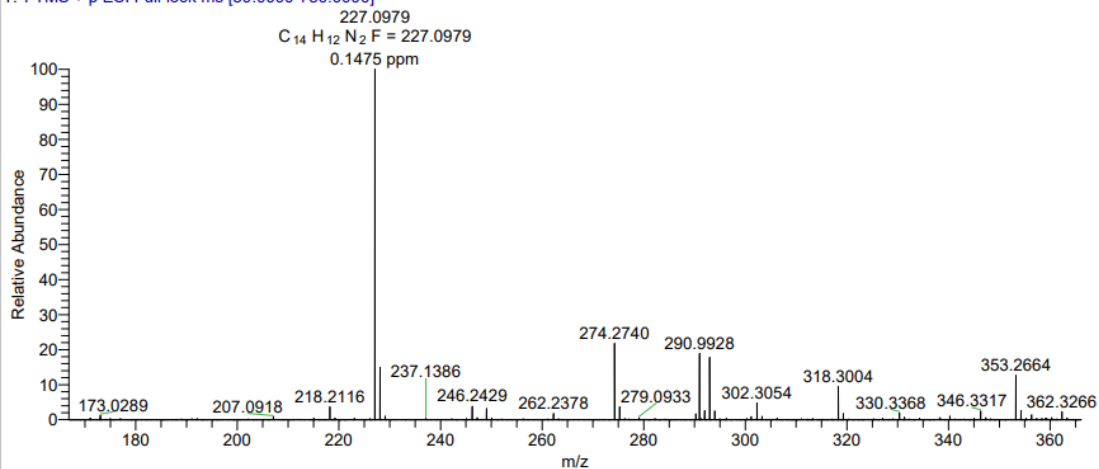

FENGYANG-F-1#33-84 RT: 0.15-0.37 AV: 52  
T: FTMS + p ESI Full lock ms [50.0000-750.0000]  
m/z = 166.8237-366.0834

| m/z      | Intensity   | Relative | Theo. Mass | Delta (ppm) | Composition                                      |
|----------|-------------|----------|------------|-------------|--------------------------------------------------|
| 227.0979 | 556098944.0 | 100.00   | 227.0979   | 0.03        | C <sub>14</sub> H <sub>12</sub> N <sub>2</sub> F |
| 274.2740 | 121283104.0 | 21.81    |            |             |                                                  |
| 290.9928 | 105524232.0 | 18.98    |            |             |                                                  |
| 292.9907 | 100893896.0 | 18.14    |            |             |                                                  |

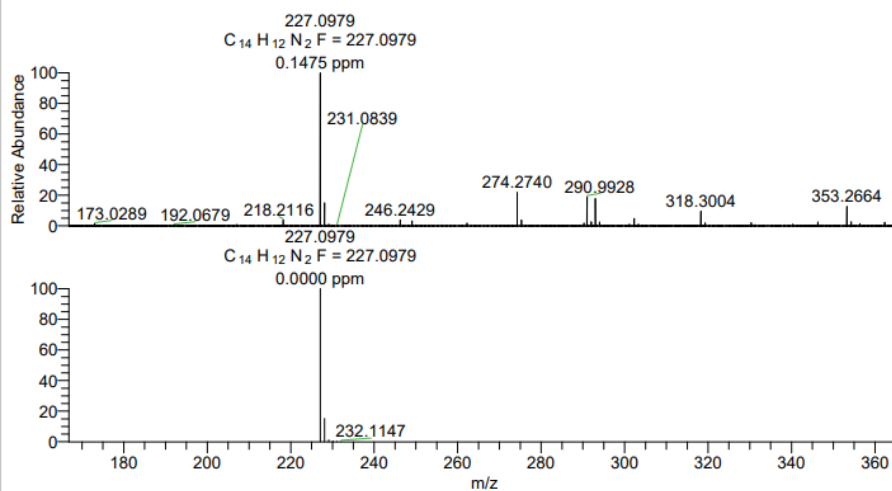

NL:  
5.55E8  
FENGYANG-F-1#33-  
84 RT: 0.15-0.37 AV:  
52 T: FTMS + p ESI  
Full lock ms  
[50.0000-750.0000]

NL:  
8.53E5  
C<sub>14</sub>H<sub>12</sub>FN<sub>2</sub>:  
C<sub>14</sub>H<sub>12</sub>F<sub>1</sub>N<sub>2</sub>:  
pa Chrg 1

NMR copies of compound **4f**:

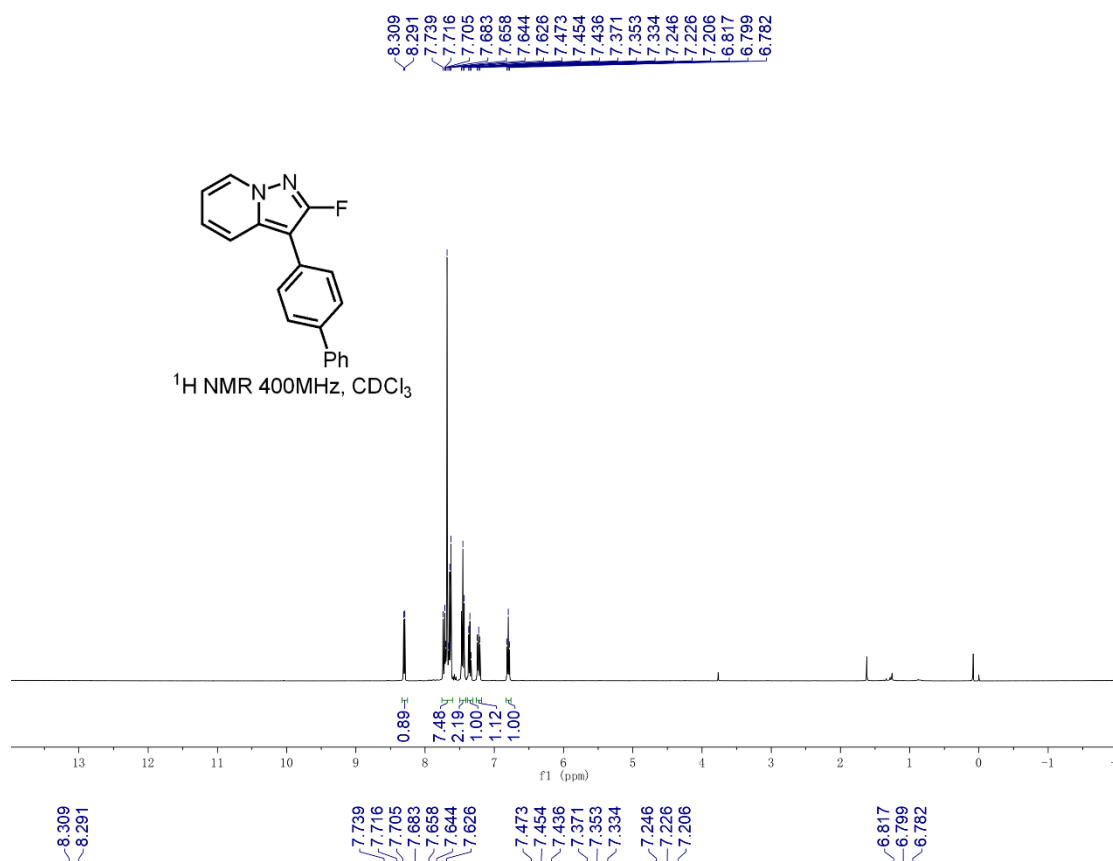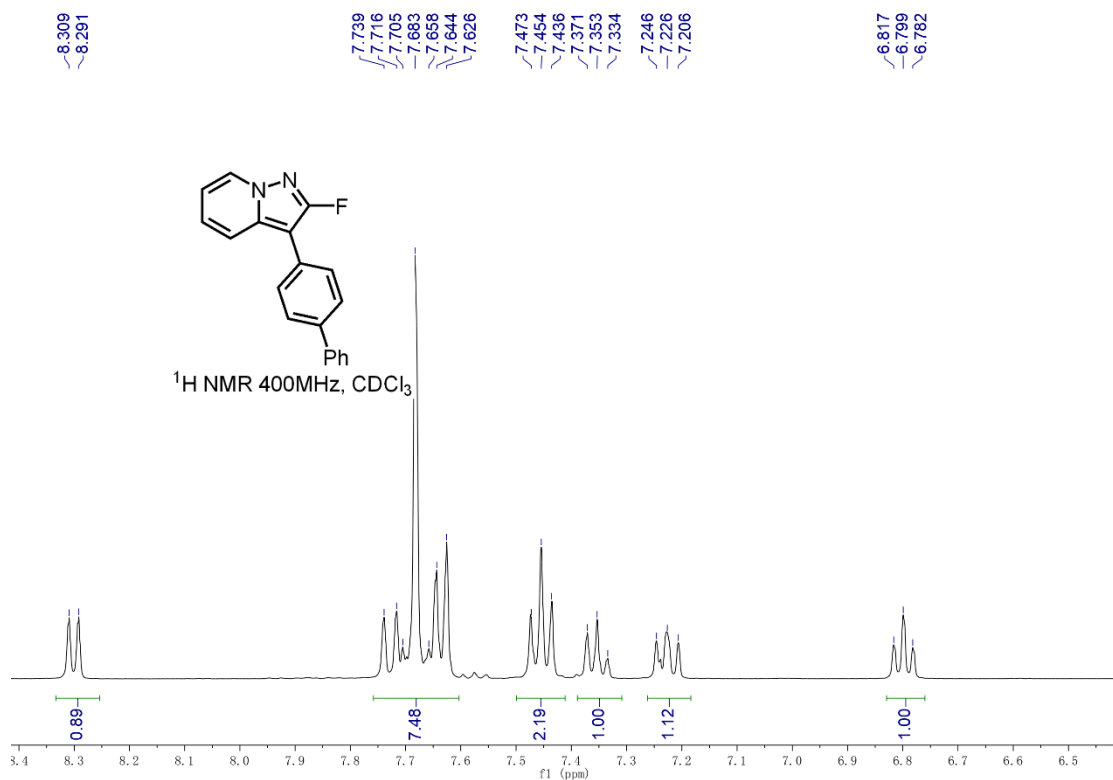

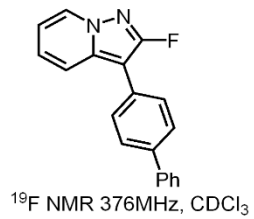

---129.737

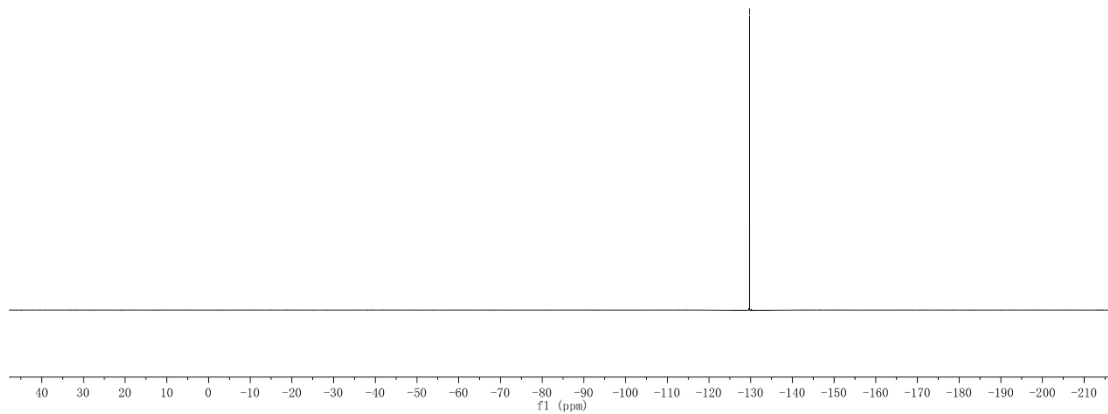

163.694  
 162.042  
 141.420  
 139.688  
 135.365  
 135.335  
 132.706  
 132.417  
 130.009  
 129.168  
 128.536  
 127.554  
 126.857  
 118.968  
 115.066  
 115.065  
 113.647  
 113.629  
 109.475  
 93.316  
 93.201

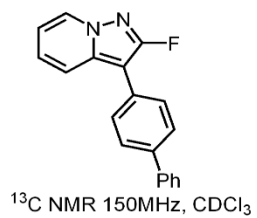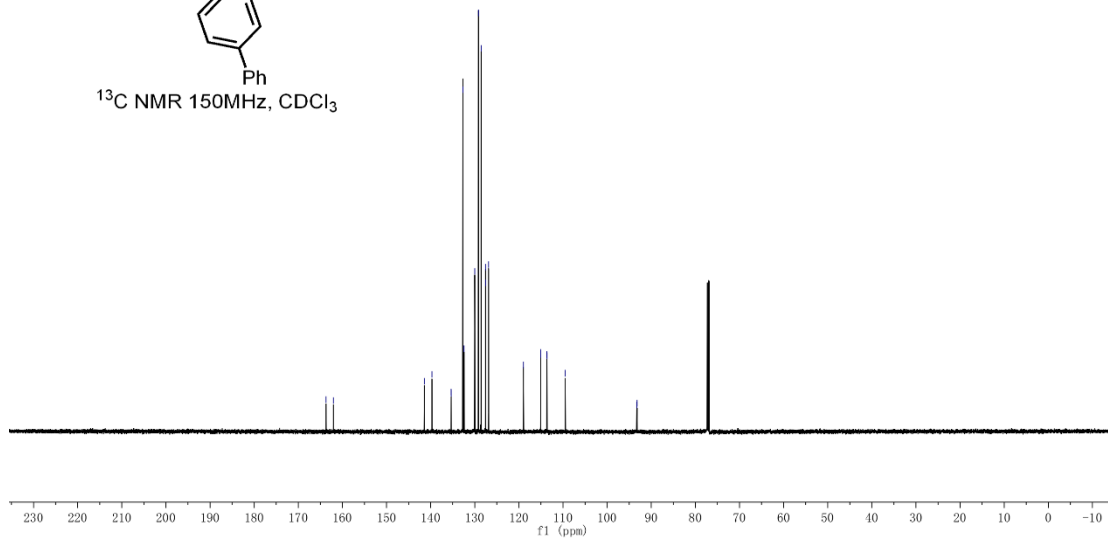

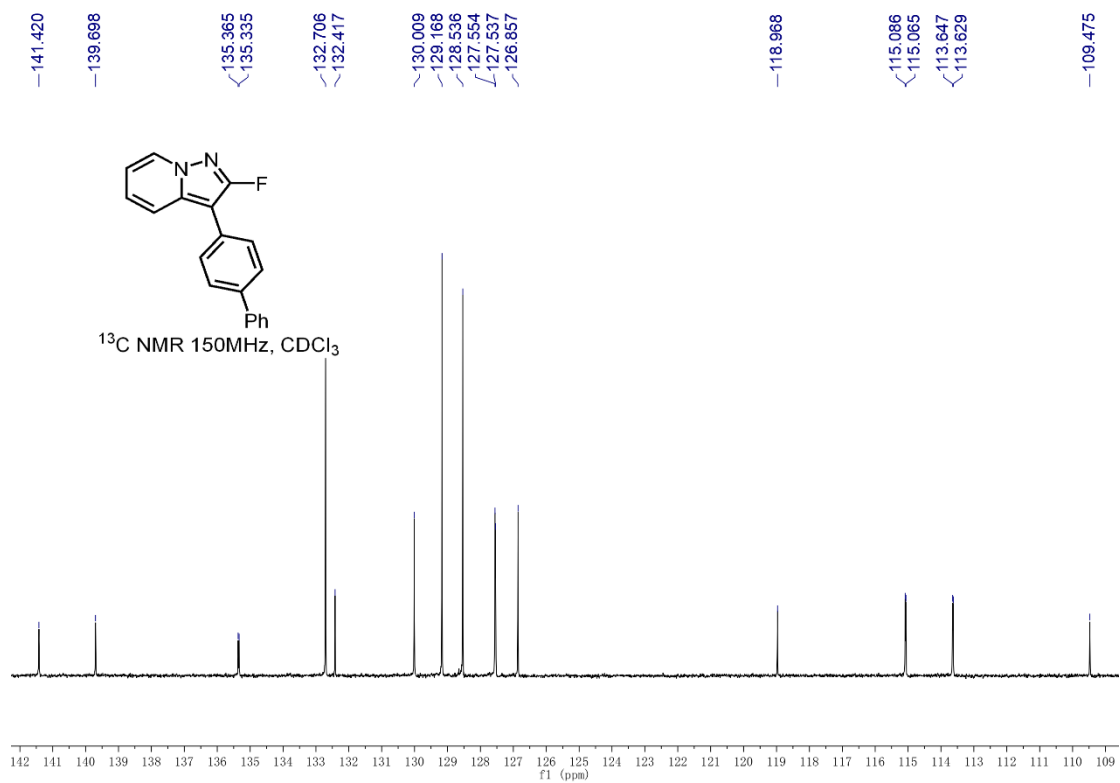

HRMS (ESI) copy of compound **4f**:

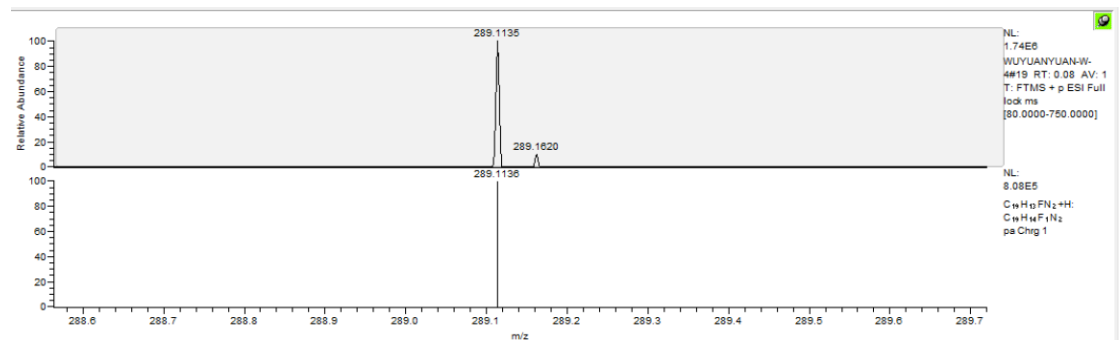



HRMS (ESI) copy of compound **4g**:

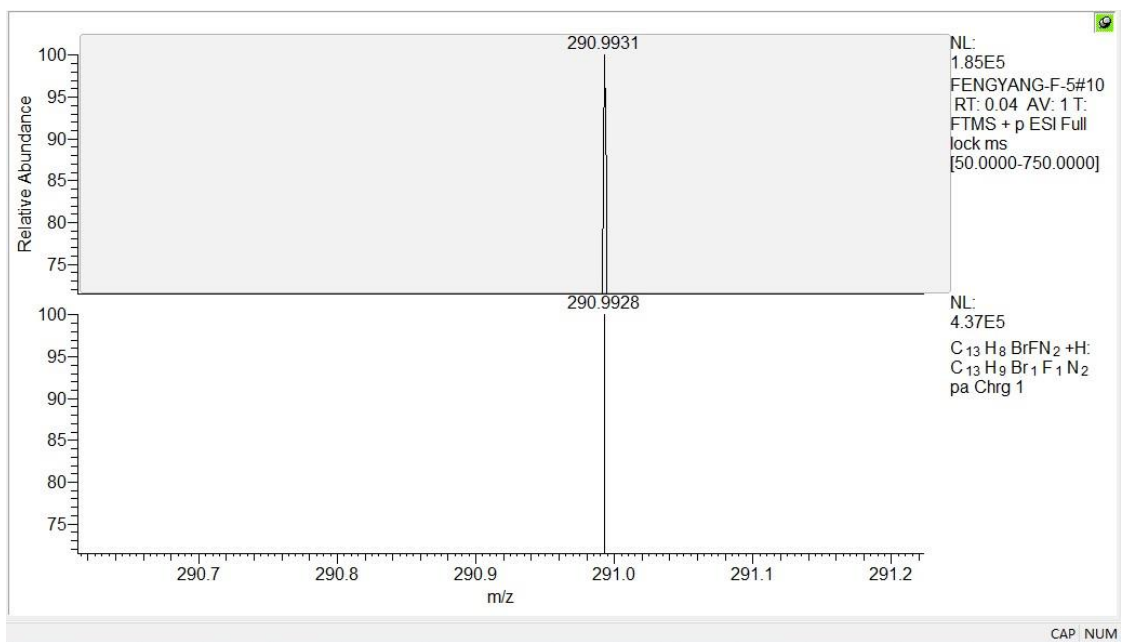

NMR copies of compound **4h**:

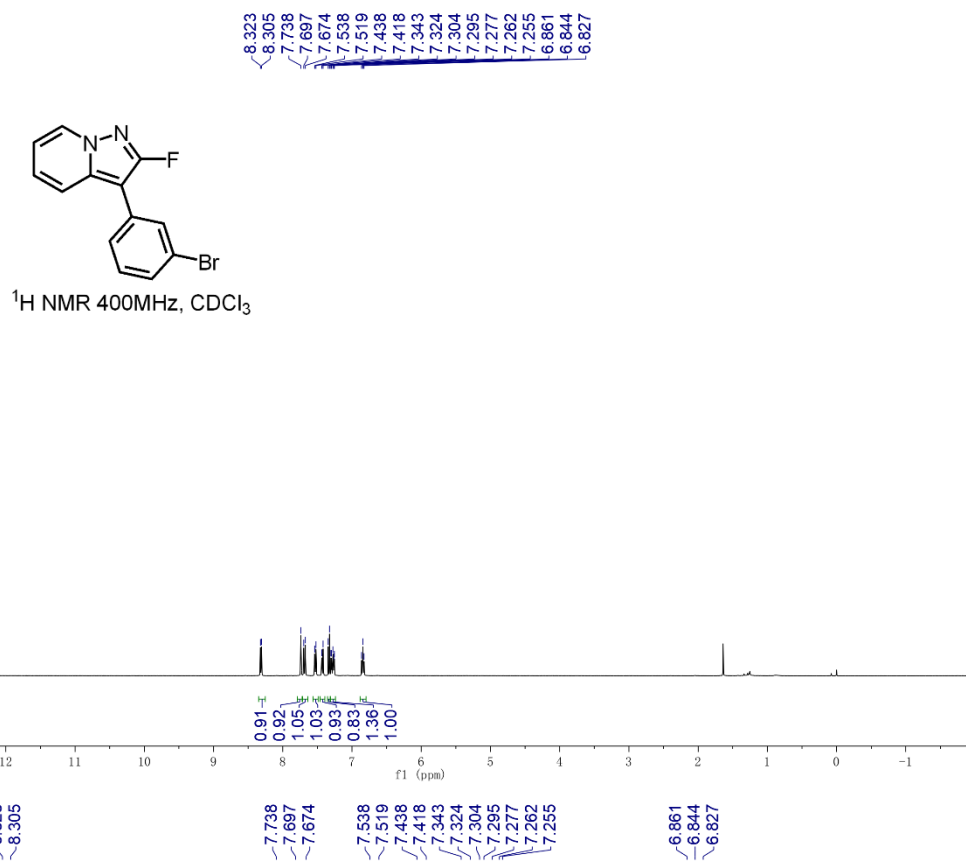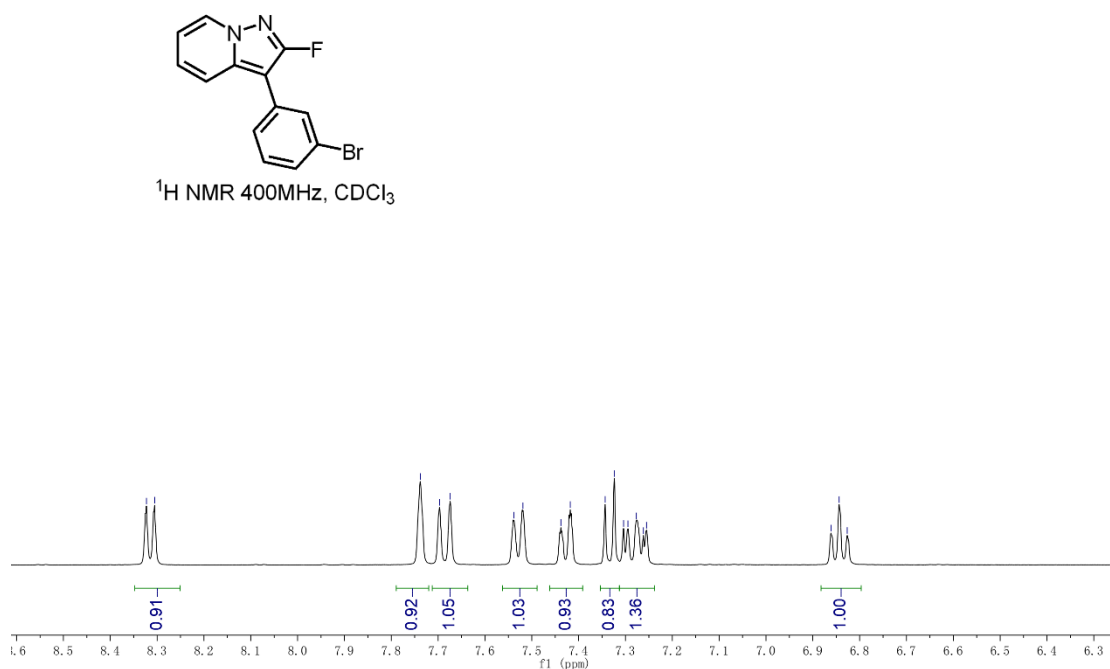

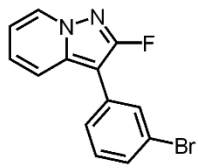

<sup>19</sup>F NMR 376MHz, CDCl<sub>3</sub>

-129.380

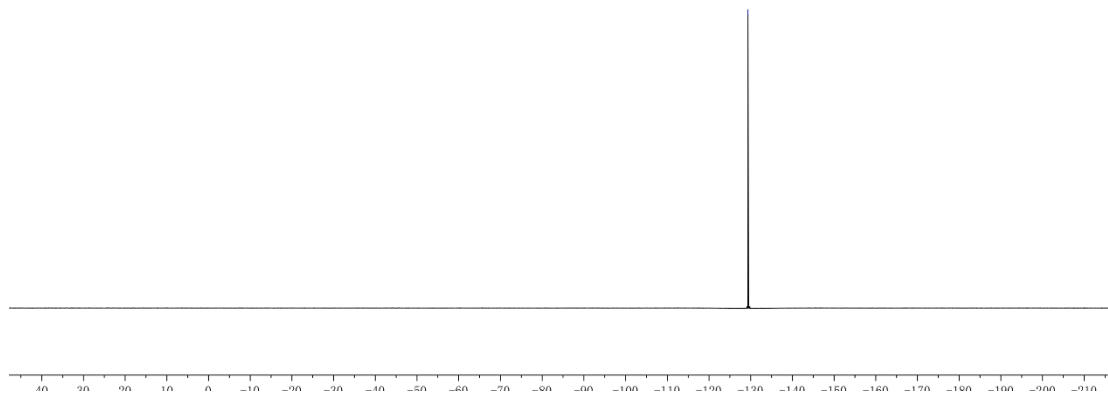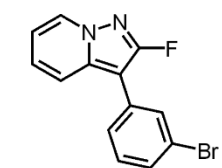

<sup>13</sup>C NMR 150MHz, CDCl<sub>3</sub>

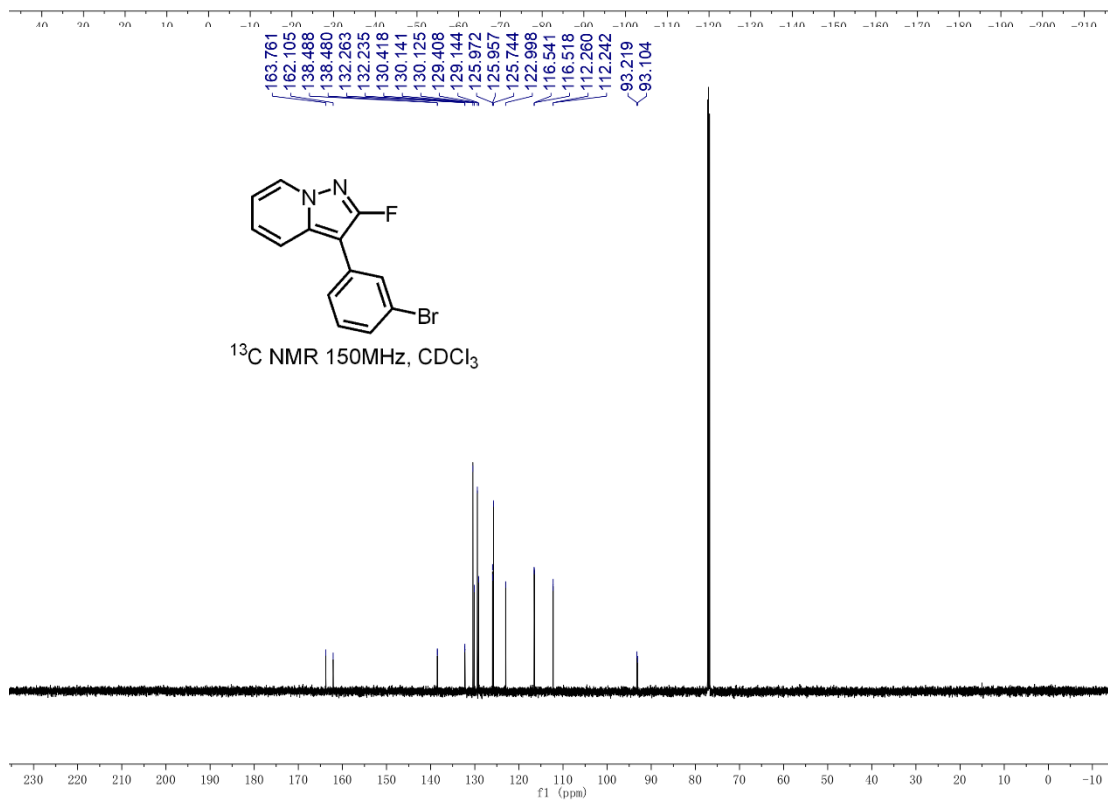

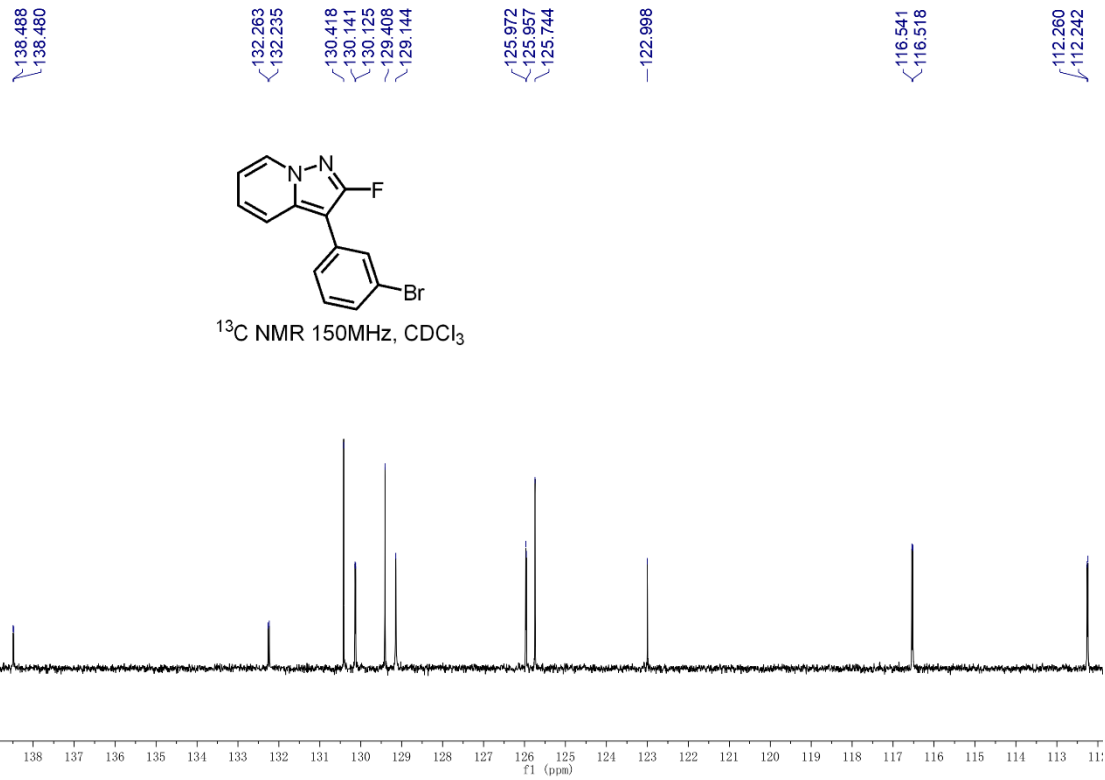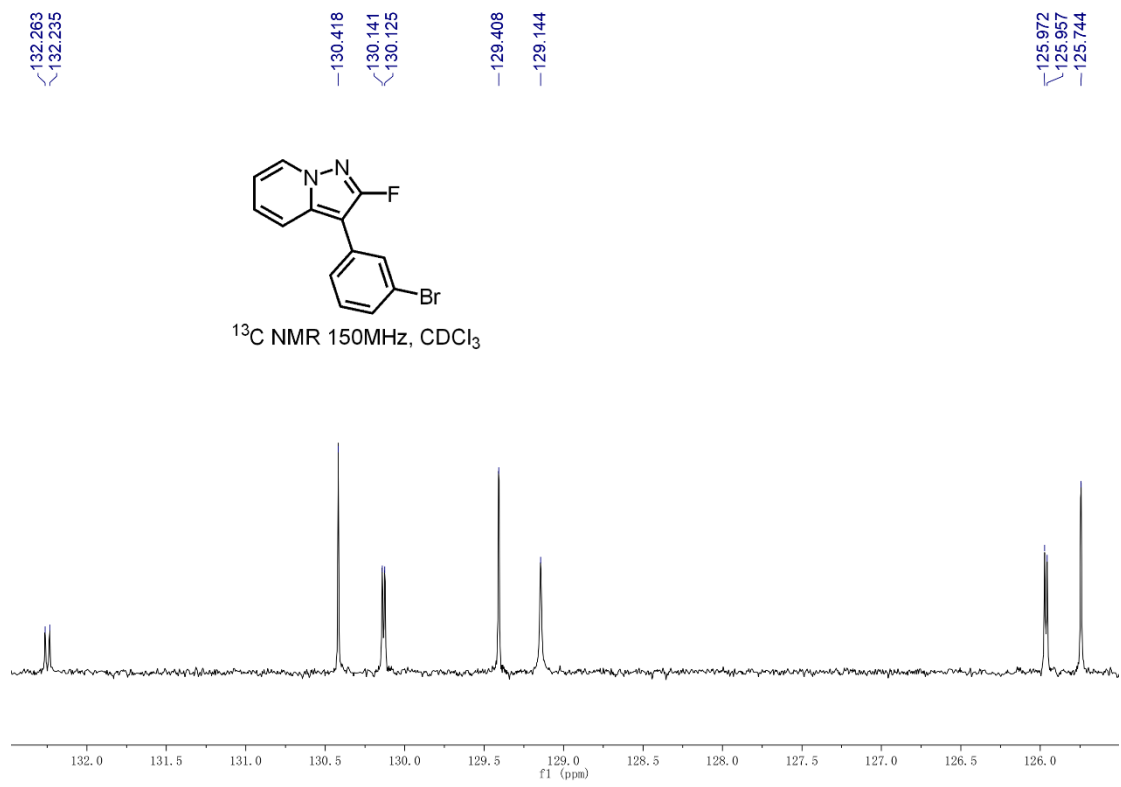

# HRMS (ESI) copy of compound 4h:

FENGYANG-F-2#215-281 RT: 0.50-0.65 AV: 67 NL: 5.21E7  
 T: FTMS + p ESI Full ms [50.0000-750.0000]

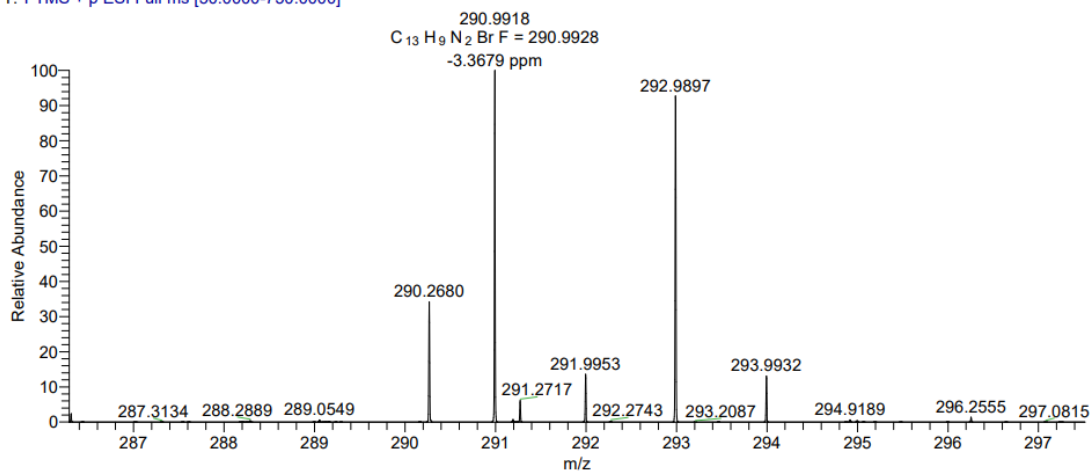

FENGYANG-F-2#215-281 RT: 0.50-0.65 AV: 67  
 T: FTMS + p ESI Full ms [50.0000-750.0000]  
 m/z = 289.3336-300.5581

| m/z      | Intensity  | Relative | Theo. Mass | Delta (ppm) | Composition                                        |
|----------|------------|----------|------------|-------------|----------------------------------------------------|
| 290.2680 | 17796842.0 | 34.18    |            |             |                                                    |
| 290.9918 | 52073392.0 | 100.00   | 290.9928   | -0.98       | C <sub>13</sub> H <sub>9</sub> N <sub>2</sub> Br F |
| 291.9953 | 7154697.5  | 13.74    |            |             |                                                    |
| 292.9897 | 49834656.0 | 95.70    |            |             |                                                    |

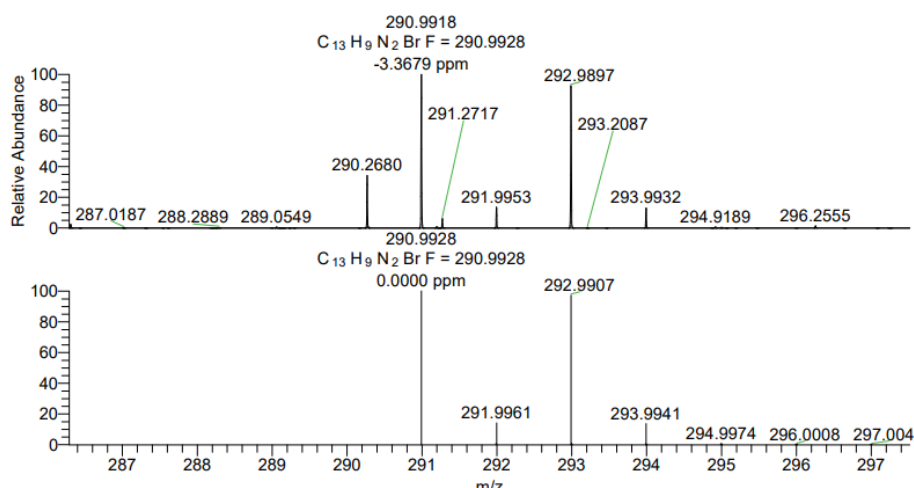

NL: 5.21E7  
 FENGYANG-F-2#215-281 RT: 0.50-0.65 AV: 67 T: FTMS + p ESI Full ms [50.0000-750.0000]

NL: 4.37E5  
 C<sub>13</sub> H<sub>9</sub> FN<sub>2</sub> Br:  
 C<sub>13</sub> H<sub>9</sub> F<sub>1</sub> N<sub>2</sub> Br<sub>1</sub> pa Chrg 1

NMR copies of compound **4i**:

8.318  
8.299  
7.662  
7.640  
7.588  
7.568  
7.476  
7.455  
7.274  
7.256  
7.235  
6.846  
6.829  
6.812

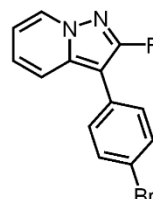

<sup>1</sup>H NMR 400 MHz, CDCl<sub>3</sub>

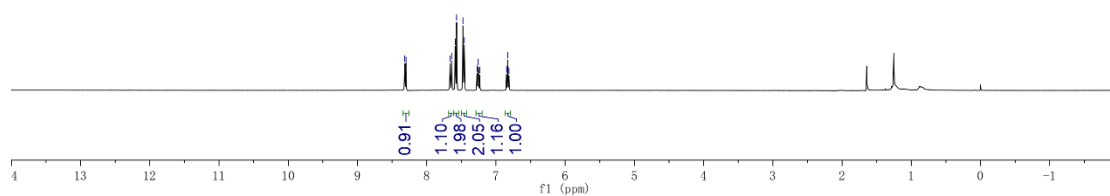

8.318  
8.299

7.662  
7.640  
7.588  
7.568

7.476  
7.455

7.274  
7.256  
7.235

6.846  
6.829  
6.812

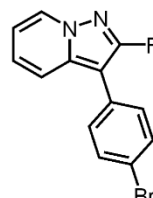

<sup>1</sup>H NMR 400 MHz, CDCl<sub>3</sub>

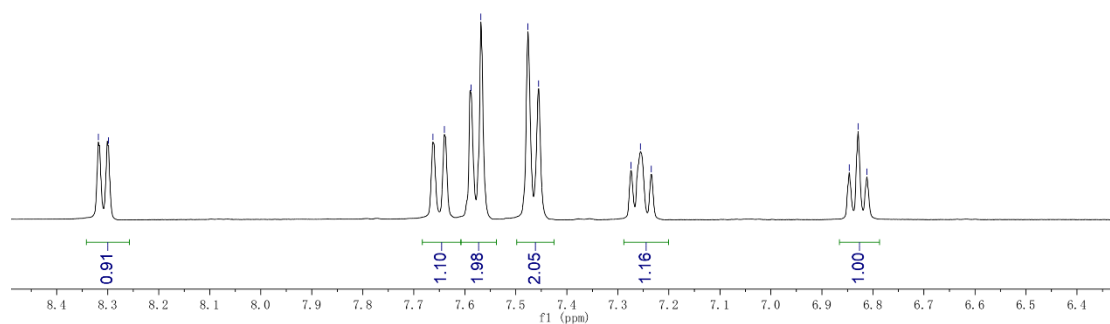

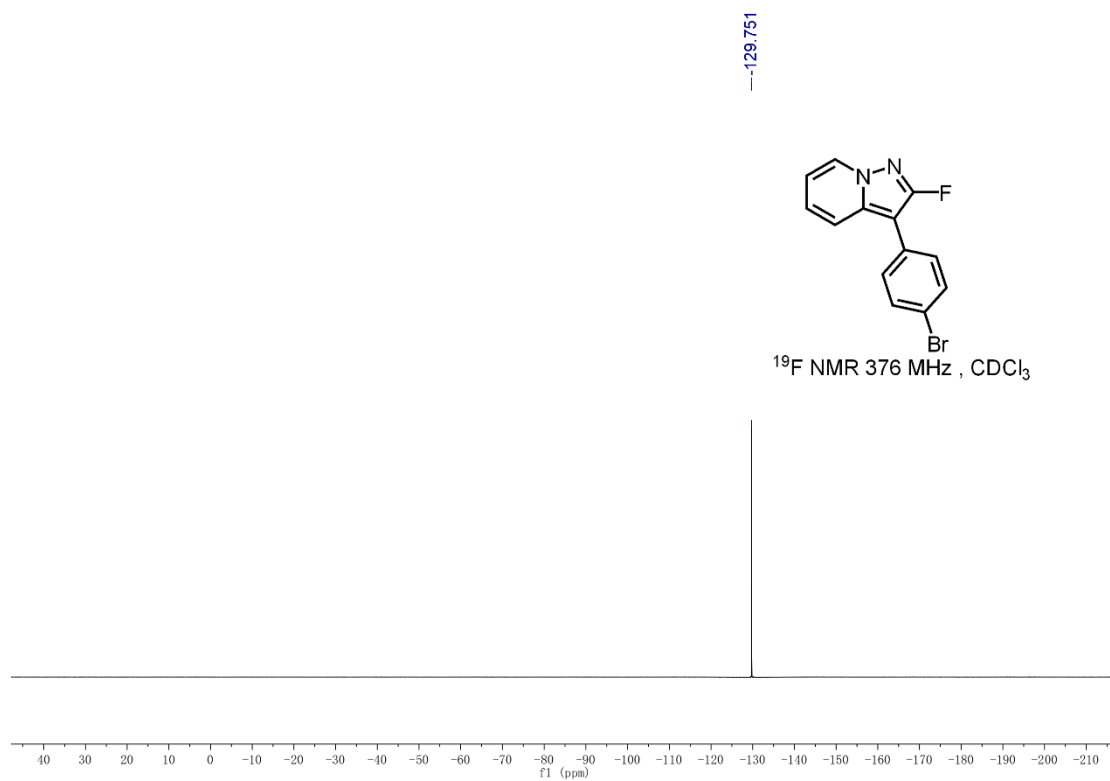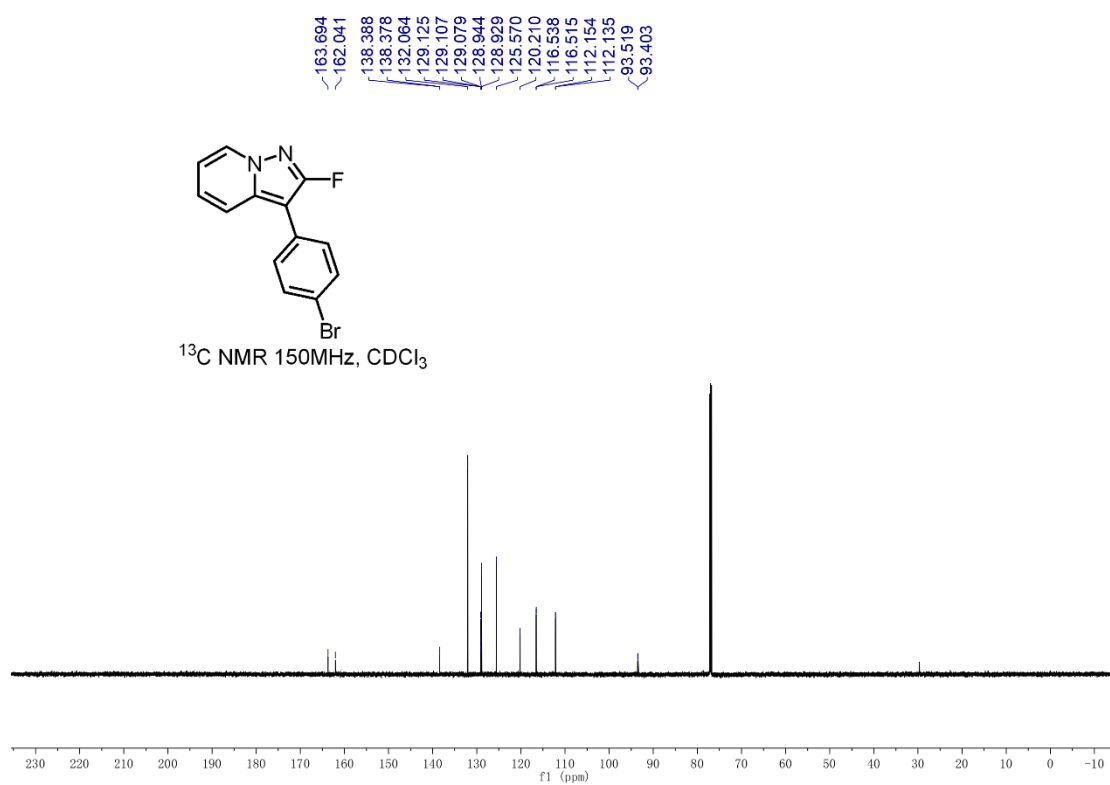

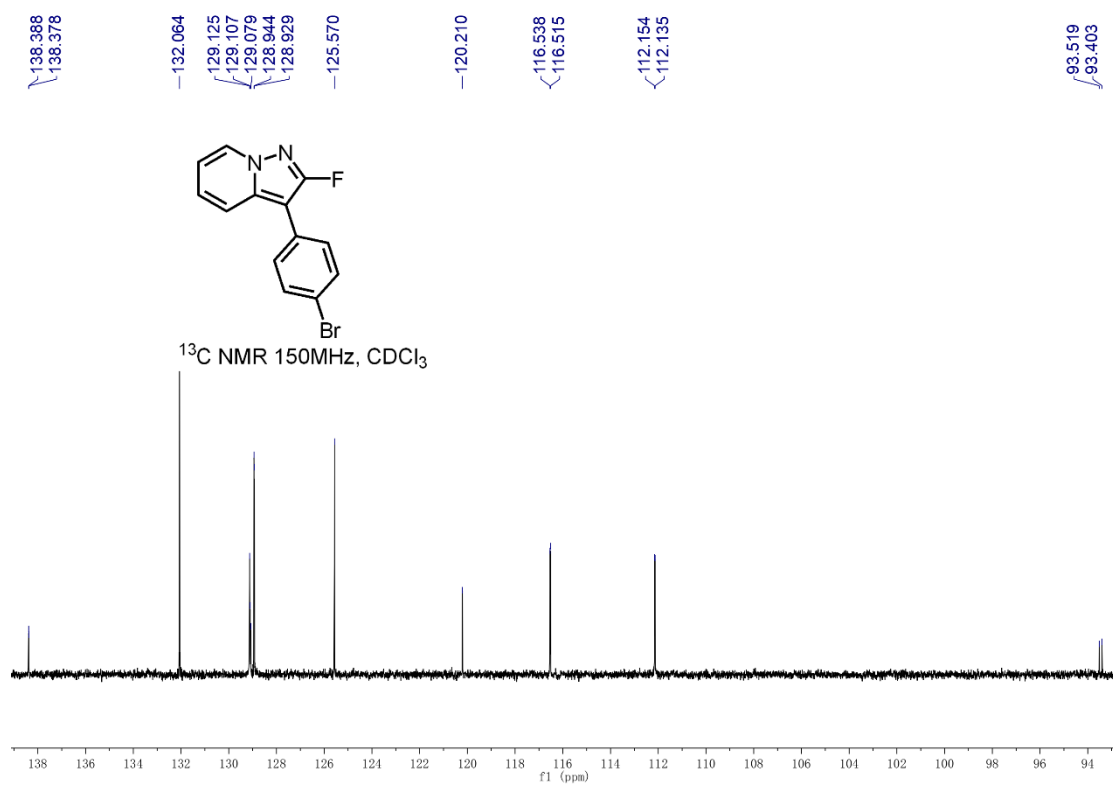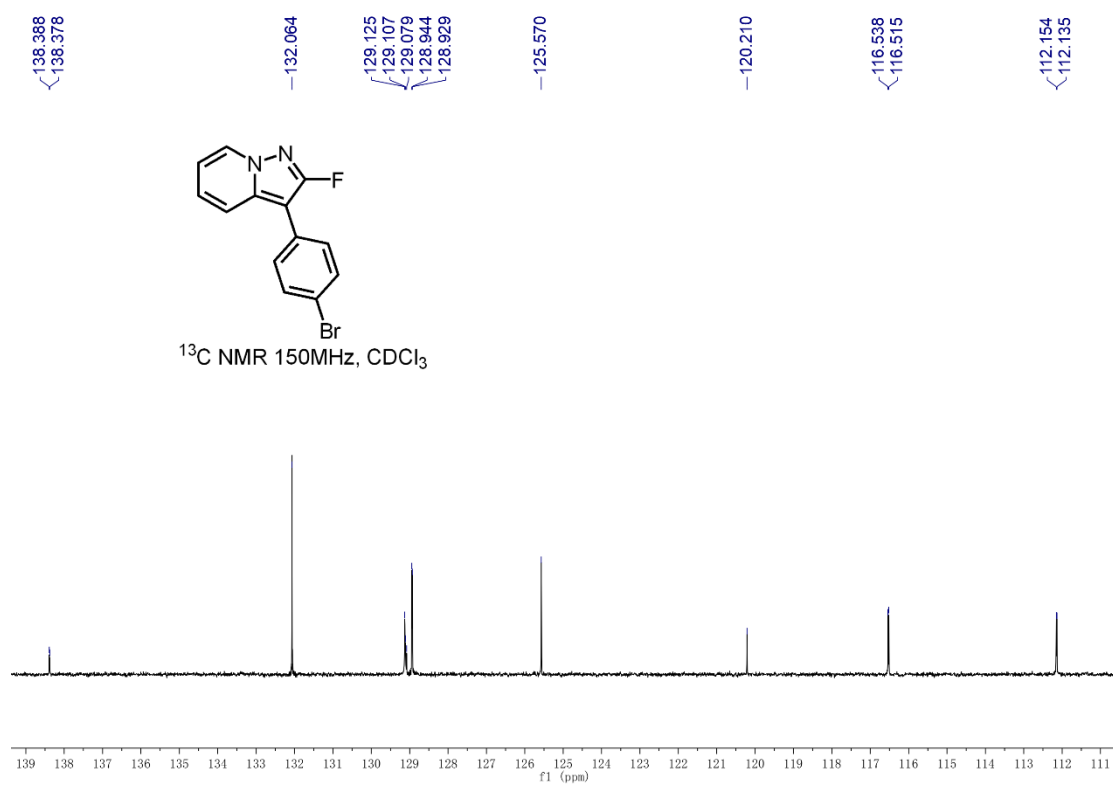



# HRMS (ESI) copy of compound 4i:

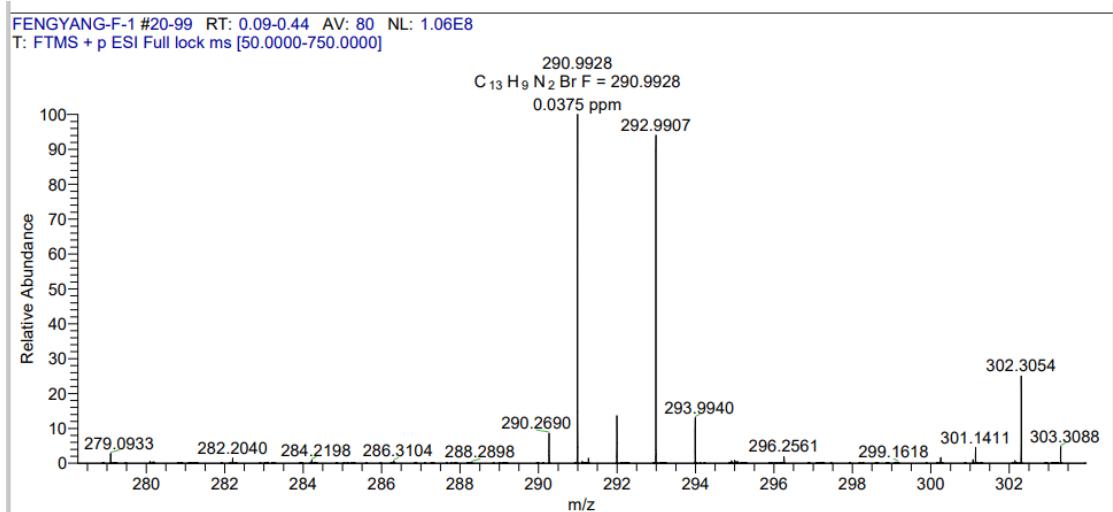

FENGYANG-F-1#20-99 RT: 0.09-0.44 AV: 80  
T: FTMS + p ESI Full lock ms [50.0000-750.0000]  
m/z = 278.2546-303.9316

| m/z      | Intensity   | Relative | Theo. Mass | Delta (ppm) | Composition                                       |
|----------|-------------|----------|------------|-------------|---------------------------------------------------|
| 290.9928 | 106855304.0 | 100.00   | 290.9928   | 0.01        | C <sub>13</sub> H <sub>9</sub> N <sub>2</sub> BrF |
| 291.9961 | 14480088.0  | 13.55    |            |             |                                                   |
| 292.9907 | 102131216.0 | 95.58    |            |             |                                                   |
| 302.3054 | 26627254.0  | 24.92    |            |             |                                                   |

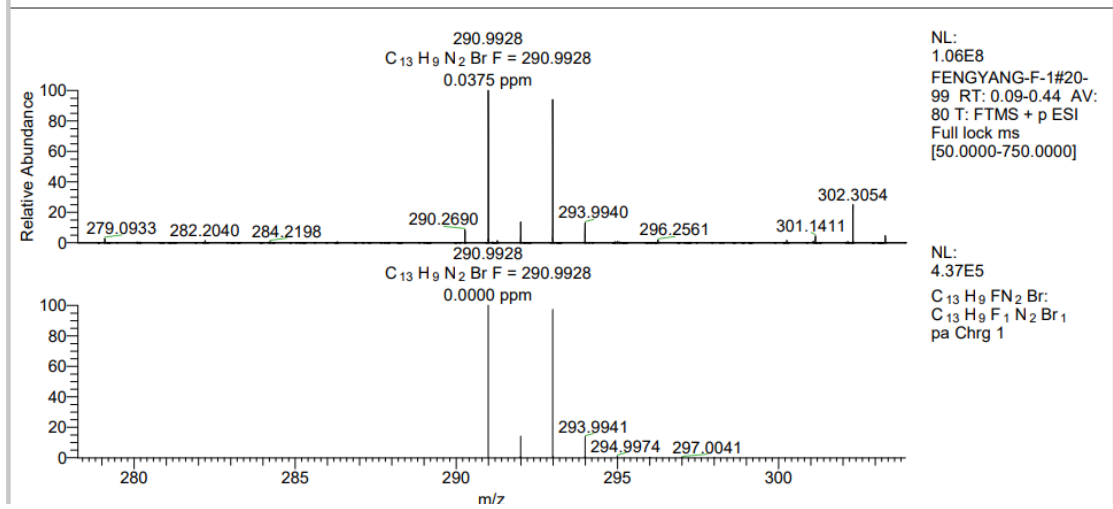

NMR copies of compound **4j**:

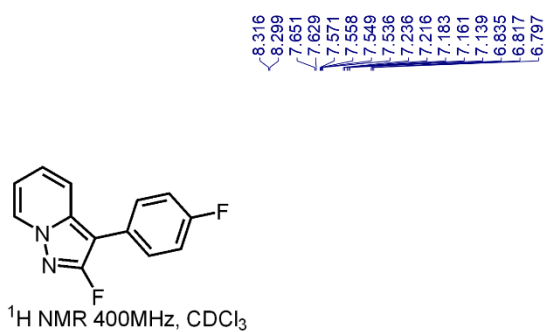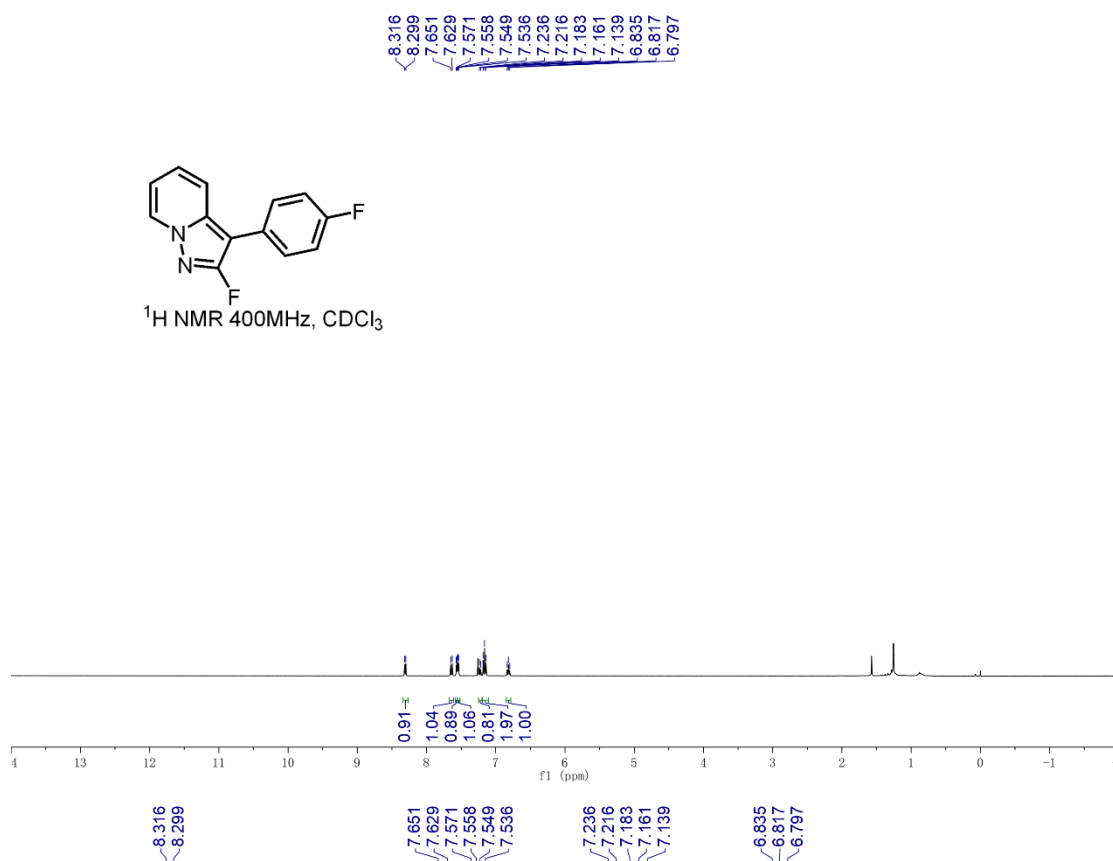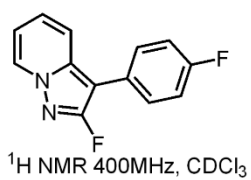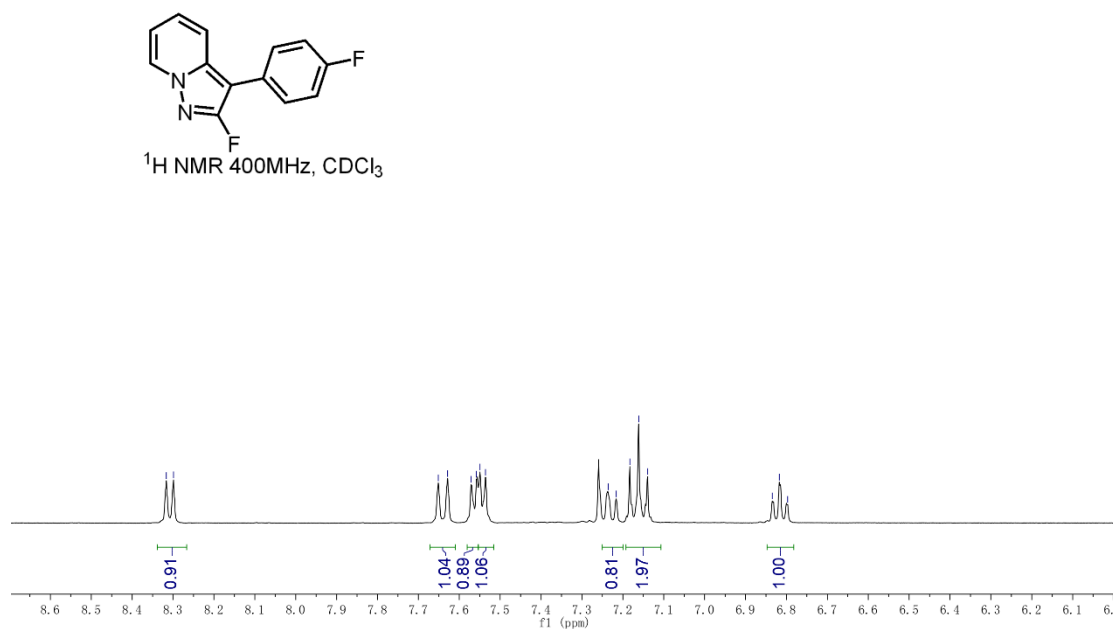

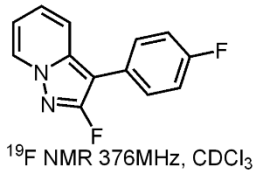

- 115.318
- 115.332
- 115.341
- 115.355
- 115.369
- 115.377
- 115.391
- 130.723

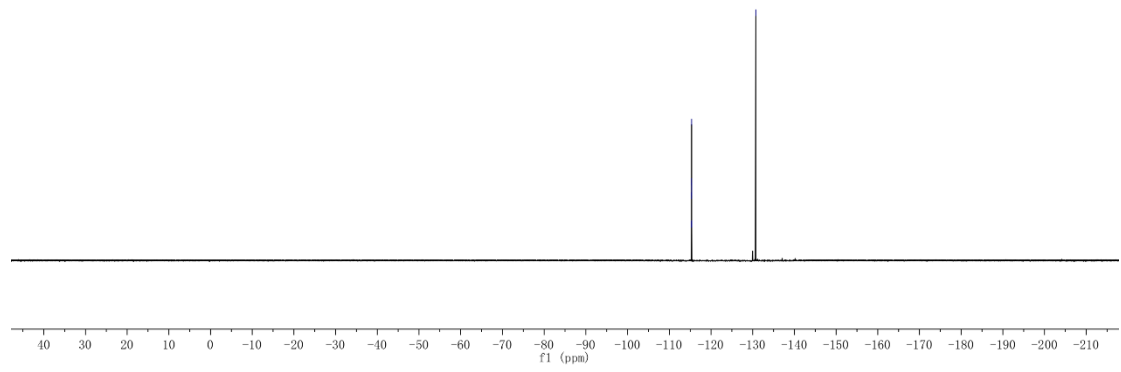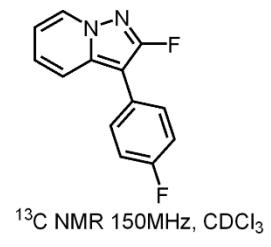

- 163.649
- 162.310
- 162.000
- 160.677
- 138.434
- 138.424
- 129.200
- 128.187
- 128.148
- 129.134
- 129.025
- 126.093
- 126.068
- 126.044
- 125.276
- 116.489
- 116.465
- 115.990
- 115.848
- 111.979
- 111.961
- 93.669
- 93.551

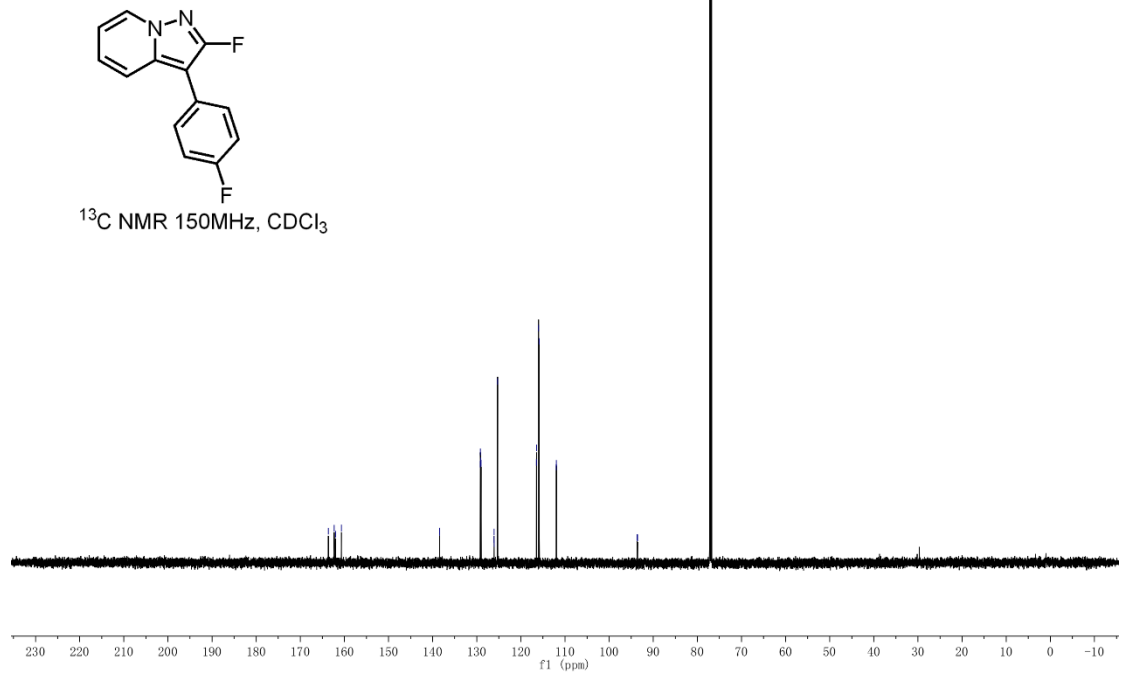

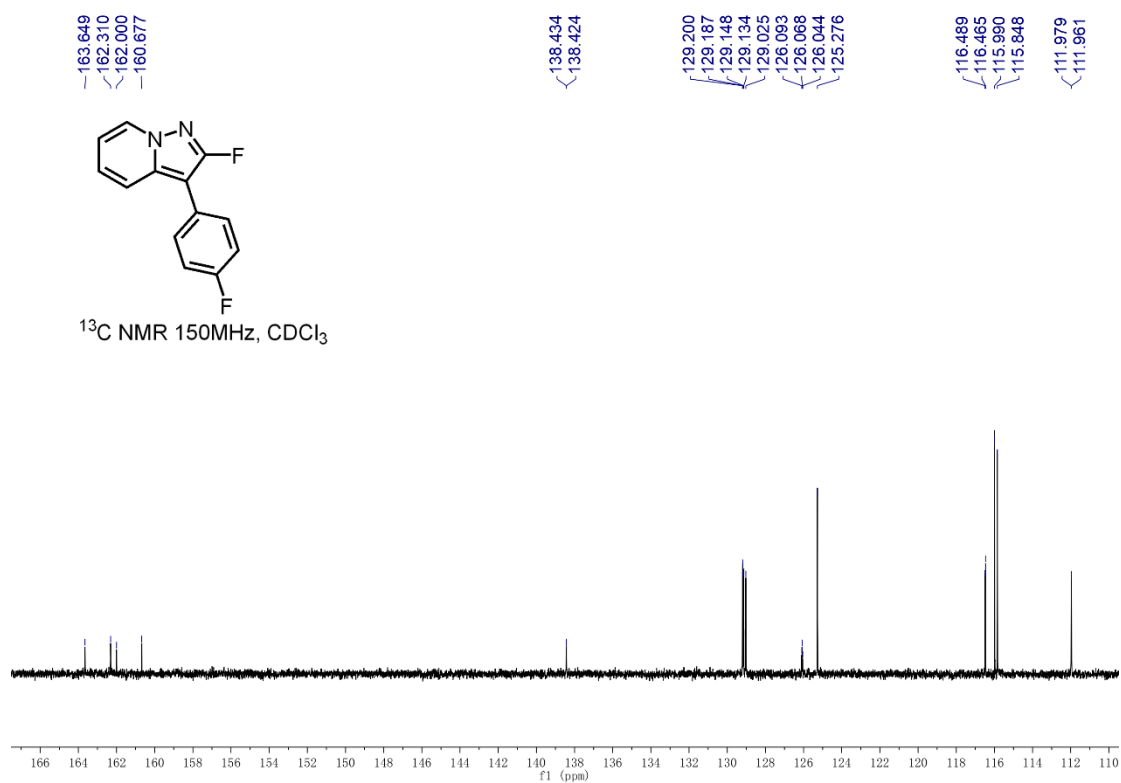

HRMS (ESI) copy of compound **4j**:

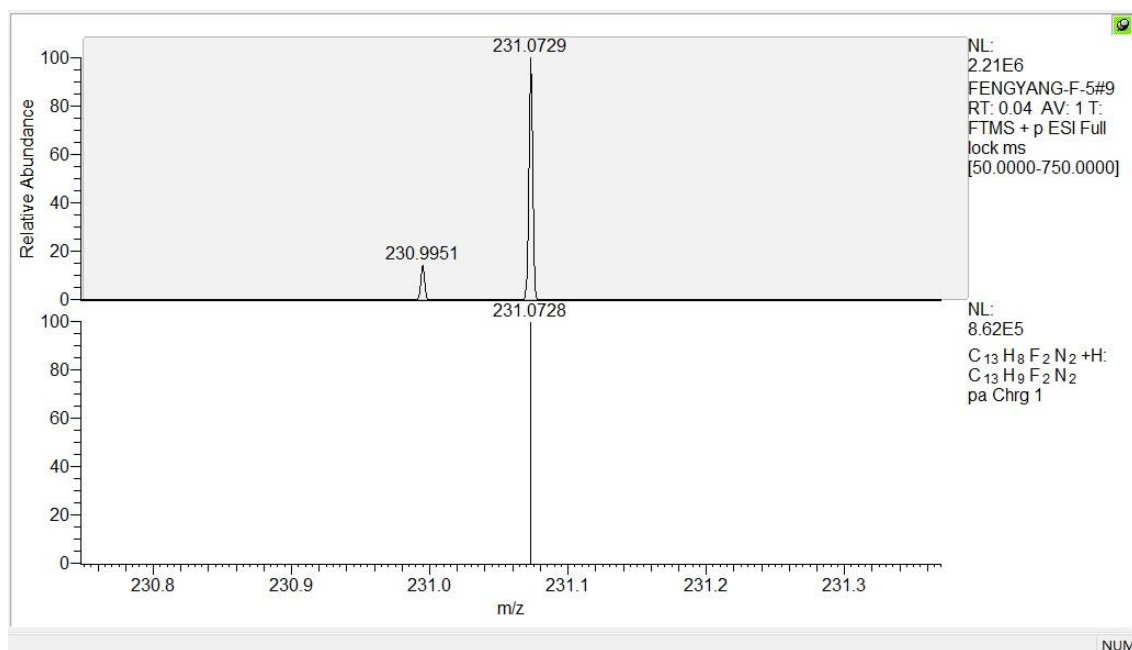

NMR copies of compound **4k**:

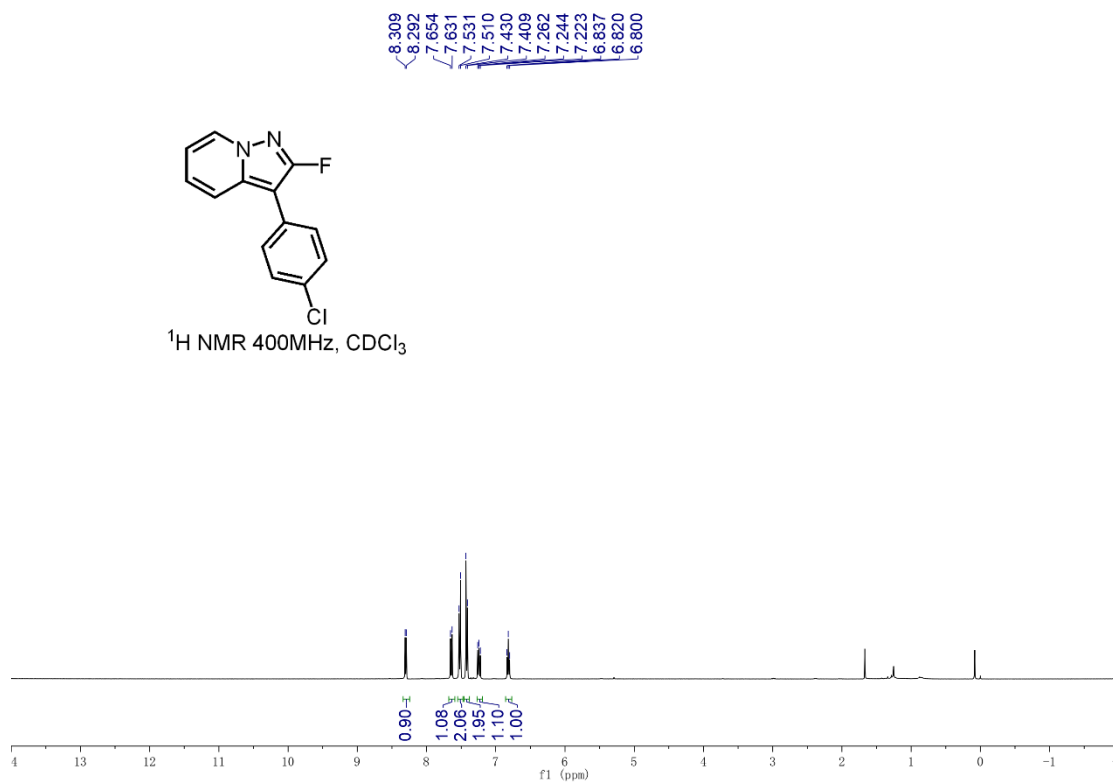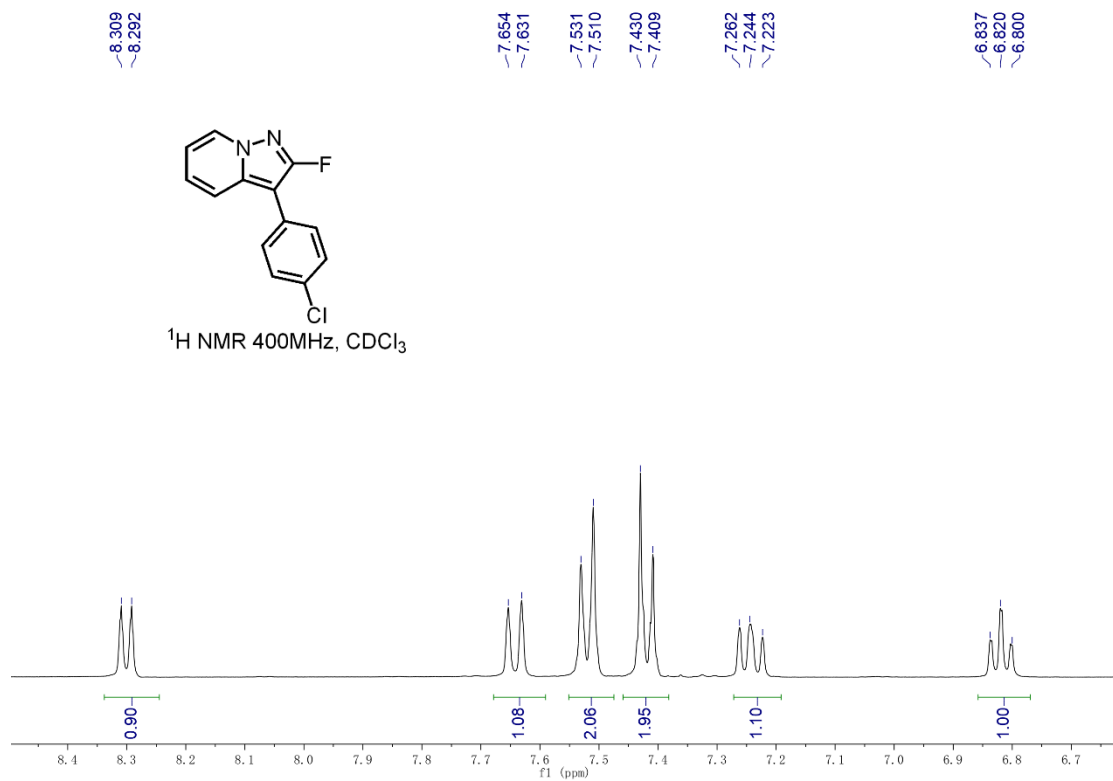

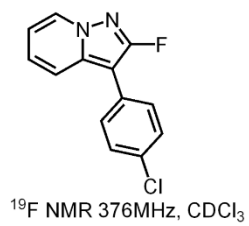

-129.879

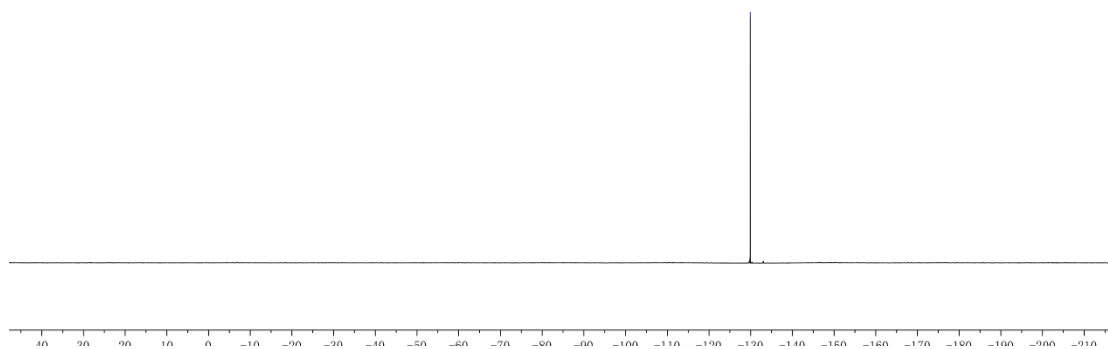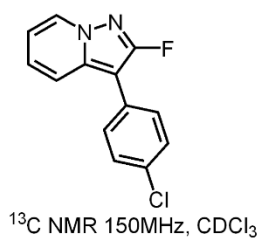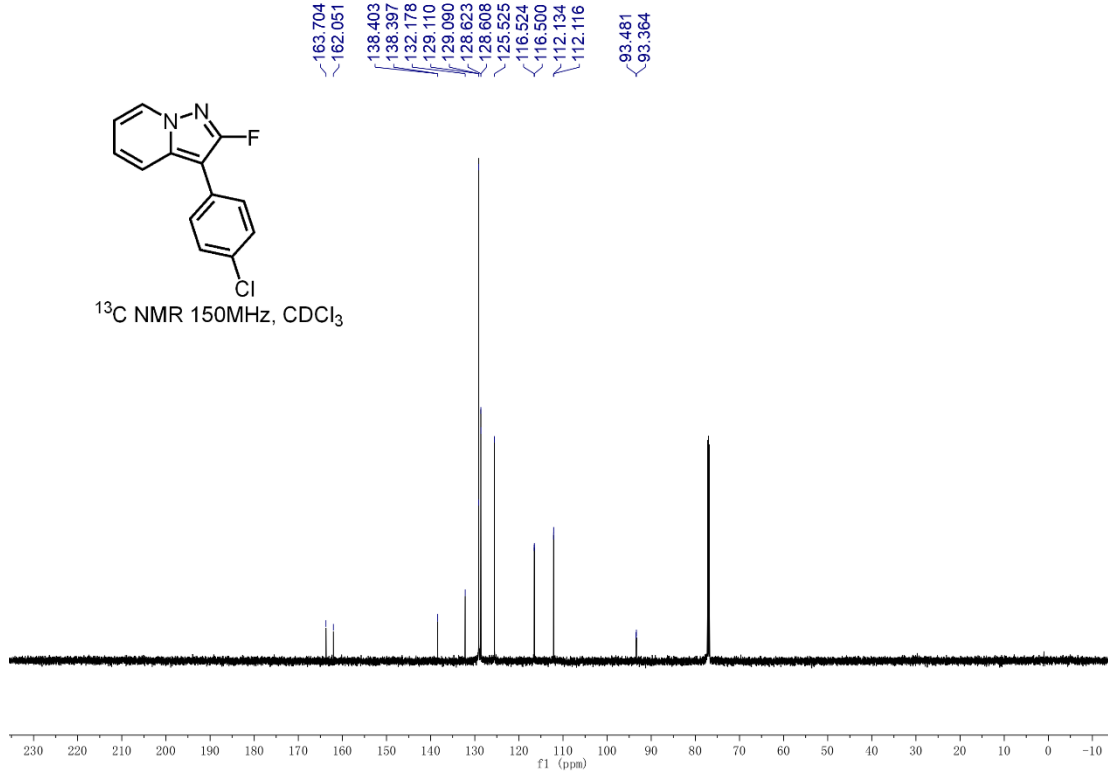

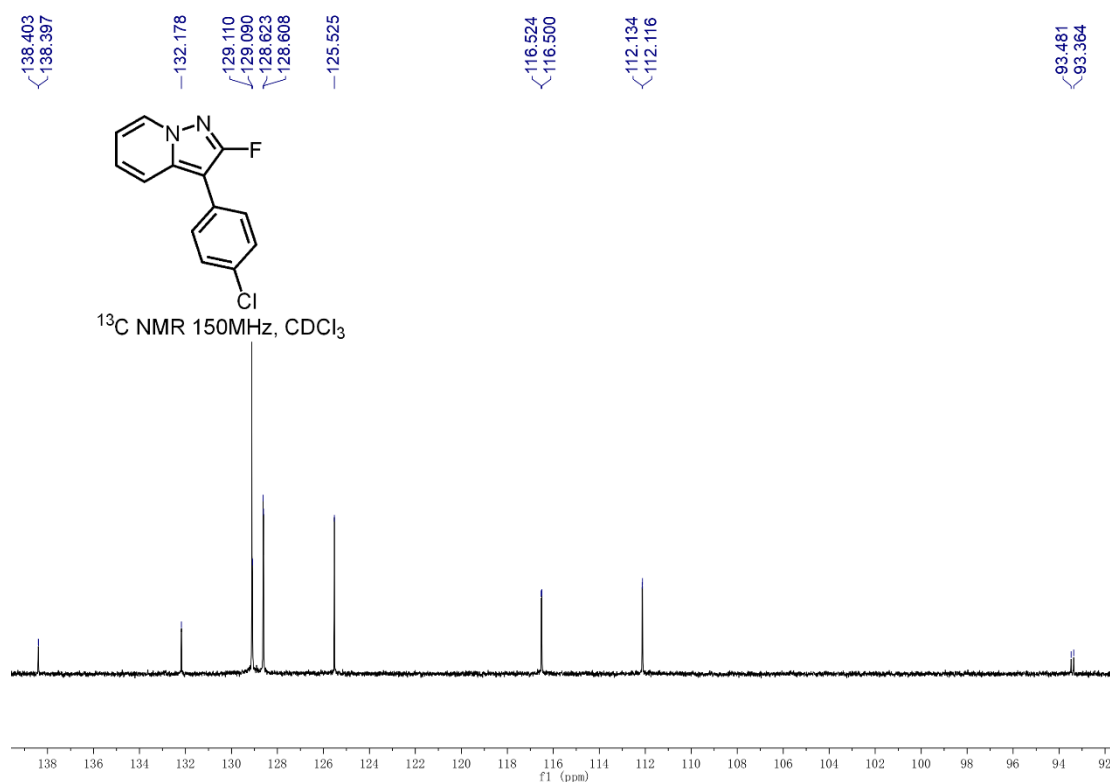

HRMS (ESI) copy of compound **4k**:

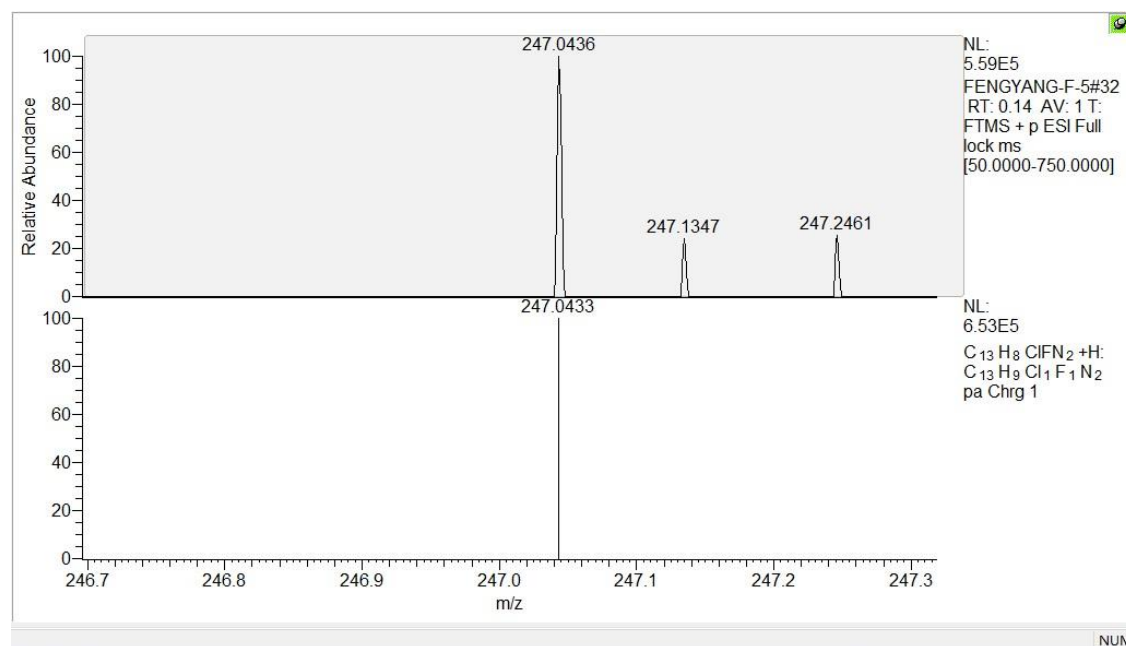

NMR copies of compound **4l**:

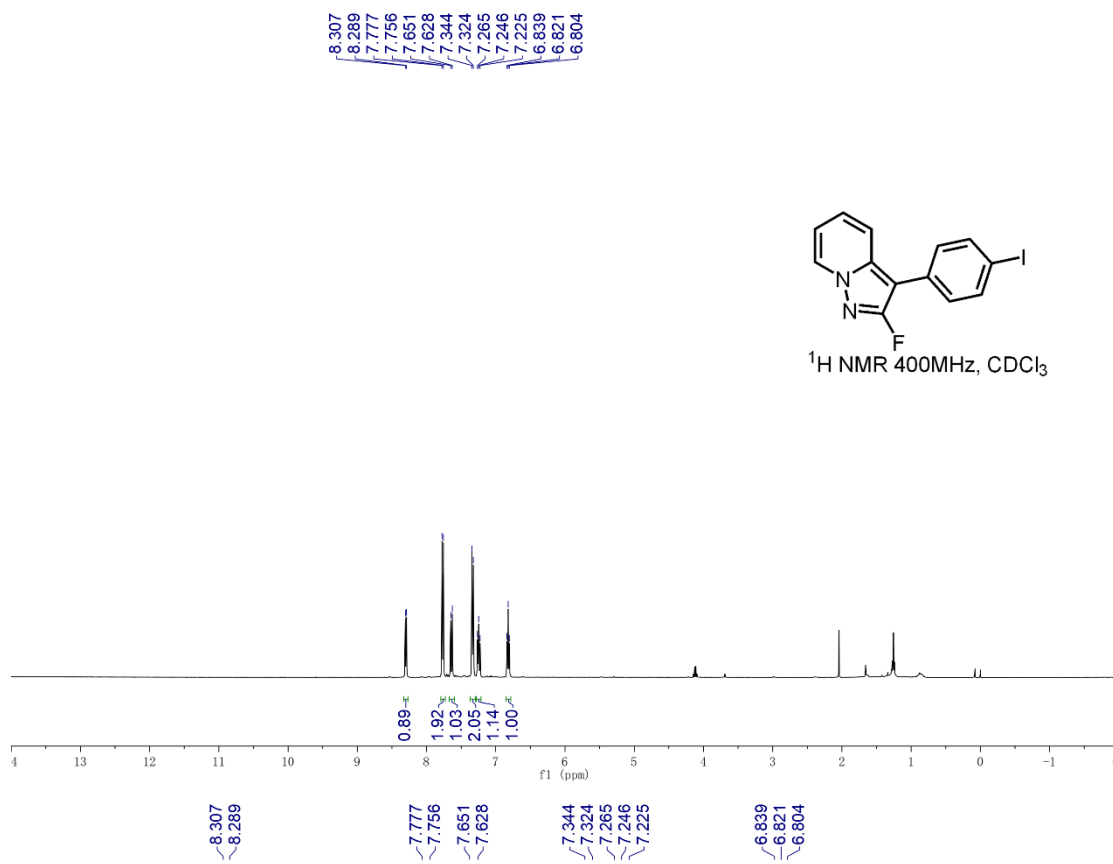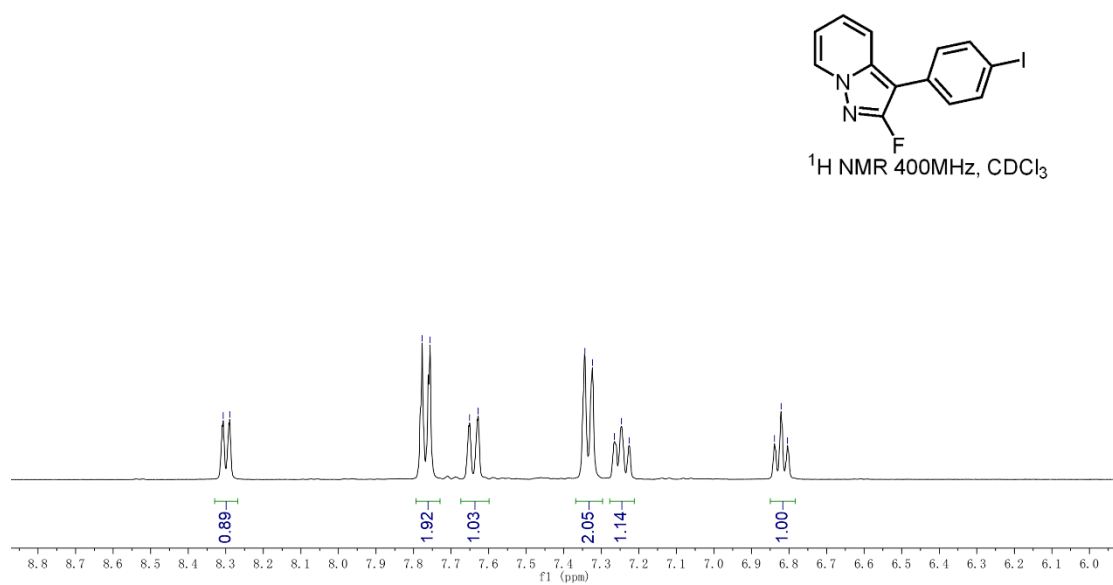



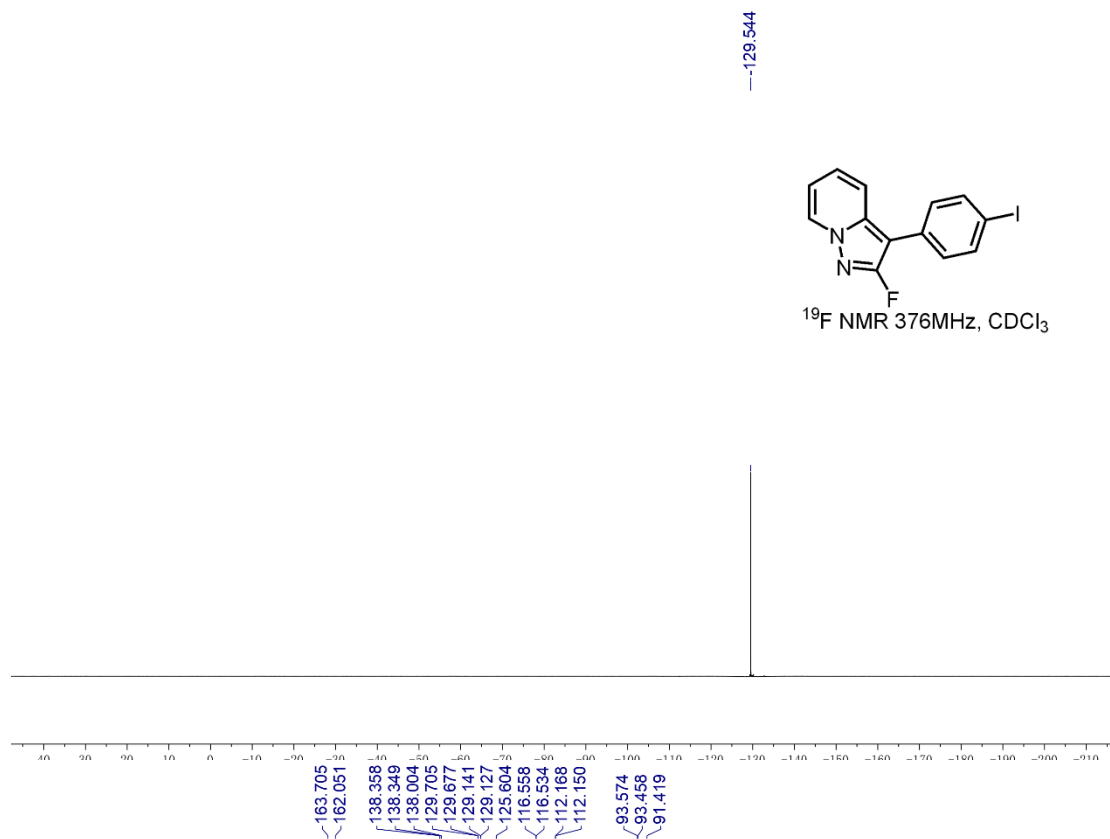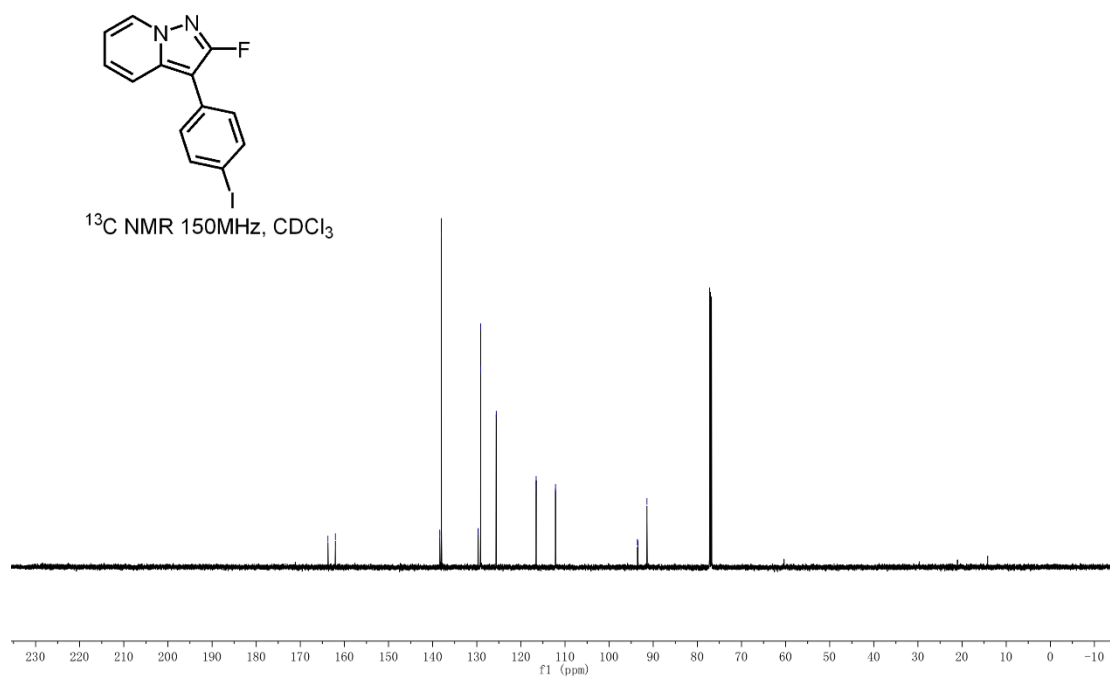

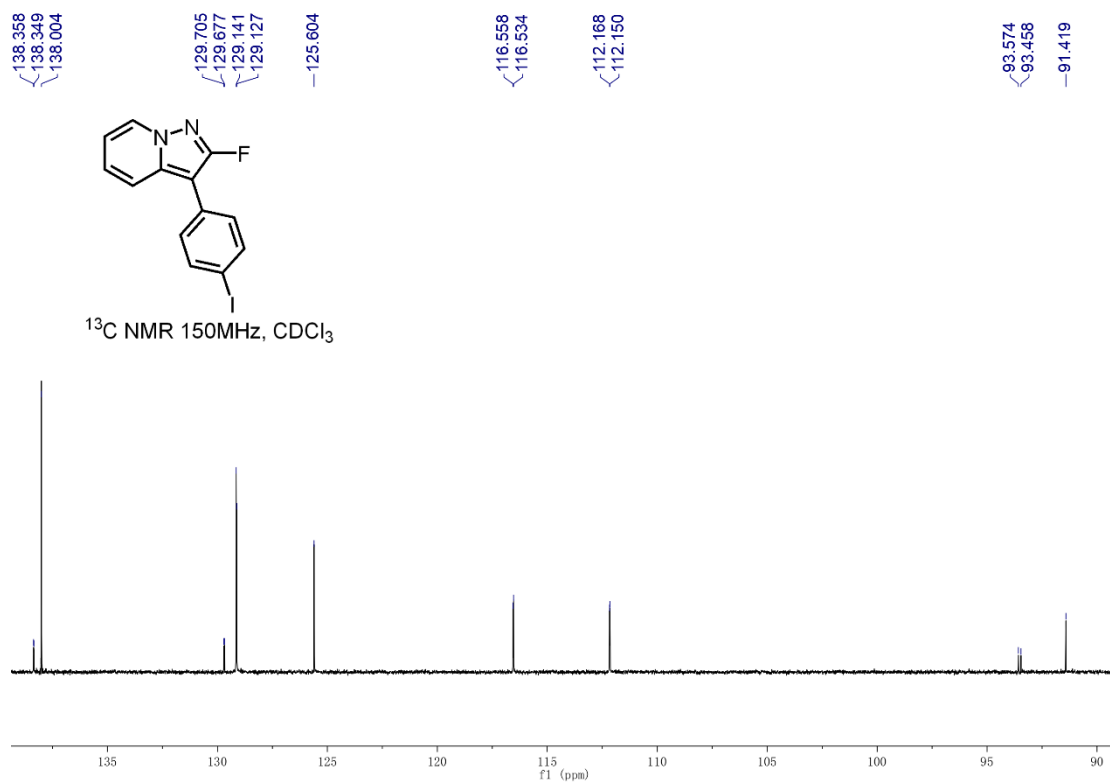

HRMS (ESI) copy of compound **4i**:

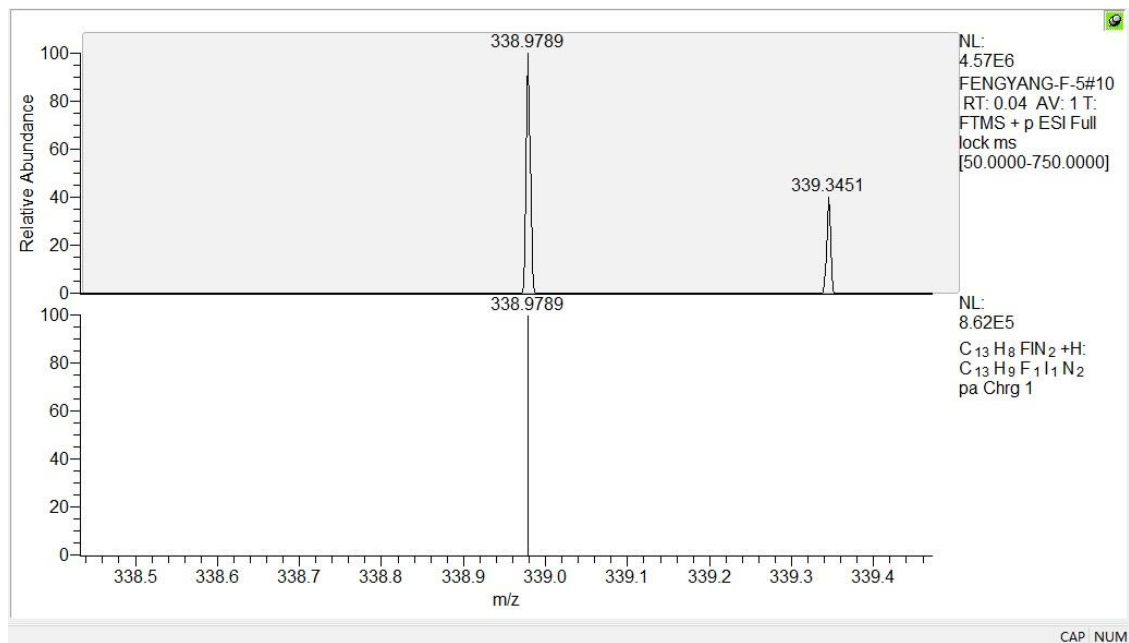

NMR copies of compound **4m**:

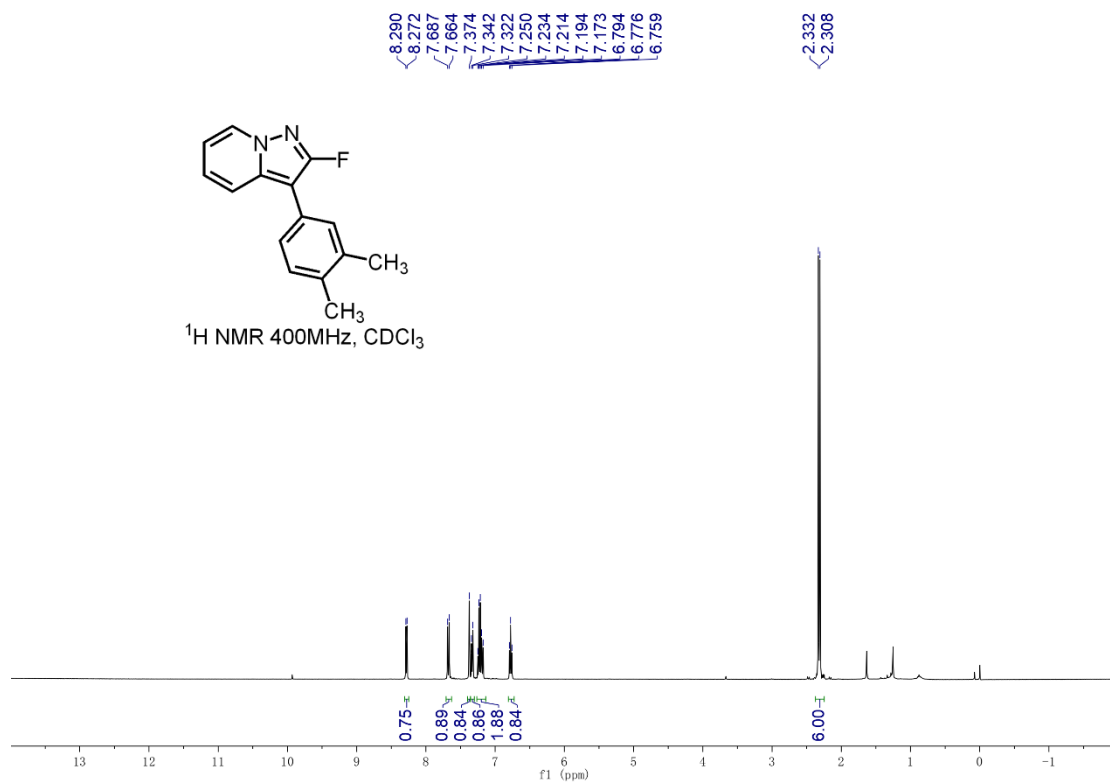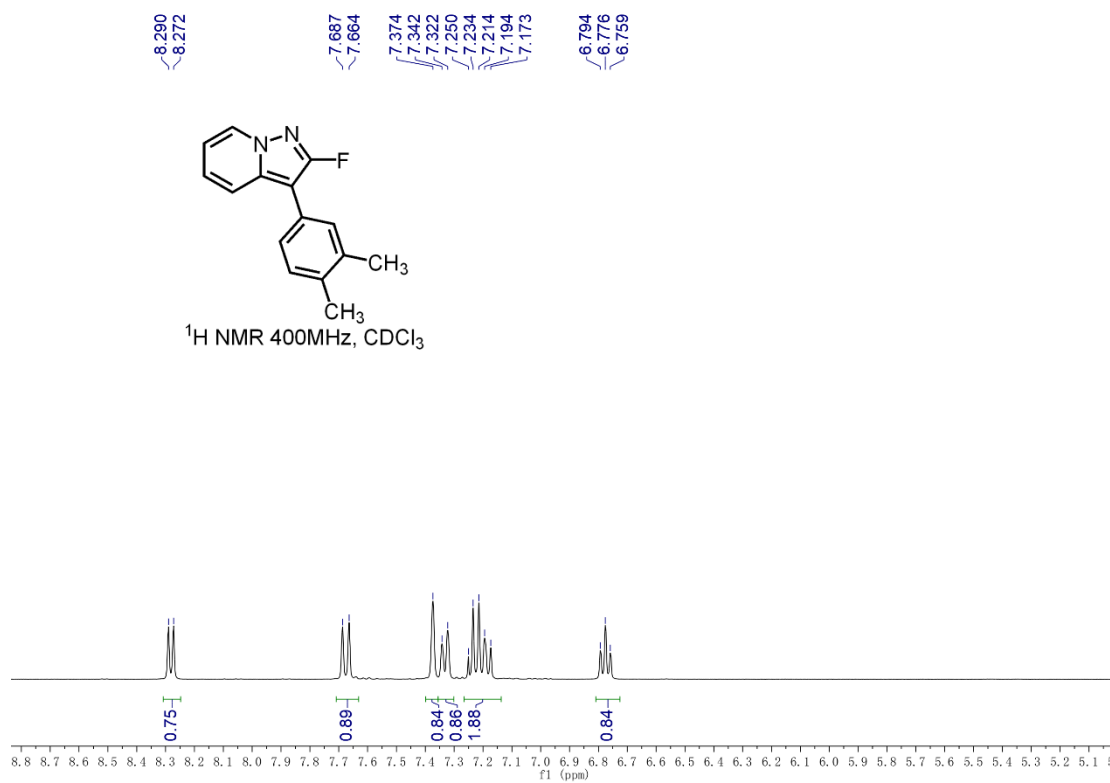

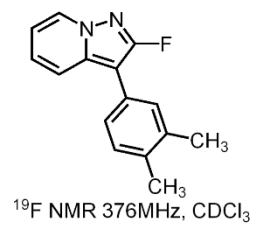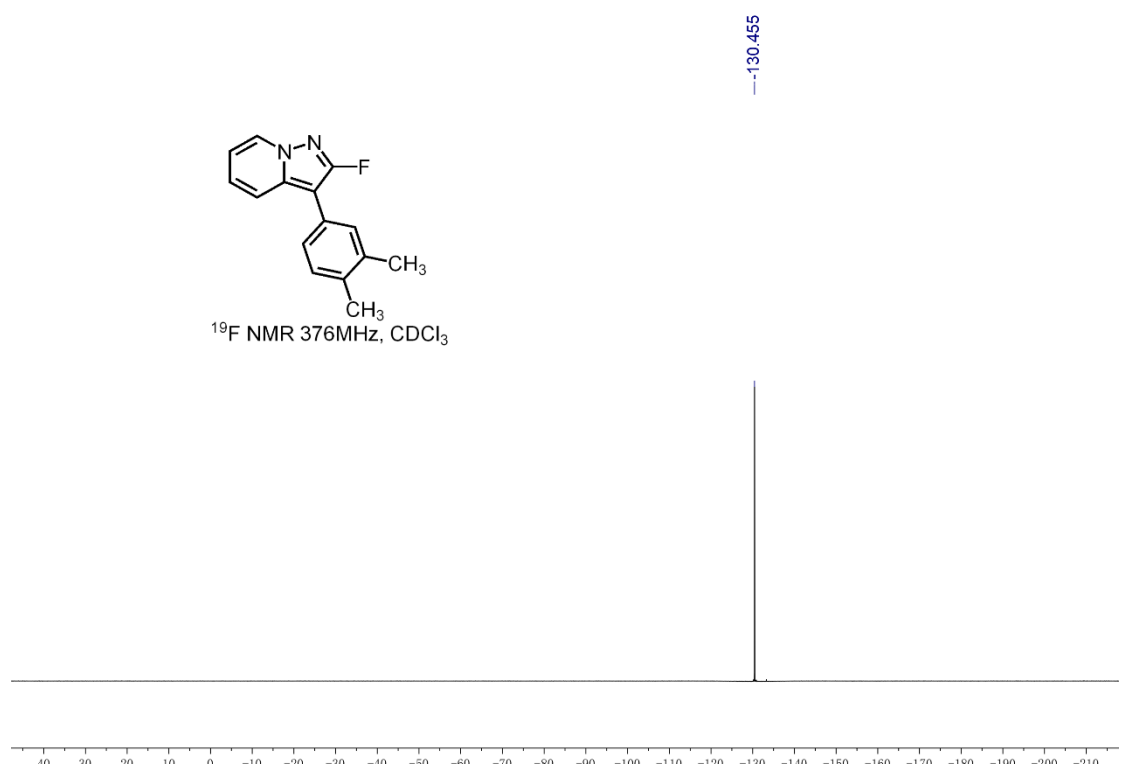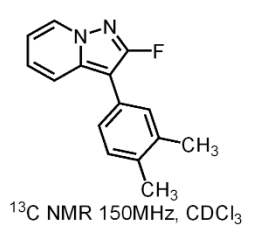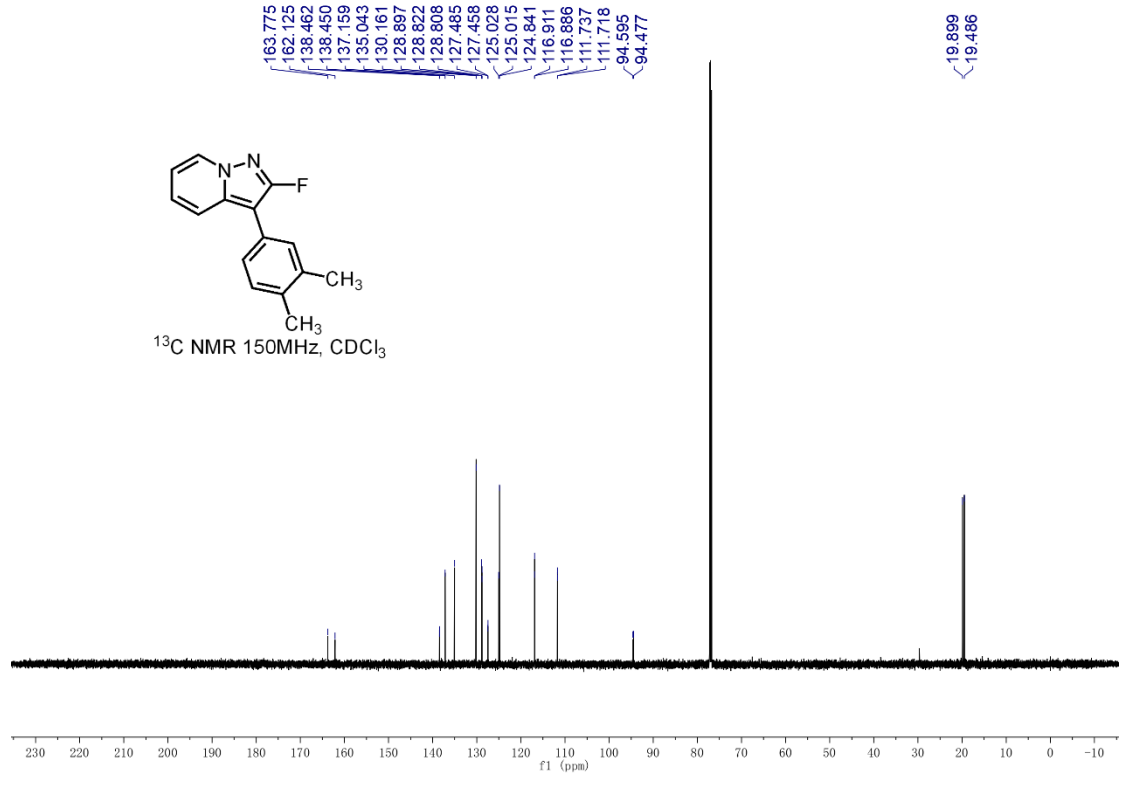

138.462  
138.450  
137.159  
—135.043

130.161  
128.897  
128.822  
128.808  
127.485  
127.458  
125.028  
125.015  
124.841

116.911  
116.886

111.737  
111.718

94.595  
94.477

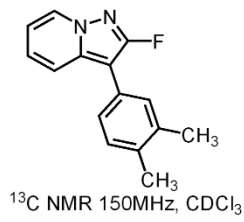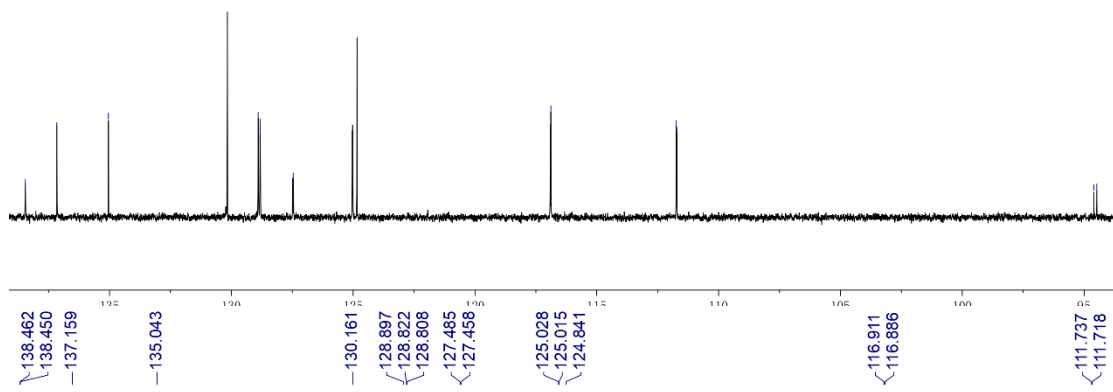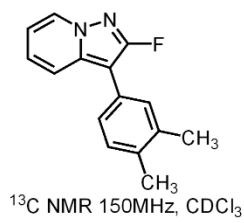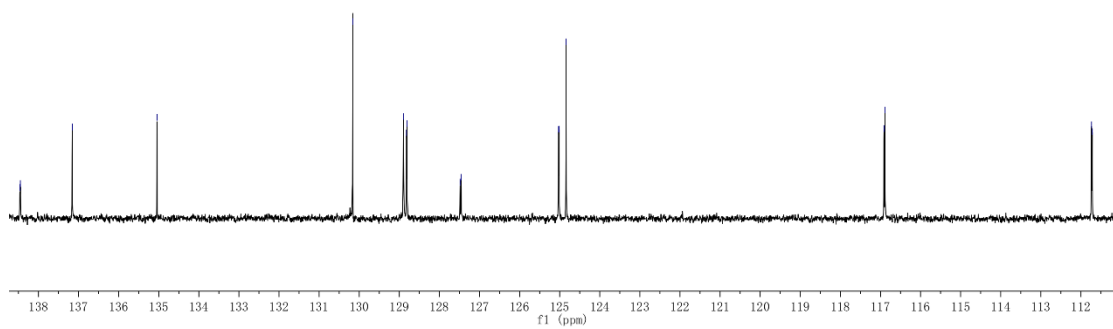

HRMS (ESI) copy of compound **4m**:

FENGYANG-F-4 #1 RT: 0.00 AV: 1 NL: 2.48E8  
T: FTMS + p ESI Full lock ms [50.0000-750.0000]

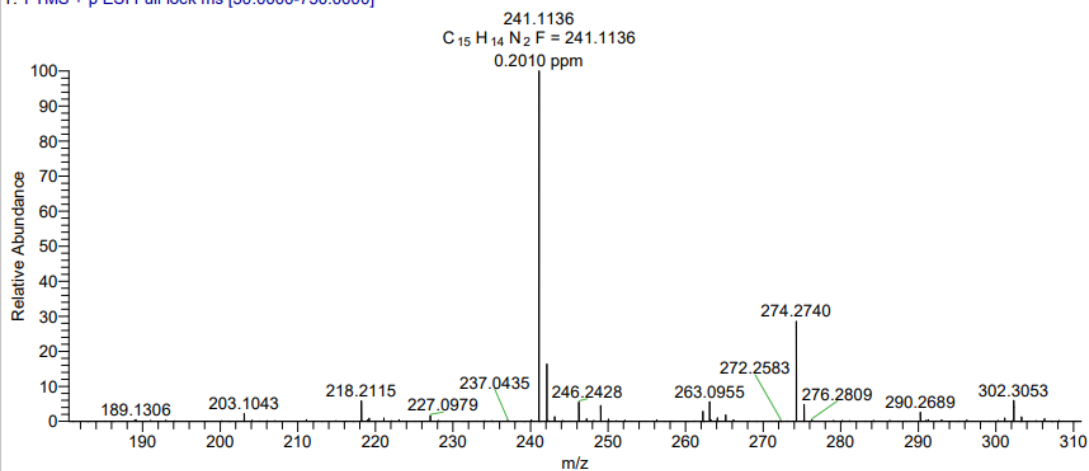

FENGYANG-F-4#1 RT: 0.00  
T: FTMS + p ESI Full lock ms [50.0000-750.0000]  
m/z = 180.4845-310.9690

| m/z      | Intensity   | Relative | Theo. Mass | Delta (ppm) | Composition                                      |
|----------|-------------|----------|------------|-------------|--------------------------------------------------|
| 241.1136 | 249920704.0 | 100.00   | 241.1136   | 0.05        | C <sub>15</sub> H <sub>14</sub> N <sub>2</sub> F |
| 242.1169 | 40768068.0  | 16.31    |            |             |                                                  |
| 274.2740 | 71721320.0  | 28.70    |            |             |                                                  |
| 302.3053 | 15407469.0  | 6.16     |            |             |                                                  |

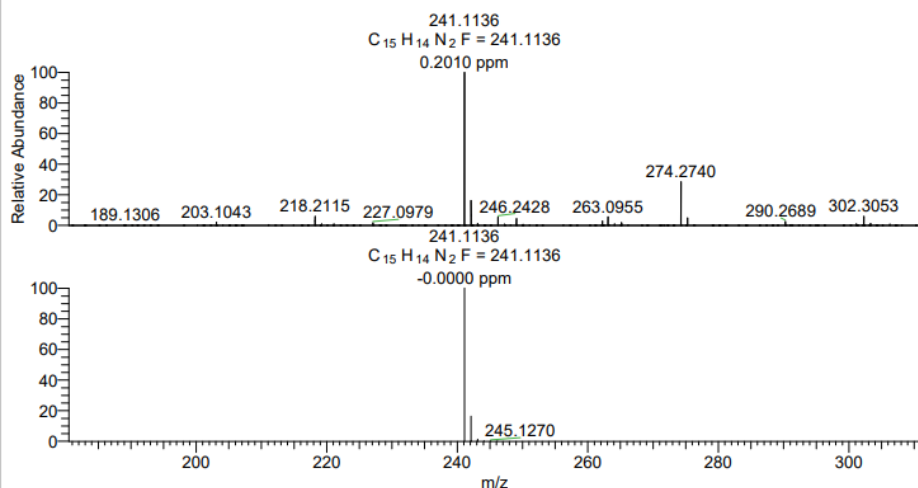

NL:  
2.48E8  
FENGYANG-F-4#1  
RT: 0.00 AV: 1 T:  
FTMS + p ESI Full  
lock ms  
[50.0000-750.0000]

NL:  
8.43E5  
C<sub>15</sub>H<sub>14</sub>FN<sub>2</sub>:  
C<sub>15</sub>H<sub>14</sub>F<sub>1</sub>N<sub>2</sub>  
pa Chrg 1

NMR copies of compound **4n**:

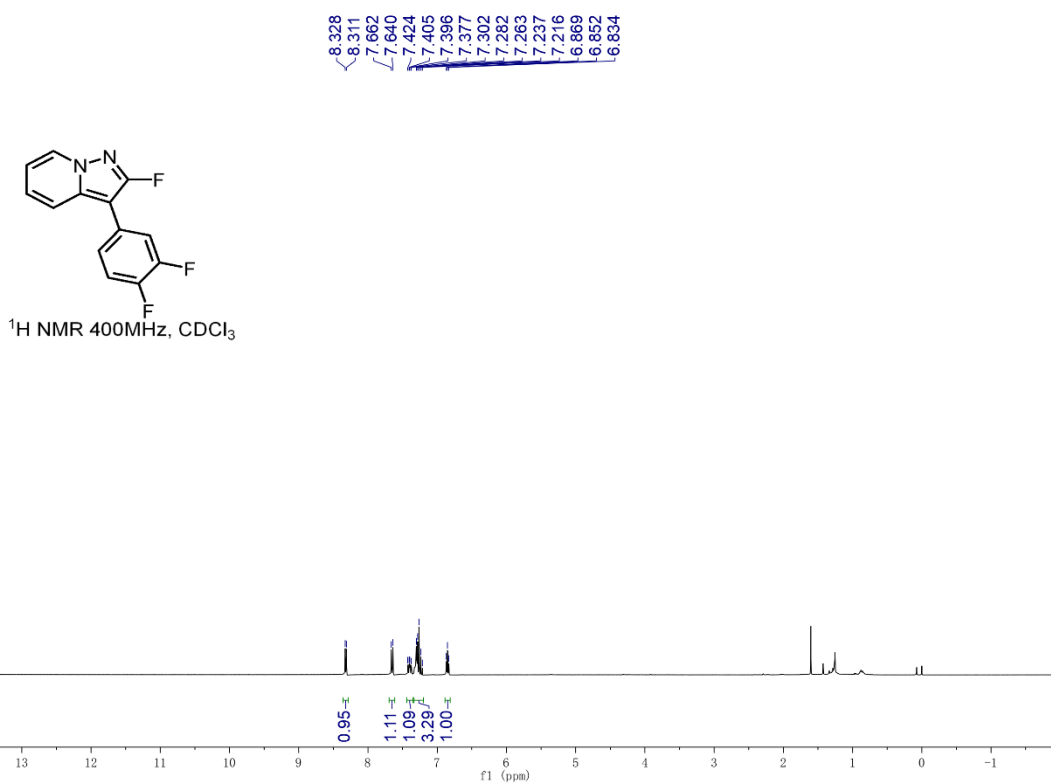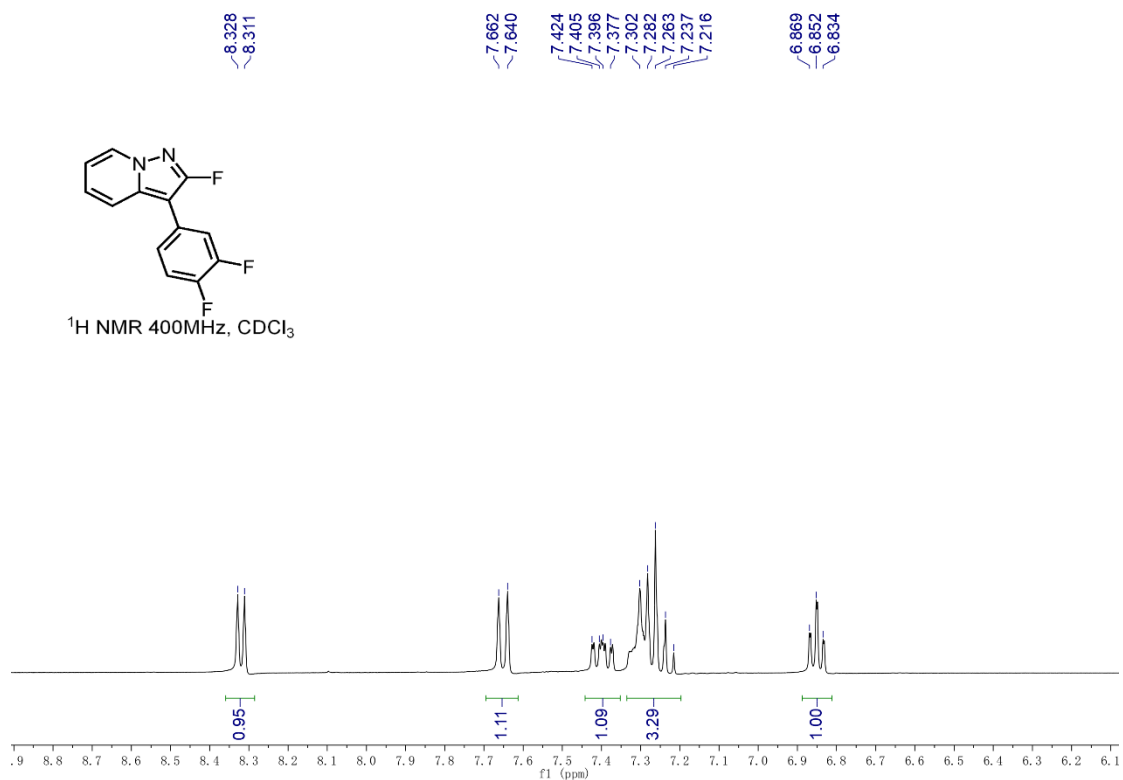

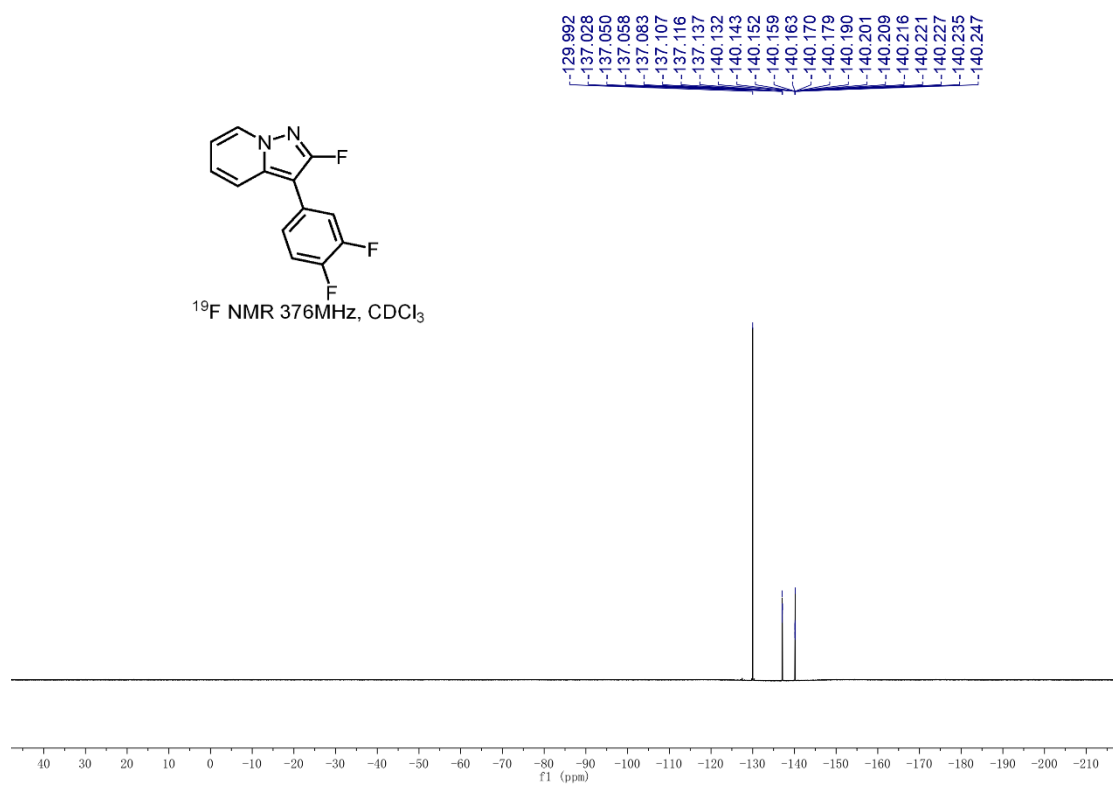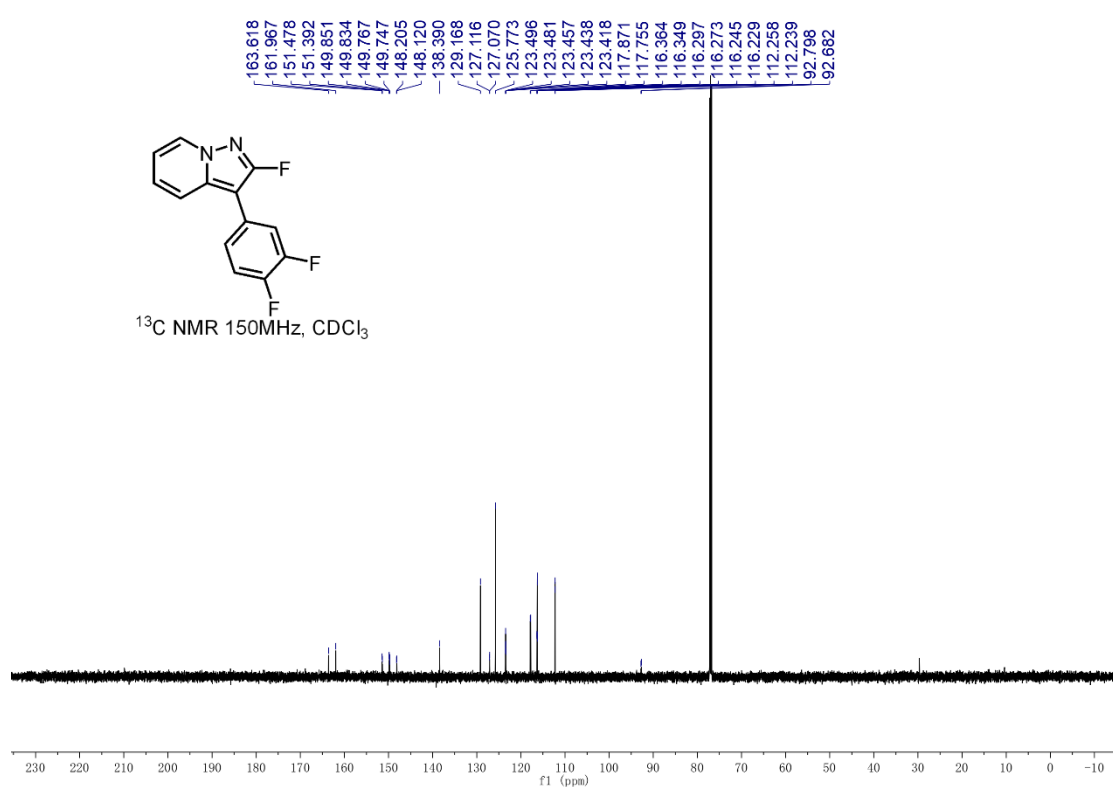



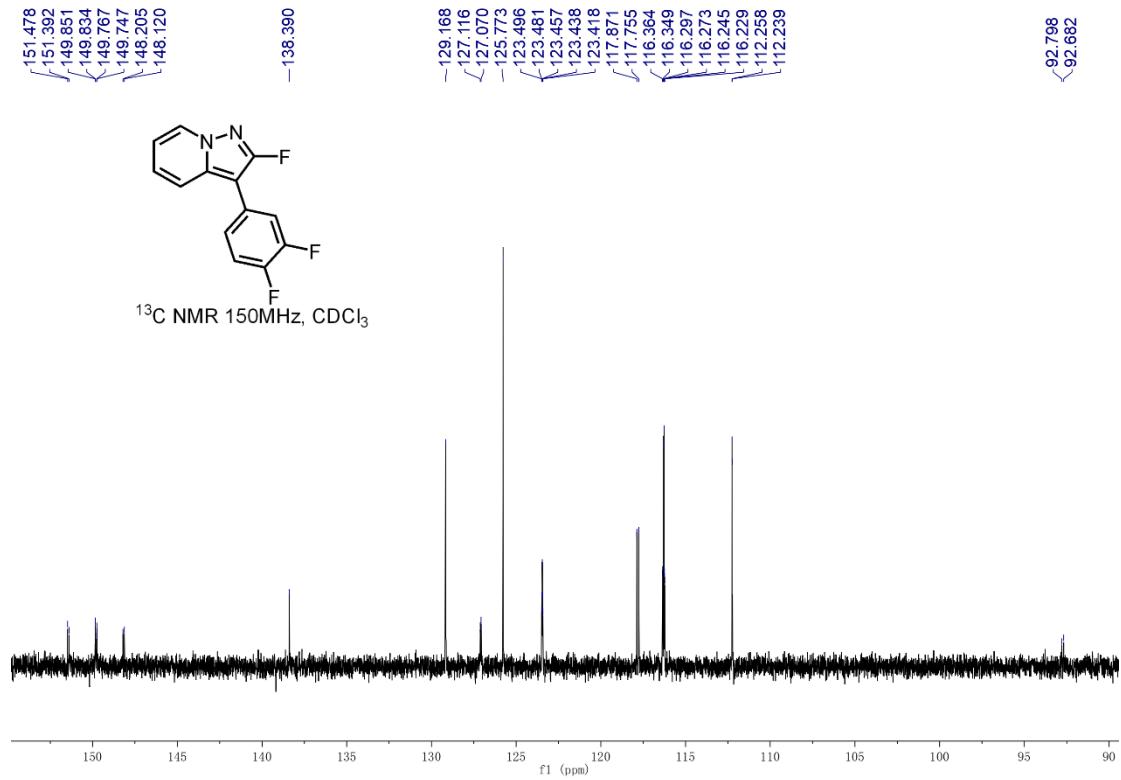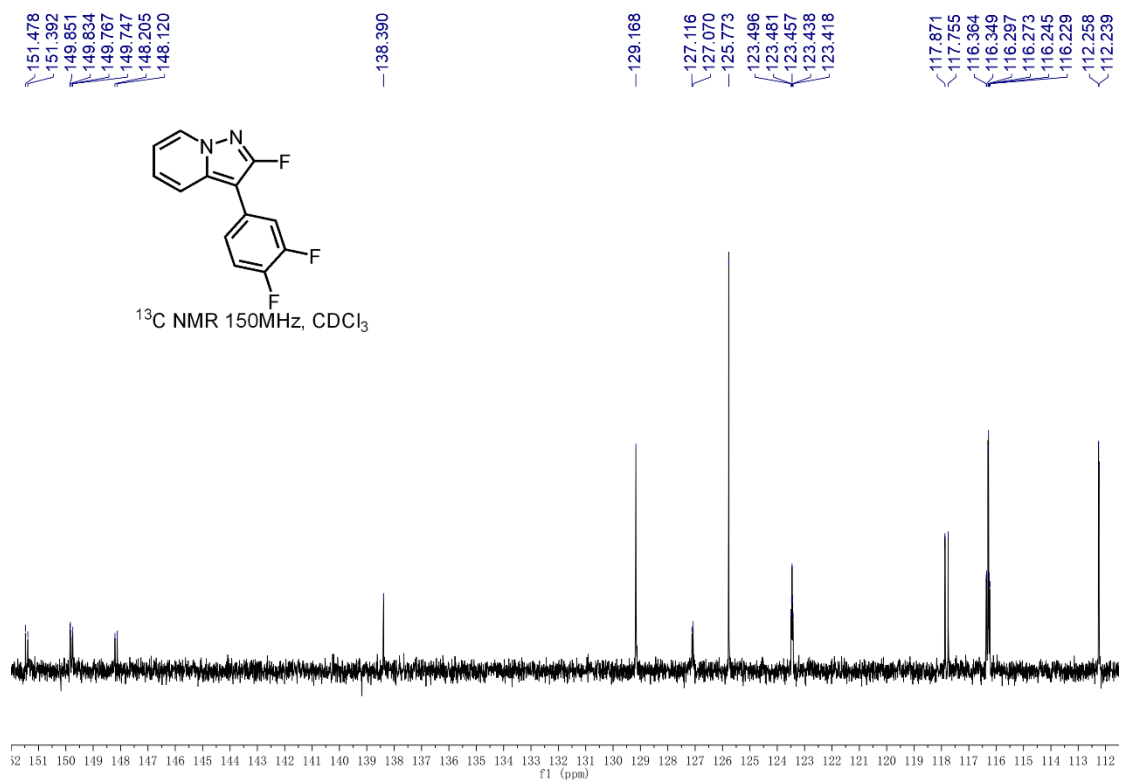

# HRMS (ESI) copy of compound 4n:

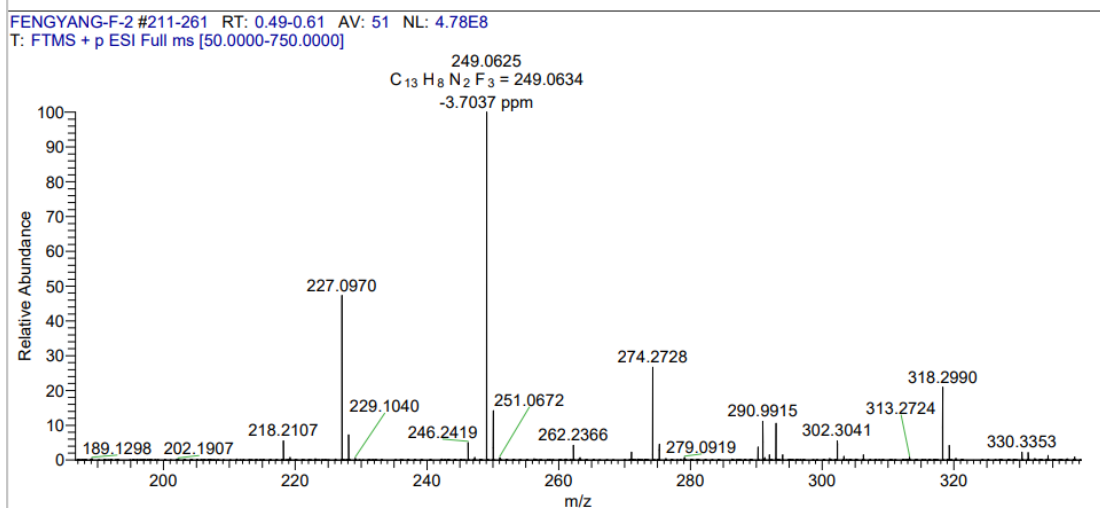

FENGYANG-F-2#211-261 RT: 0.49-0.61 AV: 51  
T: FTMS + p ESI Full ms [50.0000-750.0000]  
m/z = 186.6083-339.2328

| m/z      | Intensity   | Relative | Theo. Mass | Delta (ppm) | Composition                                                  |
|----------|-------------|----------|------------|-------------|--------------------------------------------------------------|
| 227.0970 | 231312192.0 | 48.16    |            |             |                                                              |
| 249.0625 | 480347936.0 | 100.00   | 249.0634   | -0.92       | C <sub>13</sub> H <sub>8</sub> N <sub>2</sub> F <sub>3</sub> |
| 274.2728 | 127533264.0 | 26.55    |            |             |                                                              |
| 318.2990 | 100580936.0 | 20.94    |            |             |                                                              |

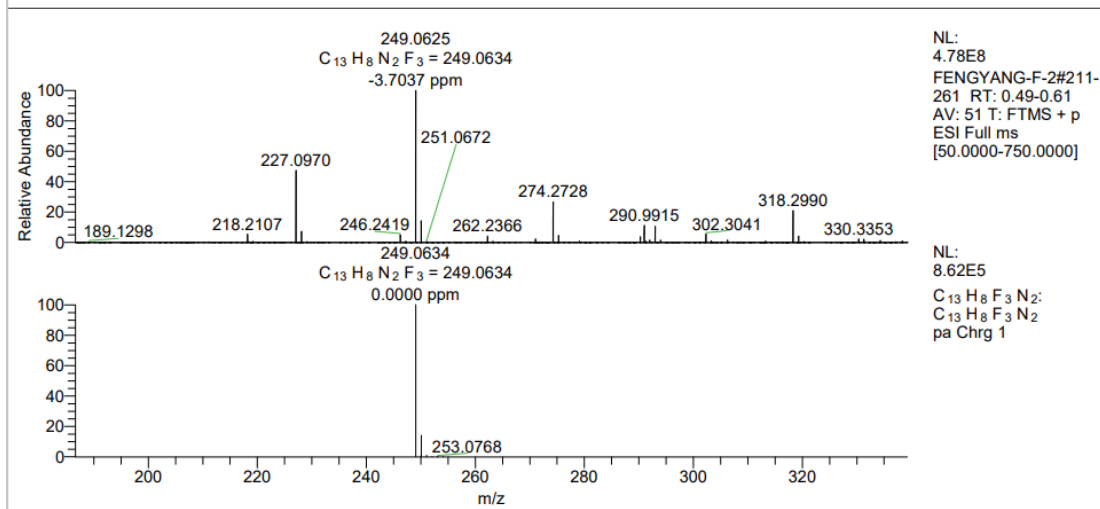

NMR copies of compound **4o**:

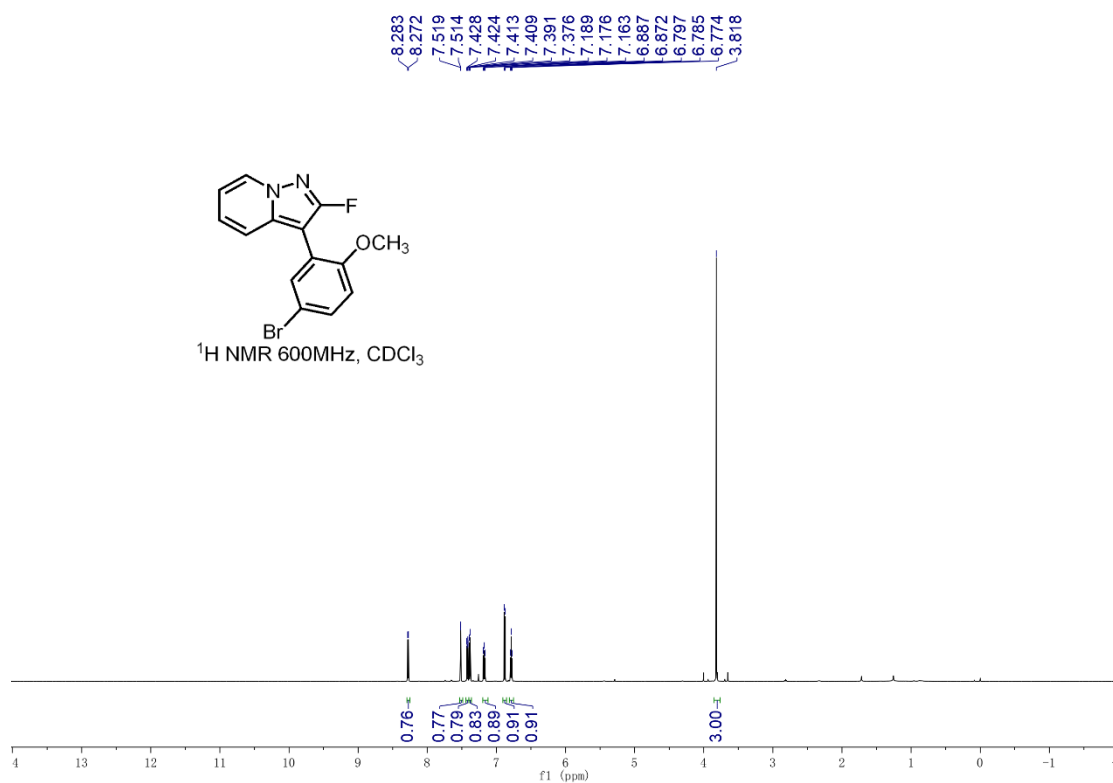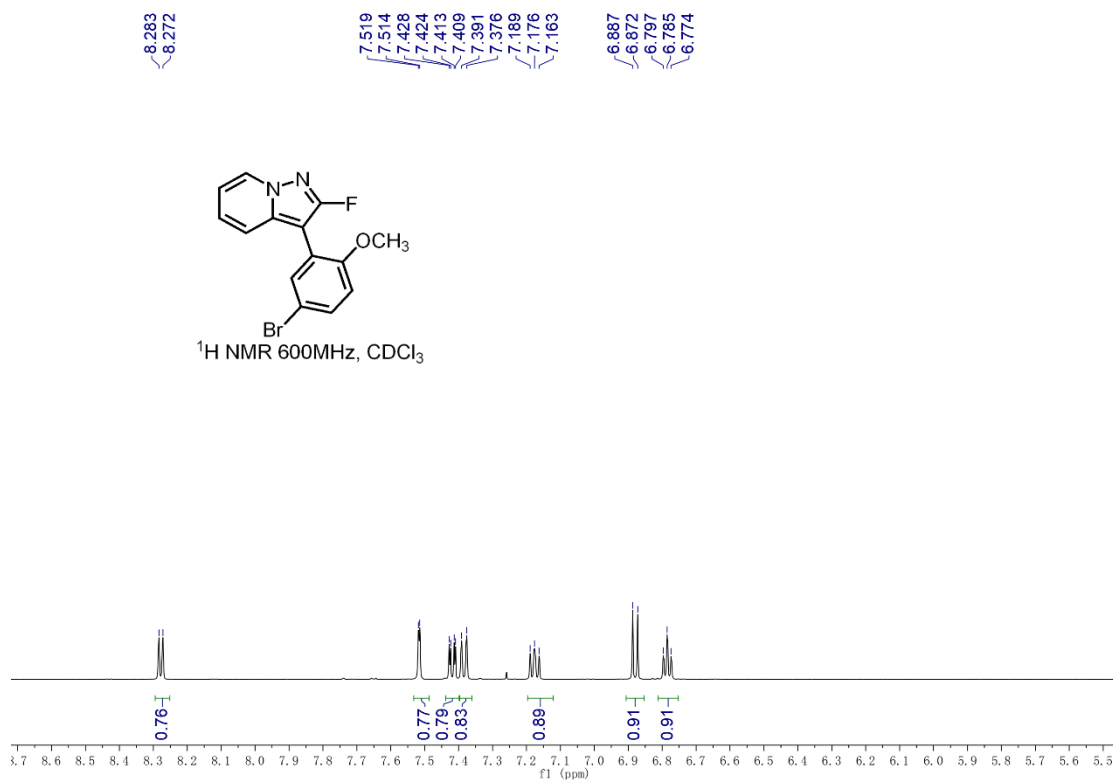

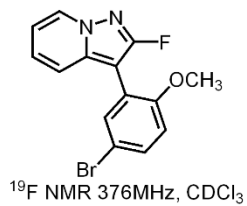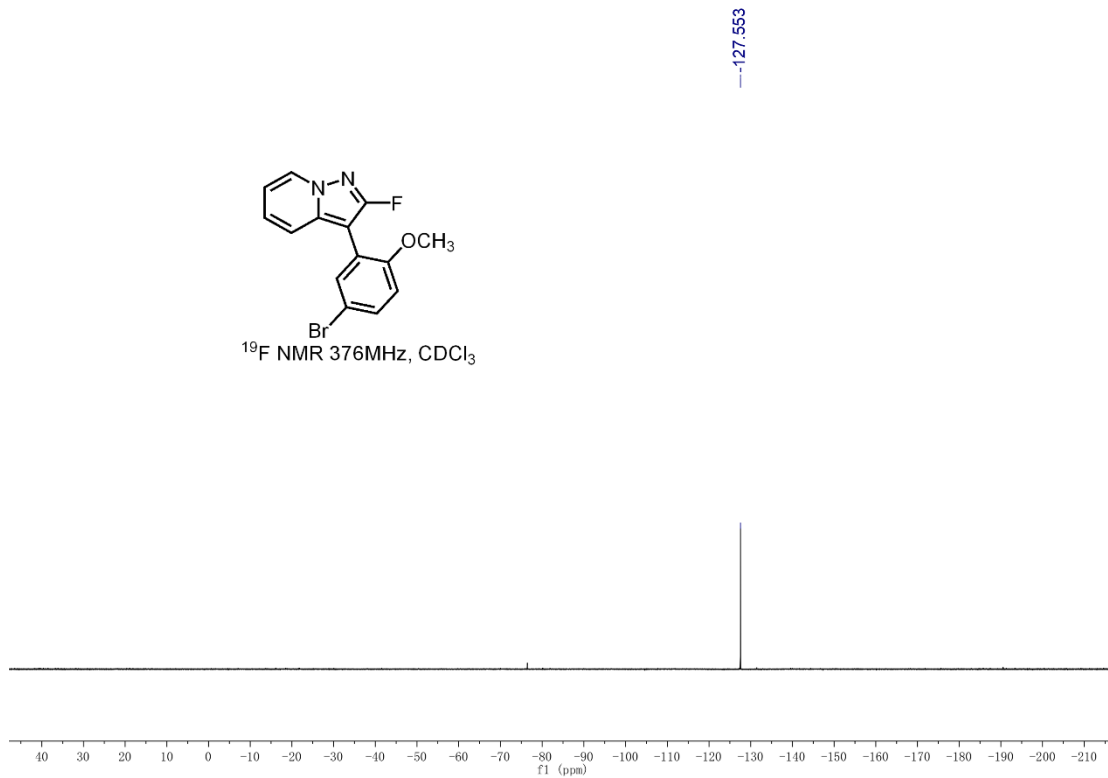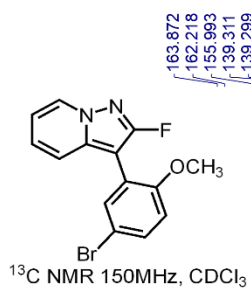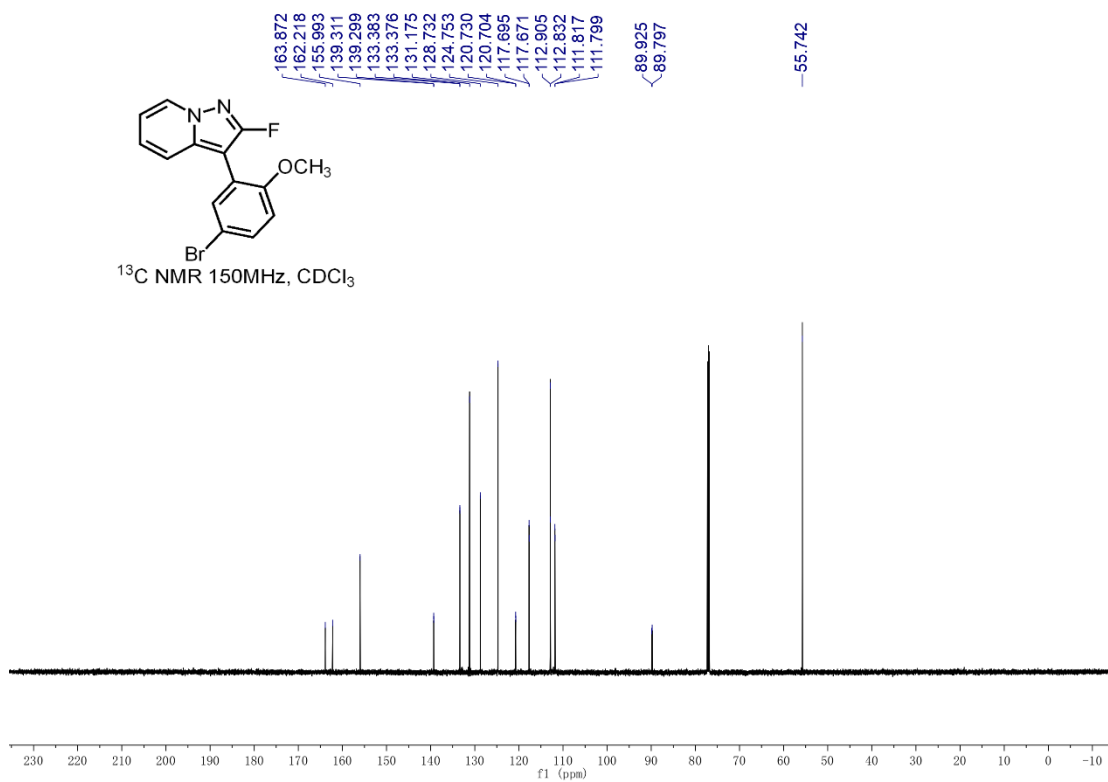

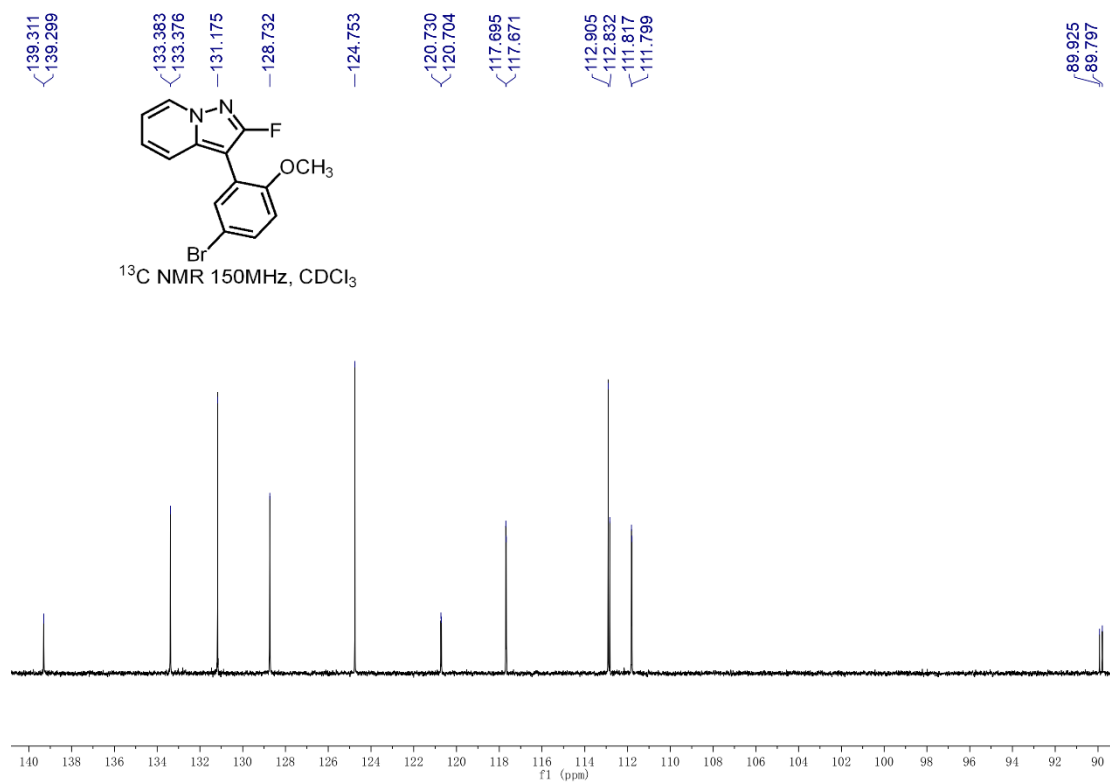

HRMS (ESI) copy of compound **4o**:

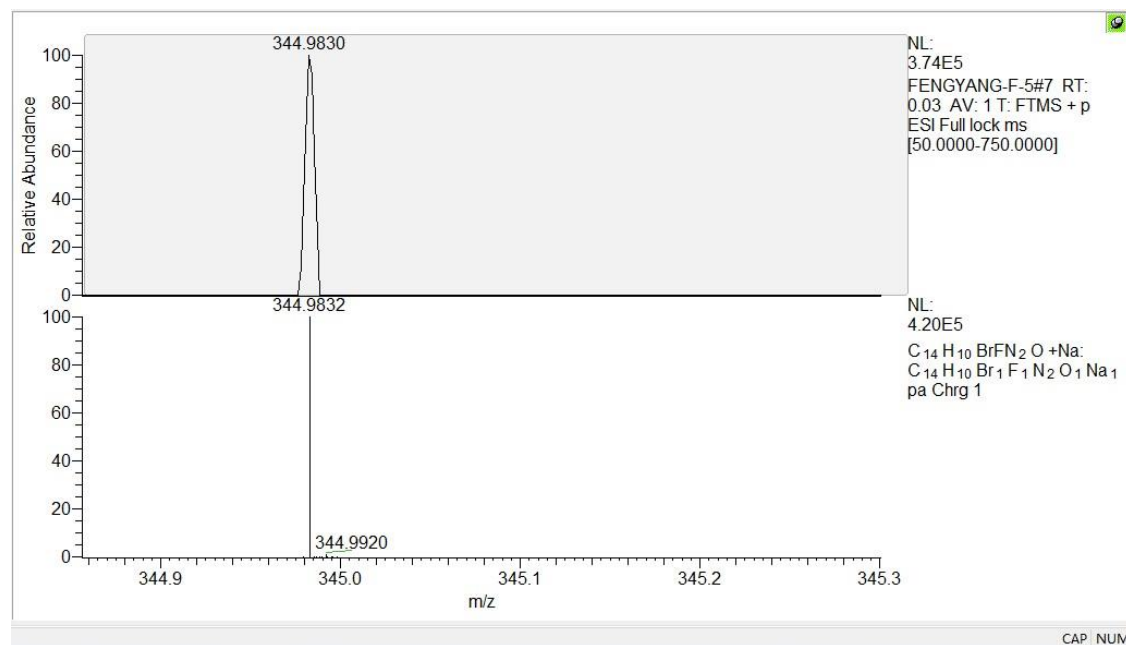

NMR copies of compound **4p**:

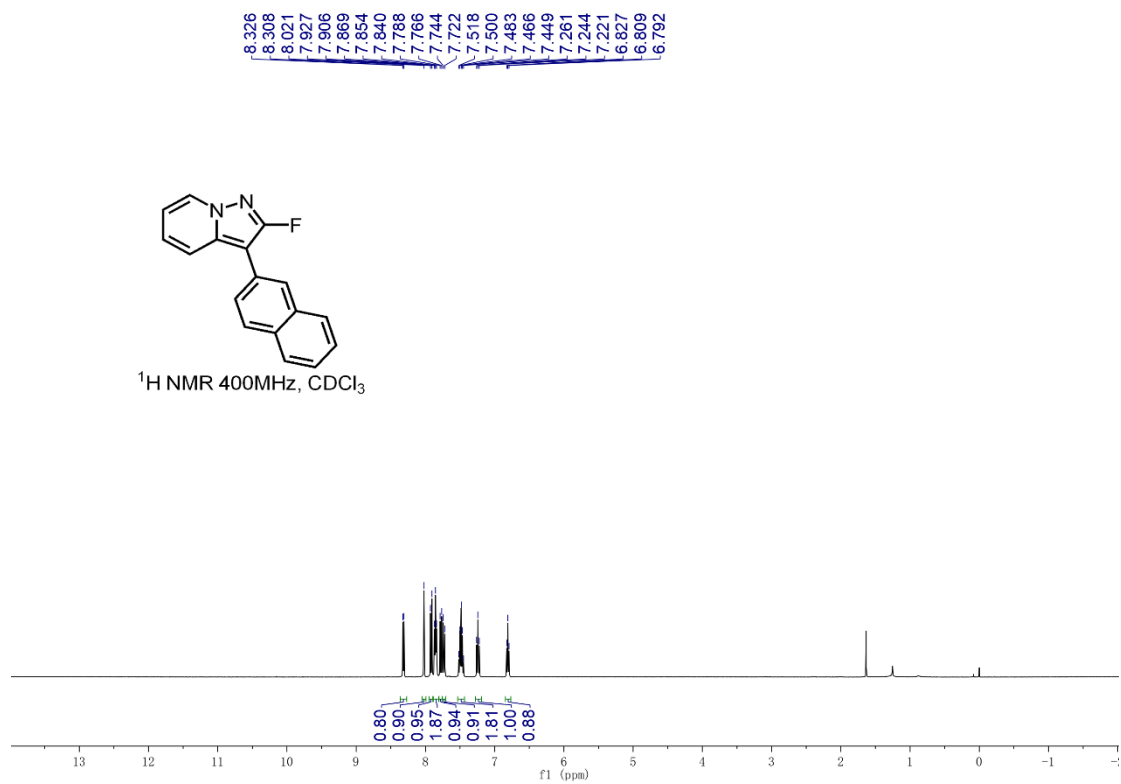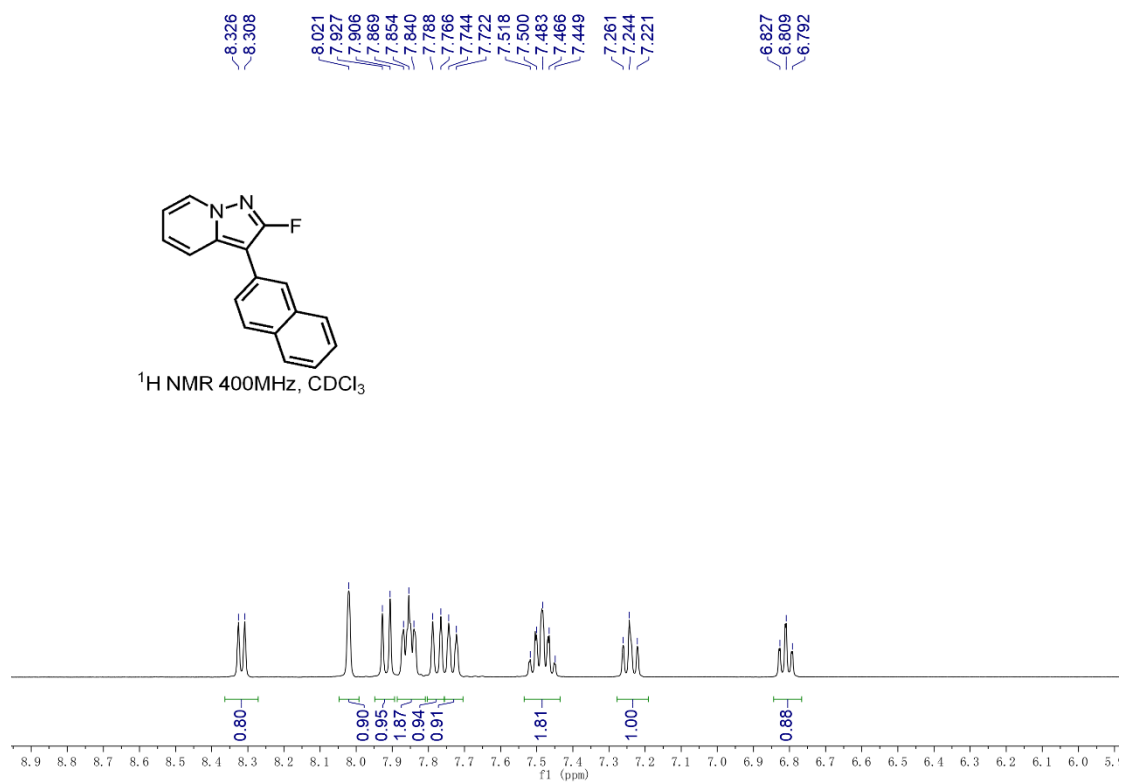

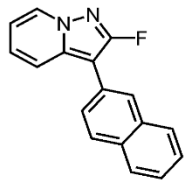

$^{19}\text{F}$  NMR 376MHz,  $\text{CDCl}_3$

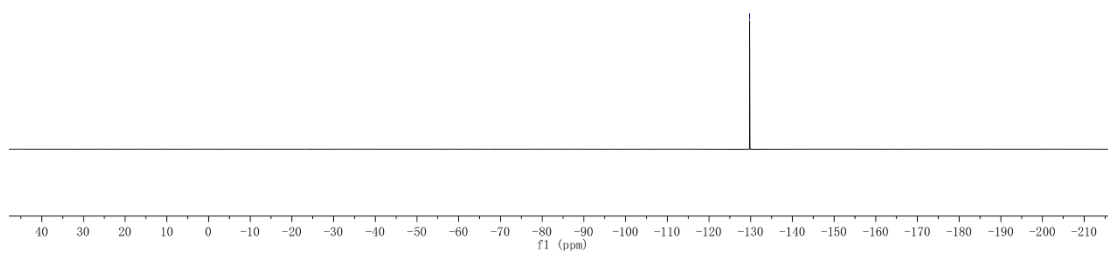

164.008  
162.355  
138.691  
138.680  
133.743  
132.026  
129.078  
128.562  
127.765  
127.716  
127.596  
127.569  
126.416  
125.899  
125.886  
125.854  
125.840  
125.810  
125.355  
116.861  
116.837  
112.055  
112.036  
94.622  
94.506

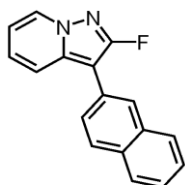

$^{13}\text{C}$  NMR 150MHz,  $\text{CDCl}_3$

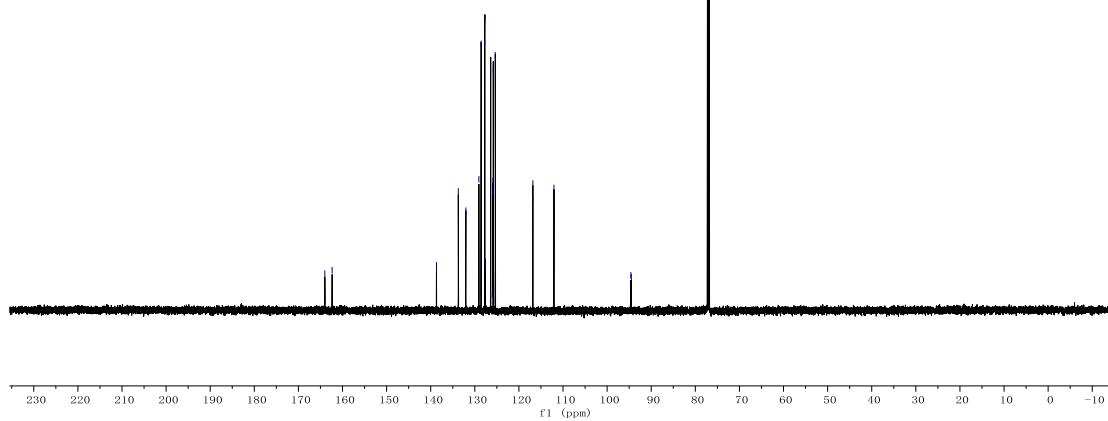

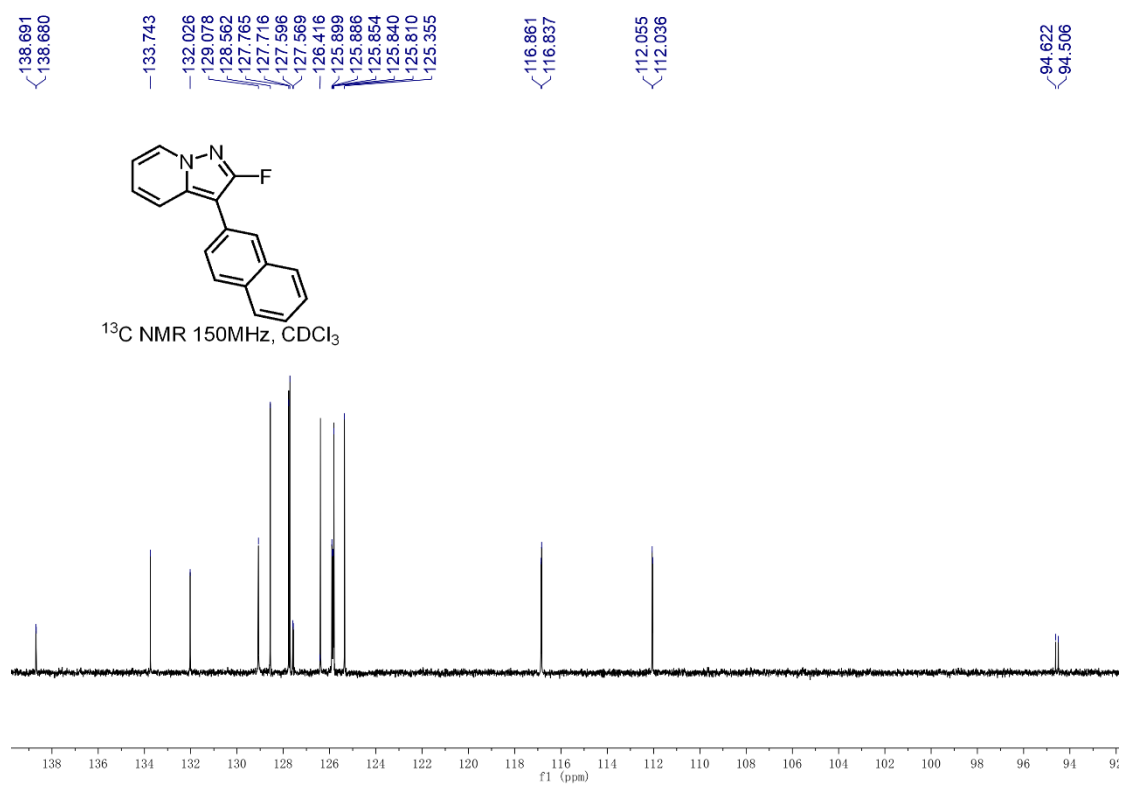

HRMS (ESI) copy of compound **4p**:

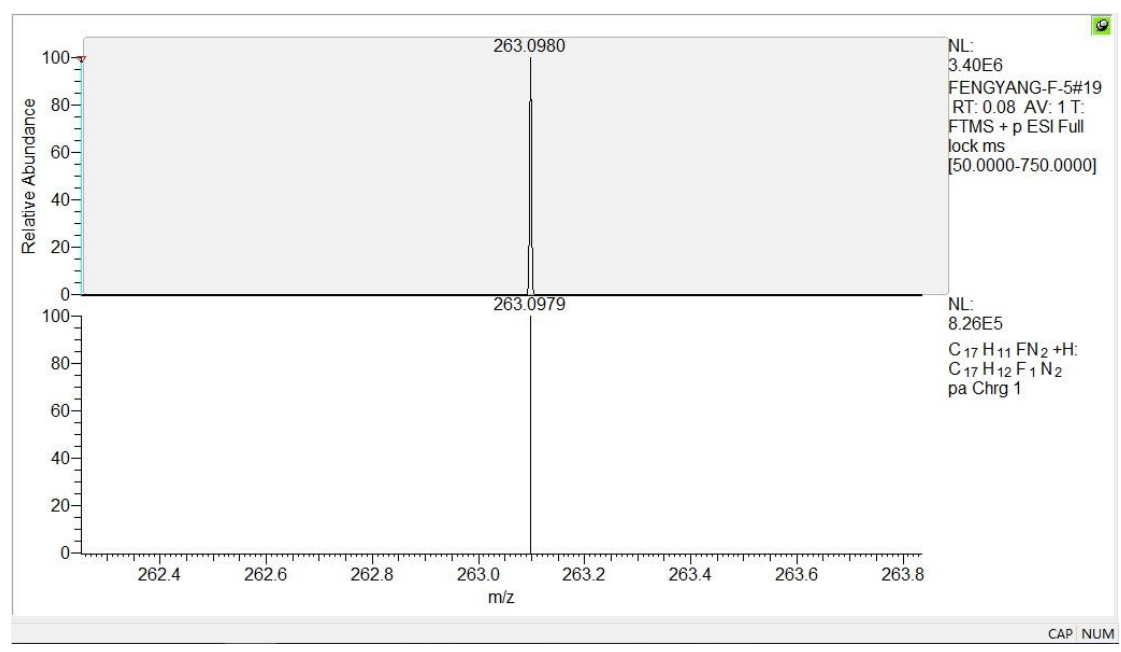



NMR copies of compound **4q**:

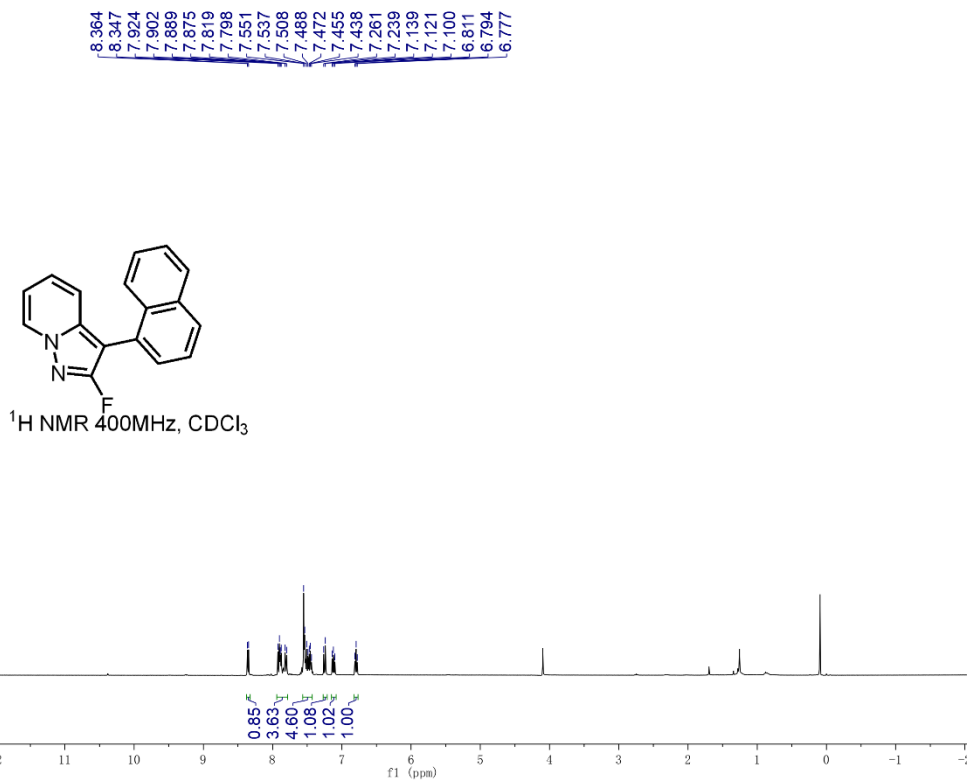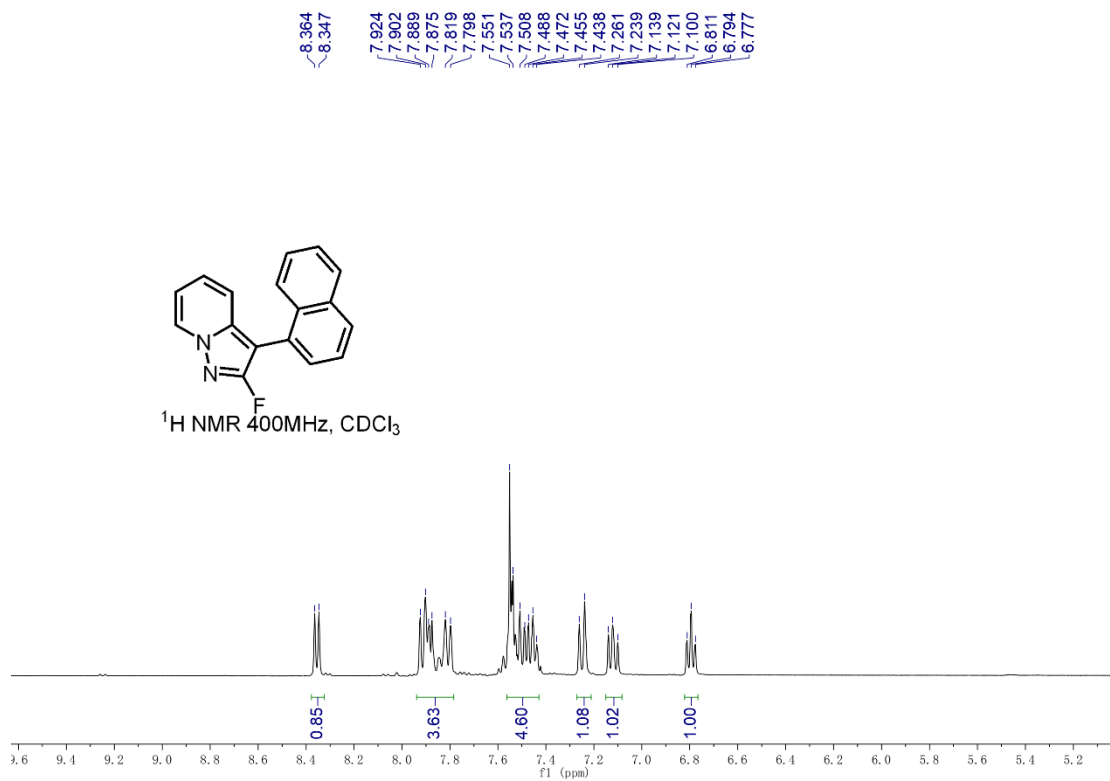

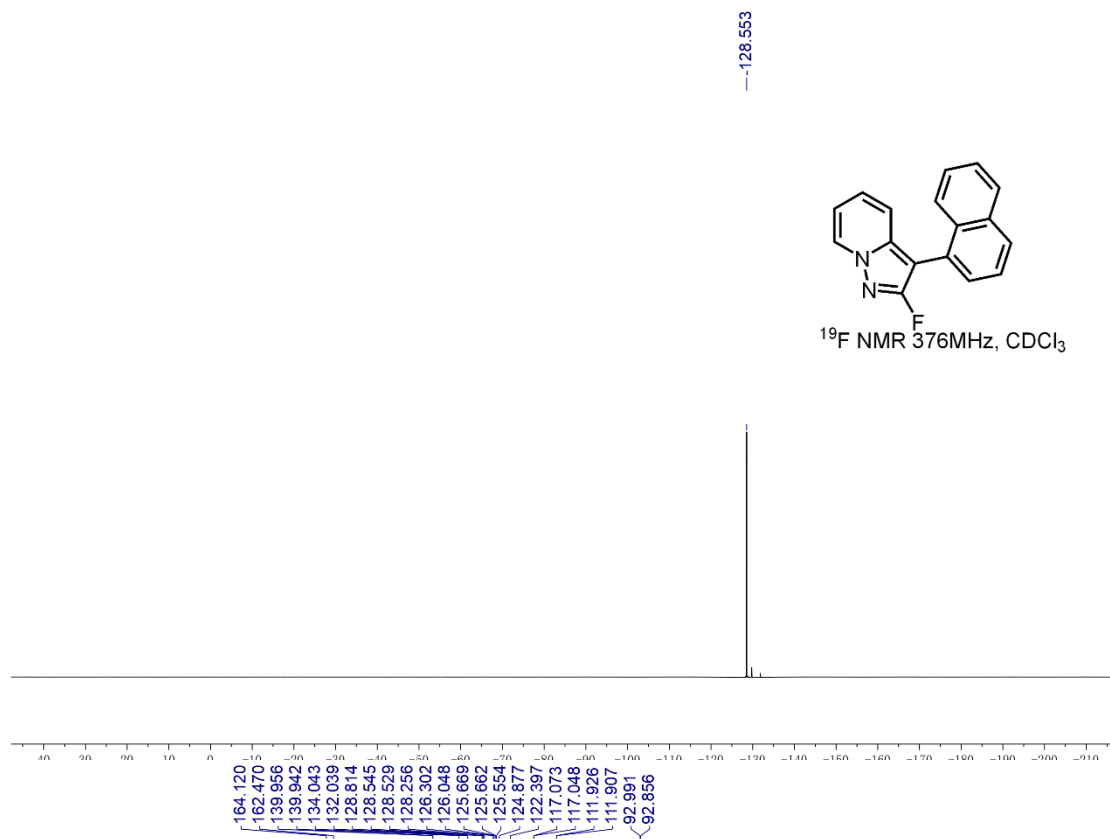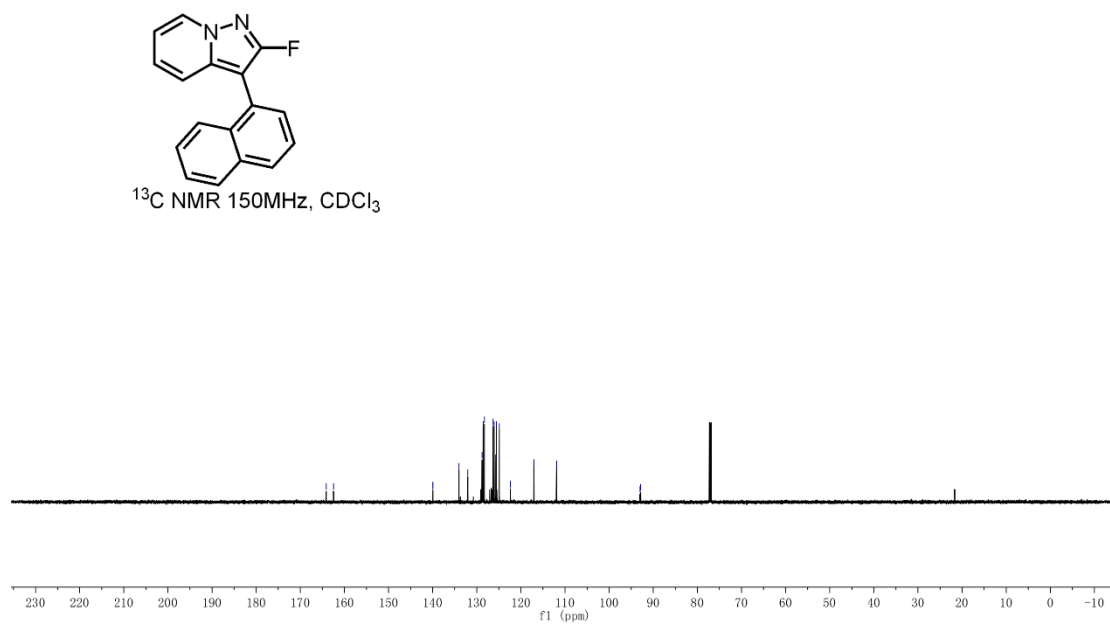

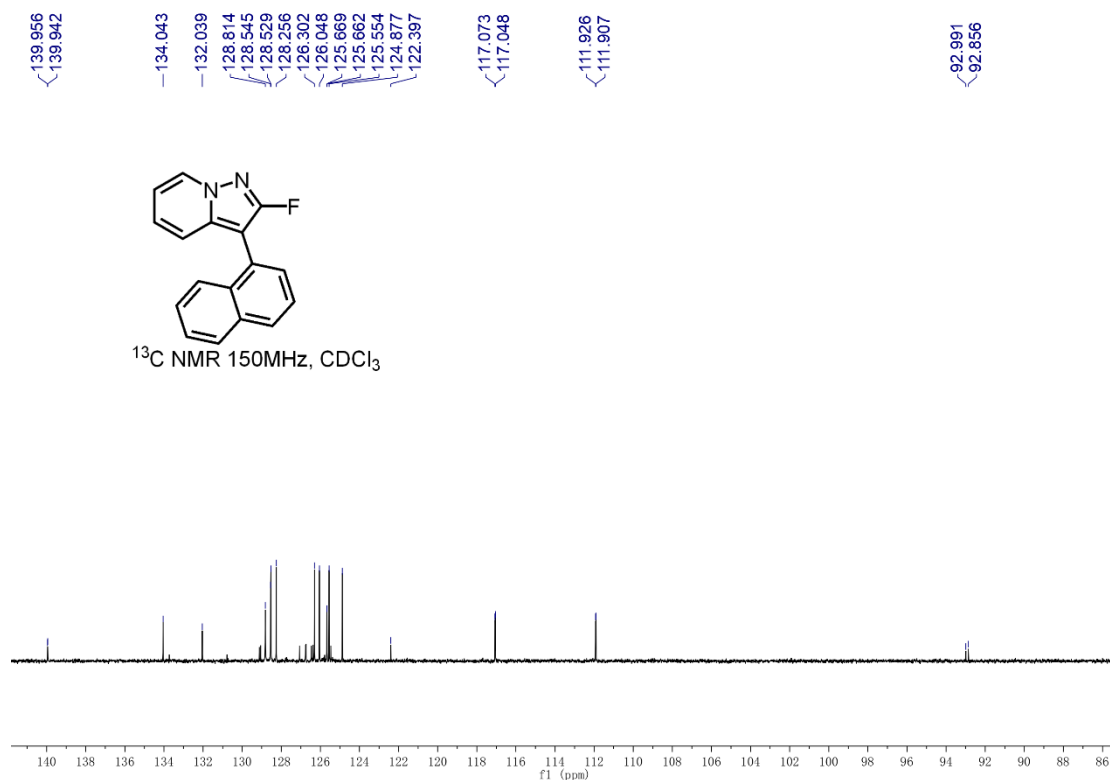

HRMS (ESI) copy of compound **4q**:

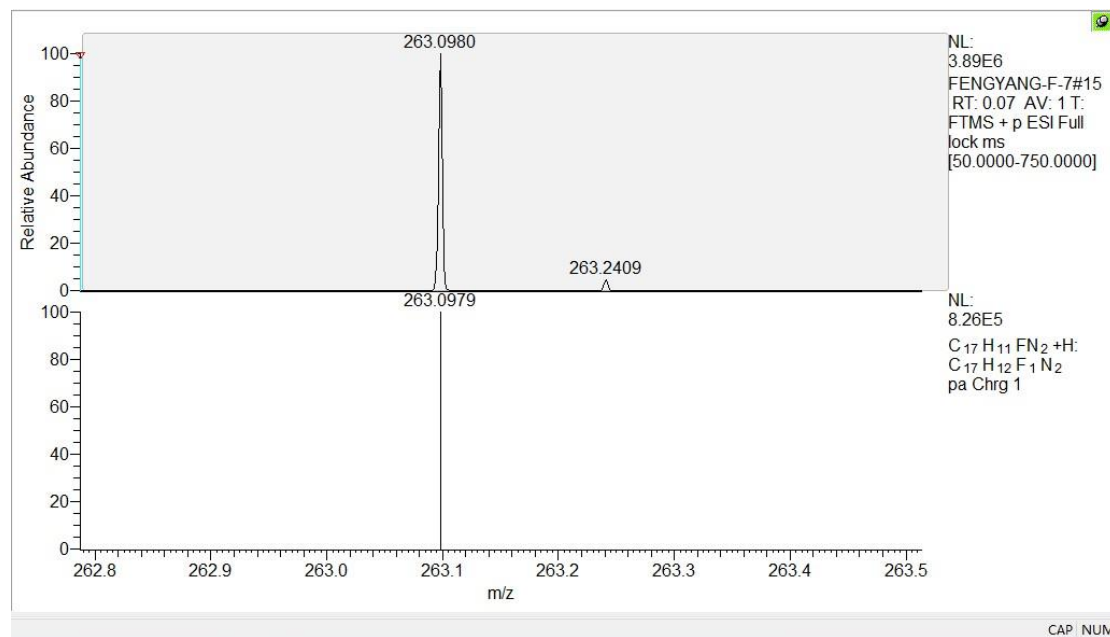

NMR copies of compound **4r**:

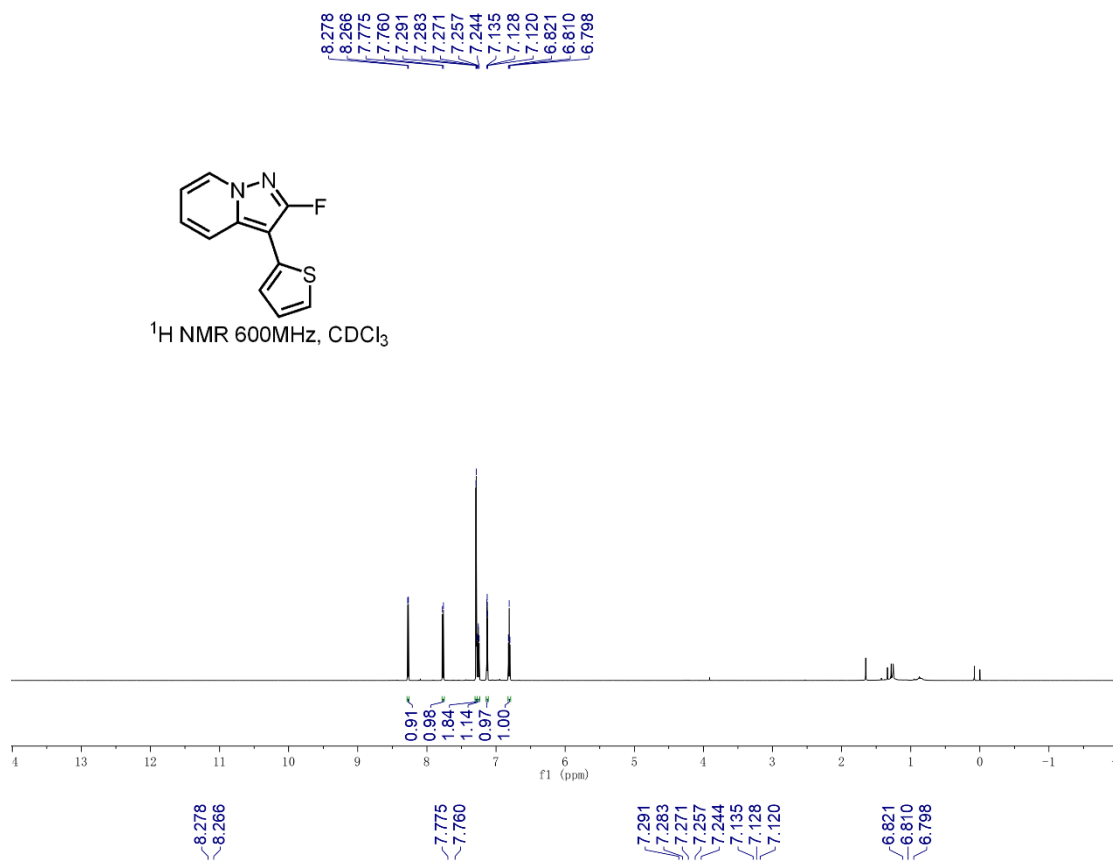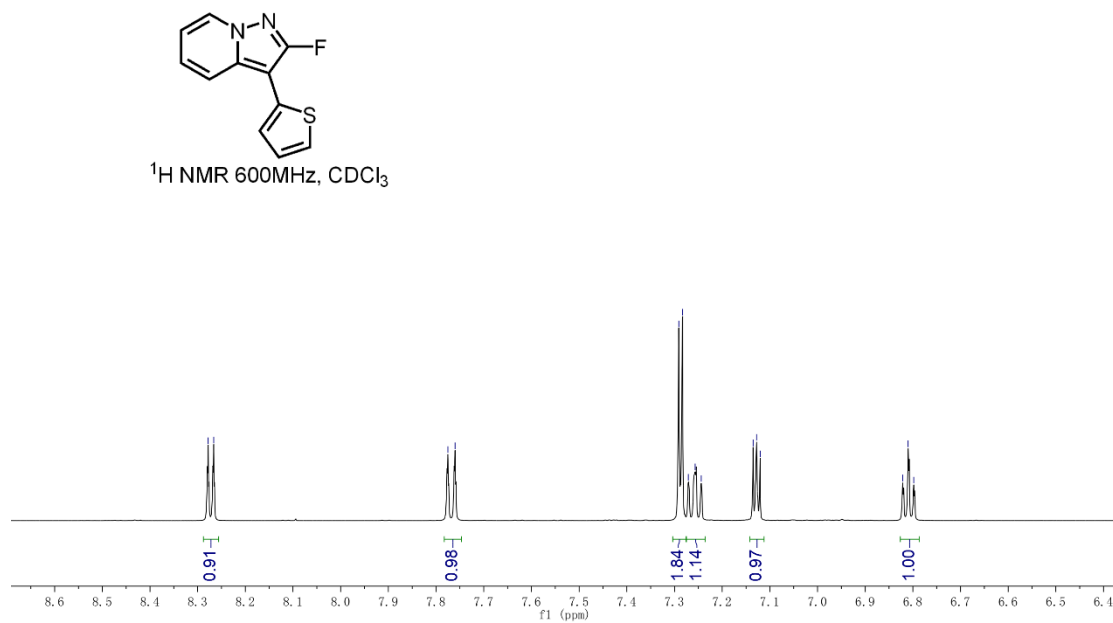

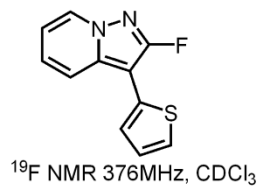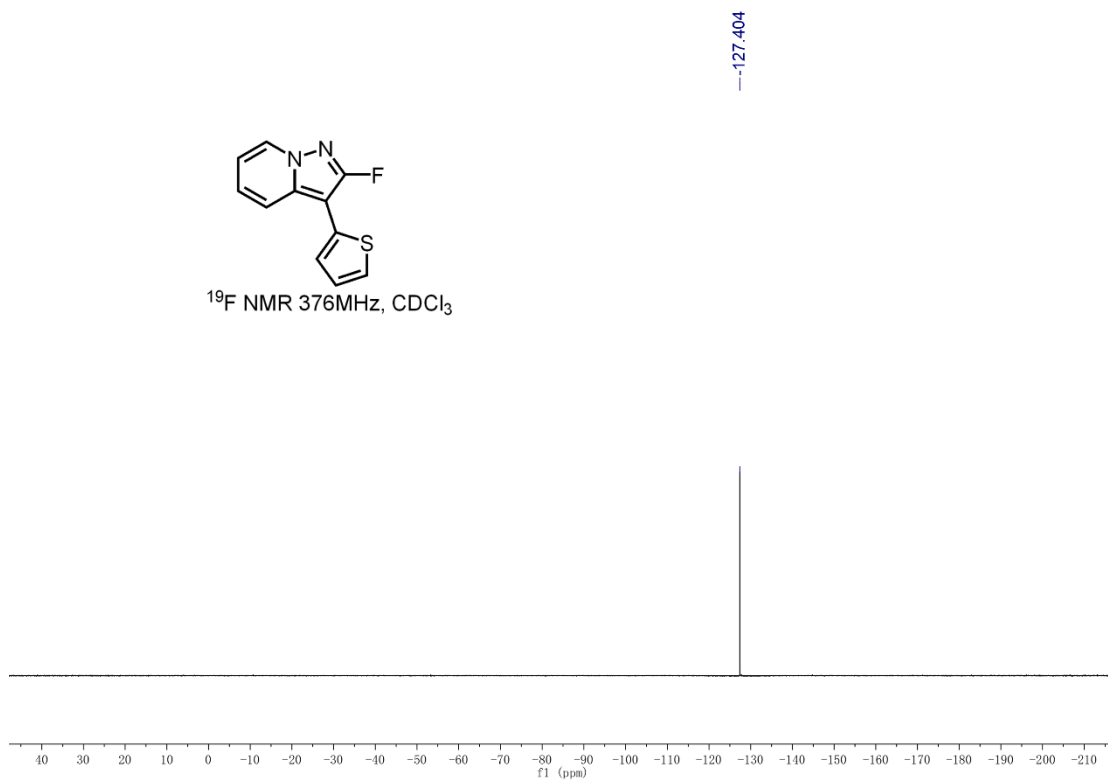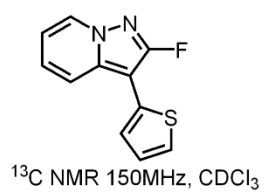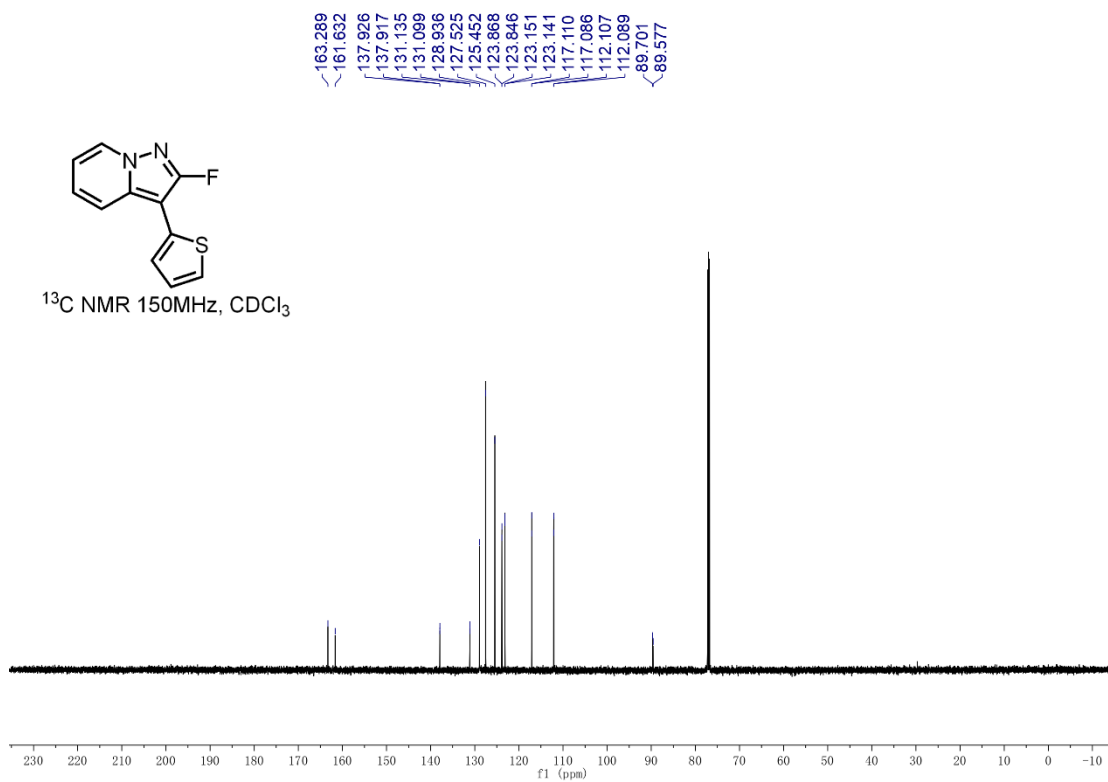

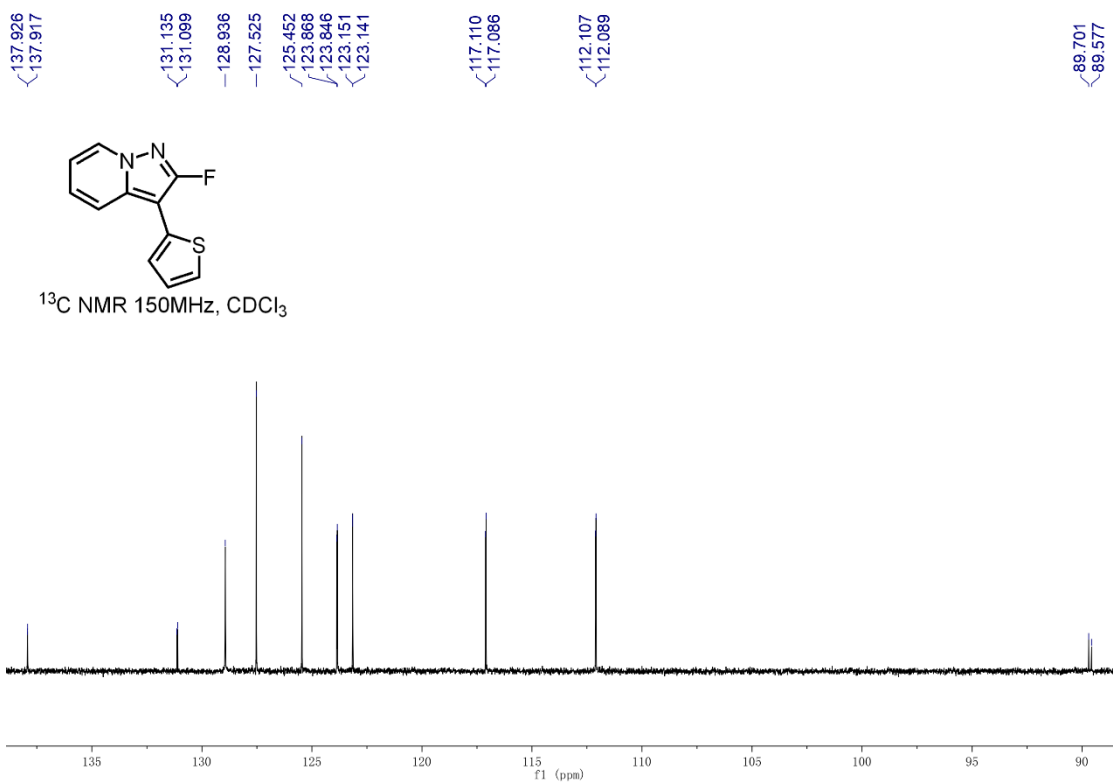

HRMS (ESI) copy of compound **4r**:

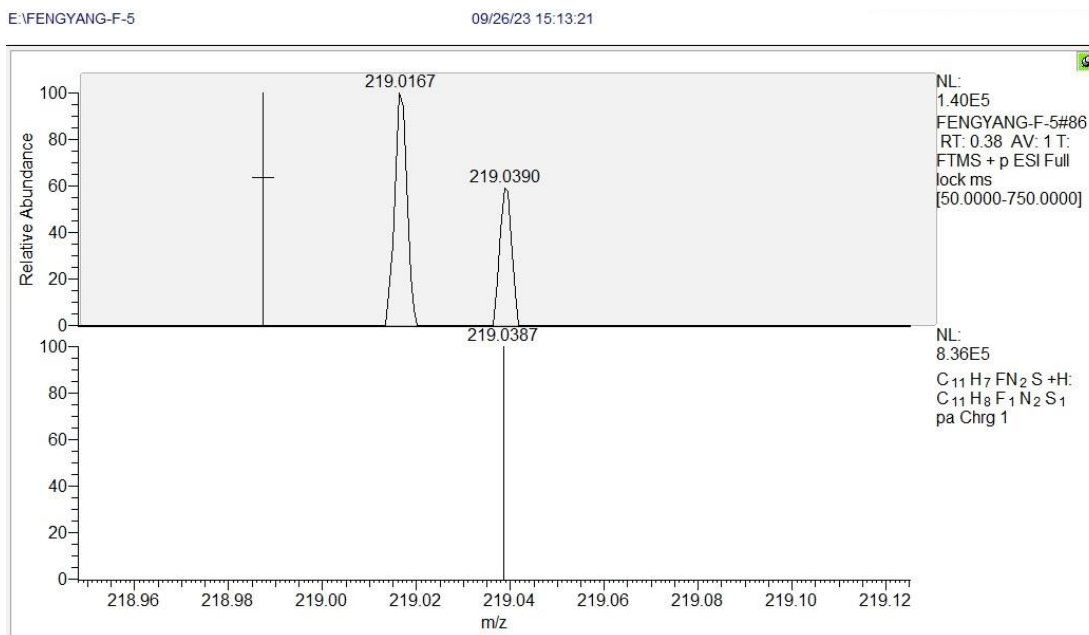



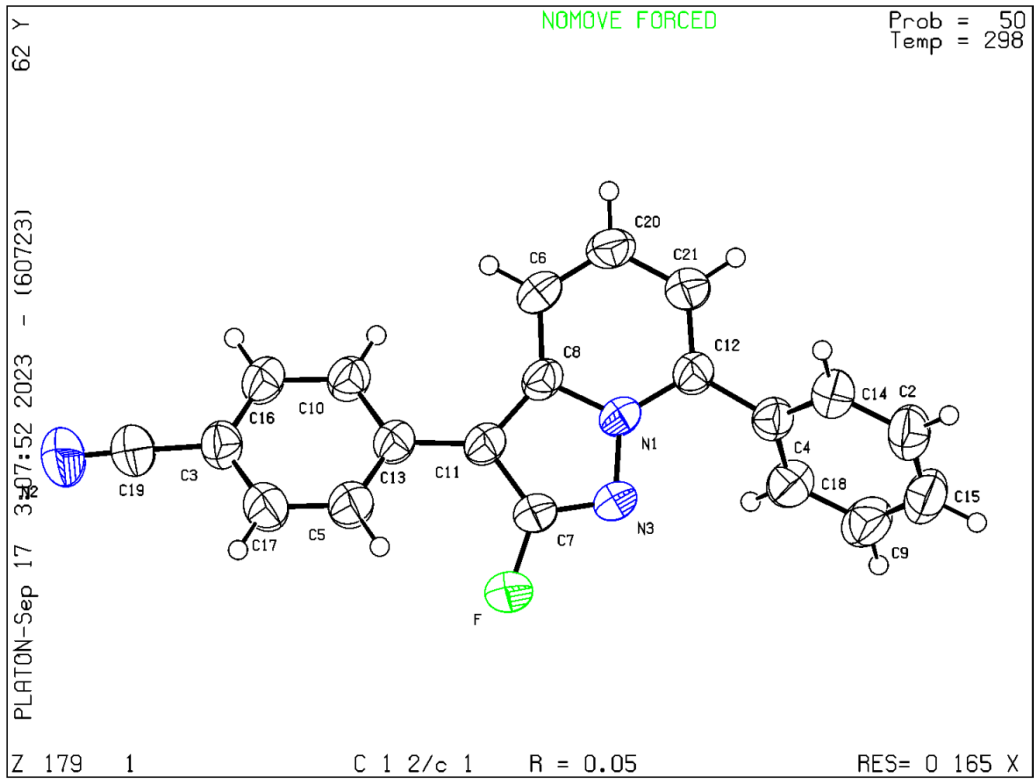



## 8. The electron cloud density of two unsaturated carbons of (2,2-difluorovinyl)benzene:

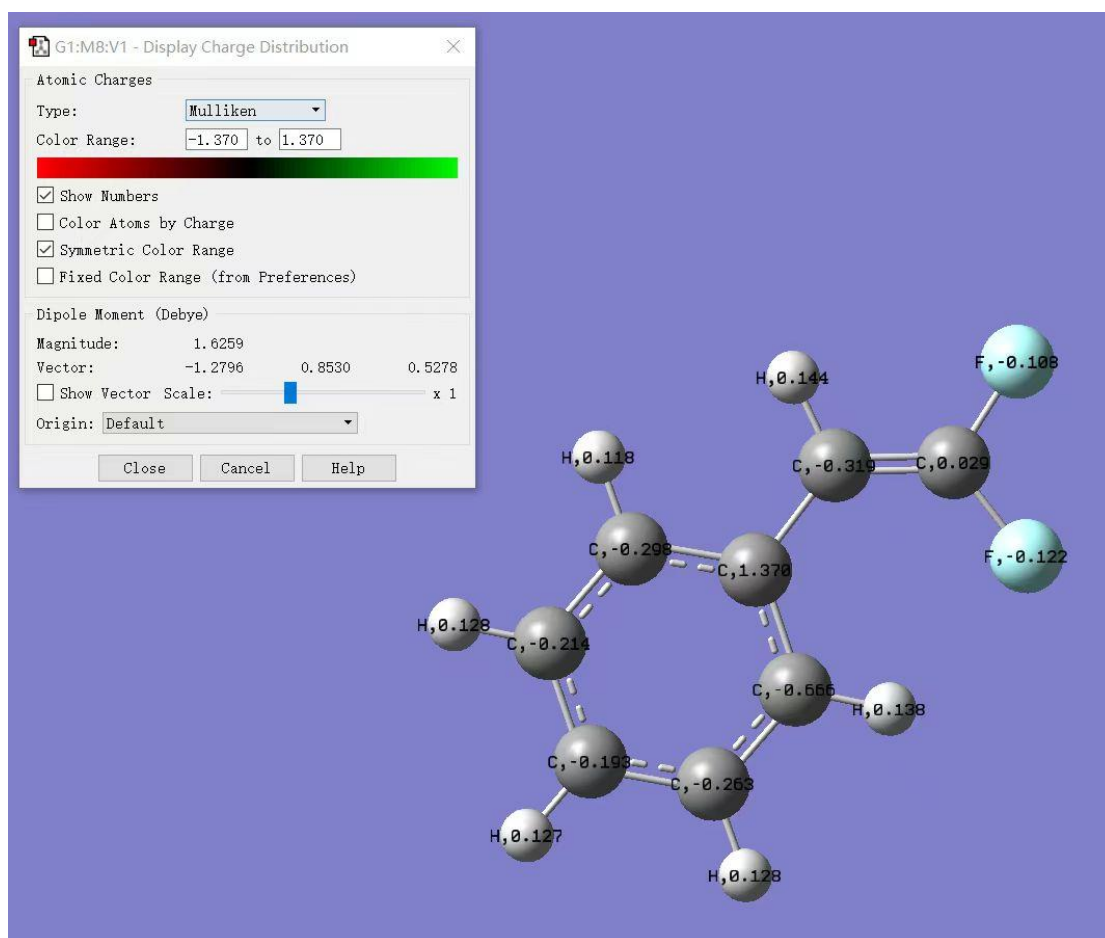

Supplement: d4nj02150a1.pdf [file d4nj02150a1.pdf]
